# Supplementary material for: qPCR multiplex detection of microRNA and messenger RNA in a single reaction
Source: PeerJ. 2020 Jun 25;8:e9004. doi: 10.7717/peerj.9004 (PMC7321665; doi:10.7717/peerj.9004)
Supplement: Supplemental Information 8 [file peerj-08-9004-s008.xls]

## Sheet: Amplification Data_compact
Analysis of Real Time PCR data	version:2016.1	WoL: common				Chemistry: hydrolysis probe	N0 = threshold /(Eff_mean^Cq)			LEGEND
analysis date:9/08/2016		points in WoL: 4				Input: ss-cDNA
Input Sheet: Amplification Data		Threshold: common								Sample Use:
name	indiv_PCR_eff	Amplicon	Sample Name	threshold	mean_PCR_eff	Cq	N0	Sample_Use	Quality_checks	1: used for W-o-L setting
A1_JAG1	1.74598	not_named	120min mixed - c3	0.145	1.80542	27.647	1.16874e-08	1 0 3	- - - - - 5 6 - - - - - - -	2: contributes to mean PCR efficiency
A2_JAG1	1.83477	not_named	120min mixed - c3	0.145	1.80542	28.203	8.4152e-09	1 2 3	0 - - - - - - - - - - - - -	3: N0 value calculated
A3_JAG1	1.77825	not_named	120min mixed - c3	0.145	1.80542	27.8421	1.04153e-08	1 2 3	0 - - - - - - - - - - - - -	0: not used / calculated
A4_JAG1	1.74556	not_named	120min mixed - c4	0.145	1.80542	28.5762	6.75003e-09	1 0 3	- - - - - 5 6 - - - - - - -
A5_JAG1	1.80784	not_named	120min mixed - c4	0.145	1.80542	28.2401	8.23271e-09	1 2 3	0 - - - - - - - - - - - - -	Quality Checks:
A6_JAG1	1.73159	not_named	120min mixed - c4	0.145	1.80542	28.2309	8.27766e-09	1 0 3	- - - - - 5 6 - - - - - - -	0: passed all checks
A7_JAG1	1.81815	not_named	120min mixed -m3	0.145	1.80542	29.6271	3.62811e-09	1 2 3	0 - - - - - - - - - - - - -	1: no amplification
A8_JAG1	1.65685	not_named	120min mixed -m3	0.145	1.80542	29.1469	4.81815e-09	0 0 3	- - 2 - - 5 6 - - 9 - - - -	2: baseline error
A9_JAG1	1.82003	not_named	120min mixed -m3	0.145	1.80542	29.3595	4.24938e-09	1 2 3	0 - - - - - - - - - - - - -	3: no plateau
A10_JAG1	1.83646	not_named	120min mixed -m4	0.145	1.80542	29.5547	3.7867e-09	1 2 3	0 - - - - - - - - - - - - -	4: noisy sample
A11_JAG1	1.81984	not_named	120min mixed -m4	0.145	1.80542	29.3486	4.27703e-09	1 2 3	0 - - - - - - - - - - - - -	5: PCR efficiency outside 5%
A12_JAG1	1.78749	not_named	120min mixed -m4	0.145	1.80542	29.9394	3.01684e-09	1 2 3	0 - - - - - - - - - - - - -	6: excluded from mean Eff
B1_JAG1	1.91021	not_named	120min random - c3	0.145	1.80542	28.478	7.15349e-09	1 0 3	- - - - - 5 6 - - - - - - -	7: excluded by user
B2_JAG1	1.86169	not_named	120min random - c3	0.145	1.80542	27.233	1.49262e-08	1 0 3	- - - - - 5 6 - - - - - - -	8: included by user
B3_JAG1	1.84898	not_named	120min random - c3	0.145	1.80542	27.3157	1.42143e-08	1 2 3	0 - - - - - - - - - - - - -	9: manual baseline
B4_JAG1	1.7158	not_named	120min random - c4	0.145	1.80542	26.7898	1.93945e-08	1 0 3	- - - - - 5 6 - - - - - - -
B5_JAG1	1.7636	not_named	120min random - c4	0.145	1.80542	26.7281	2.01144e-08	1 2 3	0 - - - - - - - - - - - - -	if amplicon groups are defined the rules are applied per group
B6_JAG1	1.77014	not_named	120min random - c4	0.145	1.80542	26.8727	1.84664e-08	1 2 3	0 - - - - - - - - - - - - -
B7_JAG1	1.67937	not_named	120min random -m3	0.145	1.80542	28.5552	6.83421e-09	0 0 3	- - 2 - - 5 6 - - 9 - - - -	User Choices:
B8_JAG1	1.80763	not_named	120min random -m3	0.145	1.80542	29.8561	3.169e-09	1 2 3	0 - - - - - - - - - - - - -
B9_JAG1		not_named	120min random -m3	0.145	1.80542	29.2522	4.5275e-09	0 0 3	- - 2 - - 5 6 - - 9 - - - -	Calculation of Mean Efficiency:
B10_JAG1	1.79116	not_named	120min random -m4	0.145	1.80542	30.1079	2.73091e-09	1 2 3	0 - - - - - - - - - - - - -	exclude <no plateau> samples
B11_JAG1	1.7916	not_named	120min random -m4	0.145	1.80542	30.7349	1.88558e-09	1 2 3	0 - - - - - - - - - - - - -	exclude <efficiency outlier> samples
B12_JAG1	1.8708	not_named	120min random -m4	0.145	1.80542	29.7019	3.47131e-09	1 0 3	- - - - - 5 6 - - - - - - -	efficiency outlier defined as >5% from group median
										Baseline Estimation:
										log-linear phase criterion: strictly continuous Log-linear phase
	1.774
	1.7898
	1.81174
	1.78811

## Sheet: Amplification Data_output
Analysis of Real Time PCR data	version:2016.1	WoL: common							Chemistry: hydrolysis probe					N0 = threshold /(Eff_mean^Cq)			LEGEND
analysis date:9/08/2016		points in WoL: 4							Input: ss-cDNA
Input Sheet: Amplification Data		Threshold: common															Sample Use:
sample	name	lower_limit	upper_limit	n_included	N0_(indiv_eff)	indiv PCR eff	R2	threshold	Cq	Baseline	Amplicon	mean_PCR_eff	Sample Name	N0_(mean eff)	Sample_Use	Quality_checks	1: used for W-o-L setting
1	A1_JAG1	0.0275423	0.290402	4	2.94907e-08	1.74598	0.999948	0.145	27.647	1.01228	not_named	1.80542	120min mixed - c3	1.16874e-08	1 0 3	- - - - - 5 6 - - - - - - -	2: contributes to mean PCR efficiency
2	A2_JAG1	0.0275423	0.290402	4	5.34046e-09	1.83477	0.999442	0.145	28.203	1.05913	not_named	1.80542	120min mixed - c3	8.4152e-09	1 2 3	0 - - - - - - - - - - - - -	3: N0 value calculated
3	A3_JAG1	0.0275423	0.290402	4	1.58885e-08	1.77825	0.997975	0.145	27.8421	1.09659	not_named	1.80542	120min mixed - c3	1.04153e-08	1 2 3	0 - - - - - - - - - - - - -	0: not used / calculated
4	A4_JAG1	0.0275423	0.290402	4	1.7691e-08	1.74556	0.99574	0.145	28.5762	1.07191	not_named	1.80542	120min mixed - c4	6.75003e-09	1 0 3	- - - - - 5 6 - - - - - - -
5	A5_JAG1	0.0275423	0.290402	4	7.92732e-09	1.80784	0.998747	0.145	28.2401	1.11503	not_named	1.80542	120min mixed - c4	8.23271e-09	1 2 3	0 - - - - - - - - - - - - -	Quality Checks:
6	A6_JAG1	0.0275423	0.290402	4	2.69071e-08	1.73159	0.999425	0.145	28.2309	1.03448	not_named	1.80542	120min mixed - c4	8.27766e-09	1 0 3	- - - - - 5 6 - - - - - - -	0: passed all checks
7	A7_JAG1	0.0275423	0.290402	4	2.9466e-09	1.81815	0.999125	0.145	29.6271	1.10584	not_named	1.80542	120min mixed -m3	3.62811e-09	1 2 3	0 - - - - - - - - - - - - -	1: no amplification
8	A8_JAG1	0.0275423	0.290402	5	5.88806e-08	1.65685	0.991823	0.145	29.1469	1.10392	not_named	1.80542	120min mixed -m3	4.81815e-09	0 0 3	- - 2 - - 5 6 - - 9 - - - -	2: baseline error
9	A9_JAG1	0.0275423	0.290402	4	3.35434e-09	1.82003	0.998949	0.145	29.3595	1.13531	not_named	1.80542	120min mixed -m3	4.24938e-09	1 2 3	0 - - - - - - - - - - - - -	3: no plateau
10	A10_JAG1	0.0275423	0.290402	4	2.28825e-09	1.83646	0.998218	0.145	29.5547	1.10218	not_named	1.80542	120min mixed -m4	3.7867e-09	1 2 3	0 - - - - - - - - - - - - -	4: noisy sample
11	A11_JAG1	0.0275423	0.290402	4	3.38656e-09	1.81984	0.999264	0.145	29.3486	1.13254	not_named	1.80542	120min mixed -m4	4.27703e-09	1 2 3	0 - - - - - - - - - - - - -	5: PCR efficiency outside 5%
12	A12_JAG1	0.0275423	0.290402	4	4.06761e-09	1.78749	0.998542	0.145	29.9394	1.03459	not_named	1.80542	120min mixed -m4	3.01684e-09	1 2 3	0 - - - - - - - - - - - - -	6: excluded from mean Eff
13	B1_JAG1	0.0275423	0.290402	4	1.43466e-09	1.91021	0.996878	0.145	28.478	1.04331	not_named	1.80542	120min random - c3	7.15349e-09	1 0 3	- - - - - 5 6 - - - - - - -	7: excluded by user
14	B2_JAG1	0.0275423	0.290402	4	6.47158e-09	1.86169	0.991477	0.145	27.233	1.12306	not_named	1.80542	120min random - c3	1.49262e-08	1 0 3	- - - - - 5 6 - - - - - - -	8: included by user
15	B3_JAG1	0.0275423	0.290402	3	7.4113e-09	1.84898	0.999999	0.145	27.3157	1.09505	not_named	1.80542	120min random - c3	1.42143e-08	1 2 3	0 - - - - - - - - - - - - -	9: manual baseline
16	B4_JAG1	0.0275423	0.290402	4	7.58736e-08	1.7158	0.999815	0.145	26.7898	1.09172	not_named	1.80542	120min random - c4	1.93945e-08	1 0 3	- - - - - 5 6 - - - - - - -
17	B5_JAG1	0.0275423	0.290402	4	3.76356e-08	1.7636	0.999972	0.145	26.7281	1.11512	not_named	1.80542	120min random - c4	2.01144e-08	1 2 3	0 - - - - - - - - - - - - -	if amplicon groups are defined the rules are applied per group
18	B6_JAG1	0.0275423	0.290402	5	3.13828e-08	1.77014	0.999149	0.145	26.8727	1.11206	not_named	1.80542	120min random - c4	1.84664e-08	1 2 3	0 - - - - - - - - - - - - -
19	B7_JAG1	0.0275423	0.290402	4	5.39867e-08	1.67937	0.999414	0.145	28.5552	1.10757	not_named	1.80542	120min random -m3	6.83421e-09	0 0 3	- - 2 - - 5 6 - - 9 - - - -	User Choices:
20	B8_JAG1	0.0275423	0.290402	4	3.05572e-09	1.80763	0.997726	0.145	29.8561	1.13878	not_named	1.80542	120min random -m3	3.169e-09	1 2 3	0 - - - - - - - - - - - - -
21	B9_JAG1	0.0275423	0.290402	4	2.21576e-10	2.00158	0.993295	0.145	29.2522	1.14438	not_named	1.80542	120min random -m3	4.5275e-09	0 0 3	- - 2 - - 5 6 - - 9 - - - -	Calculation of Mean Efficiency:
22	B10_JAG1	0.0275423	0.290402	4	3.46738e-09	1.79116	0.996509	0.145	30.1079	1.13763	not_named	1.80542	120min random -m4	2.73091e-09	1 2 3	0 - - - - - - - - - - - - -	exclude <no plateau> samples
23	B11_JAG1	0.0275423	0.290402	4	2.38822e-09	1.7916	0.9981	0.145	30.7349	1.11888	not_named	1.80542	120min random -m4	1.88558e-09	1 2 3	0 - - - - - - - - - - - - -	exclude <efficiency outlier> samples
24	B12_JAG1	0.0275423	0.290402	3	1.20675e-09	1.8708	0.999589	0.145	29.7019	1.13921	not_named	1.80542	120min random -m4	3.47131e-09	1 0 3	- - - - - 5 6 - - - - - - -	efficiency outlier defined as >5% from group median
																	Baseline Estimation:
																	log-linear phase criterion: strictly continuous Log-linear phase

## Sheet: Sample Setup
Block Type	96well
Chemistry	TAQMAN
Experiment File Name	C:\Users\11193327\Dropbox\Sami\Sams Tech Paper 2015\Figures\Figure 3\Final\JAG1\SK_11112015_No3_Final Figure.eds
Experiment Run End Time	Not Started
Instrument Type	steponeplus
Passive Reference	ROX
Well	Sample Name	Sample Color	Biogroup Name	Biogroup Color	Target Name	Target Color	Task	Reporter	Quencher	Comments
A1	120min mixed - c3	RGB(132,193,241)			JAG1	RGB(139,189,249)	UNKNOWN	FAM	NFQ-MGB
A2	120min mixed - c3	RGB(132,193,241)			JAG1	RGB(139,189,249)	UNKNOWN	FAM	NFQ-MGB
A3	120min mixed - c3	RGB(132,193,241)			JAG1	RGB(139,189,249)	UNKNOWN	FAM	NFQ-MGB
A4	120min mixed - c4	RGB(132,193,241)			JAG1	RGB(139,189,249)	UNKNOWN	FAM	NFQ-MGB
A5	120min mixed - c4	RGB(132,193,241)			JAG1	RGB(139,189,249)	UNKNOWN	FAM	NFQ-MGB
A6	120min mixed - c4	RGB(132,193,241)			JAG1	RGB(139,189,249)	UNKNOWN	FAM	NFQ-MGB
A7	120min mixed -m3	RGB(132,193,241)			JAG1	RGB(139,189,249)	UNKNOWN	FAM	NFQ-MGB
A8	120min mixed -m3	RGB(132,193,241)			JAG1	RGB(139,189,249)	UNKNOWN	FAM	NFQ-MGB
A9	120min mixed -m3	RGB(132,193,241)			JAG1	RGB(139,189,249)	UNKNOWN	FAM	NFQ-MGB
A10	120min mixed -m4	RGB(132,193,241)			JAG1	RGB(139,189,249)	UNKNOWN	FAM	NFQ-MGB
A11	120min mixed -m4	RGB(132,193,241)			JAG1	RGB(139,189,249)	UNKNOWN	FAM	NFQ-MGB
A12	120min mixed -m4	RGB(132,193,241)			JAG1	RGB(139,189,249)	UNKNOWN	FAM	NFQ-MGB
B1	120min random - c3	RGB(168,255,222)			JAG1	RGB(139,189,249)	UNKNOWN	FAM	NFQ-MGB
B2	120min random - c3	RGB(168,255,222)			JAG1	RGB(139,189,249)	UNKNOWN	FAM	NFQ-MGB
B3	120min random - c3	RGB(168,255,222)			JAG1	RGB(139,189,249)	UNKNOWN	FAM	NFQ-MGB
B4	120min random - c4	RGB(168,255,222)			JAG1	RGB(139,189,249)	UNKNOWN	FAM	NFQ-MGB
B5	120min random - c4	RGB(168,255,222)			JAG1	RGB(139,189,249)	UNKNOWN	FAM	NFQ-MGB
B6	120min random - c4	RGB(168,255,222)			JAG1	RGB(139,189,249)	UNKNOWN	FAM	NFQ-MGB
B7	120min random -m3	RGB(168,255,222)			JAG1	RGB(139,189,249)	UNKNOWN	FAM	NFQ-MGB
B8	120min random -m3	RGB(168,255,222)			JAG1	RGB(139,189,249)	UNKNOWN	FAM	NFQ-MGB
B9	120min random -m3	RGB(168,255,222)			JAG1	RGB(139,189,249)	UNKNOWN	FAM	NFQ-MGB
B10	120min random -m4	RGB(168,255,222)			JAG1	RGB(139,189,249)	UNKNOWN	FAM	NFQ-MGB
B11	120min random -m4	RGB(168,255,222)			JAG1	RGB(139,189,249)	UNKNOWN	FAM	NFQ-MGB
B12	120min random -m4	RGB(168,255,222)			JAG1	RGB(139,189,249)	UNKNOWN	FAM	NFQ-MGB

## Sheet: Results
Block Type	96well
Chemistry	TAQMAN
Experiment File Name	C:\Users\11193327\Dropbox\Sami\Sams Tech Paper 2015\Figures\Figure 3\Final\JAG1\SK_11112015_No3_Final Figure.eds
Experiment Run End Time	Not Started
Instrument Type	steponeplus
Passive Reference	ROX
Well	Sample Name	Target Name	Task	Reporter	Quencher	RQ	RQ Min	RQ Max	Cт	Cт Mean	Cт SD	ΔCт	ΔCт Mean	ΔCт SE	HK Control ΔCт Mean	HK Control ΔCт SE	ΔΔCт	Automatic Ct Threshold	Ct Threshold	Automatic Baseline	Baseline Start	Baseline End	Efficiency	Comments	HIGHSD
A1	120min mixed	JAG1	UNKNOWN	FAM	NFQ-MGB				28.9154	30.0238	0.753785							FALSE	0.314577	FALSE	1	1	1		Y
A2	120min mixed	JAG1	UNKNOWN	FAM	NFQ-MGB				29.4498	30.0238	0.753785							FALSE	0.314577	FALSE	1	1	1		Y
A3	120min mixed	JAG1	UNKNOWN	FAM	NFQ-MGB				29.0842	30.0238	0.753785							FALSE	0.314577	FALSE	1	1	1		Y
A4	120min mixed	JAG1	UNKNOWN	FAM	NFQ-MGB				29.7672	30.0238	0.753785							FALSE	0.314577	FALSE	1	1	1		Y
A5	120min mixed	JAG1	UNKNOWN	FAM	NFQ-MGB				29.3686	30.0238	0.753785							FALSE	0.314577	FALSE	1	1	1		Y
A6	120min mixed	JAG1	UNKNOWN	FAM	NFQ-MGB				29.5232	30.0238	0.753785							FALSE	0.314577	FALSE	1	1	1		Y
A7	120min mixed	JAG1	UNKNOWN	FAM	NFQ-MGB				30.811	30.0238	0.753785							FALSE	0.314577	FALSE	1	1	1		Y
A8	120min mixed	JAG1	UNKNOWN	FAM	NFQ-MGB				30.4408	30.0238	0.753785							FALSE	0.314577	FALSE	1	1	1		Y
A9	120min mixed	JAG1	UNKNOWN	FAM	NFQ-MGB				30.5788	30.0238	0.753785							FALSE	0.314577	FALSE	1	1	1		Y
A10	120min mixed	JAG1	UNKNOWN	FAM	NFQ-MGB				30.6736	30.0238	0.753785							FALSE	0.314577	FALSE	1	1	1		Y
A11	120min mixed	JAG1	UNKNOWN	FAM	NFQ-MGB				30.5065	30.0238	0.753785							FALSE	0.314577	FALSE	1	1	1		Y
A12	120min mixed	JAG1	UNKNOWN	FAM	NFQ-MGB				31.1669	30.0238	0.753785							FALSE	0.314577	FALSE	1	1	1		Y
B1	120min random	JAG1	UNKNOWN	FAM	NFQ-MGB				29.642	29.7187	1.41688							FALSE	0.314577	FALSE	1	1	1		Y
B2	120min random	JAG1	UNKNOWN	FAM	NFQ-MGB				28.622	29.7187	1.41688							FALSE	0.314577	FALSE	1	1	1		Y
B3	120min random	JAG1	UNKNOWN	FAM	NFQ-MGB				28.5061	29.7187	1.41688							FALSE	0.314577	FALSE	1	1	1		Y
B4	120min random	JAG1	UNKNOWN	FAM	NFQ-MGB				28.082	29.7187	1.41688							FALSE	0.314577	FALSE	1	1	1		Y
B5	120min random	JAG1	UNKNOWN	FAM	NFQ-MGB				28.0183	29.7187	1.41688							FALSE	0.314577	FALSE	1	1	1		Y
B6	120min random	JAG1	UNKNOWN	FAM	NFQ-MGB				28.1678	29.7187	1.41688							FALSE	0.314577	FALSE	1	1	1		Y
B7	120min random	JAG1	UNKNOWN	FAM	NFQ-MGB				29.9579	29.7187	1.41688							FALSE	0.314577	FALSE	1	1	1		Y
B8	120min random	JAG1	UNKNOWN	FAM	NFQ-MGB				31.0477	29.7187	1.41688							FALSE	0.314577	FALSE	1	1	1		Y
B9	120min random	JAG1	UNKNOWN	FAM	NFQ-MGB				30.3319	29.7187	1.41688							FALSE	0.314577	FALSE	1	1	1		Y
B10	120min random	JAG1	UNKNOWN	FAM	NFQ-MGB				31.4504	29.7187	1.41688							FALSE	0.314577	FALSE	1	1	1		Y
B11	120min random	JAG1	UNKNOWN	FAM	NFQ-MGB				31.9386	29.7187	1.41688							FALSE	0.314577	FALSE	1	1	1		Y
B12	120min random	JAG1	UNKNOWN	FAM	NFQ-MGB				30.8599	29.7187	1.41688							FALSE	0.314577	FALSE	1	1	1		Y
C1		JAG1	NTC	FAM	NFQ-MGB				Undetermined									FALSE	0.314577	FALSE	1	1	1		N
C2		JAG1	NTC	FAM	NFQ-MGB				Undetermined									FALSE	0.314577	FALSE	1	1	1		N
C3		JAG1	NTC	FAM	NFQ-MGB				Undetermined									FALSE	0.314577	FALSE	1	1	1		N
Analysis Type	Singleplex
Endogenous Control	JAG1
RQ Min/Max Confidence Level	95.0
Reference Sample	120min mixed

## Sheet: Raw Data
Block Type	96well
Chemistry	TAQMAN
Experiment File Name	C:\Users\11193327\Dropbox\Sami\Sams Tech Paper 2015\Figures\Figure 3\Final\JAG1\SK_11112015_No3_Final Figure.eds
Experiment Run End Time	Not Started
Instrument Type	steponeplus
Passive Reference	ROX
Well	Cycle	BLUE	GREEN	YELLOW	RED
A1	1	12329.7	5470.2	4253	6210.5
A2	1	12070.6	5255	3992.6	5800
A3	1	13848.3	6063.7	4602.7	6464.4
A4	1	10017.8	4303.7	3320.7	4774.9
A5	1	12334.5	5280.5	3993.2	5733.3
A6	1	12088.3	5214.6	4079.2	5930
A7	1	12970.3	5627.7	4263.7	6053.9
A8	1	12708.8	5479.1	4156.9	5884.4
A9	1	13127.9	5626.9	4226	5973.8
A10	1	13097.7	5658	4328.1	6129.4
A11	1	12988.4	5537.4	4184.3	5943.4
A12	1	13280.1	5709	4426.3	6511.5
B1	1	10562.4	4578.7	3536.9	5183
B2	1	13496.9	5752.1	4281.4	6091.4
B3	1	12108.2	5150.5	3943	5638.9
B4	1	12236	5222.1	3980	5689.6
B5	1	12018.5	5083.8	3866.8	5497.9
B6	1	14170.4	6053.6	4573.3	6494.7
B7	1	12598.2	5371	4085.1	5768.9
B8	1	14078.4	6005.9	4509.5	6365.1
B9	1	12071.8	5096.5	3844.1	5450.7
B10	1	12958.5	5414.4	4069.3	5779.4
B11	1	12177.2	5170.9	3892.9	5550.9
B12	1	14318.9	6299.9	4689.9	6524.9
C1	1	14280.5	6243.6	4854.6	6991.2
C2	1	9013.5	3806.5	2981.4	4410.9
C3	1	10920	4645.5	3537.4	5049
C4	1	-1006.4	-705.102	-499.398	-470.398
C5	1	-942.699	-652.801	-464.301	-450.699
C6	1	-1143.2	-777.102	-556.398	-525
C7	1	-858.199	-579.301	-415.602	-374
C8	1	-1252	-860.301	-618.602	-579.102
C9	1	-926.602	-634	-460.199	-434.301
C10	1	-1114	-776	-533.801	-491.898
C11	1	-1052.1	-709	-510.199	-420
C12	1	-1156.8	-760.199	-517.102	-462.801
D1	1	-1253.4	-860.898	-608.398	-581.199
D2	1	-874.602	-599.199	-438.398	-393.5
D3	1	-1218.9	-821.102	-576.102	-539.602
D4	1	-1024.8	-697.699	-503.5	-477.898
D5	1	-1131.4	-768.102	-559.102	-519.699
D6	1	-956.898	-676.5	-479.301	-441.301
D7	1	-1160	-790.801	-546.301	-517.398
D8	1	-1028.9	-706.102	-503.5	-468.801
D9	1	-1244.9	-875.5	-660.398	-745.398
D10	1	-1136.9	-781.602	-553.199	-501.5
D11	1	-1144.1	-775	-559.398	-493.398
D12	1	-958.199	-644	-454.898	-407.898
E1	1	-983.5	-682.801	-489	-457
E2	1	-1208.5	-830.602	-604.801	-564
E3	1	-982.199	-663.801	-490	-460.5
E4	1	-1124.2	-770.699	-555.398	-484.102
E5	1	-953.602	-663.398	-487.801	-456
E6	1	-1139.3	-792.5	-567.5	-536.898
E7	1	-1126.1	-762.5	-565.898	-529.801
E8	1	-1193.8	-828.5	-574.602	-522.5
E9	1	-1014.9	-694.102	-513	-483.898
E10	1	-931.801	-629.102	-441.301	-422.199
E11	1	-1103.7	-751	-525.398	-481.898
E12	1	-1141.5	-743.602	-526.301	-488.801
F1	1	-1195.2	-823.102	-597.801	-564.398
F2	1	-962.102	-677.102	-477.102	-449.5
F3	1	-1048.3	-718.801	-524.801	-482.699
F4	1	-1040.5	-737	-534.602	-480.398
F5	1	-1138.2	-794.699	-575.5	-532.5
F6	1	-1056.8	-722.801	-530.801	-468.898
F7	1	-1199.7	-835	-587.801	-544.5
F8	1	-1062.1	-713.801	-524.102	-484
F9	1	-1179.7	-811.699	-572.102	-527.102
F10	1	-883	-594.898	-395.398	-346.102
F11	1	-1085.9	-735.199	-516.301	-474.102
F12	1	-1034.1	-658.102	-451.398	-398.898
G1	1	-984.102	-679.102	-476.699	-460.801
G2	1	-1024.3	-710.199	-514.199	-490.898
G3	1	-1167.3	-794.102	-573.102	-540.699
G4	1	-939.801	-635.102	-458.699	-430.301
G5	1	-991.398	-690.5	-502	-452.602
G6	1	-1217.9	-847.898	-584.5	-561.898
G7	1	-1037.1	-717.102	-517	-494.5
G8	1	-1247.4	-848	-603.301	-560.398
G9	1	-1086.4	-733.102	-517.398	-484.301
G10	1	-1090.7	-714.102	-519	-463.699
G11	1	-1180.1	-798.699	-562	-543.898
G12	1	-1044.6	-685.801	-483.898	-451.199
H1	1	-1091	-735.5	-534.699	-492.898
H2	1	-963.602	-666.301	-466.699	-443.699
H3	1	-1202.5	-824.602	-583.602	-569
H4	1	-965.801	-656.602	-479.199	-435.898
H5	1	-1055.4	-727	-513.699	-485.5
H6	1	-817.102	-548.898	-402.102	-377
H7	1	-1199.7	-812.199	-570.801	-530.699
H8	1	-903.398	-616.301	-441.398	-392.102
H9	1	-1108.9	-746	-518.602	-482.199
H10	1	-911.699	-611.699	-453.102	-415.602
H11	1	-1215.5	-818.898	-566.5	-534
H12	1	-1245.9	-809	-577.5	-500.801
A1	2	12647.7	5606.2	4356	6332.5
A2	2	12492.6	5435	4141.6	5994
A3	2	14076.3	6174.7	4665.7	6570.4
A4	2	10138.8	4326.7	3334.7	4789.9
A5	2	12602.5	5400.5	4078.2	5848.3
A6	2	12256.3	5268.6	4109.2	5995
A7	2	13230.3	5747.7	4345.7	6141.9
A8	2	12881.8	5530.1	4174.9	5927.4
A9	2	13340.9	5709.9	4288	6067.8
A10	2	13307.7	5733	4369.1	6177.4
A11	2	13121.4	5581.4	4203.3	5936.4
A12	2	13371.1	5731	4435.3	6538.5
B1	2	10597.4	4590.7	3556.9	5182
B2	2	13522.9	5787.1	4328.4	6166.4
B3	2	11958.2	5086.5	3885	5558.9
B4	2	12525	5374.1	4102	5840.6
B5	2	12033.5	5114.8	3895.8	5507.9
B6	2	14161.4	6058.6	4577.3	6516.7
B7	2	12556.2	5371	4082.1	5761.9
B8	2	13895.4	5966.9	4462.5	6312.1
B9	2	12056.8	5087.5	3844.1	5442.7
B10	2	12775.5	5362.4	4034.3	5732.4
B11	2	12009.2	5120.9	3851.9	5474.9
B12	2	14512.9	6373.9	4737.9	6569.9
C1	2	14584.5	6404.6	4933.6	7088.2
C2	2	9013.5	3813.5	2971.4	4372.9
C3	2	10748	4565.5	3484.4	4952
C4	2	-1004.4	-709.102	-513.398	-465.398
C5	2	-891.699	-625.801	-444.301	-435.699
C6	2	-1108.2	-762.102	-542.398	-526
C7	2	-814.199	-563.301	-401.602	-365
C8	2	-1239	-855.301	-605.602	-562.102
C9	2	-905.602	-621	-449.199	-403.301
C10	2	-1118	-771	-540.801	-488.898
C11	2	-1017.1	-676	-478.199	-410
C12	2	-1149.8	-750.199	-510.102	-451.801
D1	2	-1241.4	-857.898	-604.398	-568.199
D2	2	-842.602	-598.199	-424.398	-401.5
D3	2	-1194.9	-806.102	-580.102	-529.602
D4	2	-991.801	-681.699	-500.5	-457.898
D5	2	-1122.4	-774.102	-555.102	-520.699
D6	2	-933.898	-652.5	-451.301	-431.301
D7	2	-1164	-784.801	-548.301	-499.398
D8	2	-1002.9	-685.102	-493.5	-476.801
D9	2	-1241.9	-855.5	-654.398	-746.398
D10	2	-1100.9	-748.602	-536.199	-500.5
D11	2	-1126.1	-749	-531.398	-493.398
D12	2	-911.199	-597	-437.898	-397.898
E1	2	-932.5	-667.801	-464	-411
E2	2	-1211.5	-840.602	-608.801	-557
E3	2	-934.199	-667.801	-461	-437.5
E4	2	-1111.2	-763.699	-551.398	-469.102
E5	2	-918.602	-631.398	-472.801	-440
E6	2	-1151.3	-788.5	-562.5	-542.898
E7	2	-1105.1	-763.5	-560.898	-526.801
E8	2	-1177.8	-803.5	-556.602	-516.5
E9	2	-968.898	-680.102	-492	-462.898
E10	2	-892.801	-599.102	-428.301	-406.199
E11	2	-1094.7	-731	-521.398	-474.898
E12	2	-1113.5	-725.602	-520.301	-488.801
F1	2	-1183.2	-799.102	-586.801	-562.398
F2	2	-952.102	-660.102	-474.102	-447.5
F3	2	-1050.3	-719.801	-504.801	-473.699
F4	2	-1035.5	-712	-516.602	-481.398
F5	2	-1154.2	-801.699	-576.5	-549.5
F6	2	-1036.8	-705.801	-506.801	-460.898
F7	2	-1189.7	-815	-573.801	-537.5
F8	2	-1032.1	-692.801	-514.102	-475
F9	2	-1155.7	-787.699	-559.102	-525.102
F10	2	-832	-553.898	-389.398	-337.102
F11	2	-1082.9	-735.199	-517.301	-480.102
F12	2	-1011.1	-631.102	-424.398	-388.898
G1	2	-948.102	-653.102	-484.699	-439.801
G2	2	-986.301	-684.199	-491.199	-472.898
G3	2	-1140.3	-778.102	-564.102	-535.699
G4	2	-916.801	-620.102	-448.699	-416.301
G5	2	-982.398	-667.5	-482	-446.602
G6	2	-1206.9	-847.898	-605.5	-549.898
G7	2	-1023.1	-702.102	-523	-473.5
G8	2	-1246.4	-861	-612.301	-560.398
G9	2	-1066.4	-727.102	-527.398	-472.301
G10	2	-1068.7	-700.102	-518	-472.699
G11	2	-1164.1	-776.699	-565	-527.898
G12	2	-1039.6	-686.801	-471.898	-451.199
H1	2	-1078	-739.5	-524.699	-476.898
H2	2	-941.602	-632.301	-462.699	-420.699
H3	2	-1205.5	-808.602	-603.602	-556
H4	2	-925.801	-640.602	-455.199	-419.898
H5	2	-1049.4	-721	-531.699	-489.5
H6	2	-774.102	-530.898	-379.102	-346
H7	2	-1186.7	-810.199	-588.801	-521.699
H8	2	-868.398	-596.301	-433.398	-374.102
H9	2	-1089.9	-737	-511.602	-484.199
H10	2	-877.699	-590.699	-442.102	-404.602
H11	2	-1215.5	-800.898	-556.5	-528
H12	2	-1236.9	-815	-561.5	-497.801
A1	3	12862.7	5670.2	4403	6371.5
A2	3	12762.6	5536	4215.6	6102
A3	3	14353.3	6274.7	4745.7	6658.4
A4	3	10307.8	4397.7	3386.7	4848.9
A5	3	12741.5	5434.5	4109.2	5868.3
A6	3	12503.3	5381.6	4192.2	6073
A7	3	13519.3	5860.7	4421.7	6233.9
A8	3	12995.8	5585.1	4217.9	5975.4
A9	3	13526.9	5797.9	4339	6119.8
A10	3	13511.7	5826	4424.1	6252.4
A11	3	13306.4	5645.4	4232.3	5989.4
A12	3	13623.1	5853	4515.3	6644.5
B1	3	10809.4	4680.7	3614.9	5268
B2	3	13649.9	5838.1	4373.4	6225.4
B3	3	11989.2	5117.5	3899	5575.9
B4	3	12645	5422.1	4136	5887.6
B5	3	12022.5	5093.8	3858.8	5459.9
B6	3	14269.4	6119.6	4608.3	6544.7
B7	3	12611.2	5377	4092.1	5771.9
B8	3	14099.4	6068.9	4530.5	6395.1
B9	3	12125.8	5113.5	3862.1	5468.7
B10	3	12817.5	5371.4	4033.3	5740.4
B11	3	12067.2	5135.9	3865.9	5481.9
B12	3	14595.9	6382.9	4732.9	6558.9
C1	3	14764.5	6462.6	4965.6	7137.2
C2	3	9051.5	3824.5	2975.4	4399.9
C3	3	10844	4604.5	3518.4	4997
C4	3	-986.398	-699.102	-490.398	-455.398
C5	3	-858.699	-584.801	-436.301	-423.699
C6	3	-1112.2	-759.102	-552.398	-520
C7	3	-763.199	-540.301	-363.602	-362
C8	3	-1224	-844.301	-604.602	-553.102
C9	3	-910.602	-616	-447.199	-419.301
C10	3	-1101	-758	-535.801	-487.898
C11	3	-974.102	-666	-450.199	-405
C12	3	-1138.8	-745.199	-492.102	-445.801
D1	3	-1234.4	-851.898	-606.398	-561.199
D2	3	-820.602	-567.199	-407.398	-378.5
D3	3	-1191.9	-816.102	-550.102	-544.602
D4	3	-953.801	-657.699	-479.5	-444.898
D5	3	-1105.4	-763.102	-558.102	-512.699
D6	3	-893.898	-627.5	-451.301	-435.301
D7	3	-1149	-781.801	-550.301	-504.398
D8	3	-968.898	-652.102	-486.5	-454.801
D9	3	-1223.9	-859.5	-645.398	-736.398
D10	3	-1090.9	-733.602	-530.199	-483.5
D11	3	-1125.1	-739	-527.398	-474.398
D12	3	-890.199	-587	-423.898	-398.898
E1	3	-921.5	-620.801	-470	-406
E2	3	-1193.5	-812.602	-591.801	-566
E3	3	-937.199	-640.801	-453	-429.5
E4	3	-1099.2	-754.699	-540.398	-474.102
E5	3	-878.602	-606.398	-453.801	-424
E6	3	-1128.3	-777.5	-555.5	-522.898
E7	3	-1087.1	-717.5	-540.898	-512.801
E8	3	-1153.8	-804.5	-569.602	-515.5
E9	3	-939.898	-659.102	-459	-433.898
E10	3	-851.801	-604.102	-403.301	-402.199
E11	3	-1081.7	-732	-524.398	-472.898
E12	3	-1115.5	-722.602	-521.301	-468.801
F1	3	-1178.2	-807.102	-582.801	-539.398
F2	3	-931.102	-634.102	-470.102	-428.5
F3	3	-1035.3	-700.801	-525.801	-477.699
F4	3	-1007.5	-695	-503.602	-455.398
F5	3	-1119.2	-777.699	-569.5	-534.5
F6	3	-1013.8	-709.801	-521.801	-483.898
F7	3	-1182.7	-798	-580.801	-547.5
F8	3	-1011.1	-689.801	-505.102	-465
F9	3	-1116.7	-753.699	-539.102	-496.102
F10	3	-798	-521.898	-360.398	-315.102
F11	3	-1080.9	-721.199	-507.301	-475.102
F12	3	-1017.1	-634.102	-418.398	-383.898
G1	3	-942.102	-645.102	-469.699	-449.801
G2	3	-971.301	-677.199	-488.199	-463.898
G3	3	-1120.3	-765.102	-572.102	-526.699
G4	3	-898.801	-619.102	-459.699	-418.301
G5	3	-960.398	-671.5	-486	-438.602
G6	3	-1199.9	-831.898	-597.5	-549.898
G7	3	-995.102	-682.102	-498	-474.5
G8	3	-1257.4	-838	-610.301	-541.398
G9	3	-1047.4	-709.102	-505.398	-475.301
G10	3	-1025.7	-688.102	-492	-467.699
G11	3	-1155.1	-774.699	-554	-501.898
G12	3	-1012.6	-671.801	-486.898	-443.199
H1	3	-1067	-714.5	-512.699	-473.898
H2	3	-895.602	-619.301	-458.699	-421.699
H3	3	-1186.5	-816.602	-590.602	-568
H4	3	-914.801	-624.602	-436.199	-405.898
H5	3	-1048.4	-718	-522.699	-474.5
H6	3	-747.102	-514.898	-377.102	-370
H7	3	-1186.7	-812.199	-572.801	-515.699
H8	3	-854.398	-571.301	-421.398	-374.102
H9	3	-1073.9	-730	-509.602	-480.199
H10	3	-837.699	-570.699	-424.102	-397.602
H11	3	-1202.5	-805.898	-573.5	-523
H12	3	-1224.9	-797	-561.5	-491.801
A1	4	12939.7	5739.2	4446	6432.5
A2	4	12886.6	5574	4240.6	6140
A3	4	14448.3	6322.7	4747.7	6689.4
A4	4	10398.8	4429.7	3403.7	4861.9
A5	4	12910.5	5521.5	4171.2	5935.3
A6	4	12643.3	5424.6	4210.2	6112
A7	4	13602.3	5901.7	4447.7	6257.9
A8	4	13134.8	5636.1	4242.9	6012.4
A9	4	13543.9	5789.9	4339	6098.8
A10	4	13666.7	5864	4454.1	6294.4
A11	4	13387.4	5694.4	4254.3	6003.4
A12	4	13626.1	5844	4515.3	6623.5
B1	4	10802.4	4673.7	3575.9	5237
B2	4	13672.9	5833.1	4351.4	6210.4
B3	4	12048.2	5128.5	3917	5588.9
B4	4	12690	5458.1	4135	5880.6
B5	4	12187.5	5178.8	3910.8	5543.9
B6	4	14342.4	6154.6	4637.3	6577.7
B7	4	12718.2	5426	4125.1	5827.9
B8	4	14138.4	6067.9	4534.5	6384.1
B9	4	12202.8	5187.5	3901.1	5517.7
B10	4	12886.5	5427.4	4055.3	5759.4
B11	4	12038.2	5120.9	3843.9	5457.9
B12	4	14753.9	6453.9	4787.9	6619.9
C1	4	14854.5	6511.6	5015.6	7169.2
C2	4	9119.5	3856.5	3003.4	4422.9
C3	4	10853	4608.5	3524.4	4966
C4	4	-980.398	-680.102	-500.398	-459.398
C5	4	-838.699	-576.801	-420.301	-397.699
C6	4	-1105.2	-773.102	-546.398	-511
C7	4	-729.199	-532.301	-385.602	-360
C8	4	-1218	-829.301	-594.602	-571.102
C9	4	-897.602	-615	-442.199	-412.301
C10	4	-1098	-754	-523.801	-472.898
C11	4	-951.102	-624	-439.199	-391
C12	4	-1122.8	-733.199	-496.102	-447.801
D1	4	-1227.4	-856.898	-608.398	-570.199
D2	4	-792.602	-560.199	-410.398	-400.5
D3	4	-1184.9	-812.102	-568.102	-539.602
D4	4	-921.801	-647.699	-470.5	-454.898
D5	4	-1094.4	-763.102	-557.102	-514.699
D6	4	-882.898	-607.5	-442.301	-427.301
D7	4	-1149	-774.801	-541.301	-508.398
D8	4	-940.898	-657.102	-478.5	-460.801
D9	4	-1218.9	-852.5	-638.398	-738.398
D10	4	-1051.9	-716.602	-506.199	-469.5
D11	4	-1120.1	-739	-529.398	-484.398
D12	4	-854.199	-567	-395.898	-378.898
E1	4	-865.5	-628.801	-439	-388
E2	4	-1175.5	-816.602	-592.801	-553
E3	4	-892.199	-615.801	-446	-434.5
E4	4	-1089.2	-750.699	-531.398	-469.102
E5	4	-853.602	-597.398	-442.801	-421
E6	4	-1113.3	-785.5	-538.5	-522.898
E7	4	-1047.1	-725.5	-529.898	-503.801
E8	4	-1147.8	-810.5	-559.602	-501.5
E9	4	-915.898	-633.102	-454	-439.898
E10	4	-840.801	-581.102	-410.301	-362.199
E11	4	-1062.7	-710	-524.398	-483.898
E12	4	-1060.5	-693.602	-511.301	-465.801
F1	4	-1145.2	-791.102	-567.801	-538.398
F2	4	-906.102	-628.102	-461.102	-439.5
F3	4	-1018.3	-703.801	-513.801	-473.699
F4	4	-986.5	-671	-493.602	-469.398
F5	4	-1112.2	-773.699	-563.5	-532.5
F6	4	-989.801	-689.801	-489.801	-467.898
F7	4	-1164.7	-809	-563.801	-517.5
F8	4	-993.102	-671.801	-492.102	-466
F9	4	-1075.7	-740.699	-515.102	-500.102
F10	4	-767	-510.898	-365.398	-306.102
F11	4	-1068.9	-704.199	-507.301	-478.102
F12	4	-974.102	-613.102	-412.398	-353.898
G1	4	-899.102	-621.102	-459.699	-426.801
G2	4	-929.301	-660.199	-489.199	-455.898
G3	4	-1103.3	-754.102	-546.102	-518.699
G4	4	-882.801	-593.102	-438.699	-407.301
G5	4	-933.398	-646.5	-475	-428.602
G6	4	-1204.9	-833.898	-579.5	-542.898
G7	4	-973.102	-672.102	-481	-461.5
G8	4	-1230.4	-837	-590.301	-552.398
G9	4	-1033.4	-700.102	-493.398	-460.301
G10	4	-984.699	-685.102	-478	-443.699
G11	4	-1129.1	-756.699	-554	-528.898
G12	4	-986.602	-668.801	-473.898	-444.199
H1	4	-1053	-712.5	-497.699	-472.898
H2	4	-880.602	-603.301	-444.699	-420.699
H3	4	-1190.5	-825.602	-566.602	-550
H4	4	-886.801	-604.602	-425.199	-405.898
H5	4	-1046.4	-711	-514.699	-481.5
H6	4	-720.102	-494.898	-367.102	-355
H7	4	-1175.7	-791.199	-565.801	-521.699
H8	4	-825.398	-563.301	-432.398	-378.102
H9	4	-1038.9	-710	-492.602	-475.199
H10	4	-796.699	-558.699	-408.102	-391.602
H11	4	-1187.5	-803.898	-566.5	-523
H12	4	-1209.9	-795	-568.5	-491.801
A1	5	13156.7	5816.2	4465	6494.5
A2	5	12909.6	5583	4242.6	6125
A3	5	14516.3	6336.7	4782.7	6679.4
A4	5	10430.8	4451.7	3410.7	4875.9
A5	5	13003.5	5539.5	4180.2	5956.3
A6	5	12798.3	5516.6	4288.2	6199
A7	5	13700.3	5925.7	4484.7	6274.9
A8	5	13177.8	5659.1	4254.9	6024.4
A9	5	13698.9	5858.9	4382	6164.8
A10	5	13725.7	5886	4456.1	6282.4
A11	5	13467.4	5696.4	4273.3	6021.4
A12	5	13646.1	5857	4523.3	6625.5
B1	5	10927.4	4714.7	3629.9	5289
B2	5	13695.9	5843.1	4359.4	6206.4
B3	5	12047.2	5126.5	3908	5577.9
B4	5	12787	5482.1	4175	5924.6
B5	5	12269.5	5229.8	3969.8	5583.9
B6	5	14350.4	6151.6	4642.3	6544.7
B7	5	12774.2	5461	4123.1	5820.9
B8	5	14236.4	6105.9	4560.5	6413.1
B9	5	12268.8	5184.5	3895.1	5521.7
B10	5	12949.5	5430.4	4085.3	5779.4
B11	5	12036.2	5115.9	3848.9	5471.9
B12	5	14822.9	6486.9	4809.9	6612.9
C1	5	14970.5	6549.6	5034.6	7205.2
C2	5	9141.5	3870.5	2995.4	4428.9
C3	5	10910	4631.5	3522.4	4985
C4	5	-962.398	-659.102	-481.398	-426.398
C5	5	-791.699	-558.801	-414.301	-401.699
C6	5	-1109.2	-760.102	-553.398	-509
C7	5	-724.199	-503.301	-368.602	-342
C8	5	-1203	-823.301	-591.602	-564.102
C9	5	-855.602	-604	-433.199	-398.301
C10	5	-1072	-734	-509.801	-461.898
C11	5	-922.102	-622	-432.199	-387
C12	5	-1099.8	-734.199	-481.102	-425.801
D1	5	-1216.4	-846.898	-606.398	-565.199
D2	5	-752.602	-529.199	-397.398	-371.5
D3	5	-1170.9	-806.102	-564.102	-531.602
D4	5	-884.801	-609.699	-459.5	-430.898
D5	5	-1089.4	-750.102	-546.102	-501.699
D6	5	-840.898	-599.5	-442.301	-411.301
D7	5	-1133	-765.801	-542.301	-511.398
D8	5	-920.898	-629.102	-469.5	-439.801
D9	5	-1207.9	-849.5	-645.398	-748.398
D10	5	-1024.9	-703.602	-501.199	-461.5
D11	5	-1096.1	-739	-513.398	-464.398
D12	5	-829.199	-549	-403.898	-367.898
E1	5	-831.5	-608.801	-435	-380
E2	5	-1144.5	-799.602	-602.801	-560
E3	5	-867.199	-601.801	-437	-419.5
E4	5	-1072.2	-754.699	-535.398	-468.102
E5	5	-820.602	-574.398	-434.801	-398
E6	5	-1111.3	-754.5	-565.5	-532.898
E7	5	-1031.1	-711.5	-524.898	-500.801
E8	5	-1144.8	-778.5	-562.602	-501.5
E9	5	-897.898	-614.102	-448	-438.898
E10	5	-816.801	-549.102	-389.301	-367.199
E11	5	-1067.7	-724	-518.398	-472.898
E12	5	-1047.5	-683.602	-486.301	-461.801
F1	5	-1132.2	-782.102	-562.801	-546.398
F2	5	-880.102	-614.102	-433.102	-420.5
F3	5	-994.301	-697.801	-508.801	-477.699
F4	5	-957.5	-660	-462.602	-438.398
F5	5	-1117.2	-778.699	-560.5	-519.5
F6	5	-964.801	-679.801	-494.801	-462.898
F7	5	-1139.7	-787	-570.801	-532.5
F8	5	-974.102	-676.801	-480.102	-452
F9	5	-1053.7	-721.699	-508.102	-472.102
F10	5	-743	-482.898	-337.398	-299.102
F11	5	-1048.9	-697.199	-510.301	-472.102
F12	5	-980.102	-622.102	-404.398	-363.898
G1	5	-879.102	-612.102	-436.699	-419.801
G2	5	-902.301	-640.199	-487.199	-431.898
G3	5	-1085.3	-740.102	-533.102	-505.699
G4	5	-869.801	-589.102	-429.699	-393.301
G5	5	-923.398	-639.5	-472	-431.602
G6	5	-1186.9	-823.898	-577.5	-537.898
G7	5	-933.102	-671.102	-467	-457.5
G8	5	-1212.4	-833	-592.301	-543.398
G9	5	-1021.4	-697.102	-493.398	-456.301
G10	5	-970.699	-653.102	-469	-438.699
G11	5	-1105.1	-741.699	-536	-498.898
G12	5	-967.602	-651.801	-473.898	-424.199
H1	5	-1041	-715.5	-505.699	-464.898
H2	5	-844.602	-595.301	-432.699	-418.699
H3	5	-1156.5	-803.602	-587.602	-550
H4	5	-858.801	-588.602	-416.199	-402.898
H5	5	-1027.4	-705	-498.699	-475.5
H6	5	-683.102	-479.898	-348.102	-325
H7	5	-1173.7	-786.199	-571.801	-502.699
H8	5	-798.398	-531.301	-408.398	-367.102
H9	5	-1023.9	-701	-497.602	-456.199
H10	5	-754.699	-539.699	-412.102	-383.602
H11	5	-1174.5	-797.898	-562.5	-529
H12	5	-1203.9	-774	-544.5	-499.801
A1	6	13048.7	5756.2	4443	6457.5
A2	6	12912.6	5581	4238.6	6111
A3	6	14547.3	6354.7	4767.7	6703.4
A4	6	10450.8	4445.7	3414.7	4884.9
A5	6	13006.5	5530.5	4164.2	5942.3
A6	6	12687.3	5442.6	4237.2	6111
A7	6	13751.3	5967.7	4491.7	6290.9
A8	6	13241.8	5675.1	4270.9	6044.4
A9	6	13743.9	5868.9	4385	6179.8
A10	6	13794.7	5907	4488.1	6311.4
A11	6	13541.4	5735.4	4285.3	6051.4
A12	6	13762.1	5905	4563.3	6674.5
B1	6	10952.4	4728.7	3632.9	5298
B2	6	13727.9	5851.1	4365.4	6209.4
B3	6	12123.2	5176.5	3923	5610.9
B4	6	12924	5555.1	4208	5967.6
B5	6	12221.5	5187.8	3916.8	5534.9
B6	6	14492.4	6196.6	4660.3	6601.7
B7	6	12821.2	5485	4148.1	5846.9
B8	6	14216.4	6100.9	4559.5	6395.1
B9	6	12293.8	5186.5	3899.1	5488.7
B10	6	12994.5	5457.4	4088.3	5807.4
B11	6	12067.2	5131.9	3857.9	5467.9
B12	6	14787.9	6454.9	4776.9	6595.9
C1	6	15023.5	6565.6	5048.6	7238.2
C2	6	9202.5	3911.5	3034.4	4458.9
C3	6	11033	4703.5	3569.4	5036
C4	6	-938.398	-659.102	-474.398	-434.398
C5	6	-739.699	-529.801	-378.301	-387.699
C6	6	-1085.2	-741.102	-542.398	-501
C7	6	-686.199	-479.301	-347.602	-337
C8	6	-1193	-828.301	-589.602	-547.102
C9	6	-819.602	-560	-427.199	-397.301
C10	6	-1057	-722	-499.801	-470.898
C11	6	-887.102	-607	-430.199	-370
C12	6	-1098.8	-726.199	-475.102	-432.801
D1	6	-1193.4	-828.898	-602.398	-559.199
D2	6	-682.602	-505.199	-385.398	-351.5
D3	6	-1161.9	-800.102	-567.102	-524.602
D4	6	-852.801	-601.699	-435.5	-434.898
D5	6	-1067.4	-738.102	-550.102	-493.699
D6	6	-815.898	-580.5	-412.301	-403.301
D7	6	-1106	-769.801	-542.301	-500.398
D8	6	-888.898	-612.102	-461.5	-432.801
D9	6	-1190.9	-823.5	-632.398	-723.398
D10	6	-986.898	-677.602	-491.199	-460.5
D11	6	-1084.1	-742	-508.398	-469.398
D12	6	-783.199	-500	-377.898	-350.898
E1	6	-791.5	-559.801	-403	-367
E2	6	-1137.5	-768.602	-582.801	-536
E3	6	-828.199	-593.801	-435	-406.5
E4	6	-1050.2	-727.699	-513.398	-452.102
E5	6	-781.602	-568.398	-413.801	-393
E6	6	-1116.3	-756.5	-548.5	-538.898
E7	6	-1004.1	-676.5	-518.898	-481.801
E8	6	-1135.8	-769.5	-544.602	-485.5
E9	6	-871.898	-599.102	-440	-411.898
E10	6	-805.801	-545.102	-384.301	-364.199
E11	6	-1041.7	-713	-506.398	-483.898
E12	6	-1028.5	-673.602	-489.301	-464.801
F1	6	-1119.2	-775.102	-552.801	-531.398
F2	6	-849.102	-593.102	-440.102	-412.5
F3	6	-976.301	-679.801	-495.801	-475.699
F4	6	-914.5	-635	-465.602	-450.398
F5	6	-1121.2	-779.699	-559.5	-537.5
F6	6	-960.801	-670.801	-480.801	-456.898
F7	6	-1139.7	-791	-565.801	-516.5
F8	6	-958.102	-650.801	-473.102	-431
F9	6	-1037.7	-720.699	-503.102	-489.102
F10	6	-724	-487.898	-320.398	-282.102
F11	6	-1028.9	-679.199	-492.301	-469.102
F12	6	-942.102	-600.102	-395.398	-350.898
G1	6	-828.102	-587.102	-426.699	-415.801
G2	6	-879.301	-647.199	-450.199	-423.898
G3	6	-1047.3	-730.102	-535.102	-500.699
G4	6	-839.801	-589.102	-419.699	-407.301
G5	6	-911.398	-628.5	-452	-414.602
G6	6	-1180.9	-817.898	-589.5	-533.898
G7	6	-907.102	-641.102	-453	-446.5
G8	6	-1222.4	-826	-580.301	-530.398
G9	6	-996.398	-687.102	-484.398	-438.301
G10	6	-948.699	-650.102	-460	-440.699
G11	6	-1076.1	-726.699	-521	-486.898
G12	6	-950.602	-637.801	-462.898	-431.199
H1	6	-1042	-705.5	-507.699	-460.898
H2	6	-821.602	-575.301	-420.699	-407.699
H3	6	-1148.5	-787.602	-571.602	-548
H4	6	-811.801	-576.602	-401.199	-380.898
H5	6	-1027.4	-700	-507.699	-463.5
H6	6	-659.102	-457.898	-343.102	-335
H7	6	-1150.7	-779.199	-558.801	-525.699
H8	6	-768.398	-513.301	-385.398	-362.102
H9	6	-1015.9	-685	-488.602	-454.199
H10	6	-745.699	-519.699	-398.102	-373.602
H11	6	-1153.5	-788.898	-547.5	-518
H12	6	-1175.9	-776	-534.5	-494.801
A1	7	13192.7	5824.2	4489	6506.5
A2	7	12952.6	5595	4258.6	6125
A3	7	14546.3	6356.7	4792.7	6716.4
A4	7	10438.8	4429.7	3406.7	4862.9
A5	7	13055.5	5535.5	4179.2	5956.3
A6	7	12809.3	5500.6	4279.2	6183
A7	7	13747.3	5957.7	4473.7	6291.9
A8	7	13238.8	5665.1	4282.9	6055.4
A9	7	13744.9	5869.9	4389	6176.8
A10	7	13814.7	5918	4479.1	6322.4
A11	7	13652.4	5783.4	4310.3	6082.4
A12	7	13802.1	5922	4575.3	6671.5
B1	7	10933.4	4710.7	3615.9	5289
B2	7	13728.9	5878.1	4381.4	6211.4
B3	7	12114.2	5172.5	3935	5621.9
B4	7	12918	5546.1	4199	5964.6
B5	7	12331.5	5267.8	3966.8	5607.9
B6	7	14486.4	6209.6	4661.3	6592.7
B7	7	12855.2	5495	4173.1	5872.9
B8	7	14291.4	6123.9	4561.5	6415.1
B9	7	12334.8	5231.5	3913.1	5527.7
B10	7	13068.5	5481.4	4116.3	5820.4
B11	7	11968.2	5085.9	3807.9	5419.9
B12	7	14834.9	6476.9	4796.9	6610.9
C1	7	15164.5	6640.6	5108.6	7284.2
C2	7	9233.5	3920.5	3034.4	4452.9
C3	7	11085	4712.5	3578.4	5052
C4	7	-913.398	-650.102	-477.398	-427.398
C5	7	-710.699	-503.801	-372.301	-372.699
C6	7	-1085.2	-744.102	-549.398	-515
C7	7	-671.199	-468.301	-336.602	-317
C8	7	-1193	-812.301	-597.602	-549.102
C9	7	-800.602	-573	-409.199	-401.301
C10	7	-1024	-705	-495.801	-482.898
C11	7	-855.102	-582	-427.199	-374
C12	7	-1066.8	-712.199	-471.102	-423.801
D1	7	-1206.4	-819.898	-595.398	-549.199
D2	7	-700.602	-499.199	-375.398	-354.5
D3	7	-1157.9	-808.102	-563.102	-532.602
D4	7	-828.801	-577.699	-416.5	-407.898
D5	7	-1067.4	-739.102	-545.102	-501.699
D6	7	-780.898	-560.5	-413.301	-379.301
D7	7	-1098	-758.801	-526.301	-492.398
D8	7	-868.898	-598.102	-435.5	-438.801
D9	7	-1177.9	-813.5	-630.398	-732.398
D10	7	-962.898	-676.602	-485.199	-463.5
D11	7	-1083.1	-720	-522.398	-471.398
D12	7	-767.199	-507	-359.898	-347.898
E1	7	-756.5	-543.801	-408	-352
E2	7	-1106.5	-760.602	-569.801	-532
E3	7	-797.199	-573.801	-423	-395.5
E4	7	-1027.2	-729.699	-519.398	-446.102
E5	7	-778.602	-537.398	-407.801	-378
E6	7	-1109.3	-760.5	-536.5	-511.898
E7	7	-993.102	-689.5	-508.898	-472.801
E8	7	-1114.8	-767.5	-532.602	-489.5
E9	7	-834.898	-583.102	-428	-421.898
E10	7	-758.801	-528.102	-378.301	-345.199
E11	7	-1042.7	-697	-504.398	-448.898
E12	7	-1011.5	-666.602	-471.301	-468.801
F1	7	-1103.2	-761.102	-578.801	-528.398
F2	7	-828.102	-574.102	-428.102	-406.5
F3	7	-960.301	-663.801	-485.801	-470.699
F4	7	-897.5	-618	-473.602	-436.398
F5	7	-1106.2	-767.699	-548.5	-524.5
F6	7	-927.801	-649.801	-471.801	-448.898
F7	7	-1115.7	-769	-571.801	-512.5
F8	7	-927.102	-643.801	-474.102	-460
F9	7	-993.699	-678.699	-497.102	-475.102
F10	7	-695	-468.898	-325.398	-278.102
F11	7	-1005.9	-679.199	-495.301	-460.102
F12	7	-935.102	-588.102	-397.398	-347.898
G1	7	-830.102	-581.102	-413.699	-388.801
G2	7	-872.301	-627.199	-453.199	-432.898
G3	7	-1015.3	-700.102	-504.102	-490.699
G4	7	-813.801	-581.102	-425.699	-379.301
G5	7	-876.398	-620.5	-441	-405.602
G6	7	-1178.9	-819.898	-579.5	-520.898
G7	7	-884.102	-623.102	-455	-435.5
G8	7	-1194.4	-811	-588.301	-531.398
G9	7	-986.398	-674.102	-475.398	-452.301
G10	7	-941.699	-638.102	-465	-434.699
G11	7	-1063.1	-712.699	-515	-500.898
G12	7	-913.602	-628.801	-439.898	-412.199
H1	7	-1025	-698.5	-483.699	-452.898
H2	7	-787.602	-558.301	-392.699	-379.699
H3	7	-1147.5	-785.602	-566.602	-546
H4	7	-787.801	-553.602	-387.199	-378.898
H5	7	-1015.4	-700	-505.699	-462.5
H6	7	-637.102	-451.898	-331.102	-326
H7	7	-1153.7	-796.199	-558.801	-522.699
H8	7	-731.398	-513.301	-368.398	-344.102
H9	7	-990.898	-674	-491.602	-458.199
H10	7	-725.699	-508.699	-374.102	-371.602
H11	7	-1143.5	-761.898	-543.5	-512
H12	7	-1147.9	-755	-525.5	-474.801
A1	8	13183.7	5816.2	4491	6503.5
A2	8	12948.6	5579	4255.6	6128
A3	8	14564.3	6356.7	4809.7	6713.4
A4	8	10402.8	4416.7	3395.7	4852.9
A5	8	13049.5	5541.5	4178.2	5941.3
A6	8	12709.3	5441.6	4234.2	6112
A7	8	13800.3	5968.7	4500.7	6306.9
A8	8	13211.8	5650.1	4273.9	6036.4
A9	8	13649.9	5822.9	4366	6120.8
A10	8	13968.7	5989	4561.1	6435.4
A11	8	13651.4	5777.4	4333.3	6099.4
A12	8	13818.1	5907	4568.3	6650.5
B1	8	10894.4	4690.7	3597.9	5245
B2	8	13772.9	5877.1	4378.4	6210.4
B3	8	12090.2	5150.5	3927	5595.9
B4	8	12424	5341.1	4023	5708.6
B5	8	12314.5	5242.8	3948.8	5576.9
B6	8	14561.4	6249.6	4700.3	6645.7
B7	8	12888.2	5531	4167.1	5856.9
B8	8	14322.4	6154.9	4583.5	6432.1
B9	8	12378.8	5248.5	3941.1	5555.7
B10	8	13051.5	5467.4	4085.3	5801.4
B11	8	12016.2	5129.9	3841.9	5437.9
B12	8	14857.9	6500.9	4820.9	6615.9
C1	8	15125.5	6626.6	5095.6	7280.2
C2	8	9272.5	3938.5	3048.4	4465.9
C3	8	11120	4747.5	3589.4	5058
C4	8	-884.398	-624.102	-448.398	-421.398
C5	8	-657.699	-486.801	-359.301	-344.699
C6	8	-1083.2	-732.102	-538.398	-499
C7	8	-617.199	-455.301	-325.602	-314
C8	8	-1172	-804.301	-587.602	-538.102
C9	8	-795.602	-573	-424.199	-384.301
C10	8	-997	-682	-498.801	-451.898
C11	8	-832.102	-561	-412.199	-377
C12	8	-1039.8	-699.199	-464.102	-414.801
D1	8	-1178.4	-822.898	-585.398	-553.199
D2	8	-660.602	-470.199	-366.398	-348.5
D3	8	-1139.9	-783.102	-561.102	-520.602
D4	8	-763.801	-535.699	-398.5	-390.898
D5	8	-1048.4	-715.102	-520.102	-478.699
D6	8	-739.898	-541.5	-392.301	-387.301
D7	8	-1089	-748.801	-526.301	-481.398
D8	8	-831.898	-584.102	-435.5	-417.801
D9	8	-1168.9	-815.5	-633.398	-734.398
D10	8	-942.898	-657.602	-477.199	-444.5
D11	8	-1070.1	-711	-498.398	-449.398
D12	8	-707.199	-480	-333.898	-347.898
E1	8	-717.5	-530.801	-378	-325
E2	8	-1094.5	-776.602	-563.801	-523
E3	8	-754.199	-538.801	-392	-392.5
E4	8	-1012.2	-699.699	-491.398	-439.102
E5	8	-734.602	-531.398	-391.801	-372
E6	8	-1090.3	-758.5	-547.5	-515.898
E7	8	-961.102	-673.5	-486.898	-472.801
E8	8	-1116.8	-794.5	-547.602	-487.5
E9	8	-795.898	-566.102	-412	-403.898
E10	8	-744.801	-516.102	-366.301	-353.199
E11	8	-1014.7	-688	-502.398	-451.898
E12	8	-970.5	-622.602	-459.301	-438.801
F1	8	-1073.2	-746.102	-557.801	-514.398
F2	8	-783.102	-581.102	-399.102	-398.5
F3	8	-957.301	-652.801	-484.801	-450.699
F4	8	-889.5	-622	-459.602	-434.398
F5	8	-1094.2	-774.699	-550.5	-516.5
F6	8	-922.801	-649.801	-474.801	-442.898
F7	8	-1113.7	-749	-538.801	-504.5
F8	8	-890.102	-617.801	-459.102	-421
F9	8	-966.699	-673.699	-486.102	-451.102
F10	8	-662	-446.898	-318.398	-279.102
F11	8	-1004.9	-668.199	-481.301	-441.102
F12	8	-882.102	-548.102	-382.398	-339.898
G1	8	-785.102	-559.102	-408.699	-388.801
G2	8	-855.301	-594.199	-430.199	-420.898
G3	8	-993.301	-692.102	-508.102	-484.699
G4	8	-796.801	-568.102	-425.699	-392.301
G5	8	-855.398	-583.5	-429	-402.602
G6	8	-1156.9	-803.898	-574.5	-522.898
G7	8	-860.102	-617.102	-434	-435.5
G8	8	-1171.4	-798	-592.301	-523.398
G9	8	-958.398	-646.102	-476.398	-442.301
G10	8	-900.699	-625.102	-455	-413.699
G11	8	-1034.1	-702.699	-512	-486.898
G12	8	-906.602	-606.801	-434.898	-412.199
H1	8	-1010	-690.5	-479.699	-456.898
H2	8	-771.602	-540.301	-407.699	-389.699
H3	8	-1105.5	-776.602	-563.602	-538
H4	8	-782.801	-542.602	-395.199	-372.898
H5	8	-1024.4	-697	-503.699	-451.5
H6	8	-615.102	-441.898	-334.102	-323
H7	8	-1143.7	-777.199	-554.801	-511.699
H8	8	-718.398	-519.301	-371.398	-335.102
H9	8	-956.898	-663	-466.602	-440.199
H10	8	-698.699	-501.699	-373.102	-348.602
H11	8	-1128.5	-750.898	-545.5	-491
H12	8	-1142.9	-749	-516.5	-473.801
A1	9	13167.7	5810.2	4474	6474.5
A2	9	12972.6	5609	4262.6	6143
A3	9	14603.3	6391.7	4818.7	6720.4
A4	9	10404.8	4440.7	3395.7	4843.9
A5	9	13185.5	5618.5	4231.2	6025.3
A6	9	12743.3	5468.6	4265.2	6136
A7	9	13851.3	5997.7	4502.7	6329.9
A8	9	13230.8	5663.1	4264.9	6045.4
A9	9	13777.9	5879.9	4391	6185.8
A10	9	13894.7	5952	4522.1	6346.4
A11	9	13705.4	5808.4	4341.3	6130.4
A12	9	13856.1	5930	4578.3	6698.5
B1	9	11004.4	4755.7	3647.9	5309
B2	9	13817.9	5893.1	4397.4	6250.4
B3	9	12037.2	5148.5	3902	5568.9
B4	9	12773	5478.1	4150	5884.6
B5	9	12376.5	5264.8	3981.8	5611.9
B6	9	14639.4	6280.6	4723.3	6657.7
B7	9	12889.2	5515	4155.1	5858.9
B8	9	14390.4	6193.9	4590.5	6442.1
B9	9	12387.8	5242.5	3924.1	5544.7
B10	9	13122.5	5510.4	4121.3	5830.4
B11	9	12052.2	5131.9	3822.9	5435.9
B12	9	14868.9	6496.9	4802.9	6607.9
C1	9	15240.5	6663.6	5116.6	7299.2
C2	9	9289.5	3934.5	3062.4	4485.9
C3	9	11186	4767.5	3604.4	5083
C4	9	-882.398	-611.102	-446.398	-417.398
C5	9	-633.699	-471.801	-340.301	-350.699
C6	9	-1062.2	-726.102	-521.398	-496
C7	9	-573.199	-426.301	-317.602	-308
C8	9	-1158	-782.301	-567.602	-526.102
C9	9	-752.602	-525	-397.199	-361.301
C10	9	-985	-686	-478.801	-452.898
C11	9	-791.102	-536	-386.199	-342
C12	9	-1032.8	-681.199	-449.102	-400.801
D1	9	-1180.4	-817.898	-578.398	-559.199
D2	9	-638.602	-474.199	-357.398	-341.5
D3	9	-1147.9	-764.102	-535.102	-519.602
D4	9	-732.801	-523.699	-393.5	-384.898
D5	9	-1050.4	-728.102	-527.102	-495.699
D6	9	-709.898	-514.5	-380.301	-375.301
D7	9	-1105	-746.801	-508.301	-488.398
D8	9	-790.898	-553.102	-399.5	-399.801
D9	9	-1141.9	-800.5	-619.398	-712.398
D10	9	-929.898	-649.602	-473.199	-428.5
D11	9	-1032.1	-694	-491.398	-459.398
D12	9	-677.199	-455	-331.898	-318.898
E1	9	-665.5	-499.801	-362	-312
E2	9	-1060.5	-746.602	-556.801	-517
E3	9	-702.199	-529.801	-374	-367.5
E4	9	-973.199	-676.699	-496.398	-414.102
E5	9	-711.602	-514.398	-388.801	-370
E6	9	-1086.3	-733.5	-526.5	-510.898
E7	9	-932.102	-654.5	-494.898	-460.801
E8	9	-1106.8	-766.5	-542.602	-487.5
E9	9	-777.898	-553.102	-406	-385.898
E10	9	-732.801	-511.102	-367.301	-360.199
E11	9	-1023.7	-691	-491.398	-459.898
E12	9	-936.5	-623.602	-456.301	-418.801
F1	9	-1061.2	-734.102	-538.801	-511.398
F2	9	-770.102	-558.102	-400.102	-394.5
F3	9	-928.301	-652.801	-479.801	-440.699
F4	9	-834.5	-593	-436.602	-414.398
F5	9	-1093.2	-764.699	-553.5	-501.5
F6	9	-888.801	-617.801	-459.801	-435.898
F7	9	-1065.7	-751	-525.801	-505.5
F8	9	-850.102	-596.801	-450.102	-424
F9	9	-945.699	-658.699	-477.102	-447.102
F10	9	-638	-436.898	-291.398	-265.102
F11	9	-974.898	-640.199	-487.301	-445.102
F12	9	-899.102	-540.102	-379.398	-320.898
G1	9	-778.102	-551.102	-400.699	-388.801
G2	9	-825.301	-590.199	-429.199	-420.898
G3	9	-968.301	-661.102	-492.102	-475.699
G4	9	-760.801	-537.102	-402.699	-372.301
G5	9	-828.398	-575.5	-424	-397.602
G6	9	-1151.9	-784.898	-566.5	-519.898
G7	9	-822.102	-601.102	-419	-421.5
G8	9	-1163.4	-784	-575.301	-512.398
G9	9	-939.398	-654.102	-465.398	-433.301
G10	9	-881.699	-605.102	-448	-405.699
G11	9	-999.102	-686.699	-503	-476.898
G12	9	-876.602	-587.801	-425.898	-395.199
H1	9	-1003	-665.5	-478.699	-460.898
H2	9	-733.602	-515.301	-375.699	-371.699
H3	9	-1117.5	-760.602	-564.602	-528
H4	9	-734.801	-513.602	-368.199	-346.898
H5	9	-1001.4	-691	-492.699	-476.5
H6	9	-584.102	-431.898	-323.102	-312
H7	9	-1123.7	-774.199	-538.801	-510.699
H8	9	-694.398	-494.301	-370.398	-329.102
H9	9	-958.898	-661	-455.602	-438.199
H10	9	-689.699	-490.699	-374.102	-353.602
H11	9	-1123.5	-755.898	-528.5	-494
H12	9	-1121.9	-725	-520.5	-453.801
A1	10	13232.7	5836.2	4493	6512.5
A2	10	12954.6	5578	4245.6	6118
A3	10	14581.3	6362.7	4816.7	6727.4
A4	10	10448.8	4436.7	3408.7	4868.9
A5	10	13262.5	5647.5	4250.2	6040.3
A6	10	12831.3	5485.6	4271.2	6179
A7	10	13863.3	5992.7	4516.7	6327.9
A8	10	13248.8	5671.1	4280.9	6031.4
A9	10	13650.9	5802.9	4353	6114.8
A10	10	13931.7	5987	4524.1	6380.4
A11	10	13762.4	5824.4	4376.3	6149.4
A12	10	13794.1	5913	4558.3	6662.5
B1	10	10941.4	4712.7	3630.9	5272
B2	10	13875.9	5922.1	4398.4	6250.4
B3	10	12172.2	5192.5	3944	5625.9
B4	10	12528	5375.1	4053	5745.6
B5	10	12482.5	5318.8	4028.8	5688.9
B6	10	14693.4	6289.6	4725.3	6683.7
B7	10	12942.2	5524	4161.1	5838.9
B8	10	14421.4	6210.9	4610.5	6471.1
B9	10	12437.8	5281.5	3956.1	5585.7
B10	10	13132.5	5533.4	4133.3	5837.4
B11	10	12043.2	5124.9	3835.9	5425.9
B12	10	14968.9	6546.9	4854.9	6659.9
C1	10	15256.5	6687.6	5131.6	7338.2
C2	10	9295.5	3942.5	3044.4	4454.9
C3	10	11208	4789.5	3614.4	5094
C4	10	-849.398	-606.102	-428.398	-404.398
C5	10	-606.699	-451.801	-331.301	-331.699
C6	10	-1052.2	-716.102	-528.398	-493
C7	10	-549.199	-413.301	-301.602	-301
C8	10	-1133	-781.301	-561.602	-535.102
C9	10	-758.602	-539	-412.199	-365.301
C10	10	-957	-662	-462.801	-437.898
C11	10	-768.102	-538	-390.199	-352
C12	10	-1003.8	-657.199	-431.102	-392.801
D1	10	-1167.4	-810.898	-586.398	-551.199
D2	10	-619.602	-459.199	-364.398	-335.5
D3	10	-1151.9	-784.102	-540.102	-516.602
D4	10	-677.801	-498.699	-380.5	-374.898
D5	10	-1054.4	-708.102	-521.102	-480.699
D6	10	-669.898	-500.5	-381.301	-363.301
D7	10	-1063	-737.801	-512.301	-487.398
D8	10	-773.898	-544.102	-425.5	-390.801
D9	10	-1110.9	-772.5	-596.398	-702.398
D10	10	-921.898	-651.602	-467.199	-430.5
D11	10	-1005.1	-686	-496.398	-449.398
D12	10	-630.199	-429	-312.898	-310.898
E1	10	-644.5	-473.801	-354	-298
E2	10	-1038.5	-741.602	-548.801	-511
E3	10	-687.199	-505.801	-369	-365.5
E4	10	-954.199	-677.699	-486.398	-419.102
E5	10	-684.602	-487.398	-377.801	-355
E6	10	-1070.3	-725.5	-516.5	-509.898
E7	10	-916.102	-636.5	-490.898	-464.801
E8	10	-1083.8	-754.5	-549.602	-504.5
E9	10	-748.898	-550.102	-394	-396.898
E10	10	-695.801	-501.102	-380.301	-344.199
E11	10	-996.699	-657	-478.398	-454.898
E12	10	-894.5	-606.602	-434.301	-392.801
F1	10	-1036.2	-726.102	-524.801	-515.398
F2	10	-746.102	-541.102	-400.102	-375.5
F3	10	-895.301	-640.801	-456.801	-436.699
F4	10	-820.5	-587	-435.602	-420.398
F5	10	-1070.2	-754.699	-553.5	-517.5
F6	10	-852.801	-601.801	-436.801	-413.898
F7	10	-1056.7	-747	-538.801	-498.5
F8	10	-827.102	-591.801	-425.102	-410
F9	10	-900.699	-623.699	-455.102	-450.102
F10	10	-621	-446.898	-299.398	-281.102
F11	10	-946.898	-638.199	-467.301	-433.102
F12	10	-848.102	-515.102	-341.398	-310.898
G1	10	-736.102	-522.102	-391.699	-368.801
G2	10	-778.301	-572.199	-410.199	-407.898
G3	10	-941.301	-666.102	-485.102	-454.699
G4	10	-748.801	-539.102	-395.699	-363.301
G5	10	-780.398	-559.5	-408	-380.602
G6	10	-1138.9	-804.898	-558.5	-508.898
G7	10	-807.102	-595.102	-429	-429.5
G8	10	-1146.4	-772	-561.301	-522.398
G9	10	-890.398	-628.102	-444.398	-407.301
G10	10	-860.699	-593.102	-430	-417.699
G11	10	-983.102	-675.699	-497	-464.898
G12	10	-860.602	-564.801	-421.898	-382.199
H1	10	-984	-665.5	-466.699	-436.898
H2	10	-710.602	-517.301	-367.699	-371.699
H3	10	-1088.5	-752.602	-556.602	-524
H4	10	-704.801	-511.602	-382.199	-360.898
H5	10	-997.398	-670	-499.699	-472.5
H6	10	-575.102	-416.898	-305.102	-310
H7	10	-1123.7	-776.199	-557.801	-499.699
H8	10	-671.398	-471.301	-363.398	-321.102
H9	10	-909.898	-630	-455.602	-425.199
H10	10	-667.699	-493.699	-367.102	-343.602
H11	10	-1105.5	-734.898	-530.5	-484
H12	10	-1118.9	-723	-508.5	-461.801
A1	11	13227.7	5813.2	4507	6509.5
A2	11	12970.6	5601	4259.6	6130
A3	11	14557.3	6352.7	4806.7	6700.4
A4	11	10458.8	4443.7	3398.7	4878.9
A5	11	13200.5	5600.5	4241.2	6009.3
A6	11	12694.3	5439.6	4221.2	6087
A7	11	13842.3	6000.7	4496.7	6322.9
A8	11	13234.8	5680.1	4272.9	6019.4
A9	11	13605.9	5786.9	4331	6080.8
A10	11	13919.7	5971	4513.1	6353.4
A11	11	13745.4	5823.4	4366.3	6140.4
A12	11	13724.1	5864	4547.3	6610.5
B1	11	10918.4	4711.7	3607.9	5261
B2	11	13845.9	5908.1	4383.4	6236.4
B3	11	12088.2	5167.5	3921	5596.9
B4	11	13121	5650.1	4272	6044.6
B5	11	12369.5	5247.8	3961.8	5597.9
B6	11	14745.4	6318.6	4755.3	6709.7
B7	11	12950.2	5521	4176.1	5874.9
B8	11	14476.4	6219.9	4615.5	6462.1
B9	11	12426.8	5266.5	3944.1	5553.7
B10	11	13134.5	5531.4	4114.3	5854.4
B11	11	12074.2	5142.9	3837.9	5442.9
B12	11	15067.9	6602.9	4874.9	6699.9
C1	11	15266.5	6674.6	5119.6	7318.2
C2	11	9290.5	3964.5	3049.4	4479.9
C3	11	11228	4794.5	3601.4	5077
C4	11	-828.398	-609.102	-443.398	-414.398
C5	11	-560.699	-437.801	-325.301	-334.699
C6	11	-1032.2	-717.102	-528.398	-486
C7	11	-523.199	-400.301	-299.602	-290
C8	11	-1111	-767.301	-557.602	-523.102
C9	11	-740.602	-525	-394.199	-379.301
C10	11	-942	-667	-470.801	-434.898
C11	11	-757.102	-530	-396.199	-333
C12	11	-973.801	-650.199	-432.102	-382.801
D1	11	-1147.4	-781.898	-564.398	-543.199
D2	11	-598.602	-456.199	-360.398	-335.5
D3	11	-1128.9	-765.102	-540.102	-504.602
D4	11	-682.801	-499.699	-360.5	-367.898
D5	11	-1024.4	-708.102	-516.102	-505.699
D6	11	-657.898	-486.5	-374.301	-364.301
D7	11	-1047	-703.801	-499.301	-477.398
D8	11	-754.898	-521.102	-404.5	-405.801
D9	11	-1082.9	-760.5	-599.398	-707.398
D10	11	-915.898	-635.602	-457.199	-430.5
D11	11	-980.102	-678	-475.398	-438.398
D12	11	-576.199	-399	-292.898	-283.898
E1	11	-602.5	-458.801	-335	-303
E2	11	-1015.5	-703.602	-520.801	-512
E3	11	-657.199	-480.801	-370	-357.5
E4	11	-936.199	-658.699	-468.398	-402.102
E5	11	-631.602	-477.398	-367.801	-342
E6	11	-1069.3	-722.5	-532.5	-502.898
E7	11	-876.102	-611.5	-465.898	-451.801
E8	11	-1075.8	-758.5	-542.602	-486.5
E9	11	-721.898	-526.102	-379	-376.898
E10	11	-687.801	-485.102	-360.301	-328.199
E11	11	-978.699	-666	-489.398	-435.898
E12	11	-863.5	-573.602	-424.301	-391.801
F1	11	-1025.2	-720.102	-517.801	-516.398
F2	11	-698.102	-536.102	-388.102	-380.5
F3	11	-878.301	-609.801	-459.801	-428.699
F4	11	-761.5	-546	-411.602	-398.398
F5	11	-1079.2	-758.699	-550.5	-521.5
F6	11	-828.801	-598.801	-442.801	-418.898
F7	11	-1029.7	-718	-524.801	-495.5
F8	11	-813.102	-565.801	-435.102	-411
F9	11	-875.699	-618.699	-454.102	-425.102
F10	11	-616	-429.898	-290.398	-280.102
F11	11	-918.898	-629.199	-453.301	-412.102
F12	11	-801.102	-508.102	-330.398	-290.898
G1	11	-696.102	-523.102	-382.699	-369.801
G2	11	-780.301	-567.199	-424.199	-405.898
G3	11	-907.301	-641.102	-489.102	-455.699
G4	11	-717.801	-514.102	-384.699	-362.301
G5	11	-743.398	-532.5	-383	-374.602
G6	11	-1123.9	-787.898	-553.5	-521.898
G7	11	-786.102	-570.102	-427	-399.5
G8	11	-1138.4	-759	-560.301	-508.398
G9	11	-883.398	-598.102	-441.398	-421.301
G10	11	-851.699	-592.102	-421	-410.699
G11	11	-957.102	-666.699	-469	-455.898
G12	11	-820.602	-551.801	-394.898	-369.199
H1	11	-975	-659.5	-468.699	-443.898
H2	11	-672.602	-507.301	-375.699	-363.699
H3	11	-1064.5	-737.602	-543.602	-520
H4	11	-665.801	-472.602	-359.199	-346.898
H5	11	-982.398	-672	-494.699	-453.5
H6	11	-563.102	-403.898	-301.102	-304
H7	11	-1119.7	-774.199	-540.801	-498.699
H8	11	-679.398	-474.301	-349.398	-320.102
H9	11	-886.898	-626	-457.602	-415.199
H10	11	-667.699	-488.699	-370.102	-361.602
H11	11	-1092.5	-736.898	-518.5	-490
H12	11	-1092.9	-714	-501.5	-449.801
A1	12	13217.7	5818.2	4478	6502.5
A2	12	13028.6	5620	4289.6	6169
A3	12	14567.3	6365.7	4791.7	6711.4
A4	12	10419.8	4417.7	3391.7	4843.9
A5	12	13124.5	5580.5	4206.2	5949.3
A6	12	12701.3	5447.6	4229.2	6103
A7	12	13875.3	6004.7	4531.7	6335.9
A8	12	13277.8	5690.1	4285.9	6044.4
A9	12	13723.9	5848.9	4378	6167.8
A10	12	13884.7	5944	4513.1	6342.4
A11	12	13708.4	5829.4	4350.3	6130.4
A12	12	13770.1	5899	4551.3	6642.5
B1	12	11017.4	4758.7	3660.9	5302
B2	12	13926.9	5968.1	4423.4	6274.4
B3	12	12040.2	5123.5	3904	5553.9
B4	12	13015	5592.1	4239	5975.6
B5	12	12308.5	5238.8	3934.8	5548.9
B6	12	14739.4	6334.6	4745.3	6699.7
B7	12	12952.2	5532	4179.1	5847.9
B8	12	14506.4	6226.9	4633.5	6504.1
B9	12	12466.8	5271.5	3934.1	5554.7
B10	12	13156.5	5528.4	4119.3	5860.4
B11	12	12111.2	5151.9	3863.9	5470.9
B12	12	15013.9	6563.9	4849.9	6677.9
C1	12	15293.5	6694.6	5135.6	7304.2
C2	12	9299.5	3956.5	3059.4	4465.9
C3	12	11271	4801.5	3633.4	5117
C4	12	-810.398	-586.102	-416.398	-397.398
C5	12	-547.699	-412.801	-307.301	-319.699
C6	12	-1005.2	-689.102	-502.398	-489
C7	12	-495.199	-378.301	-284.602	-278
C8	12	-1079	-751.301	-539.602	-505.102
C9	12	-719.602	-523	-388.199	-370.301
C10	12	-910	-627	-459.801	-414.898
C11	12	-739.102	-523	-364.199	-335
C12	12	-931.801	-613.199	-418.102	-357.801
D1	12	-1138.4	-788.898	-561.398	-545.199
D2	12	-611.602	-455.199	-335.398	-340.5
D3	12	-1101.9	-757.102	-529.102	-497.602
D4	12	-655.801	-489.699	-357.5	-370.898
D5	12	-1001.4	-685.102	-517.102	-466.699
D6	12	-639.898	-467.5	-353.301	-364.301
D7	12	-1021	-697.801	-509.301	-471.398
D8	12	-728.898	-520.102	-403.5	-392.801
D9	12	-1044.9	-753.5	-588.398	-695.398
D10	12	-921.898	-640.602	-456.199	-426.5
D11	12	-965.102	-640	-464.398	-434.398
D12	12	-546.199	-378	-285.898	-282.898
E1	12	-580.5	-437.801	-332	-288
E2	12	-987.5	-701.602	-518.801	-485
E3	12	-628.199	-469.801	-345	-349.5
E4	12	-886.199	-626.699	-460.398	-403.102
E5	12	-609.602	-454.398	-343.801	-330
E6	12	-1050.3	-716.5	-515.5	-503.898
E7	12	-845.102	-604.5	-462.898	-445.801
E8	12	-1050.8	-739.5	-529.602	-478.5
E9	12	-710.898	-505.102	-368	-371.898
E10	12	-674.801	-469.102	-344.301	-335.199
E11	12	-943.699	-639	-465.398	-435.898
E12	12	-816.5	-546.602	-406.301	-376.801
F1	12	-988.199	-700.102	-512.801	-497.398
F2	12	-683.102	-505.102	-377.102	-381.5
F3	12	-856.301	-600.801	-452.801	-416.699
F4	12	-734.5	-526	-404.602	-376.398
F5	12	-1071.2	-755.699	-546.5	-505.5
F6	12	-805.801	-585.801	-435.801	-405.898
F7	12	-1003.7	-706	-516.801	-488.5
F8	12	-796.102	-558.801	-411.102	-401
F9	12	-886.699	-627.699	-442.102	-441.102
F10	12	-604	-422.898	-297.398	-263.102
F11	12	-888.898	-602.199	-453.301	-425.102
F12	12	-766.102	-471.102	-327.398	-282.898
G1	12	-665.102	-496.102	-366.699	-358.801
G2	12	-746.301	-540.199	-408.199	-400.898
G3	12	-889.301	-620.102	-467.102	-456.699
G4	12	-698.801	-500.102	-371.699	-357.301
G5	12	-719.398	-516.5	-368	-344.602
G6	12	-1105.9	-766.898	-554.5	-505.898
G7	12	-764.102	-559.102	-411	-412.5
G8	12	-1117.4	-760	-539.301	-502.398
G9	12	-858.398	-607.102	-437.398	-421.301
G10	12	-815.699	-583.102	-430	-401.699
G11	12	-915.102	-637.699	-460	-456.898
G12	12	-786.602	-550.801	-389.898	-375.199
H1	12	-953	-642.5	-464.699	-433.898
H2	12	-653.602	-493.301	-369.699	-356.699
H3	12	-1025.5	-728.602	-522.602	-513
H4	12	-646.801	-467.602	-347.199	-342.898
H5	12	-976.398	-672	-494.699	-468.5
H6	12	-545.102	-396.898	-295.102	-302
H7	12	-1117.7	-746.199	-543.801	-504.699
H8	12	-672.398	-462.301	-356.398	-328.102
H9	12	-862.898	-606	-451.602	-418.199
H10	12	-685.699	-486.699	-379.102	-350.602
H11	12	-1067.5	-715.898	-520.5	-490
H12	12	-1071.9	-703	-490.5	-438.801
A1	13	13209.7	5824.2	4485	6508.5
A2	13	13006.6	5614	4272.6	6138
A3	13	14628.3	6399.7	4808.7	6726.4
A4	13	10463.8	4443.7	3418.7	4858.9
A5	13	13211.5	5637.5	4241.2	6036.3
A6	13	12821.3	5498.6	4273.2	6166
A7	13	13872.3	6016.7	4521.7	6354.9
A8	13	13307.8	5699.1	4279.9	6046.4
A9	13	13641.9	5811.9	4360	6095.8
A10	13	13939.7	5988	4537.1	6369.4
A11	13	13740.4	5813.4	4361.3	6129.4
A12	13	13845.1	5930	4572.3	6679.5
B1	13	10975.4	4741.7	3636.9	5281
B2	13	13907.9	5943.1	4405.4	6246.4
B3	13	12130.2	5179.5	3928	5601.9
B4	13	13101	5634.1	4266	6007.6
B5	13	12484.5	5311.8	4005.8	5651.9
B6	13	14799.4	6358.6	4773.3	6724.7
B7	13	13001.2	5549	4183.1	5862.9
B8	13	14599.4	6262.9	4652.5	6536.1
B9	13	12466.8	5286.5	3958.1	5579.7
B10	13	13147.5	5529.4	4120.3	5826.4
B11	13	12136.2	5169.9	3854.9	5476.9
B12	13	15029.9	6568.9	4871.9	6683.9
C1	13	15145.5	6633.6	5084.6	7233.2
C2	13	9304.5	3942.5	3061.4	4468.9
C3	13	11304	4824.5	3632.4	5121
C4	13	-769.398	-551.102	-404.398	-393.398
C5	13	-520.699	-386.801	-297.301	-307.699
C6	13	-977.199	-671.102	-492.398	-469
C7	13	-488.199	-390.301	-271.602	-274
C8	13	-1058	-738.301	-518.602	-501.102
C9	13	-713.602	-507	-392.199	-365.301
C10	13	-895	-627	-453.801	-403.898
C11	13	-715.102	-506	-365.199	-341
C12	13	-898.801	-607.199	-388.102	-362.801
D1	13	-1114.4	-766.898	-566.398	-532.199
D2	13	-586.602	-434.199	-326.398	-312.5
D3	13	-1098.9	-735.102	-531.102	-504.602
D4	13	-638.801	-465.699	-351.5	-344.898
D5	13	-989.398	-674.102	-504.102	-468.699
D6	13	-606.898	-451.5	-344.301	-340.301
D7	13	-1008	-690.801	-494.301	-458.398
D8	13	-729.898	-516.102	-384.5	-386.801
D9	13	-1036.9	-738.5	-578.398	-687.398
D10	13	-910.898	-631.602	-464.199	-425.5
D11	13	-922.102	-624	-438.398	-422.398
D12	13	-533.199	-365	-275.898	-287.898
E1	13	-560.5	-433.801	-319	-270
E2	13	-939.5	-684.602	-506.801	-482
E3	13	-599.199	-445.801	-350	-329.5
E4	13	-858.199	-616.699	-449.398	-398.102
E5	13	-596.602	-449.398	-330.801	-326
E6	13	-1017.3	-715.5	-512.5	-483.898
E7	13	-832.102	-599.5	-451.898	-452.801
E8	13	-1040.8	-741.5	-529.602	-465.5
E9	13	-685.898	-492.102	-371	-361.898
E10	13	-667.801	-476.102	-345.301	-326.199
E11	13	-923.699	-625	-452.398	-423.898
E12	13	-780.5	-527.602	-387.301	-381.801
F1	13	-977.199	-676.102	-502.801	-491.398
F2	13	-649.102	-501.102	-372.102	-357.5
F3	13	-838.301	-594.801	-437.801	-434.699
F4	13	-707.5	-529	-398.602	-375.398
F5	13	-1055.2	-732.699	-525.5	-508.5
F6	13	-798.801	-548.801	-416.801	-405.898
F7	13	-999.699	-693	-504.801	-478.5
F8	13	-763.102	-564.801	-414.102	-406
F9	13	-862.699	-617.699	-445.102	-430.102
F10	13	-582	-390.898	-273.398	-258.102
F11	13	-871.898	-603.199	-433.301	-421.102
F12	13	-727.102	-448.102	-292.398	-276.898
G1	13	-651.102	-451.102	-367.699	-335.801
G2	13	-728.301	-540.199	-405.199	-397.898
G3	13	-841.301	-610.102	-460.102	-448.699
G4	13	-664.801	-471.102	-357.699	-351.301
G5	13	-687.398	-490.5	-368	-342.602
G6	13	-1077.9	-733.898	-533.5	-480.898
G7	13	-755.102	-559.102	-423	-398.5
G8	13	-1092.4	-741	-542.301	-479.398
G9	13	-829.398	-590.102	-426.398	-404.301
G10	13	-827.699	-569.102	-419	-399.699
G11	13	-881.102	-623.699	-450	-445.898
G12	13	-775.602	-514.801	-368.898	-361.199
H1	13	-922	-622.5	-447.699	-406.898
H2	13	-636.602	-464.301	-339.699	-363.699
H3	13	-1017.5	-688.602	-516.602	-508
H4	13	-613.801	-455.602	-329.199	-315.898
H5	13	-961.398	-642	-482.699	-460.5
H6	13	-525.102	-375.898	-291.102	-291
H7	13	-1097.7	-747.199	-539.801	-489.699
H8	13	-645.398	-465.301	-347.398	-317.102
H9	13	-844.898	-600	-431.602	-415.199
H10	13	-669.699	-480.699	-375.102	-361.602
H11	13	-1039.5	-696.898	-511.5	-477
H12	13	-1059.9	-697	-473.5	-438.801
A1	14	13295.7	5858.2	4535	6542.5
A2	14	12979.6	5600	4255.6	6149
A3	14	14565.3	6387.7	4793.7	6694.4
A4	14	10422.8	4429.7	3395.7	4835.9
A5	14	13166.5	5599.5	4232.2	5975.3
A6	14	12735.3	5460.6	4231.2	6102
A7	14	13850.3	6000.7	4524.7	6313.9
A8	14	13335.8	5733.1	4300.9	6048.4
A9	14	13781.9	5872.9	4405	6162.8
A10	14	13943.7	5988	4527.1	6362.4
A11	14	13679.4	5796.4	4341.3	6096.4
A12	14	13790.1	5884	4559.3	6646.5
B1	14	10973.4	4721.7	3625.9	5265
B2	14	13916.9	5947.1	4400.4	6240.4
B3	14	12076.2	5151.5	3909	5566.9
B4	14	13178	5661.1	4274	6061.6
B5	14	12373.5	5261.8	3976.8	5587.9
B6	14	14818.4	6376.6	4753.3	6717.7
B7	14	13022.2	5579	4195.1	5893.9
B8	14	14550.4	6245.9	4661.5	6504.1
B9	14	12472.8	5264.5	3941.1	5551.7
B10	14	13177.5	5554.4	4135.3	5842.4
B11	14	12126.2	5175.9	3870.9	5468.9
B12	14	15095.9	6620.9	4889.9	6721.9
C1	14	15168.5	6639.6	5093.6	7262.2
C2	14	9320.5	3970.5	3045.4	4459.9
C3	14	11235	4783.5	3603.4	5083
C4	14	-755.398	-547.102	-399.398	-379.398
C5	14	-503.699	-376.801	-286.301	-303.699
C6	14	-957.199	-672.102	-487.398	-459
C7	14	-478.199	-357.301	-265.602	-278
C8	14	-1020	-711.301	-523.602	-499.102
C9	14	-690.602	-495	-381.199	-342.301
C10	14	-882	-610	-442.801	-401.898
C11	14	-715.102	-513	-375.199	-316
C12	14	-856.801	-577.199	-376.102	-340.801
D1	14	-1093.4	-751.898	-551.398	-527.199
D2	14	-577.602	-442.199	-341.398	-327.5
D3	14	-1069.9	-734.102	-525.102	-493.602
D4	14	-617.801	-451.699	-328.5	-337.898
D5	14	-936.398	-647.102	-478.102	-437.699
D6	14	-573.898	-462.5	-338.301	-319.301
D7	14	-972	-664.801	-477.301	-453.398
D8	14	-680.898	-493.102	-384.5	-368.801
D9	14	-1015.9	-718.5	-570.398	-690.398
D10	14	-891.898	-628.602	-452.199	-421.5
D11	14	-899.102	-602	-433.398	-414.398
D12	14	-502.199	-356	-282.898	-246.898
E1	14	-537.5	-422.801	-312	-273
E2	14	-938.5	-658.602	-509.801	-477
E3	14	-579.199	-452.801	-334	-308.5
E4	14	-824.199	-590.699	-431.398	-380.102
E5	14	-570.602	-420.398	-342.801	-319
E6	14	-1004.3	-696.5	-507.5	-484.898
E7	14	-833.102	-598.5	-444.898	-426.801
E8	14	-1027.8	-718.5	-502.602	-461.5
E9	14	-674.898	-511.102	-374	-358.898
E10	14	-661.801	-460.102	-339.301	-315.199
E11	14	-895.699	-610	-448.398	-417.898
E12	14	-753.5	-494.602	-350.301	-354.801
F1	14	-953.199	-668.102	-496.801	-479.398
F2	14	-687.102	-496.102	-372.102	-367.5
F3	14	-802.301	-564.801	-434.801	-408.699
F4	14	-690.5	-509	-394.602	-383.398
F5	14	-1024.2	-726.699	-527.5	-499.5
F6	14	-766.801	-539.801	-396.801	-392.898
F7	14	-966.699	-687	-493.801	-465.5
F8	14	-760.102	-540.801	-403.102	-392
F9	14	-857.699	-606.699	-453.102	-428.102
F10	14	-590	-404.898	-296.398	-258.102
F11	14	-839.898	-587.199	-427.301	-406.102
F12	14	-684.102	-422.102	-277.398	-240.898
G1	14	-626.102	-468.102	-360.699	-344.801
G2	14	-712.301	-533.199	-396.199	-380.898
G3	14	-838.301	-600.102	-452.102	-435.699
G4	14	-651.801	-480.102	-344.699	-351.301
G5	14	-647.398	-462.5	-348	-323.602
G6	14	-1048.9	-713.898	-524.5	-462.898
G7	14	-737.102	-542.102	-390	-410.5
G8	14	-1068.4	-719	-525.301	-493.398
G9	14	-821.398	-574.102	-425.398	-401.301
G10	14	-816.699	-570.102	-414	-398.699
G11	14	-873.102	-609.699	-453	-446.898
G12	14	-728.602	-512.801	-367.898	-341.199
H1	14	-914	-624.5	-444.699	-417.898
H2	14	-631.602	-464.301	-341.699	-348.699
H3	14	-989.5	-685.602	-515.602	-494
H4	14	-586.801	-443.602	-335.199	-310.898
H5	14	-946.398	-638	-477.699	-448.5
H6	14	-505.102	-370.898	-278.102	-282
H7	14	-1067.7	-725.199	-531.801	-483.699
H8	14	-636.398	-441.301	-339.398	-307.102
H9	14	-842.898	-579	-430.602	-415.199
H10	14	-648.699	-464.699	-374.102	-359.602
H11	14	-1007.5	-694.898	-493.5	-459
H12	14	-1018.9	-684	-469.5	-434.801
A1	15	13345.7	5877.2	4538	6561.5
A2	15	12946.6	5601	4250.6	6119
A3	15	14606.3	6386.7	4803.7	6706.4
A4	15	10413.8	4437.7	3395.7	4843.9
A5	15	13216.5	5643.5	4237.2	6008.3
A6	15	12735.3	5452.6	4233.2	6099
A7	15	13904.3	6013.7	4528.7	6343.9
A8	15	13359.8	5743.1	4297.9	6075.4
A9	15	13801.9	5884.9	4401	6164.8
A10	15	13910.7	5976	4519.1	6333.4
A11	15	13676.4	5806.4	4350.3	6092.4
A12	15	13738.1	5868	4538.3	6625.5
B1	15	10944.4	4710.7	3609.9	5254
B2	15	13917.9	5930.1	4405.4	6234.4
B3	15	12113.2	5174.5	3943	5580.9
B4	15	13157	5655.1	4277	6042.6
B5	15	12407.5	5294.8	3985.8	5600.9
B6	15	14876.4	6393.6	4791.3	6740.7
B7	15	13027.2	5564	4196.1	5868.9
B8	15	14548.4	6261.9	4640.5	6494.1
B9	15	12389.8	5228.5	3916.1	5502.7
B10	15	13221.5	5564.4	4151.3	5861.4
B11	15	12150.2	5172.9	3871.9	5470.9
B12	15	15176.9	6637.9	4913.9	6742.9
C1	15	15222.5	6660.6	5111.6	7269.2
C2	15	9392.5	3997.5	3086.4	4497.9
C3	15	11231	4798.5	3610.4	5069
C4	15	-743.398	-534.102	-389.398	-381.398
C5	15	-469.699	-378.801	-293.301	-308.699
C6	15	-927.199	-646.102	-479.398	-457
C7	15	-454.199	-347.301	-268.602	-261
C8	15	-999	-702.301	-511.602	-508.102
C9	15	-682.602	-505	-386.199	-358.301
C10	15	-875	-614	-443.801	-409.898
C11	15	-695.102	-500	-365.199	-321
C12	15	-819.801	-550.199	-365.102	-339.801
D1	15	-1087.4	-737.898	-535.398	-527.199
D2	15	-575.602	-436.199	-312.398	-320.5
D3	15	-1048.9	-730.102	-506.102	-491.602
D4	15	-583.801	-442.699	-334.5	-338.898
D5	15	-904.398	-640.102	-469.102	-442.699
D6	15	-571.898	-432.5	-328.301	-332.301
D7	15	-948	-652.801	-474.301	-444.398
D8	15	-669.898	-496.102	-372.5	-369.801
D9	15	-992.898	-702.5	-542.398	-658.398
D10	15	-879.898	-630.602	-442.199	-432.5
D11	15	-871.102	-589	-414.398	-400.398
D12	15	-477.199	-350	-267.898	-256.898
E1	15	-524.5	-423.801	-307	-261
E2	15	-913.5	-665.602	-506.801	-474
E3	15	-569.199	-437.801	-341	-329.5
E4	15	-809.199	-580.699	-426.398	-378.102
E5	15	-565.602	-422.398	-320.801	-331
E6	15	-969.301	-675.5	-506.5	-482.898
E7	15	-815.102	-592.5	-449.898	-445.801
E8	15	-997.801	-704.5	-506.602	-450.5
E9	15	-668.898	-498.102	-379	-365.898
E10	15	-649.801	-476.102	-338.301	-317.199
E11	15	-849.699	-590	-438.398	-406.898
E12	15	-736.5	-488.602	-368.301	-354.801
F1	15	-924.199	-654.102	-471.801	-462.398
F2	15	-642.102	-479.102	-357.102	-354.5
F3	15	-781.301	-549.801	-420.801	-402.699
F4	15	-656.5	-501	-378.602	-372.398
F5	15	-1015.2	-718.699	-518.5	-492.5
F6	15	-753.801	-543.801	-392.801	-394.898
F7	15	-941.699	-670	-487.801	-466.5
F8	15	-755.102	-530.801	-412.102	-408
F9	15	-846.699	-601.699	-437.102	-425.102
F10	15	-568	-396.898	-281.398	-265.102
F11	15	-827.898	-560.199	-414.301	-398.102
F12	15	-650.102	-401.102	-266.398	-236.898
G1	15	-601.102	-452.102	-353.699	-328.801
G2	15	-712.301	-528.199	-397.199	-387.898
G3	15	-826.301	-601.102	-451.102	-425.699
G4	15	-627.801	-473.102	-338.699	-337.301
G5	15	-623.398	-446.5	-328	-326.602
G6	15	-1006.9	-698.898	-502.5	-456.898
G7	15	-718.102	-530.102	-396	-391.5
G8	15	-1052.4	-719	-531.301	-489.398
G9	15	-816.398	-580.102	-409.398	-389.301
G10	15	-791.699	-565.102	-413	-399.699
G11	15	-854.102	-617.699	-443	-427.898
G12	15	-719.602	-490.801	-354.898	-352.199
H1	15	-899	-607.5	-426.699	-404.898
H2	15	-613.602	-455.301	-338.699	-325.699
H3	15	-959.5	-676.602	-499.602	-485
H4	15	-586.801	-426.602	-332.199	-329.898
H5	15	-933.398	-647	-457.699	-429.5
H6	15	-503.102	-368.898	-289.102	-281
H7	15	-1063.7	-732.199	-537.801	-486.699
H8	15	-629.398	-448.301	-335.398	-311.102
H9	15	-836.898	-588	-417.602	-401.199
H10	15	-664.699	-482.699	-359.102	-345.602
H11	15	-1003.5	-681.898	-505.5	-467
H12	15	-1003.9	-668	-472.5	-427.801
A1	16	13356.7	5902.2	4548	6562.5
A2	16	12915.6	5581	4233.6	6073
A3	16	14590.3	6371.7	4800.7	6690.4
A4	16	10377.8	4406.7	3369.7	4828.9
A5	16	13221.5	5631.5	4234.2	5991.3
A6	16	12742.3	5468.6	4228.2	6110
A7	16	13886.3	6015.7	4526.7	6325.9
A8	16	13424.8	5776.1	4315.9	6086.4
A9	16	13727.9	5856.9	4370	6136.8
A10	16	13931.7	5973	4521.1	6335.4
A11	16	13704.4	5801.4	4346.3	6107.4
A12	16	13782.1	5878	4525.3	6604.5
B1	16	10965.4	4724.7	3640.9	5278
B2	16	13972.9	5964.1	4412.4	6252.4
B3	16	12045.2	5155.5	3911	5549.9
B4	16	13257	5705.1	4316	6083.6
B5	16	12429.5	5297.8	3976.8	5607.9
B6	16	14880.4	6401.6	4789.3	6763.7
B7	16	13099.2	5607	4225.1	5919.9
B8	16	14545.4	6278.9	4634.5	6489.1
B9	16	12470.8	5296.5	3943.1	5545.7
B10	16	13259.5	5583.4	4162.3	5869.4
B11	16	12032.2	5133.9	3809.9	5418.9
B12	16	15172.9	6653.9	4905.9	6755.9
C1	16	15348.5	6720.6	5159.6	7334.2
C2	16	9333.5	3973.5	3037.4	4459.9
C3	16	11363	4850.5	3661.4	5145
C4	16	-719.398	-536.102	-396.398	-365.398
C5	16	-477.699	-359.801	-277.301	-296.699
C6	16	-902.199	-634.102	-487.398	-442
C7	16	-454.199	-343.301	-264.602	-260
C8	16	-985	-684.301	-504.602	-482.102
C9	16	-694.602	-498	-387.199	-352.301
C10	16	-843	-605	-439.801	-406.898
C11	16	-687.102	-491	-370.199	-324
C12	16	-794.801	-536.199	-339.102	-310.801
D1	16	-1042.4	-713.898	-514.398	-508.199
D2	16	-545.602	-426.199	-310.398	-321.5
D3	16	-1015.9	-679.102	-490.102	-477.602
D4	16	-578.801	-441.699	-339.5	-336.898
D5	16	-892.398	-621.102	-452.102	-433.699
D6	16	-558.898	-428.5	-316.301	-320.301
D7	16	-926	-650.801	-462.301	-440.398
D8	16	-681.898	-500.102	-401.5	-373.801
D9	16	-958.898	-704.5	-548.398	-647.398
D10	16	-881.898	-619.602	-452.199	-421.5
D11	16	-830.102	-581	-418.398	-399.398
D12	16	-459.199	-336	-257.898	-269.898
E1	16	-512.5	-405.801	-313	-264
E2	16	-887.5	-636.602	-484.801	-476
E3	16	-547.199	-419.801	-314	-324.5
E4	16	-777.199	-567.699	-413.398	-359.102
E5	16	-531.602	-399.398	-319.801	-310
E6	16	-945.301	-659.5	-479.5	-469.898
E7	16	-799.102	-575.5	-440.898	-419.801
E8	16	-1010.8	-708.5	-506.602	-459.5
E9	16	-647.898	-487.102	-367	-363.898
E10	16	-649.801	-461.102	-334.301	-333.199
E11	16	-842.699	-567	-422.398	-400.898
E12	16	-702.5	-490.602	-356.301	-356.801
F1	16	-883.199	-633.102	-466.801	-459.398
F2	16	-609.102	-467.102	-370.102	-342.5
F3	16	-754.301	-540.801	-403.801	-391.699
F4	16	-646.5	-481	-359.602	-364.398
F5	16	-1007.2	-710.699	-510.5	-486.5
F6	16	-731.801	-537.801	-396.801	-387.898
F7	16	-933.699	-640	-481.801	-460.5
F8	16	-730.102	-539.801	-397.102	-378
F9	16	-810.699	-590.699	-425.102	-420.102
F10	16	-563	-390.898	-278.398	-258.102
F11	16	-784.898	-551.199	-406.301	-399.102
F12	16	-614.102	-363.102	-251.398	-225.898
G1	16	-574.102	-435.102	-336.699	-334.801
G2	16	-711.301	-518.199	-393.199	-390.898
G3	16	-821.301	-589.102	-447.102	-430.699
G4	16	-625.801	-456.102	-347.699	-334.301
G5	16	-601.398	-444.5	-323	-291.602
G6	16	-992.898	-674.898	-488.5	-448.898
G7	16	-717.102	-525.102	-387	-373.5
G8	16	-1044.4	-718	-504.301	-483.398
G9	16	-774.398	-546.102	-410.398	-384.301
G10	16	-785.699	-535.102	-397	-378.699
G11	16	-837.102	-602.699	-437	-419.898
G12	16	-687.602	-480.801	-351.898	-334.199
H1	16	-897	-602.5	-425.699	-394.898
H2	16	-601.602	-454.301	-330.699	-335.699
H3	16	-934.5	-652.602	-495.602	-485
H4	16	-557.801	-411.602	-323.199	-318.898
H5	16	-891.398	-631	-462.699	-409.5
H6	16	-510.102	-370.898	-276.102	-275
H7	16	-1053.7	-736.199	-527.801	-497.699
H8	16	-621.398	-456.301	-348.398	-320.102
H9	16	-821.898	-565	-418.602	-400.199
H10	16	-655.699	-467.699	-361.102	-340.602
H11	16	-974.5	-665.898	-484.5	-464
H12	16	-982.898	-663	-454.5	-427.801
A1	17	13355.7	5884.2	4535	6558.5
A2	17	13008.6	5626	4289.6	6151
A3	17	14679.3	6417.7	4841.7	6733.4
A4	17	10388.8	4431.7	3373.7	4828.9
A5	17	13218.5	5624.5	4234.2	5987.3
A6	17	12850.3	5505.6	4289.2	6169
A7	17	13947.3	6042.7	4530.7	6357.9
A8	17	13372.8	5747.1	4320.9	6060.4
A9	17	13874.9	5915.9	4426	6188.8
A10	17	13916.7	5971	4513.1	6307.4
A11	17	13657.4	5774.4	4325.3	6055.4
A12	17	13813.1	5908	4566.3	6673.5
B1	17	10960.4	4719.7	3622.9	5274
B2	17	14082.9	6020.1	4453.4	6321.4
B3	17	12176.2	5209.5	3951	5631.9
B4	17	13268	5709.1	4307	6086.6
B5	17	12461.5	5302.8	3985.8	5609.9
B6	17	14853.4	6366.6	4768.3	6718.7
B7	17	13060.2	5567	4193.1	5881.9
B8	17	14690.4	6313.9	4679.5	6534.1
B9	17	12561.8	5290.5	3944.1	5547.7
B10	17	13266.5	5585.4	4173.3	5872.4
B11	17	12050.2	5136.9	3843.9	5445.9
B12	17	15108.9	6619.9	4895.9	6705.9
C1	17	15323.5	6716.6	5144.6	7328.2
C2	17	9366.5	3993.5	3072.4	4472.9
C3	17	11370	4857.5	3647.4	5121
C4	17	-690.398	-516.102	-386.398	-370.398
C5	17	-468.699	-384.801	-283.301	-300.699
C6	17	-869.199	-616.102	-468.398	-442
C7	17	-427.199	-340.301	-259.602	-252
C8	17	-953	-673.301	-491.602	-492.102
C9	17	-687.602	-498	-373.199	-351.301
C10	17	-835	-609	-433.801	-407.898
C11	17	-688.102	-494	-363.199	-324
C12	17	-766.801	-515.199	-328.102	-293.801
D1	17	-1017.4	-717.898	-512.398	-490.199
D2	17	-566.602	-433.199	-325.398	-309.5
D3	17	-999.898	-698.102	-476.102	-466.602
D4	17	-559.801	-432.699	-331.5	-331.898
D5	17	-843.398	-592.102	-450.102	-410.699
D6	17	-549.898	-420.5	-322.301	-334.301
D7	17	-900	-629.801	-462.301	-436.398
D8	17	-652.898	-495.102	-382.5	-364.801
D9	17	-937.898	-680.5	-545.398	-665.398
D10	17	-876.898	-615.602	-448.199	-417.5
D11	17	-807.102	-574	-407.398	-410.398
D12	17	-465.199	-329	-266.898	-262.898
E1	17	-500.5	-396.801	-296	-255
E2	17	-867.5	-648.602	-478.801	-482
E3	17	-531.199	-429.801	-317	-320.5
E4	17	-761.199	-566.699	-426.398	-350.102
E5	17	-512.602	-406.398	-322.801	-293
E6	17	-927.301	-647.5	-477.5	-456.898
E7	17	-804.102	-563.5	-442.898	-427.801
E8	17	-975.801	-679.5	-500.602	-452.5
E9	17	-651.898	-485.102	-368	-354.898
E10	17	-652.801	-471.102	-347.301	-327.199
E11	17	-797.699	-556	-396.398	-388.898
E12	17	-689.5	-470.602	-353.301	-336.801
F1	17	-867.199	-618.102	-465.801	-470.398
F2	17	-607.102	-467.102	-352.102	-353.5
F3	17	-731.301	-537.801	-414.801	-394.699
F4	17	-646.5	-475	-373.602	-374.398
F5	17	-985.199	-690.699	-502.5	-475.5
F6	17	-714.801	-519.801	-398.801	-368.898
F7	17	-923.699	-649	-481.801	-467.5
F8	17	-724.102	-540.801	-392.102	-392
F9	17	-830.699	-594.699	-435.102	-417.102
F10	17	-564	-414.898	-287.398	-262.102
F11	17	-781.898	-549.199	-409.301	-390.102
F12	17	-594.102	-363.102	-243.398	-215.898
G1	17	-559.102	-428.102	-328.699	-329.801
G2	17	-704.301	-531.199	-389.199	-387.898
G3	17	-797.301	-590.102	-444.102	-431.699
G4	17	-602.801	-455.102	-327.699	-321.301
G5	17	-587.398	-424.5	-320	-308.602
G6	17	-948.898	-658.898	-472.5	-437.898
G7	17	-709.102	-526.102	-393	-389.5
G8	17	-1025.4	-697	-516.301	-468.398
G9	17	-777.398	-559.102	-413.398	-387.301
G10	17	-785.699	-553.102	-403	-401.699
G11	17	-815.102	-572.699	-428	-421.898
G12	17	-678.602	-480.801	-344.898	-347.199
H1	17	-890	-594.5	-425.699	-398.898
H2	17	-596.602	-432.301	-320.699	-321.699
H3	17	-919.5	-644.602	-485.602	-475
H4	17	-556.801	-403.602	-305.199	-300.898
H5	17	-884.398	-615	-443.699	-417.5
H6	17	-491.102	-360.898	-277.102	-279
H7	17	-1033.7	-723.199	-512.801	-474.699
H8	17	-617.398	-452.301	-337.398	-311.102
H9	17	-806.898	-568	-412.602	-397.199
H10	17	-645.699	-489.699	-366.102	-359.602
H11	17	-950.5	-656.898	-475.5	-460
H12	17	-981.898	-639	-443.5	-417.801
A1	18	13375.7	5904.2	4563	6571.5
A2	18	12875.6	5566	4218.6	6059
A3	18	14726.3	6452.7	4833.7	6729.4
A4	18	10373.8	4411.7	3375.7	4813.9
A5	18	13310.5	5669.5	4255.2	6017.3
A6	18	12843.3	5507.6	4282.2	6157
A7	18	13965.3	6055.7	4533.7	6339.9
A8	18	13441.8	5761.1	4310.9	6077.4
A9	18	13769.9	5862.9	4368	6127.8
A10	18	13949.7	5990	4528.1	6342.4
A11	18	13725.4	5811.4	4351.3	6095.4
A12	18	13813.1	5905	4563.3	6652.5
B1	18	10899.4	4699.7	3594.9	5221
B2	18	13945.9	5943.1	4390.4	6204.4
B3	18	12228.2	5230.5	3952	5631.9
B4	18	13226	5704.1	4292	6050.6
B5	18	12511.5	5327.8	4000.8	5635.9
B6	18	14919.4	6404.6	4789.3	6755.7
B7	18	13090.2	5597	4220.1	5884.9
B8	18	14660.4	6279.9	4660.5	6517.1
B9	18	12530.8	5321.5	3974.1	5590.7
B10	18	13298.5	5612.4	4179.3	5906.4
B11	18	12037.2	5118.9	3816.9	5405.9
B12	18	15120.9	6622.9	4906.9	6719.9
C1	18	15276.5	6705.6	5127.6	7293.2
C2	18	9420.5	4005.5	3084.4	4525.9
C3	18	11346	4859.5	3633.4	5113
C4	18	-676.398	-509.102	-381.398	-358.398
C5	18	-449.699	-370.801	-283.301	-289.699
C6	18	-852.199	-593.102	-449.398	-442
C7	18	-432.199	-344.301	-265.602	-277
C8	18	-926	-658.301	-487.602	-471.102
C9	18	-698.602	-494	-376.199	-349.301
C10	18	-832	-591	-425.801	-405.898
C11	18	-669.102	-481	-371.199	-319
C12	18	-744.801	-518.199	-338.102	-312.801
D1	18	-992.398	-700.898	-511.398	-484.199
D2	18	-534.602	-416.199	-310.398	-309.5
D3	18	-960.898	-675.102	-473.102	-472.602
D4	18	-551.801	-423.699	-314.5	-329.898
D5	18	-822.398	-588.102	-437.102	-403.699
D6	18	-529.898	-416.5	-310.301	-322.301
D7	18	-879	-609.801	-457.301	-418.398
D8	18	-665.898	-490.102	-370.5	-362.801
D9	18	-940.898	-672.5	-524.398	-653.398
D10	18	-863.898	-619.602	-458.199	-439.5
D11	18	-782.102	-552	-397.398	-382.398
D12	18	-458.199	-350	-256.898	-258.898
E1	18	-491.5	-388.801	-289	-244
E2	18	-856.5	-611.602	-479.801	-473
E3	18	-524.199	-409.801	-321	-324.5
E4	18	-739.199	-540.699	-406.398	-351.102
E5	18	-508.602	-397.398	-318.801	-309
E6	18	-892.301	-628.5	-449.5	-453.898
E7	18	-796.102	-573.5	-440.898	-419.801
E8	18	-977.801	-683.5	-483.602	-452.5
E9	18	-641.898	-478.102	-370	-366.898
E10	18	-632.801	-452.102	-346.301	-324.199
E11	18	-773.699	-538	-407.398	-395.898
E12	18	-668.5	-459.602	-348.301	-337.801
F1	18	-836.199	-612.102	-452.801	-457.398
F2	18	-600.102	-457.102	-345.102	-350.5
F3	18	-721.301	-538.801	-404.801	-389.699
F4	18	-635.5	-462	-366.602	-369.398
F5	18	-957.199	-671.699	-492.5	-472.5
F6	18	-697.801	-523.801	-397.801	-385.898
F7	18	-881.699	-636	-473.801	-447.5
F8	18	-715.102	-505.801	-396.102	-398
F9	18	-803.699	-577.699	-404.102	-419.102
F10	18	-554	-400.898	-292.398	-255.102
F11	18	-758.898	-540.199	-398.301	-374.102
F12	18	-565.102	-348.102	-247.398	-213.898
G1	18	-551.102	-436.102	-342.699	-321.801
G2	18	-710.301	-529.199	-395.199	-386.898
G3	18	-791.301	-576.102	-417.102	-421.699
G4	18	-608.801	-448.102	-350.699	-335.301
G5	18	-579.398	-416.5	-309	-309.602
G6	18	-909.898	-642.898	-452.5	-425.898
G7	18	-698.102	-532.102	-389	-382.5
G8	18	-1008.4	-692	-505.301	-463.398
G9	18	-760.398	-538.102	-404.398	-381.301
G10	18	-771.699	-548.102	-416	-394.699
G11	18	-809.102	-575.699	-421	-424.898
G12	18	-649.602	-466.801	-349.898	-334.199
H1	18	-862	-604.5	-427.699	-377.898
H2	18	-567.602	-431.301	-313.699	-332.699
H3	18	-895.5	-644.602	-473.602	-467
H4	18	-542.801	-407.602	-324.199	-304.898
H5	18	-854.398	-597	-451.699	-408.5
H6	18	-495.102	-364.898	-286.102	-291
H7	18	-1027.7	-712.199	-508.801	-496.699
H8	18	-620.398	-455.301	-338.398	-310.102
H9	18	-795.898	-559	-418.602	-406.199
H10	18	-664.699	-476.699	-356.102	-339.602
H11	18	-938.5	-647.898	-467.5	-452
H12	18	-955.898	-643	-440.5	-401.801
A1	19	13345.7	5882.2	4542	6546.5
A2	19	12739.6	5483	4162.6	5966
A3	19	14701.3	6436.7	4832.7	6717.4
A4	19	10345.8	4398.7	3371.7	4797.9
A5	19	13229.5	5638.5	4231.2	5999.3
A6	19	12755.3	5470.6	4228.2	6097
A7	19	14041.3	6088.7	4562.7	6379.9
A8	19	13387.8	5767.1	4309.9	6067.4
A9	19	13891.9	5929.9	4428	6194.8
A10	19	13937.7	5992	4509.1	6340.4
A11	19	13730.4	5805.4	4345.3	6080.4
A12	19	13764.1	5886	4546.3	6625.5
B1	19	10968.4	4731.7	3619.9	5273
B2	19	13919.9	5930.1	4368.4	6166.4
B3	19	12105.2	5160.5	3918	5563.9
B4	19	13272	5715.1	4301	6069.6
B5	19	12453.5	5307.8	3981.8	5581.9
B6	19	14958.4	6426.6	4811.3	6754.7
B7	19	13095.2	5580	4212.1	5889.9
B8	19	14819.4	6376.9	4707.5	6588.1
B9	19	12640.8	5351.5	3972.1	5591.7
B10	19	13337.5	5620.4	4185.3	5914.4
B11	19	12071.2	5148.9	3846.9	5445.9
B12	19	15176.9	6643.9	4905.9	6742.9
C1	19	15449.5	6778.6	5188.6	7374.2
C2	19	9366.5	3975.5	3069.4	4490.9
C3	19	11402	4858.5	3648.4	5140
C4	19	-671.398	-501.102	-382.398	-365.398
C5	19	-447.699	-365.801	-272.301	-288.699
C6	19	-839.199	-593.102	-436.398	-432
C7	19	-417.199	-330.301	-253.602	-258
C8	19	-907	-658.301	-483.602	-465.102
C9	19	-681.602	-516	-381.199	-347.301
C10	19	-819	-586	-425.801	-397.898
C11	19	-675.102	-488	-348.199	-320
C12	19	-712.801	-492.199	-311.102	-300.801
D1	19	-976.398	-680.898	-493.398	-492.199
D2	19	-534.602	-411.199	-319.398	-293.5
D3	19	-954.898	-671.102	-462.102	-465.602
D4	19	-553.801	-411.699	-336.5	-311.898
D5	19	-777.398	-564.102	-407.102	-403.699
D6	19	-529.898	-417.5	-319.301	-322.301
D7	19	-868	-613.801	-433.301	-410.398
D8	19	-638.898	-491.102	-364.5	-364.801
D9	19	-914.898	-664.5	-534.398	-655.398
D10	19	-865.898	-617.602	-451.199	-421.5
D11	19	-774.102	-540	-391.398	-376.398
D12	19	-445.199	-312	-255.898	-252.898
E1	19	-477.5	-383.801	-303	-260
E2	19	-823.5	-633.602	-472.801	-462
E3	19	-521.199	-415.801	-322	-313.5
E4	19	-729.199	-541.699	-405.398	-349.102
E5	19	-492.602	-384.398	-312.801	-294
E6	19	-864.301	-622.5	-462.5	-454.898
E7	19	-772.102	-574.5	-441.898	-422.801
E8	19	-961.801	-683.5	-487.602	-436.5
E9	19	-644.898	-476.102	-361	-357.898
E10	19	-628.801	-446.102	-329.301	-328.199
E11	19	-756.699	-530	-403.398	-392.898
E12	19	-654.5	-450.602	-340.301	-334.801
F1	19	-824.199	-604.102	-451.801	-437.398
F2	19	-600.102	-452.102	-356.102	-358.5
F3	19	-720.301	-522.801	-417.801	-379.699
F4	19	-621.5	-470	-375.602	-370.398
F5	19	-946.199	-689.699	-487.5	-460.5
F6	19	-726.801	-521.801	-390.801	-370.898
F7	19	-881.699	-621	-469.801	-441.5
F8	19	-706.102	-510.801	-390.102	-377
F9	19	-823.699	-580.699	-427.102	-415.102
F10	19	-553	-389.898	-281.398	-253.102
F11	19	-736.898	-522.199	-387.301	-381.102
F12	19	-529.102	-333.102	-227.398	-193.898
G1	19	-557.102	-420.102	-319.699	-318.801
G2	19	-688.301	-520.199	-397.199	-381.898
G3	19	-780.301	-562.102	-427.102	-421.699
G4	19	-591.801	-435.102	-330.699	-318.301
G5	19	-556.398	-415.5	-308	-299.602
G6	19	-879.898	-632.898	-445.5	-420.898
G7	19	-705.102	-527.102	-375	-377.5
G8	19	-992.398	-693	-479.301	-472.398
G9	19	-763.398	-544.102	-402.398	-381.301
G10	19	-773.699	-537.102	-406	-383.699
G11	19	-796.102	-583.699	-429	-422.898
G12	19	-637.602	-452.801	-343.898	-341.199
H1	19	-840	-570.5	-400.699	-384.898
H2	19	-581.602	-431.301	-341.699	-328.699
H3	19	-881.5	-635.602	-477.602	-474
H4	19	-524.801	-397.602	-312.199	-299.898
H5	19	-841.398	-587	-442.699	-410.5
H6	19	-488.102	-366.898	-294.102	-291
H7	19	-1014.7	-701.199	-500.801	-470.699
H8	19	-618.398	-433.301	-331.398	-313.102
H9	19	-791.898	-554	-406.602	-384.199
H10	19	-655.699	-481.699	-358.102	-344.602
H11	19	-914.5	-635.898	-456.5	-442
H12	19	-935.898	-618	-448.5	-398.801
A1	20	13350.7	5877.2	4526	6550.5
A2	20	12980.6	5599	4248.6	6106
A3	20	14742.3	6443.7	4838.7	6745.4
A4	20	10371.8	4396.7	3372.7	4813.9
A5	20	13257.5	5648.5	4230.2	5984.3
A6	20	12759.3	5477.6	4242.2	6094
A7	20	14037.3	6076.7	4557.7	6359.9
A8	20	13444.8	5759.1	4314.9	6085.4
A9	20	13779.9	5858.9	4366	6111.8
A10	20	13949.7	5989	4528.1	6337.4
A11	20	13791.4	5844.4	4361.3	6124.4
A12	20	13811.1	5902	4559.3	6637.5
B1	20	10896.4	4685.7	3609.9	5215
B2	20	14125.9	6028.1	4460.4	6304.4
B3	20	12178.2	5196.5	3931	5609.9
B4	20	13446	5788.1	4350	6145.6
B5	20	12441.5	5290.8	3970.8	5581.9
B6	20	15038.4	6460.6	4815.3	6799.7
B7	20	13098.2	5595	4201.1	5898.9
B8	20	14743.4	6348.9	4691.5	6571.1
B9	20	12526.8	5326.5	3956.1	5563.7
B10	20	13360.5	5615.4	4183.3	5906.4
B11	20	12087.2	5141.9	3815.9	5426.9
B12	20	15094.9	6607.9	4893.9	6708.9
C1	20	15365.5	6737.6	5157.6	7323.2
C2	20	9509.5	4047.5	3090.4	4519.9
C3	20	11437	4875.5	3655.4	5130
C4	20	-657.398	-518.102	-370.398	-358.398
C5	20	-443.699	-346.801	-277.301	-294.699
C6	20	-811.199	-587.102	-452.398	-415
C7	20	-435.199	-326.301	-259.602	-259
C8	20	-899	-637.301	-466.602	-470.102
C9	20	-677.602	-516	-384.199	-362.301
C10	20	-809	-583	-424.801	-397.898
C11	20	-657.102	-489	-346.199	-313
C12	20	-698.801	-490.199	-327.102	-295.801
D1	20	-959.398	-654.898	-492.398	-473.199
D2	20	-547.602	-420.199	-330.398	-301.5
D3	20	-920.898	-656.102	-452.102	-446.602
D4	20	-535.801	-417.699	-326.5	-321.898
D5	20	-747.398	-525.102	-412.102	-388.699
D6	20	-518.898	-416.5	-309.301	-310.301
D7	20	-852	-614.801	-427.301	-425.398
D8	20	-655.898	-475.102	-371.5	-379.801
D9	20	-897.898	-658.5	-536.398	-654.398
D10	20	-878.898	-609.602	-448.199	-435.5
D11	20	-747.102	-529	-378.398	-376.398
D12	20	-440.199	-312	-236.898	-253.898
E1	20	-486.5	-383.801	-294	-254
E2	20	-850.5	-631.602	-473.801	-461
E3	20	-528.199	-416.801	-320	-323.5
E4	20	-712.199	-542.699	-399.398	-358.102
E5	20	-509.602	-405.398	-316.801	-312
E6	20	-848.301	-615.5	-451.5	-430.898
E7	20	-788.102	-563.5	-440.898	-425.801
E8	20	-958.801	-675.5	-484.602	-439.5
E9	20	-633.898	-479.102	-363	-368.898
E10	20	-619.801	-456.102	-343.301	-318.199
E11	20	-752.699	-525	-400.398	-383.898
E12	20	-639.5	-439.602	-341.301	-337.801
F1	20	-812.199	-578.102	-444.801	-439.398
F2	20	-604.102	-454.102	-355.102	-354.5
F3	20	-695.301	-522.801	-382.801	-386.699
F4	20	-622.5	-471	-365.602	-372.398
F5	20	-934.199	-675.699	-490.5	-472.5
F6	20	-682.801	-524.801	-390.801	-368.898
F7	20	-905.699	-638	-472.801	-454.5
F8	20	-703.102	-507.801	-383.102	-377
F9	20	-798.699	-565.699	-422.102	-416.102
F10	20	-566	-383.898	-274.398	-243.102
F11	20	-722.898	-525.199	-392.301	-374.102
F12	20	-511.102	-321.102	-224.398	-203.898
G1	20	-540.102	-426.102	-322.699	-313.801
G2	20	-688.301	-511.199	-388.199	-382.898
G3	20	-771.301	-572.102	-426.102	-403.699
G4	20	-583.801	-436.102	-328.699	-324.301
G5	20	-530.398	-411.5	-310	-299.602
G6	20	-863.898	-620.898	-420.5	-419.898
G7	20	-700.102	-535.102	-388	-375.5
G8	20	-983.398	-677	-501.301	-475.398
G9	20	-734.398	-533.102	-399.398	-386.301
G10	20	-770.699	-541.102	-398	-386.699
G11	20	-790.102	-565.699	-414	-416.898
G12	20	-624.602	-448.801	-321.898	-327.199
H1	20	-828	-581.5	-414.699	-376.898
H2	20	-583.602	-423.301	-321.699	-326.699
H3	20	-868.5	-626.602	-465.602	-465
H4	20	-522.801	-402.602	-314.199	-305.898
H5	20	-803.398	-574	-426.699	-390.5
H6	20	-491.102	-360.898	-279.102	-292
H7	20	-999.699	-686.199	-515.801	-477.699
H8	20	-625.398	-443.301	-331.398	-313.102
H9	20	-778.898	-561	-418.602	-399.199
H10	20	-663.699	-475.699	-373.102	-350.602
H11	20	-898.5	-619.898	-450.5	-439
H12	20	-918.898	-612	-416.5	-393.801
A1	21	13331.7	5891.2	4529	6531.5
A2	21	13049.6	5633	4295.6	6155
A3	21	14784.3	6466.7	4855.7	6745.4
A4	21	10382.8	4410.7	3381.7	4807.9
A5	21	13341.5	5687.5	4248.2	6016.3
A6	21	12913.3	5527.6	4294.2	6171
A7	21	14057.3	6101.7	4571.7	6391.9
A8	21	13477.8	5787.1	4338.9	6086.4
A9	21	13905.9	5939.9	4426	6189.8
A10	21	13966.7	5996	4531.1	6348.4
A11	21	13769.4	5835.4	4358.3	6130.4
A12	21	13806.1	5891	4550.3	6636.5
B1	21	10998.4	4747.7	3624.9	5280
B2	21	14236.9	6094.1	4512.4	6371.4
B3	21	12260.2	5259.5	3968	5637.9
B4	21	13393	5781.1	4331	6124.6
B5	21	12613.5	5397.8	4043.8	5676.9
B6	21	14974.4	6408.6	4795.3	6747.7
B7	21	13181.2	5619	4228.1	5914.9
B8	21	14834.4	6384.9	4718.5	6585.1
B9	21	12607.8	5352.5	3973.1	5578.7
B10	21	13424.5	5660.4	4214.3	5932.4
B11	21	12086.2	5146.9	3841.9	5416.9
B12	21	15144.9	6637.9	4922.9	6728.9
C1	21	15427.5	6773.6	5184.6	7338.2
C2	21	9539.5	4054.5	3094.4	4526.9
C3	21	11455	4899.5	3666.4	5141
C4	21	-643.398	-488.102	-360.398	-343.398
C5	21	-445.699	-352.801	-270.301	-274.699
C6	21	-810.199	-580.102	-437.398	-417
C7	21	-417.199	-319.301	-248.602	-252
C8	21	-868	-629.301	-470.602	-460.102
C9	21	-659.602	-485	-364.199	-346.301
C10	21	-803	-568	-419.801	-384.898
C11	21	-673.102	-478	-352.199	-317
C12	21	-674.801	-463.199	-316.102	-287.801
D1	21	-930.398	-651.898	-474.398	-482.199
D2	21	-552.602	-412.199	-321.398	-306.5
D3	21	-912.898	-643.102	-458.102	-447.602
D4	21	-533.801	-425.699	-317.5	-316.898
D5	21	-749.398	-545.102	-411.102	-387.699
D6	21	-517.898	-406.5	-317.301	-322.301
D7	21	-833	-590.801	-429.301	-415.398
D8	21	-646.898	-464.102	-362.5	-365.801
D9	21	-889.898	-660.5	-529.398	-651.398
D10	21	-854.898	-615.602	-447.199	-418.5
D11	21	-729.102	-524	-389.398	-372.398
D12	21	-445.199	-320	-238.898	-251.898
E1	21	-461.5	-370.801	-276	-246
E2	21	-836.5	-618.602	-466.801	-451
E3	21	-504.199	-413.801	-306	-326.5
E4	21	-712.199	-514.699	-381.398	-329.102
E5	21	-469.602	-383.398	-301.801	-298
E6	21	-832.301	-590.5	-437.5	-429.898
E7	21	-772.102	-562.5	-433.898	-426.801
E8	21	-919.801	-659.5	-493.602	-424.5
E9	21	-633.898	-477.102	-357	-339.898
E10	21	-615.801	-451.102	-316.301	-330.199
E11	21	-724.699	-514	-392.398	-379.898
E12	21	-626.5	-450.602	-329.301	-332.801
F1	21	-789.199	-576.102	-441.801	-420.398
F2	21	-584.102	-458.102	-343.102	-331.5
F3	21	-711.301	-507.801	-393.801	-391.699
F4	21	-616.5	-453	-357.602	-369.398
F5	21	-894.199	-648.699	-476.5	-459.5
F6	21	-685.801	-501.801	-376.801	-360.898
F7	21	-881.699	-625	-465.801	-448.5
F8	21	-702.102	-499.801	-378.102	-376
F9	21	-777.699	-578.699	-413.102	-414.102
F10	21	-539	-381.898	-266.398	-245.102
F11	21	-706.898	-519.199	-365.301	-383.102
F12	21	-488.102	-314.102	-221.398	-188.898
G1	21	-535.102	-414.102	-329.699	-325.801
[truncated: 1,847 more rows]

## Sheet: Multicomponent Data
Block Type	96well
Chemistry	TAQMAN
Experiment File Name	C:\Users\11193327\Dropbox\Sami\Sams Tech Paper 2015\Figures\Figure 3\Final\JAG1\SK_11112015_No3_Final Figure.eds
Experiment Run End Time	Not Started
Instrument Type	steponeplus
Passive Reference	ROX
Well	Cycle	FAM	ROX
A1	1	5485.86	5575.59
A2	1	5377.4	5183.92
A3	1	6175.73	5769.47
A4	1	4446.85	4274.53
A5	1	5477.94	5077.62
A6	1	5364.08	5305.83
A7	1	5783.76	5398.81
A8	1	5655.96	5229.94
A9	1	5850.76	5301.23
A10	1	5829.56	5476.52
A11	1	5777.83	5283.93
A12	1	5895.13	5817
B1	1	4684.67	4624.66
B2	1	6005.25	5391.15
B3	1	5372.29	5013.53
B4	1	5430.44	5070.98
B5	1	5330.89	4862.83
B6	1	6293.52	5748.09
B7	1	5605.64	5130.19
B8	1	6259.07	5629.06
B9	1	5367.71	4826.68
B10	1	5743.86	5104.42
B11	1	5413.55	4926.42
B12	1	6401.88	5795.13
C1	1	6346.09	6257.85
C2	1	3991.99	3947.11
C3	1	4846.35	4483.02
C4	1
C5	1
C6	1
C7	1
C8	1
C9	1
C10	1
C11	1
C12	1
D1	1
D2	1
D3	1
D4	1
D5	1
D6	1
D7	1
D8	1
D9	1
D10	1
D11	1
D12	1
E1	1
E2	1
E3	1
E4	1
E5	1
E6	1
E7	1
E8	1
E9	1
E10	1
E11	1
E12	1
F1	1
F2	1
F3	1
F4	1
F5	1
F6	1
F7	1
F8	1
F9	1
F10	1
F11	1
F12	1
G1	1
G2	1
G3	1
G4	1
G5	1
G6	1
G7	1
G8	1
G9	1
G10	1
G11	1
G12	1
H1	1
H2	1
H3	1
H4	1
H5	1
H6	1
H7	1
H8	1
H9	1
H10	1
H11	1
H12	1
A1	2	5628.19	5683.19
A2	2	5565.56	5360.22
A3	2	6278.83	5859.81
A4	2	4497.03	4280.89
A5	2	5598.25	5178.6
A6	2	5435.45	5356.53
A7	2	5902.44	5475.72
A8	2	5729.47	5256.98
A9	2	5944.21	5382.94
A10	2	5921.93	5511.09
A11	2	5837.45	5270.23
A12	2	5932.77	5835.22
B1	2	4700.89	4626.22
B2	2	6019.04	5469.3
B3	2	5305.89	4939.54
B4	2	5563.59	5213.16
B5	2	5342.39	4878.09
B6	2	6289.94	5769.7
B7	2	5589.68	5126.66
B8	2	6183.16	5584.72
B9	2	5360.83	4821.11
B10	2	5665.87	5069.38
B11	2	5342.82	4862.05
B12	2	6488.31	5830.3
C1	2	6487.63	6336.04
C2	2	3994.68	3909.63
C3	2	4769.86	4397.75
C4	2
C5	2
C6	2
C7	2
C8	2
C9	2
C10	2
C11	2
C12	2
D1	2
D2	2
D3	2
D4	2
D5	2
D6	2
D7	2
D8	2
D9	2
D10	2
D11	2
D12	2
E1	2
E2	2
E3	2
E4	2
E5	2
E6	2
E7	2
E8	2
E9	2
E10	2
E11	2
E12	2
F1	2
F2	2
F3	2
F4	2
F5	2
F6	2
F7	2
F8	2
F9	2
F10	2
F11	2
F12	2
G1	2
G2	2
G3	2
G4	2
G5	2
G6	2
G7	2
G8	2
G9	2
G10	2
G11	2
G12	2
H1	2
H2	2
H3	2
H4	2
H5	2
H6	2
H7	2
H8	2
H9	2
H10	2
H11	2
H12	2
A1	3	5721.13	5710.99
A2	3	5683.63	5452.59
A3	3	6400.48	5935.17
A4	3	4572.75	4332.45
A5	3	5657.45	5192.38
A6	3	5548.29	5425.76
A7	3	6030.73	5552.13
A8	3	5781.63	5301.1
A9	3	6029.75	5425.69
A10	3	6014.13	5574.05
A11	3	5917.78	5308.31
A12	3	6047.64	5928.08
B1	3	4795.04	4698.97
B2	3	6075.11	5523.08
B3	3	5322.62	4955.22
B4	3	5616.59	5253.56
B5	3	5335.71	4825.48
B6	3	6341.33	5792.45
B7	3	5611.75	5133.65
B8	3	6276.91	5658.22
B9	3	5391.1	4842.98
B10	3	5683.1	5072.29
B11	3	5367.82	4866.99
B12	3	6522.09	5811.26
C1	3	6565.09	6371.67
C2	3	4009.95	3931.44
C3	3	4812.24	4438.65
C4	3
C5	3
C6	3
C7	3
C8	3
C9	3
C10	3
C11	3
C12	3
D1	3
D2	3
D3	3
D4	3
D5	3
D6	3
D7	3
D8	3
D9	3
D10	3
D11	3
D12	3
E1	3
E2	3
E3	3
E4	3
E5	3
E6	3
E7	3
E8	3
E9	3
E10	3
E11	3
E12	3
F1	3
F2	3
F3	3
F4	3
F5	3
F6	3
F7	3
F8	3
F9	3
F10	3
F11	3
F12	3
G1	3
G2	3
G3	3
G4	3
G5	3
G6	3
G7	3
G8	3
G9	3
G10	3
G11	3
G12	3
H1	3
H2	3
H3	3
H4	3
H5	3
H6	3
H7	3
H8	3
H9	3
H10	3
H11	3
H12	3
A1	4	5760.69	5769.48
A2	4	5736.71	5482.17
A3	4	6443.52	5953.59
A4	4	4613.08	4340.22
A5	4	5735.79	5253.19
A6	4	5607.94	5452.33
A7	4	6069.26	5572.85
A8	4	5842.62	5327.84
A9	4	6035.99	5405.59
A10	4	6079.08	5606.03
A11	4	5957.22	5318.76
A12	4	6048.33	5909.23
B1	4	4791.35	4660.2
B2	4	6083.09	5501.13
B3	4	5347.14	4966.76
B4	4	5640.23	5241.78
B5	4	5410.97	4899.03
B6	4	6374.61	5823.15
B7	4	5659.51	5182.89
B8	4	6292.43	5646.13
B9	4	5432.07	4889.43
B10	4	5718.81	5088
B11	4	5354.58	4841.82
B12	4	6593.64	5866.22
C1	4	6608.01	6405.73
C2	4	4041.32	3953.51
C3	4	4818.15	4411.63
C4	4
C5	4
C6	4
C7	4
C8	4
C9	4
C10	4
C11	4
C12	4
D1	4
D2	4
D3	4
D4	4
D5	4
D6	4
D7	4
D8	4
D9	4
D10	4
D11	4
D12	4
E1	4
E2	4
E3	4
E4	4
E5	4
E6	4
E7	4
E8	4
E9	4
E10	4
E11	4
E12	4
F1	4
F2	4
F3	4
F4	4
F5	4
F6	4
F7	4
F8	4
F9	4
F10	4
F11	4
F12	4
G1	4
G2	4
G3	4
G4	4
G5	4
G6	4
G7	4
G8	4
G9	4
G10	4
G11	4
G12	4
H1	4
H2	4
H3	4
H4	4
H5	4
H6	4
H7	4
H8	4
H9	4
H10	4
H11	4
H12	4
A1	5	5854.39	5808.92
A2	5	5747.88	5466.94
A3	5	6473.78	5948.67
A4	5	4628.59	4351.37
A5	5	5773.8	5265.92
A6	5	5681.3	5537.04
A7	5	6111.51	5589.89
A8	5	5862.83	5337.63
A9	5	6105.46	5461.93
A10	5	6106.14	5589.91
A11	5	5988.18	5333.66
A12	5	6058.38	5911.2
B1	5	4845.49	4710.66
B2	5	6094.1	5497.57
B3	5	5346.66	4954.31
B4	5	5680.75	5284.14
B5	5	5451.13	4943.65
B6	5	6379.02	5794.37
B7	5	5687.18	5169.84
B8	5	6335.93	5670.05
B9	5	5456.56	4885.58
B10	5	5743.63	5109.46
B11	5	5352.45	4856.28
B12	5	6626.81	5859.24
C1	5	6657.75	6432.16
C2	5	4051.53	3954.09
C3	5	4842.88	4422.28
C4	5
C5	5
C6	5
C7	5
C8	5
C9	5
C10	5
C11	5
C12	5
D1	5
D2	5
D3	5
D4	5
D5	5
D6	5
D7	5
D8	5
D9	5
D10	5
D11	5
D12	5
E1	5
E2	5
E3	5
E4	5
E5	5
E6	5
E7	5
E8	5
E9	5
E10	5
E11	5
E12	5
F1	5
F2	5
F3	5
F4	5
F5	5
F6	5
F7	5
F8	5
F9	5
F10	5
F11	5
F12	5
G1	5
G2	5
G3	5
G4	5
G5	5
G6	5
G7	5
G8	5
G9	5
G10	5
G11	5
G12	5
H1	5
H2	5
H3	5
H4	5
H5	5
H6	5
H7	5
H8	5
H9	5
H10	5
H11	5
H12	5
A1	6	5803.99	5780.78
A2	6	5749.26	5452.94
A3	6	6486.95	5962.36
A4	6	4634.98	4359.14
A5	6	5773.56	5248.57
A6	6	5628.88	5455.02
A7	6	6137.59	5600.43
A8	6	5889.68	5354.23
A9	6	6123.82	5472.06
A10	6	6135.87	5618.9
A11	6	6022.11	5356.45
A12	6	6110	5955.38
B1	6	4857.08	4716.93
B2	6	6107.82	5499.01
B3	6	5383.09	4980.04
B4	6	5744.63	5318.29
B5	6	5426.2	4889.39
B6	6	6438.87	5836.88
B7	6	5708.88	5195.81
B8	6	6328.27	5655.49
B9	6	5468.27	4854.82
B10	6	5764.14	5130.66
B11	6	5367.58	4852.12
B12	6	6607.67	5838.28
C1	6	6679.6	6460.79
C2	6	4081.75	3986.05
C3	6	4901.29	4468.95
C4	6
C5	6
C6	6
C7	6
C8	6
C9	6
C10	6
C11	6
C12	6
D1	6
D2	6
D3	6
D4	6
D5	6
D6	6
D7	6
D8	6
D9	6
D10	6
D11	6
D12	6
E1	6
E2	6
E3	6
E4	6
E5	6
E6	6
E7	6
E8	6
E9	6
E10	6
E11	6
E12	6
F1	6
F2	6
F3	6
F4	6
F5	6
F6	6
F7	6
F8	6
F9	6
F10	6
F11	6
F12	6
G1	6
G2	6
G3	6
G4	6
G5	6
G6	6
G7	6
G8	6
G9	6
G10	6
G11	6
G12	6
H1	6
H2	6
H3	6
H4	6
H5	6
H6	6
H7	6
H8	6
H9	6
H10	6
H11	6
H12	6
A1	7	5869.81	5823.45
A2	7	5767.01	5467.58
A3	7	6487.14	5981.62
A4	7	4628.55	4338.53
A5	7	5793.06	5261.16
A6	7	5683.33	5519.56
A7	7	6133.7	5596.61
A8	7	5886.74	5368.38
A9	7	6124.67	5470.43
A10	7	6144.53	5623.94
A11	7	6072.21	5380.53
A12	7	6128.79	5952.14
B1	7	4846.62	4706.06
B2	7	6113.17	5504.57
B3	7	5378.84	4994.5
B4	7	5740.66	5313.71
B5	7	5479.98	4957.48
B6	7	6439.23	5829.13
B7	7	5723.24	5223.42
B8	7	6360.01	5666.66
B9	7	5490.13	4888.94
B10	7	5796.97	5143.51
B11	7	5322.4	4804.1
B12	7	6629.38	5852.85
C1	7	6746.1	6504.99
C2	7	4095.48	3977.62
C3	7	4922.31	4481.16
C4	7
C5	7
C6	7
C7	7
C8	7
C9	7
C10	7
C11	7
C12	7
D1	7
D2	7
D3	7
D4	7
D5	7
D6	7
D7	7
D8	7
D9	7
D10	7
D11	7
D12	7
E1	7
E2	7
E3	7
E4	7
E5	7
E6	7
E7	7
E8	7
E9	7
E10	7
E11	7
E12	7
F1	7
F2	7
F3	7
F4	7
F5	7
F6	7
F7	7
F8	7
F9	7
F10	7
F11	7
F12	7
G1	7
G2	7
G3	7
G4	7
G5	7
G6	7
G7	7
G8	7
G9	7
G10	7
G11	7
G12	7
H1	7
H2	7
H3	7
H4	7
H5	7
H6	7
H7	7
H8	7
H9	7
H10	7
H11	7
H12	7
A1	8	5865.24	5822.45
A2	8	5762.56	5470.3
A3	8	6494.83	5982.47
A4	8	4612.64	4329.81
A5	8	5792.48	5247.66
A6	8	5637	5453.11
A7	8	6156.18	5613.23
A8	8	5874.48	5351.49
A9	8	6082.18	5423.07
A10	8	6212.86	5734.39
A11	8	6070.79	5403.07
A12	8	6133.23	5930.27
B1	8	4829.89	4665.22
B2	8	6129.89	5498.97
B3	8	5366.97	4971.59
B4	8	5523.2	5080.49
B5	8	5470.17	4926.57
B6	8	6473.46	5880.48
B7	8	5742.52	5203.04
B8	8	6377.04	5684.72
B9	8	5509.55	4918.12
B10	8	5787.94	5119.04
B11	8	5348.51	4824.8
B12	8	6642.85	5861.66
C1	8	6728.52	6501.45
C2	8	4113.35	3989.5
C3	8	4941.7	4485.54
C4	8
C5	8
C6	8
C7	8
C8	8
C9	8
C10	8
C11	8
C12	8
D1	8
D2	8
D3	8
D4	8
D5	8
D6	8
D7	8
D8	8
D9	8
D10	8
D11	8
D12	8
E1	8
E2	8
E3	8
E4	8
E5	8
E6	8
E7	8
E8	8
E9	8
E10	8
E11	8
E12	8
F1	8
F2	8
F3	8
F4	8
F5	8
F6	8
F7	8
F8	8
F9	8
F10	8
F11	8
F12	8
G1	8
G2	8
G3	8
G4	8
G5	8
G6	8
G7	8
G8	8
G9	8
G10	8
G11	8
G12	8
H1	8
H2	8
H3	8
H4	8
H5	8
H6	8
H7	8
H8	8
H9	8
H10	8
H11	8
H12	8
A1	9	5858.95	5792.86
A2	9	5776.29	5482.74
A3	9	6515.63	5986.79
A4	9	4617.86	4320.7
A5	9	5855.3	5324.37
A6	9	5654.49	5480.06
A7	9	6179.57	5629.03
A8	9	5883.18	5354.73
A9	9	6138.66	5475.9
A10	9	6181.31	5650.33
A11	9	6095.49	5427.57
A12	9	6149.66	5972.33
B1	9	4881.54	4725.74
B2	9	6148.58	5536.21
B3	9	5346.71	4944.49
B4	9	5675.87	5241.96
B5	9	5497.11	4961.72
B6	9	6508.83	5890.19
B7	9	5739.73	5201.71
B8	9	6409.44	5688.42
B9	9	5511.93	4902.54
B10	9	5822.25	5148.27
B11	9	5362.16	4814.07
B12	9	6646.15	5848.23
C1	9	6778.64	6513.3
C2	9	4118.74	4010.38
C3	9	4969.69	4506.04
C4	9
C5	9
C6	9
C7	9
C8	9
C9	9
C10	9
C11	9
C12	9
D1	9
D2	9
D3	9
D4	9
D5	9
D6	9
D7	9
D8	9
D9	9
D10	9
D11	9
D12	9
E1	9
E2	9
E3	9
E4	9
E5	9
E6	9
E7	9
E8	9
E9	9
E10	9
E11	9
E12	9
F1	9
F2	9
F3	9
F4	9
F5	9
F6	9
F7	9
F8	9
F9	9
F10	9
F11	9
F12	9
G1	9
G2	9
G3	9
G4	9
G5	9
G6	9
G7	9
G8	9
G9	9
G10	9
G11	9
G12	9
H1	9
H2	9
H3	9
H4	9
H5	9
H6	9
H7	9
H8	9
H9	9
H10	9
H11	9
H12	9
A1	10	5887.01	5826.06
A2	10	5764.84	5457.8
A3	10	6501.91	5995.47
A4	10	4633.33	4343.42
A5	10	5889.66	5335.71
A6	10	5689.19	5512.16
A7	10	6183.97	5630.59
A8	10	5892.71	5345.07
A9	10	6079.06	5414.4
A10	10	6199.74	5677.03
A11	10	6120.41	5449.71
A12	10	6124.05	5939.97
B1	10	4851.43	4694.48
B2	10	6175.77	5530.42
B3	10	5404.6	4994.99
B4	10	5568.08	5112.58
B5	10	5544.7	5033.82
B6	10	6529.85	5909.08
B7	10	5762.88	5180.57
B8	10	6423.47	5717.2
B9	10	5536.83	4943.3
B10	10	5830	5156.49
B11	10	5358.49	4810.03
B12	10	6692.24	5900.05
C1	10	6787.36	6550.63
C2	10	4123.27	3976.25
C3	10	4981.62	4516.23
C4	10
C5	10
C6	10
C7	10
C8	10
C9	10
C10	10
C11	10
C12	10
D1	10
D2	10
D3	10
D4	10
D5	10
D6	10
D7	10
D8	10
D9	10
D10	10
D11	10
D12	10
E1	10
E2	10
E3	10
E4	10
E5	10
E6	10
E7	10
E8	10
E9	10
E10	10
E11	10
E12	10
F1	10
F2	10
F3	10
F4	10
F5	10
F6	10
F7	10
F8	10
F9	10
F10	10
F11	10
F12	10
G1	10
G2	10
G3	10
G4	10
G5	10
G6	10
G7	10
G8	10
G9	10
G10	10
G11	10
G12	10
H1	10
H2	10
H3	10
H4	10
H5	10
H6	10
H7	10
H8	10
H9	10
H10	10
H11	10
H12	10
A1	11	5881.9	5828.86
A2	11	5774.73	5470.6
A3	11	6492.02	5970.63
A4	11	4637.48	4348.28
A5	11	5859.22	5312.3
A6	11	5631.69	5428.09
A7	11	6176.73	5621.6
A8	11	5889.14	5332.76
A9	11	6059.94	5381.68
A10	11	6193.42	5651.04
A11	11	6113.79	5440.1
A12	11	6091.14	5897.79
B1	11	4842.16	4679.74
B2	11	6162.04	5516.41
B3	11	5368.76	4970.24
B4	11	5834.62	5386.39
B5	11	5491.55	4944.34
B6	11	6554.44	5935.86
B7	11	5764.2	5216.9
B8	11	6446.74	5705.43
B9	11	5531.22	4912.38
B10	11	5828.91	5165.93
B11	11	5372.65	4822.59
B12	11	6738.38	5931.32
C1	11	6789.6	6528.6
C2	11	4123.94	3999.91
C3	11	4990.55	4495.07
C4	11
C5	11
C6	11
C7	11
C8	11
C9	11
C10	11
C11	11
C12	11
D1	11
D2	11
D3	11
D4	11
D5	11
D6	11
D7	11
D8	11
D9	11
D10	11
D11	11
D12	11
E1	11
E2	11
E3	11
E4	11
E5	11
E6	11
E7	11
E8	11
E9	11
E10	11
E11	11
E12	11
F1	11
F2	11
F3	11
F4	11
F5	11
F6	11
F7	11
F8	11
F9	11
F10	11
F11	11
F12	11
G1	11
G2	11
G3	11
G4	11
G5	11
G6	11
G7	11
G8	11
G9	11
G10	11
G11	11
G12	11
H1	11
H2	11
H3	11
H4	11
H5	11
H6	11
H7	11
H8	11
H9	11
H10	11
H11	11
H12	11
A1	12	5878.2	5814.54
A2	12	5799.37	5509
A3	12	6496.93	5974.65
A4	12	4619.69	4318.98
A5	12	5828.42	5255.21
A6	12	5635.2	5443.99
A7	12	6190.72	5640.83
A8	12	5906.56	5355.03
A9	12	6113.13	5461.61
A10	12	6176.01	5645.17
A11	12	6100.44	5429.28
A12	12	6113.23	5922.47
B1	12	4887.86	4722.08
B2	12	6202.76	5553.46
B3	12	5344.54	4932.23
B4	12	5786.53	5325.62
B5	12	5468.09	4897.83
B6	12	6554.95	5923.78
B7	12	5768.25	5192.94
B8	12	6458	5745.77
B9	12	5547.04	4906.61
B10	12	5836.76	5171.04
B11	12	5387.93	4852.1
B12	12	6711.3	5910.18
C1	12	6804.6	6517.67
C2	12	4127.13	3989.81
C3	12	5007.38	4536.69
C4	12
C5	12
C6	12
C7	12
C8	12
C9	12
C10	12
C11	12
C12	12
D1	12
D2	12
D3	12
D4	12
D5	12
D6	12
D7	12
D8	12
D9	12
D10	12
D11	12
D12	12
E1	12
E2	12
E3	12
E4	12
E5	12
E6	12
E7	12
E8	12
E9	12
E10	12
E11	12
E12	12
F1	12
F2	12
F3	12
F4	12
F5	12
F6	12
F7	12
F8	12
F9	12
F10	12
F11	12
F12	12
G1	12
G2	12
G3	12
G4	12
G5	12
G6	12
G7	12
G8	12
G9	12
G10	12
G11	12
G12	12
H1	12
H2	12
H3	12
H4	12
H5	12
H6	12
H7	12
H8	12
H9	12
H10	12
H11	12
H12	12
A1	13	5876.09	5822.54
A2	13	5790.83	5478.11
A3	13	6525.92	5986.69
A4	13	4641.14	4335.89
A5	13	5868.27	5334.28
A6	13	5688.25	5501.46
A7	13	6190.24	5654.74
A8	13	5919.27	5352.06
A9	13	6078.27	5399.85
A10	13	6204	5670.33
A11	13	6110.57	5429.49
A12	13	6146.16	5954.38
B1	13	4869.09	4700.31
B2	13	6192.03	5525.38
B3	13	5386.92	4972.73
B4	13	5825.95	5353.59
B5	13	5545.31	4993.67
B6	13	6581.77	5948.54
B7	13	5789.36	5202.75
B8	13	6498.84	5770.79
B9	13	5549.19	4935.79
B10	13	5835.21	5141.5
B11	13	5399.93	4851.96
B12	13	6718.79	5920.6
C1	13	6739.36	6453.79
C2	13	4126.66	3993.18
C3	13	5023.67	4536.25
C4	13
C5	13
C6	13
C7	13
C8	13
C9	13
C10	13
C11	13
C12	13
D1	13
D2	13
D3	13
D4	13
D5	13
D6	13
D7	13
D8	13
D9	13
D10	13
D11	13
D12	13
E1	13
E2	13
E3	13
E4	13
E5	13
E6	13
E7	13
E8	13
E9	13
E10	13
E11	13
E12	13
F1	13
F2	13
F3	13
F4	13
F5	13
F6	13
F7	13
F8	13
F9	13
F10	13
F11	13
F12	13
G1	13
G2	13
G3	13
G4	13
G5	13
G6	13
G7	13
G8	13
G9	13
G10	13
G11	13
G12	13
H1	13
H2	13
H3	13
H4	13
H5	13
H6	13
H7	13
H8	13
H9	13
H10	13
H11	13
H12	13
A1	14	5914.86	5859.31
A2	14	5776.94	5485.75
A3	14	6500.76	5959.34
A4	14	4623.39	4312.31
A5	14	5847.37	5282.02
A6	14	5650.56	5440.21
A7	14	6181.27	5621.26
A8	14	5936.37	5356.47
A9	14	6140.67	5459.3
A10	14	6205.54	5660.66
A11	14	6085.17	5399.67
A12	14	6118.5	5927.28
B1	14	4865.39	4683.5
B2	14	6196.28	5517.55
B3	14	5362.57	4941.26
B4	14	5857.61	5396.93
B5	14	5496.47	4938.98
B6	14	6591.7	5933.86
B7	14	5801.3	5231.36
B8	14	6479.09	5749.63
B9	14	5548.58	4905.74
B10	14	5850.64	5156.91
B11	14	5398.04	4850.25
B12	14	6751.6	5952.52
C1	14	6748.04	6480.34
C2	14	4137.34	3977.87
C3	14	4991.18	4500.85
C4	14
C5	14
C6	14
C7	14
C8	14
C9	14
C10	14
C11	14
C12	14
D1	14
D2	14
D3	14
D4	14
D5	14
D6	14
D7	14
D8	14
D9	14
D10	14
D11	14
D12	14
E1	14
E2	14
E3	14
E4	14
E5	14
E6	14
E7	14
E8	14
E9	14
E10	14
E11	14
E12	14
F1	14
F2	14
F3	14
F4	14
F5	14
F6	14
F7	14
F8	14
F9	14
F10	14
F11	14
F12	14
G1	14
G2	14
G3	14
G4	14
G5	14
G6	14
G7	14
G8	14
G9	14
G10	14
G11	14
G12	14
H1	14
H2	14
H3	14
H4	14
H5	14
H6	14
H7	14
H8	14
H9	14
H10	14
H11	14
H12	14
A1	15	5936.38	5872.18
A2	15	5765.71	5460.07
A3	15	6516.12	5969.58
A4	15	4620.83	4320.02
A5	15	5872.45	5307.2
A6	15	5649.45	5438.41
A7	15	6202.89	5644.27
A8	15	5945.81	5377.39
A9	15	6150.12	5457.72
A10	15	6192.01	5635.47
A11	15	6086.19	5398.69
A12	15	6096.12	5907.21
B1	15	4852.4	4671.76
B2	15	6194.32	5514.17
B3	15	5381.15	4960.04
B4	15	5849.61	5382.78
B5	15	5514.72	4949.16
B6	15	6617.04	5960.27
B7	15	5802.04	5209.26
B8	15	6480.73	5733.89
B9	15	5512.13	4862.64
B10	15	5868.86	5174.65
B11	15	5406.73	4850.37
B12	15	6785.4	5970.9
C1	15	6772.57	6486.49
C2	15	4169.14	4017.18
C3	15	4993.09	4490.18
C4	15
C5	15
C6	15
C7	15
C8	15
C9	15
C10	15
C11	15
C12	15
D1	15
D2	15
D3	15
D4	15
D5	15
D6	15
D7	15
D8	15
D9	15
D10	15
D11	15
D12	15
E1	15
E2	15
E3	15
E4	15
E5	15
E6	15
E7	15
E8	15
E9	15
E10	15
E11	15
E12	15
F1	15
F2	15
F3	15
F4	15
F5	15
F6	15
F7	15
F8	15
F9	15
F10	15
F11	15
F12	15
G1	15
G2	15
G3	15
G4	15
G5	15
G6	15
G7	15
G8	15
G9	15
G10	15
G11	15
G12	15
H1	15
H2	15
H3	15
H4	15
H5	15
H6	15
H7	15
H8	15
H9	15
H10	15
H11	15
H12	15
A1	16	5945.09	5874.19
A2	16	5752.12	5416.96
A3	16	6508.17	5956.23
A4	16	4601.67	4302.89
A5	16	5873.11	5290.99
A6	16	5654.07	5445.59
A7	16	6197.11	5628.97
A8	16	5976.4	5385.79
A9	16	6117.22	5430.65
A10	16	6199.57	5636.15
A11	16	6095.27	5408.72
A12	16	6115.28	5880.16
B1	16	4862.71	4700.32
B2	16	6220.51	5526.48
B3	16	5352.24	4929.15
B4	16	5895.71	5420.98
B5	16	5522.99	4950.71
B6	16	6618.68	5979.71
B7	16	5835.41	5256.07
B8	16	6482.45	5727.22
B9	16	5553.5	4899.96
B10	16	5886.64	5181.17
B11	16	5355.16	4796.52
B12	16	6785.6	5979.96
C1	16	6829.41	6546.07
C2	16	4142.56	3974.22
C3	16	5050.52	4560.47
C4	16
C5	16
C6	16
C7	16
C8	16
C9	16
C10	16
C11	16
C12	16
D1	16
D2	16
D3	16
D4	16
D5	16
D6	16
D7	16
D8	16
D9	16
D10	16
D11	16
D12	16
E1	16
E2	16
E3	16
E4	16
E5	16
E6	16
E7	16
E8	16
E9	16
E10	16
E11	16
E12	16
F1	16
F2	16
F3	16
F4	16
F5	16
F6	16
F7	16
F8	16
F9	16
F10	16
F11	16
F12	16
G1	16
G2	16
G3	16
G4	16
G5	16
G6	16
G7	16
G8	16
G9	16
G10	16
G11	16
G12	16
H1	16
H2	16
H3	16
H4	16
H5	16
H6	16
H7	16
H8	16
H9	16
H10	16
H11	16
H12	16
A1	17	5941.43	5867.43
A2	17	5793.55	5494.32
A3	17	6549.36	5997.81
A4	17	4610.2	4302.27
A5	17	5870.99	5287.91
A6	17	5700.98	5506.17
A7	17	6223.65	5652.67
A8	17	5953.05	5369.53
A9	17	6183.11	5479.36
A10	17	6194.58	5609.93
A11	17	6074.53	5360.64
A12	17	6130.26	5950.79
B1	17	4859.5	4691.93
B2	17	6270.22	5589.35
B3	17	5408.92	5001.54
B4	17	5900.15	5419.86
B5	17	5536.34	4952.2
B6	17	6603.97	5936.57
B7	17	5814.51	5217.07
B8	17	6543.4	5767.25
B9	17	5587.46	4894.34
B10	17	5889.91	5186.51
B11	17	5362.46	4829.4
B12	17	6757.44	5938.8
C1	17	6818.91	6538.52
C2	17	4159.2	3992.87
C3	17	5055.1	4533.78
C4	17
C5	17
C6	17
C7	17
C8	17
C9	17
C10	17
C11	17
C12	17
D1	17
D2	17
D3	17
D4	17
D5	17
D6	17
D7	17
D8	17
D9	17
D10	17
D11	17
D12	17
E1	17
E2	17
E3	17
E4	17
E5	17
E6	17
E7	17
E8	17
E9	17
E10	17
E11	17
E12	17
F1	17
F2	17
F3	17
F4	17
F5	17
F6	17
F7	17
F8	17
F9	17
F10	17
F11	17
F12	17
G1	17
G2	17
G3	17
G4	17
G5	17
G6	17
G7	17
G8	17
G9	17
G10	17
G11	17
G12	17
H1	17
H2	17
H3	17
H4	17
H5	17
H6	17
H7	17
H8	17
H9	17
H10	17
H11	17
H12	17
A1	18	5952.81	5885.05
A2	18	5734.38	5403.86
A3	18	6573.19	5986.4
A4	18	4601.94	4291.38
A5	18	5913.1	5311.44
A6	18	5698.98	5493.81
A7	18	6233.76	5635.35
A8	18	5980.7	5375.24
A9	18	6134.75	5418.07
A10	18	6209.22	5642.38
A11	18	6105.81	5397.25
A12	18	6130.69	5931.09
B1	18	4834.42	4641.94
B2	18	6208.22	5479.75
B3	18	5432.46	4996.51
B4	18	5884.45	5386.78
B5	18	5558.97	4974.77
B6	18	6634.57	5968.96
B7	18	5831.86	5224.22
B8	18	6526.36	5750.11
B9	18	5579.68	4943.66
B10	18	5905.22	5215.15
B11	18	5355.51	4787.04
B12	18	6762.26	5953.55
C1	18	6800.19	6506.47
C2	18	4179.79	4039.06
C3	18	5046.1	4524.4
C4	18
C5	18
C6	18
C7	18
C8	18
C9	18
C10	18
C11	18
C12	18
D1	18
D2	18
D3	18
D4	18
D5	18
D6	18
D7	18
D8	18
D9	18
D10	18
D11	18
D12	18
E1	18
E2	18
E3	18
E4	18
E5	18
E6	18
E7	18
E8	18
E9	18
E10	18
E11	18
E12	18
F1	18
F2	18
F3	18
F4	18
F5	18
F6	18
F7	18
F8	18
F9	18
F10	18
F11	18
F12	18
G1	18
G2	18
G3	18
G4	18
G5	18
G6	18
G7	18
G8	18
G9	18
G10	18
G11	18
G12	18
H1	18
H2	18
H3	18
H4	18
H5	18
H6	18
H7	18
H8	18
H9	18
H10	18
H11	18
H12	18
A1	19	5938.12	5859.69
A2	19	5670.82	5318.1
A3	19	6561.48	5978.08
A4	19	4589.67	4278.68
A5	19	5876.84	5296.32
A6	19	5660.06	5432.67
A7	19	6267.57	5672.27
A8	19	5961.4	5370.46
A9	19	6191.76	5483.37
A10	19	6204.36	5635.81
A11	19	6107.28	5381.72
A12	19	6109.41	5906.67
B1	19	4864.52	4688.98
B2	19	6197.14	5441.64
B3	19	5375.7	4938.4
B4	19	5903.35	5402.19
B5	19	5535.36	4926.3
B6	19	6654.07	5970.44
B7	19	5830.44	5226.47
B8	19	6601.82	5810.63
B9	19	5626.88	4933.28
B10	19	5921.38	5220.47
B11	19	5372.65	4828.05
B12	19	6786.12	5968.27
C1	19	6876.89	6579.71
C2	19	4155.21	4008.82
C3	19	5066.65	4548.33
C4	19
C5	19
C6	19
C7	19
C8	19
C9	19
C10	19
C11	19
C12	19
D1	19
D2	19
D3	19
D4	19
D5	19
D6	19
D7	19
D8	19
D9	19
D10	19
D11	19
D12	19
E1	19
E2	19
E3	19
E4	19
E5	19
E6	19
E7	19
E8	19
E9	19
E10	19
E11	19
E12	19
F1	19
F2	19
F3	19
F4	19
F5	19
F6	19
F7	19
F8	19
F9	19
F10	19
F11	19
F12	19
G1	19
G2	19
G3	19
G4	19
G5	19
G6	19
G7	19
G8	19
G9	19
G10	19
G11	19
G12	19
H1	19
H2	19
H3	19
H4	19
H5	19
H6	19
H7	19
H8	19
H9	19
H10	19
H11	19
H12	19
A1	20	5938.42	5858.22
A2	20	5779.05	5444.88
A3	20	6577.22	6001.23
A4	20	4598.58	4291.18
A5	20	5889.98	5279.67
A6	20	5663.42	5433.58
A7	20	6264.86	5653.54
A8	20	5981.26	5383.45
A9	20	6138.64	5402.33
A10	20	6209.31	5637.92
A11	20	6135.63	5419.45
A12	20	6130.02	5916.66
B1	20	4831.78	4641.83
B2	20	6289.21	5572.12
B3	20	5407.92	4976
B4	20	5980.35	5467.64
B5	20	5527.51	4924.68
B6	20	6688.36	6003.81
B7	20	5833.23	5230.45
B8	20	6568.2	5798.22
B9	20	5579.63	4914.1
B10	20	5929.74	5210.85
B11	20	5377.52	4800.46
B12	20	6749.84	5942.58
C1	20	6839.26	6533.43
C2	20	4221.56	4026.21
C3	20	5083.7	4537.76
C4	20
C5	20
C6	20
C7	20
C8	20
C9	20
C10	20
C11	20
C12	20
D1	20
D2	20
D3	20
D4	20
D5	20
D6	20
D7	20
D8	20
D9	20
D10	20
D11	20
D12	20
E1	20
E2	20
E3	20
E4	20
E5	20
E6	20
E7	20
E8	20
E9	20
E10	20
E11	20
E12	20
F1	20
F2	20
F3	20
F4	20
F5	20
F6	20
F7	20
F8	20
F9	20
F10	20
F11	20
F12	20
G1	20
G2	20
G3	20
G4	20
G5	20
G6	20
G7	20
G8	20
G9	20
G10	20
G11	20
G12	20
H1	20
H2	20
H3	20
H4	20
H5	20
H6	20
H7	20
H8	20
H9	20
H10	20
H11	20
H12	20
A1	21	5934.54	5843.19
A2	21	5810.53	5495.91
A3	21	6597.82	6001.83
A4	21	4605.77	4287.04
A5	21	5927.81	5305.03
A6	21	5728.94	5503.1
A7	21	6275.61	5683.92
A8	21	5999.44	5387.65
A9	21	6198.98	5476.69
A10	21	6216.57	5646.99
A11	21	6125.25	5426.18
A12	21	6125.99	5913.9
B1	21	4878.54	4693.53
B2	21	6341.47	5636.06
B3	21	5449.87	5002.88
B4	21	5959.17	5447.87
B5	21	5609.35	5013.02
B6	21	6656.98	5958.57
B7	21	5869.39	5244.88
B8	21	6609.46	5809.63
B9	21	5615.02	4924.72
B10	21	5961.66	5236.41
B11	21	5379.38	4799.22
B12	21	6774.12	5963.8
C1	21	6869.3	6548.23
C2	21	4234.08	4030.85
C3	21	5094.46	4548.53
C4	21
C5	21
C6	21
C7	21
C8	21
C9	21
C10	21
C11	21
C12	21
D1	21
D2	21
D3	21
D4	21
D5	21
D6	21
D7	21
D8	21
D9	21
D10	21
D11	21
D12	21
E1	21
E2	21
E3	21
E4	21
E5	21
E6	21
E7	21
E8	21
E9	21
E10	21
E11	21
E12	21
F1	21
F2	21
F3	21
F4	21
F5	21
F6	21
F7	21
F8	21
F9	21
F10	21
F11	21
F12	21
G1	21
[truncated: 1,847 more rows]

## Sheet: Amplification Data
Block Type	96well
Chemistry	TAQMAN
Experiment File Name	C:\Users\11193327\Dropbox\Sami\Sams Tech Paper 2015\Figures\Figure 3\Final\JAG1\SK_11112015_No3_Final Figure.eds
Experiment Run End Time	Not Started
Instrument Type	steponeplus
Passive Reference	ROX
Well	Cycle	Target Name	Rn	ΔRn
A1	1	JAG1	0.983906	0
A1	2	JAG1	0.990323	0.00641668
A1	3	JAG1	1.00178	0.0178697
A1	4	JAG1	0.998476	0.0145696
A1	5	JAG1	1.00783	0.0239227
A1	6	JAG1	1.00401	0.0201086
A1	7	JAG1	1.00796	0.0240542
A1	8	JAG1	1.00735	0.0234436
A1	9	JAG1	1.01141	0.0275035
A1	10	JAG1	1.01046	0.0265546
A1	11	JAG1	1.0091	0.0251927
A1	12	JAG1	1.01095	0.0270432
A1	13	JAG1	1.0092	0.0252906
A1	14	JAG1	1.00948	0.0255753
A1	15	JAG1	1.01093	0.0270262
A1	16	JAG1	1.01207	0.0281633
A1	17	JAG1	1.01261	0.0287056
A1	18	JAG1	1.01151	0.0276068
A1	19	JAG1	1.01338	0.029478
A1	20	JAG1	1.01369	0.0297841
A1	21	JAG1	1.01563	0.0317284
A1	22	JAG1	1.01993	0.0360224
A1	23	JAG1	1.02258	0.0386719
A1	24	JAG1	1.02643	0.0425196
A1	25	JAG1	1.04531	0.061404
A1	26	JAG1	1.0704	0.0864921
A1	27	JAG1	1.11392	0.130012
A1	28	JAG1	1.18798	0.20407
A1	29	JAG1	1.30811	0.324204
A1	30	JAG1	1.47573	0.491821
A1	31	JAG1	1.6736	0.68969
A1	32	JAG1	1.89386	0.909953
A1	33	JAG1	2.11127	1.12736
A1	34	JAG1	2.33609	1.35219
A1	35	JAG1	2.54653	1.56262
A1	36	JAG1	2.75643	1.77253
A1	37	JAG1	2.92833	1.94442
A1	38	JAG1	3.09548	2.11158
A1	39	JAG1	3.25818	2.27427
A1	40	JAG1	3.37896	2.39505
A2	1	JAG1	1.03732	0
A2	2	JAG1	1.03831	0.000984192
A2	3	JAG1	1.04237	0.00504732
A2	4	JAG1	1.04643	0.00910699
A2	5	JAG1	1.05139	0.0140653
A2	6	JAG1	1.05434	0.0170164
A2	7	JAG1	1.05477	0.0174414
A2	8	JAG1	1.05343	0.0161027
A2	9	JAG1	1.05354	0.0162157
A2	10	JAG1	1.05626	0.0189333
A2	11	JAG1	1.05559	0.0182697
A2	12	JAG1	1.05271	0.0153822
A2	13	JAG1	1.05708	0.01976
A2	14	JAG1	1.05308	0.0157568
A2	15	JAG1	1.05598	0.0186516
A2	16	JAG1	1.06187	0.0245482
A2	17	JAG1	1.05446	0.0171369
A2	18	JAG1	1.06116	0.0238385
A2	19	JAG1	1.06633	0.0290004
A2	20	JAG1	1.06137	0.0240483
A2	21	JAG1	1.05725	0.0199208
A2	22	JAG1	1.06322	0.025893
A2	23	JAG1	1.064	0.0266734
A2	24	JAG1	1.07257	0.0352488
A2	25	JAG1	1.07751	0.0401809
A2	26	JAG1	1.0975	0.0601703
A2	27	JAG1	1.1275	0.0901707
A2	28	JAG1	1.19008	0.15275
A2	29	JAG1	1.29271	0.255388
A2	30	JAG1	1.43773	0.400407
A2	31	JAG1	1.625	0.587675
A2	32	JAG1	1.86632	0.828995
A2	33	JAG1	2.10956	1.07223
A2	34	JAG1	2.35789	1.32057
A2	35	JAG1	2.59913	1.5618
A2	36	JAG1	2.82176	1.78444
A2	37	JAG1	3.03004	1.99271
A2	38	JAG1	3.22134	2.18402
A2	39	JAG1	3.39894	2.36161
A2	40	JAG1	3.56964	2.53232
A3	1	JAG1	1.07042	0
A3	2	JAG1	1.07151	0.00109148
A3	3	JAG1	1.0784	0.00798094
A3	4	JAG1	1.08229	0.0118759
A3	5	JAG1	1.08827	0.0178573
A3	6	JAG1	1.08798	0.0175668
A3	7	JAG1	1.08451	0.0140952
A3	8	JAG1	1.08564	0.0152266
A3	9	JAG1	1.08833	0.0179173
A3	10	JAG1	1.08447	0.0140541
A3	11	JAG1	1.08733	0.0169096
A3	12	JAG1	1.08742	0.0170004
A3	13	JAG1	1.09007	0.0196551
A3	14	JAG1	1.09085	0.0204365
A3	15	JAG1	1.09155	0.021137
A3	16	JAG1	1.09267	0.0222493
A3	17	JAG1	1.09196	0.0215429
A3	18	JAG1	1.09802	0.0276043
A3	19	JAG1	1.09759	0.0271741
A3	20	JAG1	1.09598	0.0255626
A3	21	JAG1	1.0993	0.0288841
A3	22	JAG1	1.10066	0.0302432
A3	23	JAG1	1.10602	0.0356035
A3	24	JAG1	1.11316	0.0427469
A3	25	JAG1	1.12252	0.052108
A3	26	JAG1	1.14525	0.0748323
A3	27	JAG1	1.18956	0.119144
A3	28	JAG1	1.25771	0.187294
A3	29	JAG1	1.37254	0.302124
A3	30	JAG1	1.52397	0.453554
A3	31	JAG1	1.72036	0.649944
A3	32	JAG1	1.94484	0.874428
A3	33	JAG1	2.1729	1.10248
A3	34	JAG1	2.40583	1.33541
A3	35	JAG1	2.63277	1.56235
A3	36	JAG1	2.84455	1.77414
A3	37	JAG1	3.05133	1.98091
A3	38	JAG1	3.2417	2.17129
A3	39	JAG1	3.42231	2.3519
A3	40	JAG1	3.58524	2.51483
A4	1	JAG1	1.04031	0
A4	2	JAG1	1.05049	0.0101773
A4	3	JAG1	1.05547	0.0151533
A4	4	JAG1	1.06287	0.0225537
A4	5	JAG1	1.06371	0.0233952
A4	6	JAG1	1.06328	0.0229653
A4	7	JAG1	1.06685	0.0265336
A4	8	JAG1	1.06532	0.025009
A4	9	JAG1	1.06878	0.028463
A4	10	JAG1	1.06675	0.0264333
A4	11	JAG1	1.06651	0.0261952
A4	12	JAG1	1.06962	0.0293097
A4	13	JAG1	1.0704	0.0300882
A4	14	JAG1	1.07214	0.0318229
A4	15	JAG1	1.06963	0.0293195
A4	16	JAG1	1.06944	0.0291221
A4	17	JAG1	1.07157	0.0312605
A4	18	JAG1	1.07237	0.0320541
A4	19	JAG1	1.07269	0.0323716
A4	20	JAG1	1.07164	0.0313216
A4	21	JAG1	1.07434	0.0340314
A4	22	JAG1	1.08088	0.040567
A4	23	JAG1	1.07863	0.0383128
A4	24	JAG1	1.08268	0.0423692
A4	25	JAG1	1.09407	0.0537612
A4	26	JAG1	1.10789	0.0675808
A4	27	JAG1	1.12823	0.0879186
A4	28	JAG1	1.17815	0.137838
A4	29	JAG1	1.25844	0.218126
A4	30	JAG1	1.39	0.349688
A4	31	JAG1	1.56664	0.526325
A4	32	JAG1	1.80009	0.759778
A4	33	JAG1	2.0442	1.00389
A4	34	JAG1	2.30261	1.2623
A4	35	JAG1	2.55849	1.51817
A4	36	JAG1	2.80051	1.7602
A4	37	JAG1	3.01918	1.97886
A4	38	JAG1	3.24358	2.20326
A4	39	JAG1	3.44071	2.4004
A4	40	JAG1	3.62058	2.58027
A5	1	JAG1	1.07884	0
A5	2	JAG1	1.08104	0.00219655
A5	3	JAG1	1.08957	0.010729
A5	4	JAG1	1.09187	0.0130291
A5	5	JAG1	1.09645	0.0176075
A5	6	JAG1	1.10003	0.021188
A5	7	JAG1	1.1011	0.0222609
A5	8	JAG1	1.10382	0.0249817
A5	9	JAG1	1.09972	0.0208774
A5	10	JAG1	1.10382	0.0249803
A5	11	JAG1	1.10295	0.0241141
A5	12	JAG1	1.10907	0.0302354
A5	13	JAG1	1.1001	0.0212661
A5	14	JAG1	1.10703	0.0281929
A5	15	JAG1	1.10651	0.0276672
A5	16	JAG1	1.11002	0.0311823
A5	17	JAG1	1.11027	0.0314275
A5	18	JAG1	1.11328	0.034438
A5	19	JAG1	1.10961	0.030768
A5	20	JAG1	1.1156	0.0367573
A5	21	JAG1	1.11739	0.0385554
A5	22	JAG1	1.12295	0.0441077
A5	23	JAG1	1.12239	0.0435532
A5	24	JAG1	1.12694	0.0481048
A5	25	JAG1	1.13805	0.0592088
A5	26	JAG1	1.15303	0.0741886
A5	27	JAG1	1.18463	0.105795
A5	28	JAG1	1.24562	0.166777
A5	29	JAG1	1.33678	0.257943
A5	30	JAG1	1.48994	0.411101
A5	31	JAG1	1.69135	0.612506
A5	32	JAG1	1.92516	0.846324
A5	33	JAG1	2.18674	1.1079
A5	34	JAG1	2.45327	1.37443
A5	35	JAG1	2.70902	1.63018
A5	36	JAG1	2.95562	1.87678
A5	37	JAG1	3.17932	2.10049
A5	38	JAG1	3.39715	2.31831
A5	39	JAG1	3.58589	2.50705
A5	40	JAG1	3.75716	2.67832
A6	1	JAG1	1.01098	0
A6	2	JAG1	1.01473	0.00375497
A6	3	JAG1	1.02258	0.0116045
A6	4	JAG1	1.02854	0.0175624
A6	5	JAG1	1.02605	0.0150739
A6	6	JAG1	1.03187	0.020892
A6	7	JAG1	1.02967	0.018693
A6	8	JAG1	1.03372	0.0227437
A6	9	JAG1	1.03183	0.0208516
A6	10	JAG1	1.03212	0.0211377
A6	11	JAG1	1.03751	0.0265299
A6	12	JAG1	1.03512	0.0241452
A6	13	JAG1	1.03395	0.0229722
A6	14	JAG1	1.03867	0.0276871
A6	15	JAG1	1.0388	0.027826
A6	16	JAG1	1.03829	0.0273067
A6	17	JAG1	1.03538	0.0244014
A6	18	JAG1	1.03735	0.0263671
A6	19	JAG1	1.04186	0.0308765
A6	20	JAG1	1.0423	0.0313207
A6	21	JAG1	1.04104	0.0300589
A6	22	JAG1	1.03993	0.0289525
A6	23	JAG1	1.04907	0.0380954
A6	24	JAG1	1.04895	0.0379759
A6	25	JAG1	1.0587	0.0477246
A6	26	JAG1	1.07778	0.0667965
A6	27	JAG1	1.10671	0.0957268
A6	28	JAG1	1.16144	0.150465
A6	29	JAG1	1.25813	0.247155
A6	30	JAG1	1.39644	0.385463
A6	31	JAG1	1.58597	0.574992
A6	32	JAG1	1.82262	0.81164
A6	33	JAG1	2.06911	1.05814
A6	34	JAG1	2.31574	1.30476
A6	35	JAG1	2.56206	1.55108
A6	36	JAG1	2.77966	1.76868
A6	37	JAG1	3.00412	1.99314
A6	38	JAG1	3.19503	2.18405
A6	39	JAG1	3.36085	2.34987
A6	40	JAG1	3.53115	2.52017
A7	1	JAG1	1.0713	0
A7	2	JAG1	1.07793	0.0066272
A7	3	JAG1	1.0862	0.0148993
A7	4	JAG1	1.08908	0.0177749
A7	5	JAG1	1.09332	0.0220132
A7	6	JAG1	1.09591	0.02461
A7	7	JAG1	1.09597	0.0246636
A7	8	JAG1	1.09673	0.0254234
A7	9	JAG1	1.0978	0.0265002
A7	10	JAG1	1.09828	0.0269786
A7	11	JAG1	1.09875	0.0274463
A7	12	JAG1	1.09748	0.0261803
A7	13	JAG1	1.0947	0.0233954
A7	14	JAG1	1.09962	0.0283214
A7	15	JAG1	1.09897	0.027668
A7	16	JAG1	1.10093	0.0296278
A7	17	JAG1	1.10101	0.0297065
A7	18	JAG1	1.10619	0.0348856
A7	19	JAG1	1.10495	0.0336465
A7	20	JAG1	1.10813	0.0368277
A7	21	JAG1	1.1041	0.0327969
A7	22	JAG1	1.10714	0.0358374
A7	23	JAG1	1.10864	0.0373411
A7	24	JAG1	1.11176	0.0404594
A7	25	JAG1	1.11778	0.0464767
A7	26	JAG1	1.12244	0.0511397
A7	27	JAG1	1.13656	0.0652534
A7	28	JAG1	1.15887	0.0875692
A7	29	JAG1	1.20653	0.13523
A7	30	JAG1	1.28781	0.216512
A7	31	JAG1	1.40971	0.338403
A7	32	JAG1	1.58504	0.513739
A7	33	JAG1	1.79758	0.726278
A7	34	JAG1	2.04792	0.976617
A7	35	JAG1	2.30516	1.23386
A7	36	JAG1	2.5491	1.4778
A7	37	JAG1	2.79343	1.72213
A7	38	JAG1	3.02349	1.95219
A7	39	JAG1	3.23576	2.16445
A7	40	JAG1	3.43285	2.36155
A8	1	JAG1	1.08146	0
A8	2	JAG1	1.08988	0.00842071
A8	3	JAG1	1.09065	0.00918996
A8	4	JAG1	1.09662	0.0151649
A8	5	JAG1	1.0984	0.016938
A8	6	JAG1	1.1	0.0185462
A8	7	JAG1	1.09656	0.0151008
A8	8	JAG1	1.09773	0.0162706
A8	9	JAG1	1.09869	0.0172302
A8	10	JAG1	1.10246	0.0209985
A8	11	JAG1	1.10433	0.022874
A8	12	JAG1	1.10299	0.0215344
A8	13	JAG1	1.10598	0.0245234
A8	14	JAG1	1.10826	0.0268031
A8	15	JAG1	1.1057	0.0242465
A8	16	JAG1	1.10966	0.0282029
A8	17	JAG1	1.10867	0.0272149
A8	18	JAG1	1.11264	0.031181
A8	19	JAG1	1.11004	0.0285777
A8	20	JAG1	1.11105	0.0295881
A8	21	JAG1	1.11355	0.0320956
A8	22	JAG1	1.11414	0.0326867
A8	23	JAG1	1.1169	0.0354422
A8	24	JAG1	1.11653	0.0350766
A8	25	JAG1	1.12367	0.0422088
A8	26	JAG1	1.1363	0.054847
A8	27	JAG1	1.14805	0.0665944
A8	28	JAG1	1.18333	0.101876
A8	29	JAG1	1.23897	0.157508
A8	30	JAG1	1.33507	0.253609
A8	31	JAG1	1.47986	0.398401
A8	32	JAG1	1.67713	0.595668
A8	33	JAG1	1.91326	0.831799
A8	34	JAG1	2.16807	1.08661
A8	35	JAG1	2.42983	1.34837
A8	36	JAG1	2.69312	1.61166
A8	37	JAG1	2.94909	1.86763
A8	38	JAG1	3.18504	2.10359
A8	39	JAG1	3.40668	2.32522
A8	40	JAG1	3.6105	2.52905
A9	1	JAG1	1.10366	0
A9	2	JAG1	1.10427	0.000608921
A9	3	JAG1	1.11133	0.00767314
A9	4	JAG1	1.11662	0.0129602
A9	5	JAG1	1.11782	0.014161
A9	6	JAG1	1.11911	0.0154481
A9	7	JAG1	1.11959	0.0159342
A9	8	JAG1	1.12154	0.0178773
A9	9	JAG1	1.12103	0.0173727
A9	10	JAG1	1.12276	0.0190977
A9	11	JAG1	1.12603	0.0223716
A9	12	JAG1	1.11929	0.0156302
A9	13	JAG1	1.12564	0.0219767
A9	14	JAG1	1.12481	0.0211496
A9	15	JAG1	1.12687	0.0232059
A9	16	JAG1	1.12642	0.0227636
A9	17	JAG1	1.12844	0.0247769
A9	18	JAG1	1.13228	0.028615
A9	19	JAG1	1.12919	0.0255277
A9	20	JAG1	1.13629	0.0326338
A9	21	JAG1	1.13188	0.0282248
A9	22	JAG1	1.13754	0.0338802
A9	23	JAG1	1.13921	0.0355457
A9	24	JAG1	1.13985	0.0361936
A9	25	JAG1	1.14656	0.0429037
A9	26	JAG1	1.15353	0.049873
A9	27	JAG1	1.16981	0.066148
A9	28	JAG1	1.20124	0.097578
A9	29	JAG1	1.25423	0.15057
A9	30	JAG1	1.34389	0.240232
A9	31	JAG1	1.47955	0.375894
A9	32	JAG1	1.66152	0.557864
A9	33	JAG1	1.88895	0.785288
A9	34	JAG1	2.13696	1.0333
A9	35	JAG1	2.39475	1.29109
A9	36	JAG1	2.64592	1.54226
A9	37	JAG1	2.88401	1.78035
A9	38	JAG1	3.11452	2.01086
A9	39	JAG1	3.34578	2.24212
A9	40	JAG1	3.53361	2.42995
A10	1	JAG1	1.06447	0
A10	2	JAG1	1.07455	0.0100833
A10	3	JAG1	1.07895	0.0144857
A10	4	JAG1	1.08438	0.0199174
A10	5	JAG1	1.09235	0.0278838
A10	6	JAG1	1.09201	0.0275407
A10	7	JAG1	1.09257	0.0281019
A10	8	JAG1	1.08344	0.018975
A10	9	JAG1	1.09397	0.0295085
A10	10	JAG1	1.09207	0.0276092
A10	11	JAG1	1.09598	0.0315139
A10	12	JAG1	1.09403	0.0295693
A10	13	JAG1	1.09412	0.0296509
A10	14	JAG1	1.09626	0.0317909
A10	15	JAG1	1.09876	0.0342917
A10	16	JAG1	1.09996	0.0354992
A10	17	JAG1	1.10422	0.039753
A10	18	JAG1	1.10046	0.0359957
A10	19	JAG1	1.10088	0.0364152
A10	20	JAG1	1.10135	0.0368817
A10	21	JAG1	1.10086	0.0363991
A10	22	JAG1	1.10212	0.0376562
A10	23	JAG1	1.10513	0.0406622
A10	24	JAG1	1.10596	0.0414969
A10	25	JAG1	1.11012	0.0456564
A10	26	JAG1	1.11599	0.0515224
A10	27	JAG1	1.13226	0.0677974
A10	28	JAG1	1.15902	0.0945578
A10	29	JAG1	1.21022	0.145752
A10	30	JAG1	1.28638	0.221911
A10	31	JAG1	1.42839	0.363924
A10	32	JAG1	1.60839	0.543926
A10	33	JAG1	1.82864	0.764173
A10	34	JAG1	2.06601	1.00155
A10	35	JAG1	2.31402	1.24955
A10	36	JAG1	2.5602	1.49573
A10	37	JAG1	2.80144	1.73697
A10	38	JAG1	3.02034	1.95588
A10	39	JAG1	3.21641	2.15195
A10	40	JAG1	3.41145	2.34699
A11	1	JAG1	1.09347	0
A11	2	JAG1	1.10763	0.0141537
A11	3	JAG1	1.11481	0.021342
A11	4	JAG1	1.12004	0.0265682
A11	5	JAG1	1.12271	0.0292425
A11	6	JAG1	1.12427	0.0307995
A11	7	JAG1	1.12855	0.0350801
A11	8	JAG1	1.12358	0.0301105
A11	9	JAG1	1.12306	0.0295869
A11	10	JAG1	1.12307	0.0295999
A11	11	JAG1	1.12384	0.0303642
A11	12	JAG1	1.12362	0.0301474
A11	13	JAG1	1.12544	0.0319697
A11	14	JAG1	1.12695	0.0334811
A11	15	JAG1	1.12735	0.0338751
A11	16	JAG1	1.12693	0.0334613
A11	17	JAG1	1.13317	0.0396997
A11	18	JAG1	1.13128	0.0378088
A11	19	JAG1	1.13482	0.0413465
A11	20	JAG1	1.13215	0.0386786
A11	21	JAG1	1.12883	0.0353613
A11	22	JAG1	1.13294	0.0394681
A11	23	JAG1	1.13576	0.0422865
A11	24	JAG1	1.13974	0.0462677
A11	25	JAG1	1.14184	0.0483671
A11	26	JAG1	1.1515	0.0580258
A11	27	JAG1	1.16763	0.0741614
A11	28	JAG1	1.19754	0.104071
A11	29	JAG1	1.25348	0.160007
A11	30	JAG1	1.3425	0.249025
A11	31	JAG1	1.47811	0.384642
A11	32	JAG1	1.66536	0.571887
A11	33	JAG1	1.89249	0.799016
A11	34	JAG1	2.15742	1.06395
A11	35	JAG1	2.41143	1.31796
A11	36	JAG1	2.66767	1.5742
A11	37	JAG1	2.89916	1.80568
A11	38	JAG1	3.13815	2.04468
A11	39	JAG1	3.36471	2.27124
A11	40	JAG1	3.55439	2.46091
A12	1	JAG1	1.01343	0
A12	2	JAG1	1.01672	0.00328743
A12	3	JAG1	1.02017	0.00673831
A12	4	JAG1	1.02354	0.0101091
A12	5	JAG1	1.0249	0.0114681
A12	6	JAG1	1.02596	0.0125318
A12	7	JAG1	1.02968	0.0162477
A12	8	JAG1	1.03422	0.0207931
A12	9	JAG1	1.02969	0.0162623
A12	10	JAG1	1.03099	0.01756
A12	11	JAG1	1.03278	0.0193541
A12	12	JAG1	1.03221	0.0187773
A12	13	JAG1	1.03221	0.0187776
A12	14	JAG1	1.03226	0.0188311
A12	15	JAG1	1.03198	0.018549
A12	16	JAG1	1.03999	0.0265548
A12	17	JAG1	1.03016	0.0167285
A12	18	JAG1	1.03365	0.0202239
A12	19	JAG1	1.03432	0.0208938
A12	20	JAG1	1.03606	0.0226307
A12	21	JAG1	1.03586	0.0224322
A12	22	JAG1	1.03582	0.0223851
A12	23	JAG1	1.03671	0.023279
A12	24	JAG1	1.03682	0.0233893
A12	25	JAG1	1.04025	0.0268166
A12	26	JAG1	1.04852	0.0350915
A12	27	JAG1	1.06043	0.0469946
A12	28	JAG1	1.08197	0.0685437
A12	29	JAG1	1.11614	0.102708
A12	30	JAG1	1.19031	0.176879
A12	31	JAG1	1.29931	0.285884
A12	32	JAG1	1.46267	0.449239
A12	33	JAG1	1.66953	0.656099
A12	34	JAG1	1.90677	0.893344
A12	35	JAG1	2.14744	1.13401
A12	36	JAG1	2.38732	1.37389
A12	37	JAG1	2.61839	1.60496
A12	38	JAG1	2.8432	1.82977
A12	39	JAG1	3.0599	2.04647
A12	40	JAG1	3.24609	2.23266
B1	1	JAG1	1.01298	0
B1	2	JAG1	1.01614	0.00316179
B1	3	JAG1	1.02044	0.00746739
B1	4	JAG1	1.02814	0.0151644
B1	5	JAG1	1.02862	0.0156455
B1	6	JAG1	1.02971	0.016735
B1	7	JAG1	1.02987	0.0168904
B1	8	JAG1	1.0353	0.0223188
B1	9	JAG1	1.03297	0.0199916
B1	10	JAG1	1.03343	0.0204551
B1	11	JAG1	1.03471	0.0217309
B1	12	JAG1	1.03511	0.0221294
B1	13	JAG1	1.03591	0.0229323
B1	14	JAG1	1.03884	0.0258595
B1	15	JAG1	1.03867	0.025689
B1	16	JAG1	1.03455	0.0215704
B1	17	JAG1	1.03572	0.0227377
B1	18	JAG1	1.04147	0.0284898
B1	19	JAG1	1.03744	0.0244612
B1	20	JAG1	1.04092	0.027944
B1	21	JAG1	1.03942	0.0264407
B1	22	JAG1	1.0429	0.029919
B1	23	JAG1	1.04762	0.0346437
B1	24	JAG1	1.05142	0.038443
B1	25	JAG1	1.05479	0.0418124
B1	26	JAG1	1.07204	0.0590652
B1	27	JAG1	1.09838	0.0854019
B1	28	JAG1	1.15713	0.144153
B1	29	JAG1	1.23842	0.225442
B1	30	JAG1	1.37608	0.363106
B1	31	JAG1	1.57021	0.557231
B1	32	JAG1	1.78292	0.769946
B1	33	JAG1	2.03466	1.02168
B1	34	JAG1	2.28637	1.27339
B1	35	JAG1	2.52993	1.51695
B1	36	JAG1	2.75942	1.74644
B1	37	JAG1	2.98469	1.97171
B1	38	JAG1	3.18962	2.17664
B1	39	JAG1	3.37303	2.36006
B1	40	JAG1	3.57048	2.5575
B2	1	JAG1	1.11391	0
B2	2	JAG1	1.10051	-0.0133952
B2	3	JAG1	1.09995	-0.0139571
B2	4	JAG1	1.10579	-0.00811744
B2	5	JAG1	1.10851	-0.0054003
B2	6	JAG1	1.11071	-0.00319374
B2	7	JAG1	1.11056	-0.00334501
B2	8	JAG1	1.11473	0.000827074
B2	9	JAG1	1.11061	-0.00329578
B2	10	JAG1	1.11669	0.00278366
B2	11	JAG1	1.11704	0.00313056
B2	12	JAG1	1.11692	0.00301027
B2	13	JAG1	1.12065	0.00674438
B2	14	JAG1	1.12301	0.00910568
B2	15	JAG1	1.12335	0.0094378
B2	16	JAG1	1.12558	0.0116754
B2	17	JAG1	1.12182	0.00790811
B2	18	JAG1	1.13294	0.0190312
B2	19	JAG1	1.13884	0.0249286
B2	20	JAG1	1.12869	0.0147851
B2	21	JAG1	1.12516	0.0112523
B2	22	JAG1	1.12851	0.0146003
B2	23	JAG1	1.1326	0.0186923
B2	24	JAG1	1.14304	0.0291326
B2	25	JAG1	1.15684	0.0429337
B2	26	JAG1	1.19776	0.083848
B2	27	JAG1	1.24865	0.134738
B2	28	JAG1	1.34857	0.234662
B2	29	JAG1	1.48139	0.367484
B2	30	JAG1	1.67584	0.561929
B2	31	JAG1	1.90419	0.790285
B2	32	JAG1	2.16255	1.04864
B2	33	JAG1	2.42687	1.31297
B2	34	JAG1	2.67229	1.55838
B2	35	JAG1	2.91983	1.80592
B2	36	JAG1	3.14696	2.03306
B2	37	JAG1	3.35365	2.23975
B2	38	JAG1	3.55709	2.44318
B2	39	JAG1	3.70297	2.58907
B2	40	JAG1	3.87923	2.76532
B3	1	JAG1	1.07156	0
B3	2	JAG1	1.07417	0.00260866
B3	3	JAG1	1.07415	0.00258684
B3	4	JAG1	1.07658	0.00502658
B3	5	JAG1	1.07919	0.00763524
B3	6	JAG1	1.08093	0.00937438
B3	7	JAG1	1.07695	0.0053941
B3	8	JAG1	1.07953	0.0079689
B3	9	JAG1	1.08135	0.00979066
B3	10	JAG1	1.082	0.0104457
B3	11	JAG1	1.08018	0.00862288
B3	12	JAG1	1.08359	0.0120361
B3	13	JAG1	1.08329	0.0117339
B3	14	JAG1	1.08526	0.0137054
B3	15	JAG1	1.0849	0.0133429
B3	16	JAG1	1.08584	0.0142767
B3	17	JAG1	1.08145	0.00989306
B3	18	JAG1	1.08725	0.0156924
B3	19	JAG1	1.08855	0.0169926
B3	20	JAG1	1.0868	0.0152425
B3	21	JAG1	1.08935	0.017789
B3	22	JAG1	1.0985	0.0269442
B3	23	JAG1	1.09953	0.0279735
B3	24	JAG1	1.10742	0.0358624
B3	25	JAG1	1.12087	0.049309
B3	26	JAG1	1.15967	0.0881114
B3	27	JAG1	1.21437	0.142816
B3	28	JAG1	1.31596	0.244403
B3	29	JAG1	1.45888	0.387326
B3	30	JAG1	1.65361	0.582055
B3	31	JAG1	1.87279	0.801232
B3	32	JAG1	2.13264	1.06108
B3	33	JAG1	2.36606	1.2945
B3	34	JAG1	2.61663	1.54507
B3	35	JAG1	2.84564	1.77408
B3	36	JAG1	3.04908	1.97752
B3	37	JAG1	3.25099	2.17943
B3	38	JAG1	3.43615	2.36459
B3	39	JAG1	3.6034	2.53184
B3	40	JAG1	3.74112	2.66956
B4	1	JAG1	1.07089	0
B4	2	JAG1	1.06722	-0.0036658
B4	3	JAG1	1.0691	-0.00178587
B4	4	JAG1	1.07602	0.00512946
B4	5	JAG1	1.07506	0.00417006
B4	6	JAG1	1.08016	0.00927758
B4	7	JAG1	1.08035	0.00946152
B4	8	JAG1	1.08714	0.0162524
B4	9	JAG1	1.08278	0.0118902
B4	10	JAG1	1.08909	0.0182084
B4	11	JAG1	1.08322	0.0123291
B4	12	JAG1	1.08655	0.0156597
B4	13	JAG1	1.08823	0.0173464
B4	14	JAG1	1.08536	0.0144739
B4	15	JAG1	1.08673	0.0158391
B4	16	JAG1	1.08757	0.0166879
B4	17	JAG1	1.08862	0.0177302
B4	18	JAG1	1.09239	0.0215027
B4	19	JAG1	1.09277	0.0218835
B4	20	JAG1	1.09377	0.0228864
B4	21	JAG1	1.09385	0.0229667
B4	22	JAG1	1.10061	0.0297239
B4	23	JAG1	1.10479	0.033901
B4	24	JAG1	1.11832	0.0474368
B4	25	JAG1	1.14705	0.0761648
B4	26	JAG1	1.18542	0.114533
B4	27	JAG1	1.25606	0.185172
B4	28	JAG1	1.36919	0.298303
B4	29	JAG1	1.53304	0.462155
B4	30	JAG1	1.73607	0.665183
B4	31	JAG1	1.96796	0.897073
B4	32	JAG1	2.21042	1.13953
B4	33	JAG1	2.45947	1.38858
B4	34	JAG1	2.70831	1.63742
B4	35	JAG1	2.91039	1.83951
B4	36	JAG1	3.11932	2.04843
B4	37	JAG1	3.30988	2.239
B4	38	JAG1	3.5012	2.43031
B4	39	JAG1	3.67037	2.59949
B4	40	JAG1	3.80001	2.72913
B5	1	JAG1	1.09625	0
B5	2	JAG1	1.09518	-0.00107121
B5	3	JAG1	1.10574	0.00948358
B5	4	JAG1	1.1045	0.00824547
B5	5	JAG1	1.10265	0.00639975
B5	6	JAG1	1.10979	0.013539
B5	7	JAG1	1.1054	0.00914359
B5	8	JAG1	1.11034	0.0140867
B5	9	JAG1	1.1079	0.0116518
B5	10	JAG1	1.10149	0.00523627
B5	11	JAG1	1.11067	0.0144211
B5	12	JAG1	1.11643	0.0201787
B5	13	JAG1	1.11047	0.0142163
B5	14	JAG1	1.11288	0.0166246
B5	15	JAG1	1.11427	0.0180206
B5	16	JAG1	1.1156	0.0193443
B5	17	JAG1	1.11796	0.0217054
B5	18	JAG1	1.11743	0.0211792
B5	19	JAG1	1.12363	0.0273827
B5	20	JAG1	1.12241	0.026158
B5	21	JAG1	1.11896	0.0227044
B5	22	JAG1	1.12457	0.0283148
B5	23	JAG1	1.13763	0.0413793
B5	24	JAG1	1.14588	0.049632
B5	25	JAG1	1.16982	0.0735681
B5	26	JAG1	1.21079	0.114534
B5	27	JAG1	1.28432	0.188071
B5	28	JAG1	1.40604	0.309792
B5	29	JAG1	1.57473	0.478476
B5	30	JAG1	1.79464	0.698392
B5	31	JAG1	2.05094	0.954688
B5	32	JAG1	2.31956	1.22331
B5	33	JAG1	2.5863	1.49005
B5	34	JAG1	2.85409	1.75784
B5	35	JAG1	3.09521	1.99896
B5	36	JAG1	3.3071	2.21085
B5	37	JAG1	3.53781	2.44155
B5	38	JAG1	3.72184	2.62558
B5	39	JAG1	3.84533	2.74908
B5	40	JAG1	4.02378	2.92752
B6	1	JAG1	1.09489	0
B6	2	JAG1	1.09017	-0.004722
B6	3	JAG1	1.09476	-0.000131726
B6	4	JAG1	1.0947	-0.000188589
B6	5	JAG1	1.1009	0.00600982
B6	6	JAG1	1.10314	0.00824523
B6	7	JAG1	1.10466	0.00977242
B6	8	JAG1	1.10084	0.00594866
B6	9	JAG1	1.10503	0.0101403
B6	10	JAG1	1.10505	0.0101625
B6	11	JAG1	1.10421	0.00932097
B6	12	JAG1	1.10655	0.0116584
B6	13	JAG1	1.10645	0.011561
B6	14	JAG1	1.11086	0.0159718
B6	15	JAG1	1.11019	0.0153009
B6	16	JAG1	1.10686	0.0119665
B6	17	JAG1	1.11242	0.0175315
B6	18	JAG1	1.11151	0.0166215
B6	19	JAG1	1.1145	0.0196126
B6	20	JAG1	1.11402	0.0191292
B6	21	JAG1	1.11721	0.0223216
B6	22	JAG1	1.12136	0.0264679
B6	23	JAG1	1.1288	0.0339088
B6	24	JAG1	1.13975	0.0448644
B6	25	JAG1	1.1613	0.0664079
B6	26	JAG1	1.20401	0.109121
B6	27	JAG1	1.269	0.174107
B6	28	JAG1	1.38164	0.286752
B6	29	JAG1	1.54273	0.447842
B6	30	JAG1	1.75681	0.661922
B6	31	JAG1	1.99908	0.904186
B6	32	JAG1	2.2485	1.15361
B6	33	JAG1	2.50699	1.4121
B6	34	JAG1	2.75812	1.66323
B6	35	JAG1	2.99374	1.89885
B6	36	JAG1	3.21801	2.12312
B6	37	JAG1	3.4284	2.33351
B6	38	JAG1	3.60381	2.50892
B6	39	JAG1	3.77517	2.68028
B6	40	JAG1	3.93094	2.83605
B7	1	JAG1	1.09268	0
B7	2	JAG1	1.09032	-0.00235975
B7	3	JAG1	1.09313	0.000453115
B7	4	JAG1	1.09196	-0.000717521
B7	5	JAG1	1.10007	0.00739229
B7	6	JAG1	1.09875	0.00606847
B7	7	JAG1	1.09569	0.00301003
B7	8	JAG1	1.10368	0.0110072
B7	9	JAG1	1.10343	0.0107541
B7	10	JAG1	1.1124	0.019726
B7	11	JAG1	1.10491	0.0122328
B7	12	JAG1	1.11079	0.0181109
B7	13	JAG1	1.11275	0.0200729
B7	14	JAG1	1.10895	0.0162709
B7	15	JAG1	1.11379	0.0211153
B7	16	JAG1	1.11022	0.0175453
B7	17	JAG1	1.11452	0.0218396
B7	18	JAG1	1.11631	0.0236359
B7	19	JAG1	1.11556	0.0228819
B7	20	JAG1	1.11524	0.0225679
B7	21	JAG1	1.11907	0.0263923
B7	22	JAG1	1.12027	0.027596
B7	23	JAG1	1.1201	0.027426
B7	24	JAG1	1.12698	0.0343055
B7	25	JAG1	1.12652	0.0338464
B7	26	JAG1	1.14603	0.053352
B7	27	JAG1	1.17327	0.0805906
B7	28	JAG1	1.21396	0.121279
B7	29	JAG1	1.29195	0.199269
B7	30	JAG1	1.41027	0.317593
B7	31	JAG1	1.58677	0.494095
B7	32	JAG1	1.80329	0.710608
B7	33	JAG1	2.05238	0.959707
B7	34	JAG1	2.32959	1.23692
B7	35	JAG1	2.58559	1.49291
B7	36	JAG1	2.84779	1.75511
B7	37	JAG1	3.10258	2.0099
B7	38	JAG1	3.30841	2.21573
B7	39	JAG1	3.51319	2.42051
B7	40	JAG1	3.68456	2.59189
B8	1	JAG1	1.11192	0
B8	2	JAG1	1.10716	-0.0047636
B8	3	JAG1	1.10934	-0.0025779
B8	4	JAG1	1.11447	0.00254548
B8	5	JAG1	1.11744	0.00551605
B8	6	JAG1	1.11896	0.00703847
B8	7	JAG1	1.12236	0.010435
B8	8	JAG1	1.12179	0.00986516
B8	9	JAG1	1.12675	0.0148313
B8	10	JAG1	1.12354	0.0116136
B8	11	JAG1	1.12993	0.0180087
B8	12	JAG1	1.12396	0.0120366
B8	13	JAG1	1.12616	0.0142399
B8	14	JAG1	1.12687	0.0149496
B8	15	JAG1	1.13025	0.0183284
B8	16	JAG1	1.13187	0.0199437
B8	17	JAG1	1.13458	0.0226585
B8	18	JAG1	1.135	0.0230762
B8	19	JAG1	1.13616	0.0242405
B8	20	JAG1	1.1328	0.0208747
B8	21	JAG1	1.13767	0.0257523
B8	22	JAG1	1.1399	0.0279815
B8	23	JAG1	1.14162	0.0297
B8	24	JAG1	1.14193	0.030005
B8	25	JAG1	1.14614	0.0342227
B8	26	JAG1	1.15319	0.0412658
B8	27	JAG1	1.16495	0.0530275
B8	28	JAG1	1.18573	0.0738105
B8	29	JAG1	1.22827	0.116346
B8	30	JAG1	1.30282	0.190902
B8	31	JAG1	1.4148	0.302874
B8	32	JAG1	1.58017	0.468244
B8	33	JAG1	1.79665	0.684724
B8	34	JAG1	2.04473	0.932806
B8	35	JAG1	2.29996	1.18804
B8	36	JAG1	2.55997	1.44804
B8	37	JAG1	2.81233	1.70041
B8	38	JAG1	3.05426	1.94234
B8	39	JAG1	3.28095	2.16903
B8	40	JAG1	3.48497	2.37305
B9	1	JAG1	1.11209	0
B9	2	JAG1	1.11195	-0.000141859
B9	3	JAG1	1.11318	0.00108731
B9	4	JAG1	1.11098	-0.00111032
B9	5	JAG1	1.11687	0.00477731
B9	6	JAG1	1.12636	0.0142674
B9	7	JAG1	1.12297	0.0108782
B9	8	JAG1	1.12026	0.00816405
B9	9	JAG1	1.1243	0.0122107
B9	10	JAG1	1.12007	0.00797451
B9	11	JAG1	1.12598	0.0138841
B9	12	JAG1	1.13052	0.0184314
B9	13	JAG1	1.12427	0.0121831
B9	14	JAG1	1.13104	0.018947
B9	15	JAG1	1.13357	0.0214757
B9	16	JAG1	1.13338	0.0212849
B9	17	JAG1	1.14162	0.0295255
B9	18	JAG1	1.12865	0.0165626
B9	19	JAG1	1.1406	0.0285041
B9	20	JAG1	1.13543	0.0233403
B9	21	JAG1	1.14017	0.0280787
B9	22	JAG1	1.14132	0.0292245
B9	23	JAG1	1.1389	0.0268104
B9	24	JAG1	1.14344	0.0313483
B9	25	JAG1	1.15455	0.0424588
B9	26	JAG1	1.16353	0.0514362
B9	27	JAG1	1.17283	0.0607401
B9	28	JAG1	1.20958	0.0974877
B9	29	JAG1	1.2733	0.161207
B9	30	JAG1	1.37347	0.261374
B9	31	JAG1	1.53408	0.42199
B9	32	JAG1	1.7466	0.634509
B9	33	JAG1	1.99424	0.882148
B9	34	JAG1	2.23817	1.12608
B9	35	JAG1	2.50285	1.39076
B9	36	JAG1	2.76942	1.65733
B9	37	JAG1	3.00373	1.89163
B9	38	JAG1	3.23392	2.12183
B9	39	JAG1	3.43684	2.32475
B9	40	JAG1	3.64446	2.53237
B10	1	JAG1	1.12527	0
B10	2	JAG1	1.11767	-0.00760567
B10	3	JAG1	1.12042	-0.00485051
B10	4	JAG1	1.12398	-0.00129175
B10	5	JAG1	1.12411	-0.00115609
B10	6	JAG1	1.12347	-0.00180233
B10	7	JAG1	1.12705	0.00177407
B10	8	JAG1	1.13067	0.00539958
B10	9	JAG1	1.13092	0.00564456
B10	10	JAG1	1.13062	0.00534451
B10	11	JAG1	1.12834	0.00306511
B10	12	JAG1	1.12874	0.00346971
B10	13	JAG1	1.13492	0.00965095
B10	14	JAG1	1.13452	0.00925326
B10	15	JAG1	1.13416	0.00888598
B10	16	JAG1	1.13616	0.0108892
B10	17	JAG1	1.13562	0.0103493
B10	18	JAG1	1.13232	0.00705063
B10	19	JAG1	1.13426	0.00899065
B10	20	JAG1	1.13796	0.0126885
B10	21	JAG1	1.1385	0.0132304
B10	22	JAG1	1.13723	0.011955
B10	23	JAG1	1.14186	0.0165882
B10	24	JAG1	1.14097	0.0157021
B10	25	JAG1	1.14562	0.0203497
B10	26	JAG1	1.15535	0.0300825
B10	27	JAG1	1.16356	0.0382935
B10	28	JAG1	1.17834	0.0530707
B10	29	JAG1	1.21751	0.0922371
B10	30	JAG1	1.2773	0.152028
B10	31	JAG1	1.37348	0.24821
B10	32	JAG1	1.5258	0.400534
B10	33	JAG1	1.72035	0.595074
B10	34	JAG1	1.9542	0.828928
B10	35	JAG1	2.20748	1.08221
B10	36	JAG1	2.46073	1.33546
B10	37	JAG1	2.72313	1.59786
B10	38	JAG1	2.97055	1.84528
B10	39	JAG1	3.20064	2.07537
B10	40	JAG1	3.4265	2.30122
B11	1	JAG1	1.09888	0
B11	2	JAG1	1.09888	2.02656e-06
B11	3	JAG1	1.1029	0.00402224
B11	4	JAG1	1.1059	0.00702107
B11	5	JAG1	1.10217	0.00329089
B11	6	JAG1	1.10623	0.0073514
B11	7	JAG1	1.10789	0.00900757
B11	8	JAG1	1.10854	0.00966358
B11	9	JAG1	1.11385	0.0149688
B11	10	JAG1	1.11402	0.0151424
B11	11	JAG1	1.11406	0.0151762
B11	12	JAG1	1.11043	0.0115516
B11	13	JAG1	1.11294	0.0140563
B11	14	JAG1	1.11294	0.0140598
B11	15	JAG1	1.11471	0.0158241
B11	16	JAG1	1.11647	0.0175874
B11	17	JAG1	1.11038	0.0114955
B11	18	JAG1	1.11875	0.0198711
B11	19	JAG1	1.1128	0.0139174
B11	20	JAG1	1.12021	0.0213263
B11	21	JAG1	1.12089	0.0220063
B11	22	JAG1	1.12101	0.0221297
B11	23	JAG1	1.11984	0.0209621
B11	24	JAG1	1.12132	0.0224383
B11	25	JAG1	1.12213	0.0232462
B11	26	JAG1	1.12339	0.0245123
B11	27	JAG1	1.13415	0.0352719
B11	28	JAG1	1.14923	0.0503484
B11	29	JAG1	1.16964	0.0707597
B11	30	JAG1	1.21178	0.112897
B11	31	JAG1	1.29219	0.193312
B11	32	JAG1	1.41968	0.320801
B11	33	JAG1	1.60205	0.503168
B11	34	JAG1	1.81558	0.716698
B11	35	JAG1	2.0713	0.972423
B11	36	JAG1	2.31979	1.22091
B11	37	JAG1	2.58165	1.48277
B11	38	JAG1	2.82642	1.72754
B11	39	JAG1	3.06017	1.96129
B11	40	JAG1	3.2702	2.17132
B12	1	JAG1	1.1047	0
B12	2	JAG1	1.11286	0.00816011
B12	3	JAG1	1.12232	0.0176172
B12	4	JAG1	1.124	0.0192991
B12	5	JAG1	1.131	0.0262992
B12	6	JAG1	1.13178	0.0270824
B12	7	JAG1	1.13268	0.0279744
B12	8	JAG1	1.13327	0.0285698
B12	9	JAG1	1.13644	0.0317384
B12	10	JAG1	1.13427	0.0295674
B12	11	JAG1	1.13607	0.0313671
B12	12	JAG1	1.13555	0.0308489
B12	13	JAG1	1.13481	0.0301136
B12	14	JAG1	1.13424	0.0295424
B12	15	JAG1	1.13641	0.0317119
B12	16	JAG1	1.13472	0.0300223
B12	17	JAG1	1.13785	0.0331447
B12	18	JAG1	1.13584	0.0311352
B12	19	JAG1	1.13703	0.032331
B12	20	JAG1	1.13584	0.0311425
B12	21	JAG1	1.13587	0.0311717
B12	22	JAG1	1.14004	0.0353369
B12	23	JAG1	1.13818	0.0334805
B12	24	JAG1	1.1432	0.0385026
B12	25	JAG1	1.14729	0.042588
B12	26	JAG1	1.1542	0.0495001
B12	27	JAG1	1.1655	0.060804
B12	28	JAG1	1.18878	0.0840789
B12	29	JAG1	1.23401	0.129309
B12	30	JAG1	1.3127	0.208003
B12	31	JAG1	1.43896	0.334259
B12	32	JAG1	1.61172	0.507014
B12	33	JAG1	1.8284	0.7237
B12	34	JAG1	2.07499	0.970291
B12	35	JAG1	2.32827	1.22357
B12	36	JAG1	2.58368	1.47898
B12	37	JAG1	2.83867	1.73397
B12	38	JAG1	3.07583	1.97113
B12	39	JAG1	3.29001	2.18531
B12	40	JAG1	3.49362	2.38892

## Sheet: BioGroup Analysis Result
Block Type	96well
Chemistry	TAQMAN
Experiment File Name	C:\Users\11193327\Dropbox\Sami\Sams Tech Paper 2015\Figures\Figure 3\Final\JAG1\SK_11112015_No3_Final Figure.eds
Experiment Run End Time	Not Started
Instrument Type	steponeplus
Passive Reference	ROX
Biogroup Name	Target Name	Task	RQ	RQ Min	RQ Max	Cт Mean	ΔCт Mean	ΔCт SE	ΔΔCт
Analysis Type	Singleplex
Endogenous Control	JAG1
RQ Min/Max Confidence Level	95.0
Reference Biogroup Name

## Sheet: Technical Analysis Result
Block Type	96well
Chemistry	TAQMAN
Experiment File Name	C:\Users\11193327\Dropbox\Sami\Sams Tech Paper 2015\Figures\Figure 3\Final\JAG1\SK_11112015_No3_Final Figure.eds
Experiment Run End Time	Not Started
Instrument Type	steponeplus
Passive Reference	ROX
Sample Name	Target Name	Task	RQ	RQ Min	RQ Max	Cт Mean	ΔCт Mean	ΔCт SE	ΔΔCт
120min mixed	JAG1	UNKNOWN				30.0238
120min random	JAG1	UNKNOWN				29.7187
	JAG1	NTC
Analysis Type	Singleplex
Endogenous Control	JAG1
RQ Min/Max Confidence Level	95.0
Reference Sample	120min mixed
