# Supplementary material for: qPCR multiplex detection of microRNA and messenger RNA in a single reaction
Source: PeerJ. 2020 Jun 25;8:e9004. doi: 10.7717/peerj.9004 (PMC7321665; doi:10.7717/peerj.9004)
Supplement: Supplemental Information 10 [file peerj-08-9004-s010.xls]

## Sheet: Amplification Data_compact
Analysis of Real Time PCR data	version:2016.0	WoL: amplicon group				Chemistry: hydrolysis probe	N0 = threshold /(Eff_mean^Cq)			LEGEND
analysis date:9/08/2016		points in WoL: 4				Input: ss-cDNA
Input Sheet: Amplification Data		Thresholds: group								Sample Use:
name	indiv_PCR_eff	Amplicon	Sample Name	threshold	mean_PCR_eff	Cq	N0	Sample_Use	Quality_checks	1: used for W-o-L setting
A1_Target_1	1.75046	Dicer -120 min random	Dicer -120 min random	0.153	1.94177	25.9507	5.07846e-09	1 0 3	- - - - - 5 6 - - 9 - - - -	2: contributes to mean PCR efficiency
A2_Target_1	1.94242	Dicer -120 min random	Dicer -120 min random	0.153	1.94177	26.6073	3.28487e-09	1 2 3	- - - - - - - - - 9 - - - -	3: N0 value calculated
A3_Target_1	1.94113	Dicer -120 min random	Dicer -120 min random	0.153	1.94177	27.0318	2.47843e-09	0 2 3	- - 2 - - - - - 8 9 - - - -	0: not used / calculated
A7_Target_3	1.70195	Ago -120 min random	Ago -120 min random	0.1305	1.67907	27.1944	9.88491e-08	1 2 3	0 - - - - - - - - - - - - -
A8_Target_3	1.6562	Ago -120 min random	Ago -120 min random	0.1305	1.67907	25.3337	2.59278e-07	1 2 3	0 - - - - - - - - - - - - -	Quality Checks:
A9_Target_3	1.60136	Ago -120 min random	Ago -120 min random	0.1305	1.67907	24.5182	3.9565e-07	0 0 3	- - 2 - - 5 6 - - 9 - - - -	0: passed all checks
E1_Target_1	1.93356	Dicer -120 min mixed	Dicer -120 min mixed	0.2485	1.93529	25.2815	1.39942e-08	1 2 3	0 - - - - - - - - - - - - -	1: no amplification
E2_Target_1	1.89539	Dicer -120 min mixed	Dicer -120 min mixed	0.2485	1.93529	25.2076	1.46936e-08	1 2 3	0 - - - - - - - - - - - - -	2: baseline error
E3_Target_1	1.97693	Dicer -120 min mixed	Dicer -120 min mixed	0.2485	1.93529	25.5997	1.13421e-08	1 2 3	- - - - - - - - - 9 - - - -	3: no plateau
E7_Target_3	1.86304	Ago -120 min mixed	Ago -120 min mixed	0.287	1.87818	25.7356	2.58884e-08	1 2 3	- - - - - - - - - 9 - - - -	4: noisy sample
E8_Target_3	1.72853	Ago -120 min mixed	Ago -120 min mixed	0.287	1.87818	26.2652	1.85403e-08	0 0 3	- - 2 - - 5 6 - - 9 - - - -	5: PCR efficiency outside 5%
E9_Target_3	1.89332	Ago -120 min mixed	Ago -120 min mixed	0.287	1.87818	26.3044	1.80882e-08	0 2 3	- - 2 - - - - - 8 9 - - - -	6: excluded from mean Eff
										7: excluded by user
										8: included by user
										9: manual baseline
	1.93529									if amplicon groups are defined the rules are applied per group
	1.878
										User Choices:
										Calculation of Mean Efficiency:
										exclude <no plateau> samples
										exclude <efficiency outlier> samples
										efficiency outlier defined as >5% from group median
										Baseline Estimation:
										log-linear phase criterion: strictly continuous Log-linear phase

## Sheet: Amplification Data_output
Analysis of Real Time PCR data	version:2016.0	WoL: amplicon group							Chemistry: hydrolysis probe					N0 = threshold /(Eff_mean^Cq)			LEGEND
analysis date:9/08/2016		points in WoL: 4							Input: ss-cDNA
Input Sheet: Amplification Data		Thresholds: group															Sample Use:
sample	name	lower_limit	upper_limit	n_included	N0_(indiv_eff)	indiv PCR eff	R2	threshold	Cq	Baseline	Amplicon	mean_PCR_eff	Sample Name	N0_(mean eff)	Sample_Use	Quality_checks	1: used for W-o-L setting
1	A1_Target_1	0.0882634	0.489849	4	7.49375e-08	1.75046	0.999545	0.153	25.9507	1.402	Dicer -120 min random	1.94177	Dicer -120 min random	5.07846e-09	1 0 3	- - - - - 5 6 - - 9 - - - -	2: contributes to mean PCR efficiency
2	A2_Target_1	0.0114551	0.306196	5	3.25598e-09	1.94242	0.998901	0.153	26.6073	1.45065	Dicer -120 min random	1.94177	Dicer -120 min random	3.28487e-09	1 2 3	- - - - - - - - - 9 - - - -	3: N0 value calculated
3	A3_Target_1	0.022856	0.306196	5	2.50078e-09	1.94113	0.977826	0.153	27.0318	1.76852	Dicer -120 min random	1.94177	Dicer -120 min random	2.47843e-09	0 2 3	- - 2 - - - - - 8 9 - - - -	0: not used / calculated
4	A7_Target_3	0.0328095	0.261216	4	6.84146e-08	1.70195	0.99767	0.1305	27.1944	1.54477	Ago -120 min random	1.67907	Ago -120 min random	9.88491e-08	1 2 3	0 - - - - - - - - - - - - -
5	A8_Target_3	0.0328095	0.261216	4	3.67026e-07	1.6562	0.994201	0.1305	25.3337	1.99138	Ago -120 min random	1.67907	Ago -120 min random	2.59278e-07	1 2 3	0 - - - - - - - - - - - - -	Quality Checks:
6	A9_Target_3	0.0519996	0.328852	4	1.26455e-06	1.60136	0.992326	0.1305	24.5182	2.205	Ago -120 min random	1.67907	Ago -120 min random	3.9565e-07	0 0 3	- - 2 - - 5 6 - - 9 - - - -	0: passed all checks
7	E1_Target_1	0.0328852	0.496592	4	1.43154e-08	1.93356	0.993988	0.2485	25.2815	1.72781	Dicer -120 min mixed	1.93529	Dicer -120 min mixed	1.39942e-08	1 2 3	0 - - - - - - - - - - - - -	1: no amplification
8	E2_Target_1	0.0521195	0.496592	4	2.48441e-08	1.89539	0.996482	0.2485	25.2076	2.44461	Dicer -120 min mixed	1.93529	Dicer -120 min mixed	1.46936e-08	1 2 3	0 - - - - - - - - - - - - -	2: baseline error
9	E3_Target_1	0.0328852	0.496592	4	6.57669e-09	1.97693	0.99777	0.2485	25.5997	2.38655	Dicer -120 min mixed	1.93529	Dicer -120 min mixed	1.13421e-08	1 2 3	- - - - - - - - - 9 - - - -	3: no plateau
10	E7_Target_3	0.049545	0.572796	4	3.1883e-08	1.86304	0.993318	0.287	25.7356	2.92115	Ago -120 min mixed	1.87818	Ago -120 min mixed	2.58884e-08	1 2 3	- - - - - - - - - 9 - - - -	4: noisy sample
11	E8_Target_3	0.0623735	0.454988	4	1.64161e-07	1.72853	0.987828	0.287	26.2652	2.56667	Ago -120 min mixed	1.87818	Ago -120 min mixed	1.85403e-08	0 0 3	- - 2 - - 5 6 - - 9 - - - -	5: PCR efficiency outside 5%
12	E9_Target_3	0.049545	0.572796	4	1.46448e-08	1.89332	0.999859	0.287	26.3044	2.76066	Ago -120 min mixed	1.87818	Ago -120 min mixed	1.80882e-08	0 2 3	- - 2 - - - - - 8 9 - - - -	6: excluded from mean Eff
																	7: excluded by user
																	8: included by user
																	9: manual baseline
																	if amplicon groups are defined the rules are applied per group
																	User Choices:
																	Calculation of Mean Efficiency:
																	exclude <no plateau> samples
																	exclude <efficiency outlier> samples
																	efficiency outlier defined as >5% from group median
																	Baseline Estimation:
																	log-linear phase criterion: strictly continuous Log-linear phase

## Sheet: Sample Setup
Block Type	96well
Chemistry	TAQMAN
Experiment File Name	C:\Users\SamanthaK\Desktop\ForChecking\SK10072014_1.eds
Experiment Run End Time	Not Started
Instrument Type	steponeplus
Passive Reference	ROX
Well	Sample Name	Sample Color	Biogroup Name	Biogroup Color	Target Name	Target Color	Task	Reporter	Quencher	Comments
A1	Dicer -120 min random	RGB(132,193,241)			Dicer -120 min random	RGB(139,189,249)	UNKNOWN	FAM	NFQ-MGB
A2	Dicer -120 min random	RGB(132,193,241)			Dicer -120 min random	RGB(139,189,249)	UNKNOWN	FAM	NFQ-MGB
A3	Dicer -120 min random	RGB(132,193,241)			Dicer -120 min random	RGB(139,189,249)	UNKNOWN	FAM	NFQ-MGB
A7	Ago -120 min random	RGB(132,193,241)			Ago -120 min random	RGB(244,165,230)	UNKNOWN	FAM	NFQ-MGB
A8	Ago -120 min random	RGB(132,193,241)			Ago -120 min random	RGB(244,165,230)	UNKNOWN	FAM	NFQ-MGB
A9	Ago -120 min random	RGB(132,193,241)			Ago -120 min random	RGB(244,165,230)	UNKNOWN	FAM	NFQ-MGB
E1	Dicer -120 min mixed	RGB(168,255,222)			Dicer -120 min mixed	RGB(139,189,249)	UNKNOWN	FAM	NFQ-MGB
E2	Dicer -120 min mixed	RGB(168,255,222)			Dicer -120 min mixed	RGB(139,189,249)	UNKNOWN	FAM	NFQ-MGB
E3	Dicer -120 min mixed	RGB(168,255,222)			Dicer -120 min mixed	RGB(139,189,249)	UNKNOWN	FAM	NFQ-MGB
E7	Ago -120 min mixed	RGB(168,255,222)			Ago -120 min mixed	RGB(244,165,230)	UNKNOWN	FAM	NFQ-MGB
E8	Ago -120 min mixed	RGB(168,255,222)			Ago -120 min mixed	RGB(244,165,230)	UNKNOWN	FAM	NFQ-MGB
E9	Ago -120 min mixed	RGB(168,255,222)			Ago -120 min mixed	RGB(244,165,230)	UNKNOWN	FAM	NFQ-MGB

## Sheet: Results
Block Type	96well
Chemistry	TAQMAN
Experiment File Name	C:\Users\SamanthaK\Desktop\ForChecking\SK10072014_1.eds
Experiment Run End Time	Not Started
Instrument Type	steponeplus
Passive Reference	ROX
Well	Sample Name	Target Name	Task	Reporter	Quencher	RQ	RQ Min	RQ Max	Cт	Cт Mean	Cт SD	ΔCт	ΔCт Mean	ΔCт SE	HK Control ΔCт Mean	HK Control ΔCт SE	ΔΔCт	Automatic Ct Threshold	Ct Threshold	Automatic Baseline	Baseline Start	Baseline End	Efficiency	Comments	AMPNC	HIGHSD	NOISE	CTFAIL
A1	1B-1	Target 1	UNKNOWN	FAM	NFQ-MGB				28.3189	28.557	0.267901							FALSE	0.578441	FALSE	1	1	1		N	N	N	N
A2	1B-1	Target 1	UNKNOWN	FAM	NFQ-MGB				28.5051	28.557	0.267901							FALSE	0.578441	FALSE	1	1	1		N	N	N	N
A3	1B-1	Target 1	UNKNOWN	FAM	NFQ-MGB				28.8471	28.557	0.267901							FALSE	0.578441	FALSE	1	1	1		N	N	N	N
A4	1B-1	Target 2	UNKNOWN	FAM	NFQ-MGB	1	0.436432	2.29131	26.3202	26.9859	0.696468		-1.57113	0.430828			0	FALSE	0.387058	FALSE	1	1	1		N	Y	N	N
A5	1B-1	Target 2	UNKNOWN	FAM	NFQ-MGB	1	0.436432	2.29131	26.9279	26.9859	0.696468		-1.57113	0.430828			0	FALSE	0.387058	FALSE	1	1	1		N	Y	N	N
A6	1B-1	Target 2	UNKNOWN	FAM	NFQ-MGB	1	0.436432	2.29131	27.7095	26.9859	0.696468		-1.57113	0.430828			0	FALSE	0.387058	FALSE	1	1	1		N	Y	N	N
A7	1B-1	Target 3	UNKNOWN	FAM	NFQ-MGB	1	0.213835	4.67651	29.8719	28.3336	1.36221		-0.223413	0.80154			0	FALSE	0.491044	FALSE	1	1	1		N	Y	N	N
A8	1B-1	Target 3	UNKNOWN	FAM	NFQ-MGB	1	0.213835	4.67651	27.8487	28.3336	1.36221		-0.223413	0.80154			0	FALSE	0.491044	FALSE	1	1	1		N	Y	N	N
A9	1B-1	Target 3	UNKNOWN	FAM	NFQ-MGB	1	0.213835	4.67651	27.2802	28.3336	1.36221		-0.223413	0.80154			0	FALSE	0.491044	FALSE	1	1	1		N	Y	N	N
A10	1B-1	Target 4	UNKNOWN	FAM	NFQ-MGB	1	0.535333	1.868	28.3721	28.4259	0.494475		-0.131141	0.324693			0	FALSE	0.715778	FALSE	1	1	1		N	N	N	N
A11	1B-1	Target 4	UNKNOWN	FAM	NFQ-MGB	1	0.535333	1.868	28.945	28.4259	0.494475		-0.131141	0.324693			0	FALSE	0.715778	FALSE	1	1	1		N	N	N	N
A12	1B-1	Target 4	UNKNOWN	FAM	NFQ-MGB	1	0.535333	1.868	27.9605	28.4259	0.494475		-0.131141	0.324693			0	FALSE	0.715778	FALSE	1	1	1		N	N	N	N
B1	1B-1	Target 5	UNKNOWN	FAM	NFQ-MGB	1	0.620534	1.61152	27.953	27.5777	0.335658		-0.979301	0.24795			0	FALSE	0.641674	FALSE	1	1	1		N	N	N	N
B2	1B-1	Target 5	UNKNOWN	FAM	NFQ-MGB	1	0.620534	1.61152	27.3061	27.5777	0.335658		-0.979301	0.24795			0	FALSE	0.641674	FALSE	1	1	1		N	N	N	N
B3	1B-1	Target 5	UNKNOWN	FAM	NFQ-MGB	1	0.620534	1.61152	27.4741	27.5777	0.335658		-0.979301	0.24795			0	FALSE	0.641674	FALSE	1	1	1		N	N	N	N
B4	1B-1	Target 6	UNKNOWN	FAM	NFQ-MGB	1			18.6796	18.6796			-9.87746				0	FALSE	0.0250763	FALSE	1	1	1		N	N	N	N
B5	1B-1	Target 6	UNKNOWN	FAM	NFQ-MGB				Undetermined	18.6796								FALSE	0.0250763	FALSE	1	1	1		N	N	N	N
B6	1B-1	Target 6	UNKNOWN	FAM	NFQ-MGB				Undetermined	18.6796								FALSE	0.0250763	FALSE	1	1	1		N	N	N	N
B7	1B-1	Target 7	UNKNOWN	FAM	NFQ-MGB	1	0.73638	1.358	24.4753	24.4051	0.0638753		-4.15192	0.159009			0	FALSE	0.0740542	FALSE	1	1	1		N	N	N	N
B8	1B-1	Target 7	UNKNOWN	FAM	NFQ-MGB	1	0.73638	1.358	24.3505	24.4051	0.0638753		-4.15192	0.159009			0	FALSE	0.0740542	FALSE	1	1	1		N	N	N	N
B9	1B-1	Target 7	UNKNOWN	FAM	NFQ-MGB	1	0.73638	1.358	24.3895	24.4051	0.0638753		-4.15192	0.159009			0	FALSE	0.0740542	FALSE	1	1	1		N	N	N	N
B10	1B-1	Target 8	UNKNOWN	VIC	NFQ-MGB	1	0.105206	9.50518	6.02988	7.26374	2.00889		-21.2933	1.1701			0	FALSE	0.0166787	FALSE	1	1	1		N	Y	N	N
B11	1B-1	Target 8	UNKNOWN	VIC	NFQ-MGB	1	0.105206	9.50518	9.58179	7.26374	2.00889		-21.2933	1.1701			0	FALSE	0.0166787	FALSE	1	1	1		N	Y	N	N
B12	1B-1	Target 8	UNKNOWN	VIC	NFQ-MGB	1	0.105206	9.50518	6.17955	7.26374	2.00889		-21.2933	1.1701			0	FALSE	0.0166787	FALSE	1	1	1		N	Y	N	N
E1	2B-1	Target 1	UNKNOWN	FAM	NFQ-MGB				26.449	26.5308	0.202864							FALSE	0.578441	FALSE	1	1	1		N	N	N	N
E2	2B-1	Target 1	UNKNOWN	FAM	NFQ-MGB				26.3816	26.5308	0.202864							FALSE	0.578441	FALSE	1	1	1		N	N	N	N
E3	2B-1	Target 1	UNKNOWN	FAM	NFQ-MGB				26.7618	26.5308	0.202864							FALSE	0.578441	FALSE	1	1	1		N	N	N	N
E4	2B-1	Target 2	UNKNOWN	FAM	NFQ-MGB	1.10628	0.764174	1.60154	24.616	24.8139	0.264036		-1.71684	0.19224			-0.145717	FALSE	0.387058	FALSE	1	1	1		N	N	N	N
E5	2B-1	Target 2	UNKNOWN	FAM	NFQ-MGB	1.10628	0.764174	1.60154	25.1137	24.8139	0.264036		-1.71684	0.19224			-0.145717	FALSE	0.387058	FALSE	1	1	1		N	N	N	N
E6	2B-1	Target 2	UNKNOWN	FAM	NFQ-MGB	1.10628	0.764174	1.60154	24.7121	24.8139	0.264036		-1.71684	0.19224			-0.145717	FALSE	0.387058	FALSE	1	1	1		N	N	N	N
E7	2B-1	Target 3	UNKNOWN	FAM	NFQ-MGB	0.668209	0.468451	0.953149	26.605	26.889	0.247034		0.358215	0.184553			0.581628	FALSE	0.491044	FALSE	1	1	1		N	N	N	N
E8	2B-1	Target 3	UNKNOWN	FAM	NFQ-MGB	0.668209	0.468451	0.953149	27.008	26.889	0.247034		0.358215	0.184553			0.581628	FALSE	0.491044	FALSE	1	1	1		N	N	N	N
E9	2B-1	Target 3	UNKNOWN	FAM	NFQ-MGB	0.668209	0.468451	0.953149	27.0541	26.889	0.247034		0.358215	0.184553			0.581628	FALSE	0.491044	FALSE	1	1	1		N	N	N	N
E10	2B-1	Target 4	UNKNOWN	FAM	NFQ-MGB	0.937738	0.431876	2.03612	26.2958	26.4924	0.667666		-0.0383981	0.402878			0.0927429	FALSE	0.715778	FALSE	1	1	1		N	Y	N	N
E11	2B-1	Target 4	UNKNOWN	FAM	NFQ-MGB	0.937738	0.431876	2.03612	25.9451	26.4924	0.667666		-0.0383981	0.402878			0.0927429	FALSE	0.715778	FALSE	1	1	1		N	Y	N	N
E12	2B-1	Target 4	UNKNOWN	FAM	NFQ-MGB	0.937738	0.431876	2.03612	27.2363	26.4924	0.667666		-0.0383981	0.402878			0.0927429	FALSE	0.715778	FALSE	1	1	1		N	Y	N	N
F1	2B-1	Target 5	UNKNOWN	FAM	NFQ-MGB	0.881888	0.389283	1.99784	26.5379	25.7328	0.707479		-0.797968	0.424924			0.181333	FALSE	0.641674	FALSE	1	1	1		N	Y	N	N
F2	2B-1	Target 5	UNKNOWN	FAM	NFQ-MGB	0.881888	0.389283	1.99784	25.4505	25.7328	0.707479		-0.797968	0.424924			0.181333	FALSE	0.641674	FALSE	1	1	1		N	Y	N	N
F3	2B-1	Target 5	UNKNOWN	FAM	NFQ-MGB	0.881888	0.389283	1.99784	25.2101	25.7328	0.707479		-0.797968	0.424924			0.181333	FALSE	0.641674	FALSE	1	1	1		N	Y	N	N
F4	2B-1	Target 6	UNKNOWN	FAM	NFQ-MGB				Undetermined									FALSE	0.0250763	FALSE	1	1	1		N	N	Y	N
F5	2B-1	Target 6	UNKNOWN	FAM	NFQ-MGB				Undetermined									FALSE	0.0250763	FALSE	1	1	1		N	N	N	N
F6	2B-1	Target 6	UNKNOWN	FAM	NFQ-MGB				Undetermined									FALSE	0.0250763	FALSE	1	1	1		N	N	N	N
F7	2B-1	Target 7	UNKNOWN	FAM	NFQ-MGB	0.673688	0.171413	2.64774	21.5747	22.9487	1.21502		-3.58207	0.7112			0.569846	FALSE	0.0740542	FALSE	1	1	1		N	Y	N	N
F8	2B-1	Target 7	UNKNOWN	FAM	NFQ-MGB	0.673688	0.171413	2.64774	23.8815	22.9487	1.21502		-3.58207	0.7112			0.569846	FALSE	0.0740542	FALSE	1	1	1		N	Y	N	N
F9	2B-1	Target 7	UNKNOWN	FAM	NFQ-MGB	0.673688	0.171413	2.64774	23.39	22.9487	1.21502		-3.58207	0.7112			0.569846	FALSE	0.0740542	FALSE	1	1	1		N	Y	N	N
F10	2B-1	Target 8	UNKNOWN	VIC	NFQ-MGB	0.0798097	7.20799e-05	88.3685	5.42302	8.88481	6.30545		-17.646	3.64234			3.64729	FALSE	0.0166787	FALSE	1	1	1		N	Y	N	N
F11	2B-1	Target 8	UNKNOWN	VIC	NFQ-MGB	0.0798097	7.20799e-05	88.3685	5.06856	8.88481	6.30545		-17.646	3.64234			3.64729	FALSE	0.0166787	FALSE	1	1	1		N	Y	N	N
F12	2B-1	Target 8	UNKNOWN	VIC	NFQ-MGB	0.0798097	7.20799e-05	88.3685	16.1628	8.88481	6.30545		-17.646	3.64234			3.64729	FALSE	0.0166787	FALSE	1	1	1		N	Y	N	N
G1		Target 1	NTC	FAM	NFQ-MGB				Undetermined									FALSE	0.578441	FALSE	1	1	1		N	N	N	N
G2		Target 1	NTC	FAM	NFQ-MGB				Undetermined									FALSE	0.578441	FALSE	1	1	1		N	N	N	N
G3		Target 1	NTC	FAM	NFQ-MGB				34.9292									FALSE	0.578441	FALSE	1	1	1		Y	N	N	N
G4		Target 2	NTC	FAM	NFQ-MGB				36.6118									FALSE	0.387058	FALSE	1	1	1		N	N	N	N
G5		Target 2	NTC	FAM	NFQ-MGB				Undetermined									FALSE	0.387058	FALSE	1	1	1		N	N	N	N
G6		Target 2	NTC	FAM	NFQ-MGB				Undetermined									FALSE	0.387058	FALSE	1	1	1		N	N	N	N
G7		Target 3	NTC	FAM	NFQ-MGB				34.8433									FALSE	0.491044	FALSE	1	1	1		Y	N	N	N
G8		Target 3	NTC	FAM	NFQ-MGB				35.2758									FALSE	0.491044	FALSE	1	1	1		N	N	N	N
G9		Target 3	NTC	FAM	NFQ-MGB				34.2574									FALSE	0.491044	FALSE	1	1	1		Y	N	N	N
G10		Target 4	NTC	FAM	NFQ-MGB				Undetermined									FALSE	0.715778	FALSE	1	1	1		N	N	N	N
G11		Target 4	NTC	FAM	NFQ-MGB				Undetermined									FALSE	0.715778	FALSE	1	1	1		N	N	N	N
G12		Target 4	NTC	FAM	NFQ-MGB				Undetermined									FALSE	0.715778	FALSE	1	1	1		N	N	N	N
H1		Target 5	NTC	FAM	NFQ-MGB				Undetermined									FALSE	0.641674	FALSE	1	1	1		N	N	N	N
H2		Target 5	NTC	FAM	NFQ-MGB				Undetermined									FALSE	0.641674	FALSE	1	1	1		N	N	N	N
H3		Target 5	NTC	FAM	NFQ-MGB				Undetermined									FALSE	0.641674	FALSE	1	1	1		N	N	N	N
H4		Target 6	NTC	FAM	NFQ-MGB				Undetermined									FALSE	0.0250763	FALSE	1	1	1		N	N	N	N
H5		Target 6	NTC	FAM	NFQ-MGB				Undetermined									FALSE	0.0250763	FALSE	1	1	1		N	N	N	N
H6		Target 6	NTC	FAM	NFQ-MGB				Undetermined									FALSE	0.0250763	FALSE	1	1	1		N	N	N	Y
H7		Target 7	NTC	FAM	NFQ-MGB				Undetermined									FALSE	0.0740542	FALSE	1	1	1		N	N	N	N
H8		Target 7	NTC	FAM	NFQ-MGB				Undetermined									FALSE	0.0740542	FALSE	1	1	1		N	N	N	N
H9		Target 7	NTC	FAM	NFQ-MGB				Undetermined									FALSE	0.0740542	FALSE	1	1	1		N	N	N	N
H10		Target 8	NTC	VIC	NFQ-MGB				10.5498									FALSE	0.0166787	FALSE	1	1	1		Y	N	N	N
H11		Target 8	NTC	VIC	NFQ-MGB				10.0606									FALSE	0.0166787	FALSE	1	1	1		Y	N	N	N
H12		Target 8	NTC	VIC	NFQ-MGB				19.8141									FALSE	0.0166787	FALSE	1	1	1		Y	N	N	N
Analysis Type	Singleplex
Endogenous Control	Target 1
RQ Min/Max Confidence Level	95.0
Reference Sample	1B-1

## Sheet: Raw Data
Block Type	96well
Chemistry	TAQMAN
Experiment File Name	C:\Users\SamanthaK\Desktop\ForChecking\SK10072014_1.eds
Experiment Run End Time	Not Started
Instrument Type	steponeplus
Passive Reference	ROX
Well	Cycle	BLUE	GREEN	YELLOW	RED
A1	1	9171	4337	2687	3448
A2	1	9496	4495	2808	3561
A3	1	11395	5275	3070	3597
A4	1	4648	2121	1898	3425
A5	1	4844	2254	1984	3522
A6	1	4702	2145	1921	3448
A7	1	8891	4030	2421	3094
A8	1	10282	4583	2523	2926
A9	1	11718	5245	2788	3053
A10	1	7504	3421	2251	3235
A11	1	6208	2816	1878	2781
A12	1	7829	3650	2361	3214
B1	1	6946	3177	2209	3237
B2	1	9512	4433	2659	3342
B3	1	11046	5078	2979	3570
B4	1	10824	5145	3506	5031
B5	1	22877	10583	5055	4269
B6	1	26358	11994	5627	4660
B7	1	2542	1266	2049	4648
B8	1	6014	2882	2310	3856
B9	1	4609	2129	2019	3756
B10	1	706	1773	2612	4945
B11	1	646	3776	3382	4001
B12	1	574	2418	2878	4683
C1	1	248	177	198	205
C2	1	288	180	173	182
C3	1	311	203	186	193
C4	1	232	117	127	131
C5	1	362	213	193	198
C6	1	196	117	122	124
C7	1	108	39	64	76
C8	1	215	126	135	133
C9	1	153	98	96	110
C10	1	191	132	114	124
C11	1	183	135	133	120
C12	1	312	209	182	186
D1	1	313	202	190	181
D2	1	-3	-7	32	63
D3	1	256	157	161	147
D4	1	267	149	155	168
D5	1	229	106	109	123
D6	1	249	158	146	155
D7	1	191	69	88	98
D8	1	187	109	124	122
D9	1	151	61	83	103
D10	1	178	109	120	112
D11	1	232	148	146	156
D12	1	322	199	193	176
E1	1	11613	5405	3143	3737
E2	1	12227	5483	2867	2964
E3	1	12444	5648	2966	3075
E4	1	5491	2501	1960	3251
E5	1	7357	3254	1929	2472
E6	1	8066	3576	2165	2830
E7	1	11538	4960	2473	2459
E8	1	12622	5711	2926	2969
E9	1	13364	5979	2969	2971
E10	1	7651	3429	1978	2569
E11	1	7733	3469	1996	2512
E12	1	7353	3357	1932	2425
F1	1	10632	4929	2766	3141
F2	1	11013	5023	2769	3073
F3	1	12216	5525	2941	3084
F4	1	24818	11538	5272	3877
F5	1	28714	13172	5831	4064
F6	1	27746	12588	5441	3670
F7	1	6935	3111	2075	2996
F8	1	8347	3868	2460	3365
F9	1	7711	3454	2127	2893
F10	1	512	2544	2863	4483
F11	1	357	2965	2933	4006
F12	1	517	4114	3674	3891
G1	1	12971	6075	3289	3523
G2	1	13643	6347	3329	3382
G3	1	15322	7013	3585	3541
G4	1	7256	3300	2254	3268
G5	1	7867	3619	2175	2797
G6	1	8588	3864	2223	2740
G7	1	12523	5807	3023	3151
G8	1	12318	5609	2848	2876
G9	1	12952	5827	2941	2938
G10	1	7924	3553	2009	2508
G11	1	7433	3354	1915	2412
G12	1	7545	3477	1985	2496
H1	1	10620	4944	2657	2839
H2	1	10728	4998	2680	2853
H3	1	11972	5544	3036	3333
H4	1	29225	13606	5953	3857
H5	1	23284	10831	4729	3162
H6	1	15304	7069	3212	2521
H7	1	9526	4388	2438	2858
H8	1	9605	4479	2527	3006
H9	1	9869	4496	2300	2445
H10	1	477	3577	3352	4165
H11	1	417	4025	3534	4000
H12	1	572	4676	3969	4139
A1	2	9211	4340	2665	3427
A2	2	9626	4507	2807	3579
A3	2	11561	5322	3086	3624
A4	2	4770	2175	1940	3487
A5	2	4955	2281	2010	3574
A6	2	4721	2148	1936	3465
A7	2	8987	4074	2438	3125
A8	2	10418	4631	2548	2943
A9	2	11891	5325	2810	3088
A10	2	7573	3452	2255	3257
A11	2	6291	2833	1921	2821
A12	2	7910	3671	2355	3220
B1	2	7034	3200	2229	3250
B2	2	9969	4608	2769	3449
B3	2	11466	5230	3064	3674
B4	2	11266	5332	3632	5203
B5	2	23682	10912	5194	4381
B6	2	27373	12396	5795	4787
B7	2	2642	1318	2121	4753
B8	2	6231	2957	2384	3941
B9	2	4767	2193	2077	3839
B10	2	749	1837	2675	5041
B11	2	676	3892	3448	4087
B12	2	576	2469	2928	4737
C1	2	214	155	179	172
C2	2	275	200	179	186
C3	2	310	214	197	188
C4	2	276	147	143	146
C5	2	406	249	206	208
C6	2	222	109	127	140
C7	2	128	59	73	93
C8	2	216	137	137	146
C9	2	181	120	130	144
C10	2	193	130	117	142
C11	2	211	129	144	125
C12	2	361	232	201	182
D1	2	322	210	192	188
D2	2	-6	2	42	62
D3	2	263	153	161	149
D4	2	289	181	162	168
D5	2	250	109	112	119
D6	2	274	158	157	179
D7	2	180	79	82	87
D8	2	209	143	135	126
D9	2	157	90	95	101
D10	2	202	130	120	109
D11	2	277	162	152	175
D12	2	357	212	200	175
E1	2	11813	5487	3174	3767
E2	2	12722	5687	2957	3056
E3	2	12823	5803	3027	3134
E4	2	5697	2593	2025	3314
E5	2	7597	3365	1979	2567
E6	2	8248	3654	2212	2880
E7	2	11898	5112	2542	2559
E8	2	13013	5861	2990	3034
E9	2	13831	6159	3066	3063
E10	2	7880	3506	2046	2633
E11	2	7987	3564	2058	2576
E12	2	7478	3412	1943	2452
F1	2	10752	4977	2793	3179
F2	2	11452	5215	2858	3171
F3	2	12613	5717	3008	3170
F4	2	25455	11749	5338	3924
F5	2	29723	13589	5997	4173
F6	2	28506	12882	5556	3737
F7	2	7182	3182	2122	3051
F8	2	8639	3980	2516	3452
F9	2	7946	3556	2184	2963
F10	2	527	2627	2940	4584
F11	2	396	3073	3012	4104
F12	2	502	4125	3692	3915
G1	2	13173	6161	3339	3589
G2	2	13876	6425	3344	3415
G3	2	15759	7180	3697	3657
G4	2	7327	3365	2300	3367
G5	2	7923	3637	2205	2862
G6	2	8617	3873	2236	2784
G7	2	12905	5950	3094	3204
G8	2	12639	5726	2901	2944
G9	2	13361	5999	3009	3025
G10	2	8164	3655	2056	2557
G11	2	7559	3410	1931	2459
G12	2	7610	3513	2003	2516
H1	2	10545	4882	2620	2806
H2	2	10728	4991	2671	2845
H3	2	11881	5472	2987	3294
H4	2	29244	13589	5939	3832
H5	2	23280	10787	4688	3122
H6	2	15363	7073	3210	2488
H7	2	9601	4416	2440	2885
H8	2	9753	4515	2553	3022
H9	2	9941	4502	2300	2456
H10	2	497	3619	3383	4230
H11	2	431	4050	3576	4036
H12	2	584	4697	3994	4166
A1	3	9321	4369	2687	3435
A2	3	9832	4591	2855	3626
A3	3	11768	5419	3126	3657
A4	3	4903	2232	1998	3583
A5	3	5044	2307	2041	3622
A6	3	4829	2196	1976	3541
A7	3	9137	4132	2466	3156
A8	3	10570	4705	2589	2994
A9	3	12052	5381	2846	3115
A10	3	7630	3486	2293	3287
A11	3	6304	2833	1900	2813
A12	3	7995	3704	2396	3254
B1	3	7078	3210	2221	3260
B2	3	9979	4617	2757	3449
B3	3	11554	5263	3073	3696
B4	3	11369	5380	3678	5264
B5	3	23898	10996	5231	4419
B6	3	27766	12563	5872	4859
B7	3	2643	1309	2115	4781
B8	3	6284	2980	2396	3978
B9	3	4816	2228	2092	3892
B10	3	757	1850	2678	5070
B11	3	677	3914	3503	4139
B12	3	578	2499	2937	4782
C1	3	226	174	190	179
C2	3	301	203	198	183
C3	3	344	218	226	211
C4	3	323	182	170	155
C5	3	437	263	239	215
C6	3	240	129	132	152
C7	3	133	73	77	87
C8	3	250	172	157	149
C9	3	193	127	122	140
C10	3	237	137	114	138
C11	3	210	121	146	137
C12	3	369	252	207	211
D1	3	331	212	198	187
D2	3	36	1	58	67
D3	3	293	171	168	167
D4	3	325	191	179	186
D5	3	278	136	137	114
D6	3	295	170	155	166
D7	3	231	95	93	102
D8	3	225	124	132	143
D9	3	182	85	93	116
D10	3	216	142	138	133
D11	3	285	173	161	165
D12	3	369	237	215	208
E1	3	11954	5563	3193	3800
E2	3	12903	5749	2992	3110
E3	3	12969	5852	3049	3164
E4	3	5747	2593	2021	3329
E5	3	7582	3331	1974	2530
E6	3	8319	3671	2227	2916
E7	3	12096	5181	2578	2582
E8	3	13153	5915	3020	3052
E9	3	13952	6220	3097	3074
E10	3	7980	3564	2061	2665
E11	3	8009	3574	2057	2577
E12	3	7616	3473	1998	2506
F1	3	10905	5044	2812	3226
F2	3	11621	5294	2903	3231
F3	3	12794	5765	3057	3218
F4	3	25585	11759	5320	3899
F5	3	29916	13637	6013	4168
F6	3	28919	13045	5621	3777
F7	3	7327	3270	2173	3105
F8	3	8744	4028	2553	3505
F9	3	8064	3616	2199	3001
F10	3	525	2658	2972	4635
F11	3	378	3041	2989	4100
F12	3	513	4166	3731	3961
G1	3	13260	6189	3363	3610
G2	3	13846	6401	3344	3410
G3	3	15751	7173	3670	3646
G4	3	7282	3338	2324	3395
G5	3	7882	3640	2231	2929
G6	3	8463	3810	2216	2782
G7	3	12958	5963	3100	3232
G8	3	12749	5771	2925	2966
G9	3	13547	6071	3039	3069
G10	3	8230	3677	2073	2565
G11	3	7603	3401	1944	2449
G12	3	7720	3557	2028	2566
H1	3	10544	4886	2629	2828
H2	3	10782	4992	2682	2865
H3	3	12073	5564	3054	3344
H4	3	29568	13690	5969	3849
H5	3	23535	10878	4735	3161
H6	3	15576	7173	3244	2513
H7	3	9747	4471	2488	2920
H8	3	9884	4583	2571	3057
H9	3	10140	4584	2345	2510
H10	3	522	3672	3439	4304
H11	3	442	4107	3627	4103
H12	3	593	4706	4005	4201
A1	4	9419	4398	2689	3482
A2	4	9969	4646	2876	3660
A3	4	11939	5448	3141	3702
A4	4	4987	2269	2031	3652
A5	4	5109	2342	2054	3663
A6	4	4888	2220	1988	3586
A7	4	9232	4173	2493	3185
A8	4	10726	4763	2605	3024
A9	4	12185	5437	2867	3146
A10	4	7756	3525	2313	3314
A11	4	6383	2879	1923	2831
A12	4	8060	3742	2398	3289
B1	4	7114	3215	2239	3279
B2	4	9966	4600	2751	3437
B3	4	11599	5288	3091	3722
B4	4	11448	5427	3694	5294
B5	4	24075	11076	5267	4439
B6	4	27952	12630	5911	4877
B7	4	2662	1331	2135	4808
B8	4	6304	2981	2405	3976
B9	4	4898	2282	2122	3956
B10	4	768	1872	2712	5132
B11	4	661	3930	3498	4148
B12	4	599	2520	2991	4835
C1	4	235	186	180	175
C2	4	324	217	200	213
C3	4	333	227	199	208
C4	4	344	189	181	174
C5	4	446	273	230	211
C6	4	248	136	148	155
C7	4	162	74	86	102
C8	4	267	169	149	154
C9	4	226	139	130	137
C10	4	235	156	124	144
C11	4	244	157	145	155
C12	4	389	267	221	222
D1	4	338	218	186	199
D2	4	42	24	77	106
D3	4	299	178	167	155
D4	4	353	202	174	192
D5	4	295	146	126	132
D6	4	308	188	170	174
D7	4	245	105	107	113
D8	4	233	150	148	137
D9	4	187	95	99	119
D10	4	238	143	151	157
D11	4	318	191	175	178
D12	4	402	250	220	198
E1	4	12058	5589	3230	3844
E2	4	13052	5821	3013	3158
E3	4	13060	5896	3062	3184
E4	4	5772	2593	2034	3340
E5	4	7582	3339	1981	2540
E6	4	8350	3682	2231	2948
E7	4	12193	5216	2598	2596
E8	4	13204	5946	3024	3074
E9	4	14012	6236	3095	3084
E10	4	8100	3611	2108	2693
E11	4	8086	3599	2066	2581
E12	4	7661	3478	1994	2513
F1	4	10991	5072	2840	3242
F2	4	11666	5291	2902	3219
F3	4	12848	5791	3049	3213
F4	4	25648	11804	5347	3914
F5	4	30230	13781	6079	4230
F6	4	29087	13116	5664	3811
F7	4	7364	3296	2197	3135
F8	4	8775	4046	2559	3515
F9	4	8094	3614	2206	3027
F10	4	572	2710	3033	4717
F11	4	369	3068	3021	4098
F12	4	518	4156	3733	3956
G1	4	13314	6222	3378	3654
G2	4	13842	6412	3359	3444
G3	4	15737	7170	3672	3672
G4	4	7234	3320	2310	3425
G5	4	7780	3593	2208	2926
G6	4	8324	3743	2211	2796
G7	4	13061	6006	3120	3234
G8	4	12855	5813	2942	2984
G9	4	13653	6120	3080	3106
G10	4	8324	3723	2098	2624
G11	4	7616	3429	1946	2460
G12	4	7736	3557	2036	2549
H1	4	10465	4841	2596	2804
H2	4	10810	4993	2692	2885
H3	4	12123	5584	3057	3384
H4	4	29801	13766	5993	3870
H5	4	23817	10991	4766	3191
H6	4	15755	7241	3280	2526
H7	4	9848	4522	2510	2957
H8	4	9984	4628	2613	3106
H9	4	10261	4638	2381	2532
H10	4	525	3697	3477	4336
H11	4	452	4176	3682	4167
H12	4	599	4747	4057	4234
A1	5	9514	4453	2730	3518
A2	5	10107	4686	2910	3697
A3	5	12064	5511	3172	3739
A4	5	4962	2233	2011	3583
A5	5	5139	2366	2074	3685
A6	5	4930	2226	2013	3590
A7	5	9332	4216	2505	3216
A8	5	10845	4816	2643	3063
A9	5	12272	5480	2898	3163
A10	5	7801	3539	2333	3331
A11	5	6407	2884	1922	2842
A12	5	8100	3761	2405	3306
B1	5	7133	3225	2231	3279
B2	5	10019	4611	2781	3457
B3	5	11627	5302	3118	3730
B4	5	11557	5461	3701	5293
B5	5	24296	11189	5330	4503
B6	5	28143	12734	5959	4918
B7	5	2703	1352	2160	4868
B8	5	6297	2990	2402	3980
B9	5	4897	2266	2135	3963
B10	5	786	1903	2747	5159
B11	5	659	3928	3496	4142
B12	5	604	2531	2991	4821
C1	5	269	186	190	205
C2	5	347	225	200	195
C3	5	369	247	217	217
C4	5	306	161	167	174
C5	5	477	295	249	237
C6	5	265	140	152	165
C7	5	175	71	98	116
C8	5	282	178	181	158
C9	5	213	147	140	141
C10	5	270	157	137	156
C11	5	227	152	150	137
C12	5	405	248	215	210
D1	5	354	220	209	191
D2	5	79	53	72	93
D3	5	304	194	174	174
D4	5	337	199	182	188
D5	5	310	157	117	129
D6	5	332	200	185	169
D7	5	260	115	109	121
D8	5	259	164	137	159
D9	5	210	116	119	117
D10	5	283	165	160	157
D11	5	304	193	179	186
D12	5	394	245	219	206
E1	5	12207	5646	3252	3862
E2	5	13115	5854	3036	3178
E3	5	13138	5923	3101	3233
E4	5	5844	2643	2087	3443
E5	5	7658	3384	2013	2595
E6	5	8422	3733	2272	2995
E7	5	12239	5226	2595	2634
E8	5	13271	5994	3051	3092
E9	5	14122	6271	3125	3117
E10	5	8121	3622	2104	2699
E11	5	8148	3622	2074	2609
E12	5	7706	3508	2003	2521
F1	5	11109	5138	2868	3304
F2	5	11732	5315	2911	3241
F3	5	12966	5850	3095	3265
F4	5	26274	12103	5502	4040
F5	5	30545	13935	6160	4276
F6	5	29404	13257	5705	3835
F7	5	7416	3309	2202	3138
F8	5	8837	4071	2571	3532
F9	5	8135	3650	2232	3032
F10	5	568	2735	3066	4744
F11	5	406	3121	3055	4159
F12	5	508	4179	3739	3971
G1	5	13218	6133	3351	3614
G2	5	13826	6391	3357	3451
G3	5	15735	7152	3667	3669
G4	5	7207	3281	2283	3380
G5	5	7702	3539	2193	2930
G6	5	8277	3728	2208	2804
G7	5	13161	6061	3156	3275
G8	5	12910	5842	2958	3002
G9	5	13697	6133	3067	3109
G10	5	8375	3746	2113	2644
G11	5	7668	3449	1947	2463
G12	5	7772	3558	2045	2561
H1	5	10552	4890	2637	2856
H2	5	10837	5013	2680	2896
H3	5	12220	5625	3098	3425
H4	5	30345	14020	6125	3948
H5	5	24050	11097	4814	3231
H6	5	15871	7305	3315	2555
H7	5	9937	4537	2526	2981
H8	5	10049	4650	2624	3133
H9	5	10327	4656	2401	2554
H10	5	522	3750	3514	4369
H11	5	487	4246	3739	4230
H12	5	595	4756	4072	4255
A1	6	9566	4484	2742	3530
A2	6	10185	4724	2932	3724
A3	6	12146	5553	3203	3765
A4	6	5082	2315	2070	3701
A5	6	5169	2382	2100	3690
A6	6	4947	2238	2027	3623
A7	6	9335	4207	2491	3205
A8	6	10904	4825	2668	3072
A9	6	12398	5536	2929	3220
A10	6	7841	3565	2342	3344
A11	6	6447	2900	1932	2864
A12	6	8112	3776	2407	3304
B1	6	7157	3244	2261	3306
B2	6	10045	4626	2766	3462
B3	6	11675	5300	3113	3741
B4	6	11611	5490	3731	5345
B5	6	24455	11258	5366	4516
B6	6	28184	12749	5962	4914
B7	6	2725	1364	2166	4891
B8	6	6339	3006	2402	4011
B9	6	4931	2276	2136	3951
B10	6	789	1914	2764	5185
B11	6	666	3936	3506	4168
B12	6	594	2574	3010	4878
C1	6	285	204	200	207
C2	6	380	249	219	215
C3	6	382	248	220	225
C4	6	367	211	198	201
C5	6	491	296	232	232
C6	6	295	161	167	157
C7	6	166	71	94	100
C8	6	308	186	175	173
C9	6	249	151	146	148
C10	6	272	165	152	162
C11	6	251	163	142	166
C12	6	415	257	209	218
D1	6	355	220	205	197
D2	6	105	48	93	104
D3	6	304	193	159	173
D4	6	375	220	181	198
D5	6	319	160	147	138
D6	6	357	215	178	185
D7	6	300	111	117	122
D8	6	281	180	158	162
D9	6	234	144	141	128
D10	6	280	172	166	182
D11	6	312	193	189	180
D12	6	402	244	240	211
E1	6	12248	5668	3267	3884
E2	6	13197	5888	3047	3189
E3	6	13097	5905	3071	3208
E4	6	5872	2638	2078	3415
E5	6	7636	3372	2023	2609
E6	6	8464	3728	2275	3001
E7	6	12295	5260	2619	2627
E8	6	13349	6000	3060	3099
E9	6	14179	6310	3139	3135
E10	6	8187	3653	2118	2719
E11	6	8147	3632	2078	2599
E12	6	7771	3531	2025	2545
F1	6	11123	5126	2862	3281
F2	6	11774	5350	2918	3268
F3	6	12910	5824	3080	3241
F4	6	25971	11942	5402	3966
F5	6	30844	14089	6213	4329
F6	6	29551	13329	5734	3869
F7	6	7476	3330	2219	3157
F8	6	8866	4063	2581	3534
F9	6	8199	3668	2253	3052
F10	6	593	2763	3074	4773
F11	6	402	3123	3061	4158
F12	6	515	4198	3768	4003
G1	6	13193	6132	3336	3617
G2	6	13957	6444	3380	3474
G3	6	15787	7189	3701	3712
G4	6	7223	3310	2328	3451
G5	6	7638	3525	2175	2904
G6	6	8258	3717	2228	2832
G7	6	13227	6099	3168	3287
G8	6	13009	5879	2966	3021
G9	6	13779	6159	3100	3108
G10	6	8432	3771	2141	2661
G11	6	7699	3475	1972	2497
G12	6	7789	3593	2049	2575
H1	6	10550	4890	2635	2873
H2	6	10830	5015	2691	2915
H3	6	12192	5610	3090	3416
H4	6	30266	13954	6098	3927
H5	6	24257	11191	4875	3254
H6	6	15952	7344	3334	2581
H7	6	9991	4568	2534	3004
H8	6	10101	4662	2632	3132
H9	6	10342	4670	2393	2563
H10	6	538	3774	3542	4396
H11	6	481	4271	3760	4262
H12	6	609	4765	4101	4284
A1	7	9664	4533	2770	3586
A2	7	10205	4745	2915	3734
A3	7	12228	5591	3219	3801
A4	7	5101	2334	2079	3718
A5	7	5173	2387	2086	3720
A6	7	4959	2250	2039	3634
A7	7	9366	4228	2512	3218
A8	7	10853	4825	2642	3060
A9	7	12360	5506	2914	3198
A10	7	7833	3563	2336	3363
A11	7	6440	2906	1939	2864
A12	7	8154	3782	2430	3322
B1	7	7149	3241	2255	3320
B2	7	10113	4649	2790	3497
B3	7	11732	5344	3117	3774
B4	7	11690	5521	3742	5390
B5	7	24473	11275	5361	4524
B6	7	28296	12788	5986	4941
B7	7	2747	1368	2170	4907
B8	7	6437	3042	2436	4069
B9	7	4985	2310	2159	4033
B10	7	798	1934	2760	5183
B11	7	696	3983	3547	4203
B12	7	587	2564	3023	4870
C1	7	311	224	207	208
C2	7	397	254	227	215
C3	7	405	268	235	222
C4	7	397	229	186	205
C5	7	490	298	248	252
C6	7	298	177	152	173
C7	7	198	99	95	101
C8	7	343	209	184	177
C9	7	260	159	148	155
C10	7	300	183	165	180
C11	7	254	157	148	138
C12	7	402	254	221	233
D1	7	364	248	214	205
D2	7	145	88	105	124
D3	7	348	206	184	190
D4	7	377	232	203	199
D5	7	318	157	134	144
D6	7	367	218	172	198
D7	7	284	128	98	134
D8	7	289	200	179	178
D9	7	246	137	155	137
D10	7	308	186	177	162
D11	7	317	197	182	185
D12	7	406	249	218	203
E1	7	12310	5703	3285	3890
E2	7	13370	5967	3102	3230
E3	7	13147	5927	3104	3224
E4	7	5886	2643	2072	3422
E5	7	7642	3372	2005	2621
E6	7	8451	3740	2279	3000
E7	7	12351	5291	2632	2631
E8	7	13375	6024	3060	3109
E9	7	14232	6322	3141	3146
E10	7	8183	3673	2131	2717
E11	7	8152	3610	2077	2607
E12	7	7789	3542	2040	2542
F1	7	11148	5143	2884	3305
F2	7	11950	5423	2979	3324
F3	7	12911	5840	3084	3257
F4	7	25916	11915	5407	3934
F5	7	31015	14164	6261	4363
F6	7	29589	13352	5760	3868
F7	7	7505	3345	2218	3175
F8	7	8918	4094	2601	3545
F9	7	8248	3694	2252	3077
F10	7	580	2769	3066	4761
F11	7	411	3151	3071	4170
F12	7	516	4222	3775	4001
G1	7	13226	6148	3343	3638
G2	7	13889	6418	3371	3471
G3	7	15876	7234	3722	3711
G4	7	7190	3299	2340	3487
G5	7	7621	3521	2190	2926
G6	7	8239	3708	2220	2847
G7	7	13290	6127	3180	3299
G8	7	13086	5912	3000	3039
G9	7	13871	6193	3108	3136
G10	7	8472	3798	2136	2675
G11	7	7728	3497	1987	2498
G12	7	7783	3571	2058	2580
H1	7	10523	4884	2642	2870
H2	7	10869	5030	2704	2927
H3	7	12200	5623	3084	3449
H4	7	30307	13978	6102	3943
H5	7	24369	11243	4900	3279
H6	7	15979	7357	3328	2590
H7	7	10017	4581	2558	3023
H8	7	10093	4663	2640	3162
H9	7	10379	4690	2402	2584
H10	7	548	3808	3560	4416
H11	7	510	4293	3766	4278
H12	7	608	4774	4107	4273
A1	8	9632	4512	2767	3563
A2	8	10223	4740	2932	3736
A3	8	12247	5609	3231	3790
A4	8	5132	2329	2113	3747
A5	8	5171	2371	2079	3704
A6	8	4933	2246	2016	3624
A7	8	9419	4244	2541	3239
A8	8	10969	4864	2673	3084
A9	8	12373	5527	2920	3208
A10	8	7859	3568	2364	3357
A11	8	6447	2918	1947	2875
A12	8	8169	3778	2414	3324
B1	8	7154	3223	2245	3309
B2	8	10136	4675	2786	3515
B3	8	11819	5389	3159	3817
B4	8	11705	5534	3758	5389
B5	8	24615	11334	5385	4558
B6	8	28407	12853	6000	4953
B7	8	2755	1377	2182	4925
B8	8	6402	3039	2444	4039
B9	8	4988	2320	2159	4034
B10	8	827	1962	2800	5233
B11	8	694	3986	3546	4221
B12	8	610	2593	3027	4884
C1	8	320	213	209	205
C2	8	415	267	236	224
C3	8	415	278	223	230
C4	8	408	250	216	197
C5	8	500	303	242	248
C6	8	323	182	169	177
C7	8	218	107	105	129
C8	8	352	223	181	191
C9	8	285	185	165	162
C10	8	314	191	160	170
C11	8	262	177	154	155
C12	8	417	271	220	221
D1	8	351	246	213	207
D2	8	155	106	110	119
D3	8	302	192	178	156
D4	8	369	242	192	202
D5	8	323	159	147	160
D6	8	351	209	196	195
D7	8	310	135	130	126
D8	8	316	202	180	179
D9	8	258	153	140	141
D10	8	319	204	178	168
D11	8	347	214	184	190
D12	8	396	249	209	204
E1	8	12268	5668	3288	3894
E2	8	13358	5959	3096	3227
E3	8	13142	5910	3088	3207
E4	8	5895	2642	2077	3413
E5	8	7767	3462	2075	2704
E6	8	8424	3726	2265	3007
E7	8	12343	5285	2628	2637
E8	8	13469	6063	3082	3139
E9	8	14270	6344	3146	3141
E10	8	8287	3701	2148	2753
E11	8	8206	3642	2062	2601
E12	8	7839	3553	2039	2569
F1	8	11127	5140	2871	3293
F2	8	11905	5421	2980	3313
F3	8	12928	5830	3091	3253
F4	8	25972	11908	5387	3947
F5	8	31312	14332	6335	4411
F6	8	29662	13373	5769	3877
F7	8	7504	3322	2212	3153
F8	8	8940	4104	2606	3566
F9	8	8271	3703	2259	3066
F10	8	599	2809	3102	4799
F11	8	436	3184	3105	4220
F12	8	527	4241	3799	4042
G1	8	13260	6175	3351	3658
G2	8	13834	6387	3361	3458
G3	8	15941	7270	3744	3752
G4	8	7204	3305	2343	3510
G5	8	7493	3438	2144	2868
G6	8	8144	3677	2194	2826
G7	8	13346	6136	3191	3322
G8	8	13122	5936	3007	3058
G9	8	13907	6215	3123	3153
G10	8	8518	3807	2167	2684
G11	8	7755	3492	1987	2519
G12	8	7825	3601	2058	2598
H1	8	10510	4867	2632	2867
H2	8	10853	5027	2708	2930
H3	8	12213	5611	3094	3447
H4	8	30306	13967	6090	3940
H5	8	24485	11299	4920	3298
H6	8	16022	7368	3329	2589
H7	8	10024	4571	2552	3011
H8	8	10139	4681	2644	3174
H9	8	10399	4694	2412	2607
H10	8	549	3828	3573	4420
H11	8	525	4326	3803	4304
H12	8	602	4764	4096	4288
A1	9	9653	4502	2770	3541
A2	9	10239	4757	2934	3737
A3	9	12274	5616	3224	3813
A4	9	5150	2349	2095	3744
A5	9	5183	2380	2101	3718
A6	9	4952	2257	2038	3656
A7	9	9449	4250	2540	3248
A8	9	10957	4862	2678	3099
A9	9	12448	5554	2934	3219
A10	9	7891	3585	2354	3378
A11	9	6462	2930	1952	2872
A12	9	8183	3795	2440	3332
B1	9	7218	3275	2269	3325
B2	9	10141	4670	2794	3510
B3	9	11841	5384	3160	3816
B4	9	11734	5558	3770	5407
B5	9	24485	11265	5352	4500
B6	9	28585	12920	6038	4984
B7	9	2772	1389	2185	4927
B8	9	6473	3062	2457	4077
B9	9	5003	2331	2177	4027
B10	9	819	1995	2808	5273
B11	9	695	4016	3559	4218
B12	9	621	2612	3040	4905
C1	9	333	226	227	205
C2	9	429	265	248	235
C3	9	451	285	238	241
C4	9	407	231	195	200
C5	9	533	335	270	250
C6	9	351	195	171	195
C7	9	222	113	114	115
C8	9	360	236	206	201
C9	9	306	187	164	174
C10	9	329	214	174	195
C11	9	284	180	170	162
C12	9	423	274	235	229
D1	9	359	236	210	211
D2	9	189	94	142	120
D3	9	334	191	193	178
D4	9	403	240	210	226
D5	9	362	192	170	158
D6	9	394	220	202	204
D7	9	306	135	131	151
D8	9	326	217	200	196
D9	9	276	174	162	145
D10	9	322	209	168	178
D11	9	357	226	205	193
D12	9	419	251	225	225
E1	9	12307	5693	3285	3906
E2	9	13448	5992	3123	3252
E3	9	13177	5941	3112	3237
E4	9	5954	2685	2099	3455
E5	9	7701	3412	2033	2648
E6	9	8447	3737	2289	3032
E7	9	12400	5313	2627	2635
E8	9	13528	6089	3100	3139
E9	9	14331	6365	3159	3160
E10	9	8353	3728	2174	2779
E11	9	8291	3679	2112	2655
E12	9	7921	3601	2068	2607
F1	9	11177	5158	2887	3320
F2	9	11959	5431	2988	3322
F3	9	13030	5882	3114	3299
F4	9	26194	12014	5448	3973
F5	9	31170	14218	6297	4375
F6	9	29772	13430	5787	3897
F7	9	7554	3355	2230	3174
F8	9	8990	4149	2611	3584
F9	9	8320	3738	2284	3103
F10	9	610	2820	3131	4835
F11	9	443	3183	3130	4226
F12	9	568	4285	3865	4079
G1	9	13366	6231	3392	3687
G2	9	13837	6398	3355	3467
G3	9	15988	7280	3748	3773
G4	9	7162	3295	2331	3506
G5	9	7558	3481	2180	2941
G6	9	8139	3688	2216	2839
G7	9	13379	6166	3212	3341
G8	9	13201	5977	3037	3072
G9	9	13927	6244	3133	3168
G10	9	8511	3817	2168	2703
G11	9	7769	3506	1993	2521
G12	9	7880	3641	2102	2626
H1	9	10473	4858	2619	2879
H2	9	10885	5043	2727	2947
H3	9	12231	5640	3105	3469
H4	9	30432	14037	6123	3953
H5	9	24488	11297	4920	3290
H6	9	16066	7402	3359	2609
H7	9	10061	4616	2574	3026
H8	9	10161	4703	2657	3196
H9	9	10447	4731	2431	2617
H10	9	568	3872	3610	4477
H11	9	518	4361	3819	4310
H12	9	623	4790	4103	4279
A1	10	9692	4518	2771	3581
A2	10	10242	4762	2939	3741
A3	10	12285	5628	3253	3806
A4	10	5046	2299	2026	3652
A5	10	5178	2382	2104	3736
A6	10	4989	2265	2045	3668
A7	10	9465	4270	2550	3270
A8	10	10926	4853	2649	3075
A9	10	12478	5554	2941	3225
A10	10	7875	3587	2356	3379
A11	10	6477	2928	1943	2900
A12	10	8140	3782	2416	3315
B1	10	7236	3274	2274	3346
B2	10	10149	4687	2818	3499
B3	10	11840	5399	3164	3839
B4	10	11789	5563	3765	5373
B5	10	24368	11192	5323	4478
B6	10	28671	12969	6074	5019
B7	10	2791	1399	2195	4927
B8	10	6515	3086	2476	4109
B9	10	5017	2328	2178	4046
B10	10	814	1974	2812	5240
B11	10	711	4039	3594	4235
B12	10	620	2628	3072	4935
C1	10	346	244	218	211
C2	10	423	275	234	226
C3	10	443	301	249	244
C4	10	366	208	182	186
C5	10	581	350	280	262
C6	10	344	218	191	188
C7	10	232	133	124	132
C8	10	394	225	208	198
C9	10	302	193	178	174
C10	10	335	213	168	175
C11	10	300	201	180	175
C12	10	427	277	234	237
D1	10	382	239	205	216
D2	10	198	114	118	141
D3	10	350	198	196	185
D4	10	386	240	213	223
D5	10	375	200	168	152
D6	10	389	249	195	200
D7	10	293	138	134	141
D8	10	344	229	199	199
D9	10	290	162	148	138
D10	10	316	223	186	177
D11	10	368	245	210	215
D12	10	404	278	231	208
E1	10	12315	5682	3275	3904
E2	10	13339	5951	3093	3215
E3	10	13170	5938	3108	3223
E4	10	5982	2727	2143	3529
E5	10	7599	3347	2007	2600
E6	10	8433	3740	2266	3031
E7	10	12376	5282	2621	2620
E8	10	13564	6112	3101	3141
E9	10	14364	6400	3182	3173
E10	10	8293	3699	2150	2759
E11	10	8299	3695	2125	2652
E12	10	7878	3592	2064	2606
F1	10	11156	5132	2892	3307
F2	10	11911	5408	2959	3292
F3	10	13011	5869	3108	3277
F4	10	26764	12337	5595	4109
F5	10	30751	13990	6145	4294
F6	10	29952	13517	5830	3933
F7	10	7551	3366	2249	3179
F8	10	8998	4131	2603	3569
F9	10	8331	3724	2280	3108
F10	10	598	2801	3115	4798
F11	10	444	3211	3158	4254
F12	10	565	4296	3849	4070
G1	10	13324	6192	3387	3703
G2	10	13845	6415	3368	3481
G3	10	15982	7287	3760	3780
G4	10	7157	3275	2314	3468
G5	10	7648	3526	2225	2996
G6	10	8104	3666	2199	2830
G7	10	13392	6174	3205	3327
G8	10	13262	6002	3038	3098
G9	10	13937	6233	3134	3164
G10	10	8490	3800	2154	2698
G11	10	7745	3490	1989	2506
G12	10	7897	3659	2083	2643
H1	10	10449	4838	2627	2858
H2	10	10850	5030	2712	2936
H3	10	12177	5617	3088	3455
H4	10	30658	14149	6190	3999
H5	10	24334	11199	4892	3278
H6	10	16128	7424	3361	2621
H7	10	10074	4604	2572	3034
H8	10	10169	4694	2646	3185
H9	10	10470	4743	2425	2625
H10	10	579	3897	3631	4488
H11	10	513	4394	3848	4338
H12	10	619	4787	4118	4287
A1	11	9683	4510	2775	3543
A2	11	10306	4762	2939	3738
A3	11	12262	5615	3238	3802
A4	11	5077	2301	2035	3682
A5	11	5187	2370	2106	3725
A6	11	4982	2280	2048	3678
A7	11	9534	4302	2548	3293
A8	11	10999	4880	2684	3101
A9	11	12552	5597	2966	3245
A10	11	7895	3592	2352	3372
A11	11	6457	2914	1953	2889
A12	11	8176	3805	2441	3336
B1	11	7275	3291	2286	3366
B2	11	10139	4670	2798	3491
B3	11	11877	5395	3174	3825
B4	11	11823	5571	3774	5391
B5	11	24340	11164	5310	4445
B6	11	28744	12995	6067	5014
B7	11	2781	1395	2185	4941
B8	11	6473	3065	2463	4092
B9	11	4984	2315	2157	4009
B10	11	838	1997	2831	5300
B11	11	698	4053	3586	4236
B12	11	627	2647	3074	4947
C1	11	341	239	231	225
C2	11	443	281	258	239
C3	11	437	295	252	242
C4	11	383	214	190	191
C5	11	591	368	294	282
C6	11	351	212	183	180
C7	11	235	147	151	158
C8	11	379	235	201	194
C9	11	330	191	179	183
C10	11	340	212	172	183
C11	11	303	200	186	160
C12	11	424	272	235	238
D1	11	350	227	202	195
D2	11	211	126	128	136
D3	11	347	213	198	198
D4	11	398	248	221	219
D5	11	389	230	166	164
D6	11	394	247	194	210
D7	11	320	155	153	145
D8	11	364	221	203	193
D9	11	299	178	149	148
D10	11	342	205	185	179
D11	11	389	223	201	217
D12	11	408	258	225	215
E1	11	12311	5695	3289	3903
E2	11	13332	5936	3089	3226
E3	11	13280	5979	3135	3260
E4	11	5982	2716	2148	3535
E5	11	7618	3369	2002	2608
E6	11	8508	3766	2320	3060
E7	11	12350	5310	2622	2638
E8	11	13588	6121	3128	3152
E9	11	14390	6414	3174	3174
E10	11	8347	3730	2170	2786
E11	11	8351	3726	2139	2674
E12	11	7963	3622	2074	2606
F1	11	11172	5149	2896	3315
F2	11	11923	5413	2960	3302
F3	11	13152	5941	3158	3338
F4	11	26832	12353	5623	4135
F5	11	30854	14037	6197	4299
F6	11	30002	13526	5844	3934
F7	11	7546	3345	2210	3156
F8	11	9018	4153	2625	3583
F9	11	8344	3731	2285	3105
F10	11	621	2844	3148	4837
F11	11	446	3239	3161	4276
F12	11	551	4326	3873	4091
G1	11	13351	6210	3392	3695
G2	11	13864	6415	3373	3483
G3	11	15938	7262	3737	3744
G4	11	7167	3286	2321	3477
G5	11	7602	3528	2227	3010
G6	11	8090	3652	2202	2835
G7	11	13482	6216	3228	3363
G8	11	13221	5981	3031	3062
G9	11	13942	6240	3141	3151
G10	11	8513	3800	2167	2707
G11	11	7740	3488	1971	2507
G12	11	7946	3662	2100	2658
H1	11	10437	4846	2614	2855
H2	11	10860	5028	2711	2946
H3	11	12308	5676	3144	3507
H4	11	30738	14195	6200	4011
H5	11	24406	11247	4895	3290
H6	11	16204	7461	3391	2651
H7	11	10079	4601	2562	3018
H8	11	10216	4719	2659	3214
H9	11	10490	4760	2445	2637
H10	11	575	3909	3647	4517
H11	11	541	4431	3881	4363
H12	11	613	4809	4108	4282
A1	12	9718	4529	2765	3564
A2	12	10317	4798	2948	3763
A3	12	12313	5637	3241	3813
A4	12	5113	2315	2064	3701
A5	12	5218	2396	2111	3745
A6	12	5013	2281	2061	3694
A7	12	9488	4279	2558	3270
A8	12	11008	4907	2678	3110
A9	12	12572	5610	2967	3247
A10	12	7911	3603	2361	3403
A11	12	6484	2924	1949	2882
A12	12	8199	3802	2427	3339
B1	12	7269	3293	2297	3353
B2	12	10109	4653	2799	3502
B3	12	11913	5424	3178	3840
B4	12	11860	5591	3798	5404
B5	12	24469	11249	5346	4499
B6	12	28780	13011	6079	5033
B7	12	2806	1389	2205	4992
B8	12	6488	3078	2471	4098
B9	12	5021	2329	2167	4040
B10	12	830	2010	2822	5280
B11	12	723	4098	3605	4257
B12	12	640	2663	3089	4979
C1	12	353	244	241	228
C2	12	464	290	263	238
C3	12	463	292	259	241
C4	12	402	222	207	191
C5	12	588	366	307	284
C6	12	373	241	193	191
C7	12	238	138	134	133
C8	12	397	249	217	199
C9	12	316	201	179	178
C10	12	347	209	177	192
C11	12	316	204	192	175
C12	12	444	281	217	240
D1	12	364	242	215	210
D2	12	238	142	145	166
D3	12	344	227	186	187
D4	12	400	251	223	224
D5	12	379	199	178	163
D6	12	405	249	212	211
D7	12	327	153	150	150
D8	12	376	238	200	203
D9	12	301	165	155	152
D10	12	346	217	175	174
D11	12	381	257	214	207
D12	12	414	264	237	221
E1	12	12374	5708	3290	3907
E2	12	13341	5955	3091	3233
E3	12	13257	5993	3133	3275
E4	12	6000	2711	2167	3536
E5	12	7669	3374	2027	2640
E6	12	8500	3783	2309	3061
E7	12	12395	5308	2634	2643
E8	12	13610	6134	3130	3173
E9	12	14340	6386	3169	3164
E10	12	8308	3705	2162	2772
E11	12	8344	3728	2129	2671
E12	12	7960	3621	2080	2602
F1	12	11201	5147	2874	3330
F2	12	11925	5403	2985	3320
F3	12	13142	5930	3145	3323
F4	12	26810	12347	5615	4106
F5	12	30929	14071	6200	4298
F6	12	30114	13585	5850	3940
F7	12	7582	3375	2236	3179
F8	12	9052	4173	2642	3604
F9	12	8330	3751	2292	3098
F10	12	595	2833	3137	4812
F11	12	446	3260	3157	4268
F12	12	585	4348	3880	4117
G1	12	13332	6210	3407	3692
G2	12	13890	6435	3390	3495
G3	12	15960	7280	3749	3772
G4	12	7141	3289	2330	3497
G5	12	7595	3516	2219	3015
G6	12	8095	3663	2209	2867
G7	12	13475	6193	3232	3349
G8	12	13314	6021	3044	3092
G9	12	13979	6262	3138	3161
G10	12	8516	3820	2177	2713
G11	12	7762	3508	1997	2534
G12	12	7951	3675	2104	2673
H1	12	10484	4852	2641	2886
H2	12	10863	5031	2713	2946
H3	12	12333	5691	3154	3515
H4	12	30801	14209	6220	4023
H5	12	24484	11278	4914	3290
H6	12	16238	7463	3395	2647
H7	12	10098	4624	2565	3055
H8	12	10226	4713	2671	3211
H9	12	10505	4746	2444	2638
H10	12	587	3953	3679	4534
H11	12	560	4447	3897	4355
H12	12	624	4824	4139	4295
A1	13	9689	4529	2771	3571
A2	13	10322	4787	2953	3771
A3	13	12342	5654	3267	3839
A4	13	5117	2325	2057	3690
A5	13	5214	2395	2114	3754
A6	13	5011	2272	2057	3676
A7	13	9490	4280	2572	3269
A8	13	10979	4888	2680	3117
A9	13	12601	5621	2995	3257
A10	13	7896	3602	2361	3379
A11	13	6441	2895	1931	2884
A12	13	8216	3796	2447	3335
B1	13	7273	3280	2279	3343
B2	13	10155	4689	2809	3527
B3	13	11943	5429	3196	3848
B4	13	11869	5598	3795	5407
B5	13	24628	11327	5394	4544
B6	13	28840	13040	6096	5031
B7	13	2815	1400	2206	4994
B8	13	6537	3074	2496	4112
B9	13	5050	2338	2188	4049
B10	13	834	2000	2840	5290
B11	13	730	4116	3662	4297
B12	13	649	2677	3099	4969
C1	13	356	240	233	224
C2	13	450	302	260	240
C3	13	463	302	269	247
C4	13	403	239	198	185
C5	13	592	360	275	281
C6	13	389	225	204	197
C7	13	254	139	121	142
C8	13	404	268	220	218
C9	13	328	203	192	185
C10	13	367	239	201	197
C11	13	307	186	172	175
C12	13	438	283	235	234
D1	13	344	227	206	205
D2	13	261	150	150	157
D3	13	369	223	202	205
D4	13	399	253	224	218
D5	13	387	199	163	179
D6	13	416	262	222	212
D7	13	325	154	132	143
D8	13	396	234	199	207
D9	13	300	159	156	164
D10	13	371	226	197	193
D11	13	376	247	219	225
D12	13	432	271	249	211
E1	13	12393	5718	3311	3931
E2	13	13340	5937	3085	3226
E3	13	13277	5995	3144	3257
E4	13	6005	2733	2162	3563
E5	13	7676	3413	2040	2640
E6	13	8503	3787	2315	3066
E7	13	12383	5287	2619	2629
E8	13	13617	6130	3115	3153
E9	13	14313	6359	3169	3152
E10	13	8327	3724	2155	2772
E11	13	8303	3702	2125	2663
E12	13	7947	3627	2078	2605
F1	13	11247	5180	2916	3344
F2	13	11948	5416	2978	3325
F3	13	13057	5899	3131	3288
F4	13	26792	12314	5607	4100
F5	13	31113	14163	6248	4325
F6	13	30178	13598	5872	3952
F7	13	7595	3376	2251	3198
F8	13	9070	4177	2653	3623
F9	13	8345	3737	2279	3115
F10	13	608	2855	3119	4809
F11	13	453	3250	3168	4278
F12	13	581	4367	3908	4124
G1	13	13369	6226	3391	3704
G2	13	13894	6424	3383	3503
G3	13	15953	7265	3750	3794
G4	13	7099	3250	2309	3488
G5	13	7536	3489	2190	2987
G6	13	8068	3652	2213	2863
G7	13	13532	6231	3263	3382
G8	13	13402	6069	3074	3128
G9	13	14034	6278	3160	3187
G10	13	8552	3835	2175	2721
G11	13	7796	3525	2007	2547
G12	13	7954	3664	2107	2659
H1	13	10435	4832	2627	2868
H2	13	10862	5024	2716	2941
H3	13	12291	5661	3131	3486
H4	13	30921	14276	6235	4033
H5	13	24609	11350	4946	3313
H6	13	16273	7501	3405	2659
H7	13	10089	4623	2579	3040
H8	13	10228	4717	2680	3201
H9	13	10541	4767	2457	2645
H10	13	596	3967	3691	4543
H11	13	547	4471	3895	4369
H12	13	630	4850	4157	4337
A1	14	9722	4533	2776	3575
A2	14	10348	4776	2951	3764
A3	14	12370	5657	3285	3851
A4	14	5124	2317	2073	3719
A5	14	5232	2383	2115	3752
A6	14	5030	2296	2064	3708
A7	14	9527	4302	2570	3290
A8	14	11015	4871	2683	3122
A9	14	12585	5622	2972	3250
A10	14	7903	3600	2365	3393
A11	14	6456	2908	1943	2866
A12	14	8214	3802	2447	3357
B1	14	7224	3272	2273	3344
B2	14	10197	4704	2806	3529
B3	14	11935	5429	3201	3841
B4	14	11894	5620	3796	5411
B5	14	24833	11437	5436	4587
B6	14	28736	13000	6079	5017
B7	14	2830	1404	2215	4995
B8	14	6509	3097	2493	4121
B9	14	5062	2351	2196	4054
B10	14	832	1996	2850	5294
B11	14	705	4093	3615	4246
B12	14	634	2668	3106	4950
C1	14	356	238	243	229
C2	14	461	287	254	238
C3	14	468	296	251	234
C4	14	396	227	203	191
C5	14	601	348	298	270
C6	14	386	224	196	202
C7	14	268	127	142	135
C8	14	416	268	215	218
C9	14	338	189	181	191
C10	14	374	245	193	196
C11	14	315	201	182	179
C12	14	445	280	241	236
D1	14	373	249	217	207
D2	14	260	147	159	142
D3	14	362	222	200	185
D4	14	406	260	224	218
D5	14	364	203	163	163
D6	14	422	267	209	221
D7	14	333	163	147	148
D8	14	389	236	202	215
D9	14	309	183	170	156
D10	14	360	216	188	192
D11	14	392	246	209	217
D12	14	423	262	236	211
E1	14	12393	5741	3307	3937
E2	14	13372	5946	3094	3233
E3	14	13292	5983	3134	3266
E4	14	6006	2724	2148	3551
E5	14	7697	3412	2043	2672
E6	14	8493	3770	2311	3063
E7	14	12424	5325	2642	2654
E8	14	13655	6139	3134	3165
E9	14	14288	6330	3144	3130
E10	14	8389	3744	2190	2785
E11	14	8280	3671	2090	2629
E12	14	7956	3621	2083	2606
F1	14	11272	5203	2918	3345
F2	14	11948	5424	2986	3326
F3	14	13049	5888	3104	3286
F4	14	26745	12313	5579	4089
F5	14	31288	14268	6308	4375
F6	14	30221	13628	5878	3969
F7	14	7622	3401	2250	3198
F8	14	9090	4192	2640	3630
F9	14	8352	3728	2294	3114
F10	14	605	2866	3151	4857
F11	14	445	3264	3159	4262
F12	14	590	4408	3928	4128
G1	14	13459	6269	3422	3748
G2	14	13967	6460	3411	3529
G3	14	15958	7265	3760	3783
G4	14	7115	3257	2325	3501
G5	14	7447	3438	2172	2955
G6	14	8033	3643	2209	2861
G7	14	13544	6229	3245	3370
G8	14	13378	6064	3065	3117
G9	14	14085	6315	3175	3211
G10	14	8588	3847	2190	2720
G11	14	7827	3533	1998	2557
G12	14	7953	3683	2116	2665
H1	14	10408	4814	2607	2848
H2	14	10864	5018	2722	2941
H3	14	12295	5663	3122	3493
H4	14	30988	14312	6253	4058
H5	14	24734	11410	4984	3334
H6	14	16286	7496	3404	2660
H7	14	10095	4614	2575	3037
H8	14	10249	4738	2681	3220
H9	14	10554	4765	2452	2657
H10	14	584	3972	3687	4529
H11	14	549	4466	3909	4397
H12	14	626	4860	4166	4315
A1	15	9751	4544	2800	3605
A2	15	10343	4794	2964	3768
A3	15	12338	5641	3257	3831
A4	15	5157	2343	2098	3745
A5	15	5242	2415	2117	3769
A6	15	5018	2277	2066	3693
A7	15	9506	4294	2551	3270
A8	15	11031	4905	2677	3129
A9	15	12590	5599	2970	3220
A10	15	7921	3593	2357	3381
A11	15	6469	2914	1941	2876
A12	15	8192	3785	2425	3341
B1	15	7197	3262	2257	3334
B2	15	10192	4692	2815	3526
B3	15	11890	5429	3176	3826
B4	15	11898	5625	3807	5447
B5	15	24837	11425	5433	4561
B6	15	28854	13035	6091	5032
B7	15	2831	1409	2217	5009
B8	15	6562	3108	2473	4133
B9	15	5062	2340	2198	4062
B10	15	843	2010	2836	5296
B11	15	709	4117	3631	4291
B12	15	643	2689	3107	4974
C1	15	387	262	255	254
C2	15	498	310	261	257
C3	15	474	303	253	252
C4	15	421	245	226	209
C5	15	587	364	302	273
C6	15	383	242	209	205
C7	15	264	139	125	126
C8	15	428	251	224	210
C9	15	340	210	197	192
C10	15	392	232	207	196
C11	15	311	204	171	167
C12	15	451	287	233	239
D1	15	389	240	221	217
D2	15	293	170	158	161
D3	15	382	225	217	185
D4	15	418	252	218	224
D5	15	392	198	171	186
D6	15	432	280	226	204
D7	15	357	161	160	151
D8	15	400	253	216	206
D9	15	330	205	166	161
D10	15	375	226	207	194
D11	15	377	241	206	205
D12	15	431	261	227	220
E1	15	12458	5741	3311	3943
E2	15	13402	5957	3102	3239
E3	15	13314	6017	3145	3292
E4	15	5996	2719	2143	3542
E5	15	7738	3432	2054	2682
E6	15	8509	3776	2321	3065
E7	15	12499	5342	2650	2658
E8	15	13681	6150	3134	3173
E9	15	14374	6396	3178	3151
E10	15	8387	3736	2169	2783
E11	15	8286	3670	2091	2631
E12	15	7971	3633	2081	2619
F1	15	11322	5240	2932	3356
F2	15	11974	5442	2983	3318
F3	15	13091	5907	3130	3298
F4	15	26571	12218	5551	4045
F5	15	31244	14235	6276	4356
F6	15	30237	13639	5891	3964
F7	15	7670	3417	2268	3210
F8	15	9101	4201	2660	3627
F9	15	8390	3757	2302	3115
F10	15	617	2880	3142	4837
F11	15	449	3272	3171	4233
F12	15	587	4393	3917	4132
G1	15	13435	6255	3414	3729
G2	15	13984	6473	3421	3533
G3	15	15945	7278	3746	3786
G4	15	7085	3268	2320	3512
G5	15	7473	3465	2189	2974
G6	15	8026	3643	2204	2861
G7	15	13483	6212	3229	3344
G8	15	13398	6066	3075	3111
G9	15	14073	6303	3166	3210
G10	15	8587	3850	2179	2736
G11	15	7849	3546	2014	2554
G12	15	7967	3685	2118	2661
H1	15	10431	4823	2616	2876
H2	15	10891	5052	2724	2958
H3	15	12342	5693	3137	3522
H4	15	30986	14301	6243	4024
H5	15	24732	11403	4968	3331
H6	15	16321	7513	3403	2653
H7	15	10146	4629	2591	3066
H8	15	10277	4750	2685	3226
H9	15	10556	4773	2452	2643
H10	15	596	3974	3704	4534
H11	15	548	4478	3918	4378
H12	15	622	4856	4154	4323
A1	16	9742	4531	2787	3582
A2	16	10375	4820	2967	3777
A3	16	12337	5639	3259	3839
A4	16	5136	2335	2088	3706
A5	16	5237	2394	2114	3757
A6	16	5007	2277	2062	3694
A7	16	9508	4274	2546	3279
A8	16	11045	4909	2697	3108
A9	16	12568	5598	2960	3234
A10	16	7963	3618	2378	3399
A11	16	6499	2915	1941	2879
A12	16	8182	3794	2428	3321
B1	16	7248	3289	2273	3360
B2	16	10209	4705	2823	3532
B3	16	11906	5425	3200	3837
B4	16	11868	5601	3776	5395
B5	16	24705	11343	5393	4537
B6	16	28911	13073	6115	5041
B7	16	2823	1409	2219	4995
B8	16	6565	3115	2496	4135
B9	16	5097	2358	2221	4100
B10	16	835	2029	2853	5315
B11	16	707	4093	3603	4249
B12	16	642	2695	3117	4978
C1	16	404	276	263	236
C2	16	500	327	279	252
C3	16	462	303	265	250
C4	16	385	234	201	208
C5	16	617	377	293	296
C6	16	385	237	213	207
C7	16	265	132	143	162
C8	16	418	268	227	208
C9	16	350	220	196	185
C10	16	374	248	198	186
C11	16	312	199	172	163
C12	16	450	306	245	243
D1	16	371	248	244	232
D2	16	304	197	172	181
D3	16	387	223	210	185
D4	16	418	249	227	216
D5	16	372	189	179	158
D6	16	434	269	216	225
D7	16	343	163	153	141
D8	16	389	244	186	218
D9	16	333	196	172	159
D10	16	391	232	203	188
D11	16	390	255	204	212
D12	16	436	258	233	231
E1	16	12520	5790	3344	3956
E2	16	13439	5987	3109	3259
E3	16	13311	6011	3130	3280
E4	16	6014	2725	2149	3545
E5	16	7669	3383	2033	2652
E6	16	8503	3773	2305	3040
E7	16	12462	5321	2637	2646
E8	16	13701	6179	3145	3192
E9	16	14429	6418	3184	3182
E10	16	8431	3766	2185	2801
E11	16	8329	3711	2121	2645
E12	16	7944	3606	2075	2612
F1	16	11369	5251	2951	3374
F2	16	11998	5446	2980	3347
F3	16	13115	5926	3133	3294
F4	16	26734	12305	5587	4102
F5	16	31191	14217	6275	4356
F6	16	30295	13658	5890	3961
F7	16	7652	3405	2264	3215
F8	16	9117	4191	2667	3642
F9	16	8419	3792	2313	3152
F10	16	628	2898	3176	4860
F11	16	482	3297	3196	4286
F12	16	583	4370	3902	4120
G1	16	13381	6214	3392	3691
G2	16	13933	6445	3406	3518
G3	16	15969	7272	3759	3792
G4	16	7099	3252	2315	3506
G5	16	7480	3478	2198	2992
G6	16	8065	3662	2209	2880
G7	16	13490	6217	3242	3365
G8	16	13388	6049	3077	3121
G9	16	14056	6290	3166	3206
G10	16	8625	3865	2197	2758
G11	16	7875	3540	2005	2563
G12	16	7983	3686	2115	2679
H1	16	10454	4841	2628	2897
H2	16	10930	5051	2725	2974
H3	16	12345	5693	3146	3530
H4	16	31026	14321	6273	4050
H5	16	24740	11407	4987	3343
H6	16	16310	7509	3406	2672
H7	16	10146	4632	2585	3082
H8	16	10283	4746	2693	3229
H9	16	10591	4799	2473	2665
H10	16	598	4012	3706	4572
H11	16	576	4509	3935	4373
H12	16	638	4898	4182	4342
A1	17	9766	4555	2802	3607
A2	17	10376	4817	2973	3787
A3	17	12338	5646	3253	3845
A4	17	5146	2315	2085	3717
A5	17	5249	2399	2134	3772
A6	17	5037	2285	2079	3717
A7	17	9573	4310	2564	3299
A8	17	11073	4926	2704	3124
A9	17	12629	5633	2982	3254
A10	17	7948	3608	2378	3407
A11	17	6503	2911	1960	2904
A12	17	8202	3802	2446	3347
B1	17	7227	3268	2266	3355
B2	17	10245	4734	2839	3555
B3	17	11961	5439	3197	3870
B4	17	11903	5625	3794	5415
B5	17	24818	11398	5427	4556
B6	17	28868	13051	6094	5035
B7	17	2843	1414	2218	4985
B8	17	6579	3113	2499	4136
B9	17	5085	2364	2187	4047
B10	17	830	2028	2851	5303
B11	17	703	4116	3641	4259
B12	17	640	2695	3105	4969
C1	17	404	279	261	242
C2	17	502	321	271	261
C3	17	462	305	265	243
C4	17	419	229	201	196
C5	17	610	361	286	264
C6	17	387	229	203	200
C7	17	277	136	145	138
C8	17	435	260	222	214
C9	17	353	232	201	207
C10	17	385	243	206	194
C11	17	337	213	202	161
C12	17	450	272	226	237
D1	17	391	241	212	226
D2	17	323	201	172	178
D3	17	370	207	192	200
D4	17	402	255	221	214
D5	17	385	209	167	170
D6	17	444	263	228	214
D7	17	336	171	156	146
D8	17	396	252	205	211
D9	17	327	189	163	172
D10	17	398	232	204	194
D11	17	399	235	215	213
D12	17	423	245	226	216
E1	17	12487	5763	3328	3960
E2	17	13463	6017	3123	3273
E3	17	13269	5976	3133	3262
E4	17	6001	2726	2149	3522
E5	17	7679	3405	2044	2667
E6	17	8466	3748	2292	3055
E7	17	12418	5308	2643	2624
E8	17	13702	6155	3147	3182
E9	17	14423	6425	3203	3188
E10	17	8453	3771	2190	2805
E11	17	8392	3735	2141	2647
E12	17	7922	3598	2063	2574
F1	17	11357	5241	2919	3373
F2	17	12065	5479	3014	3351
F3	17	13169	5933	3142	3319
F4	17	26645	12246	5557	4063
F5	17	31323	14273	6294	4364
F6	17	30283	13641	5888	3955
F7	17	7613	3384	2248	3178
F8	17	9132	4215	2663	3636
F9	17	8388	3775	2306	3133
F10	17	620	2918	3195	4894
F11	17	463	3310	3196	4281
F12	17	566	4384	3903	4106
G1	17	13382	6218	3396	3710
G2	17	13924	6451	3396	3524
G3	17	15998	7286	3760	3794
G4	17	7080	3239	2321	3503
G5	17	7466	3470	2195	2998
G6	17	8035	3651	2210	2883
G7	17	13559	6250	3263	3387
G8	17	13360	6053	3072	3117
G9	17	14007	6278	3150	3189
G10	17	8597	3853	2186	2731
G11	17	7817	3526	2024	2537
G12	17	7963	3677	2108	2666
H1	17	10427	4830	2632	2875
H2	17	10958	5070	2727	2977
H3	17	12343	5689	3158	3533
H4	17	31044	14338	6257	4052
H5	17	24819	11448	4992	3348
H6	17	16342	7528	3417	2657
H7	17	10154	4628	2590	3071
H8	17	10313	4764	2704	3245
H9	17	10565	4777	2458	2637
H10	17	607	4025	3712	4585
H11	17	560	4529	3924	4416
H12	17	632	4905	4187	4323
A1	18	9709	4529	2790	3569
A2	18	10373	4830	2959	3789
A3	18	12365	5663	3262	3831
A4	18	5140	2337	2073	3708
A5	18	5241	2416	2128	3762
A6	18	5045	2289	2079	3722
A7	18	9659	4353	2597	3339
A8	18	11152	4941	2706	3156
A9	18	12602	5615	2978	3249
A10	18	7964	3623	2376	3417
A11	18	6502	2905	1944	2899
A12	18	8208	3818	2448	3366
B1	18	7305	3303	2290	3372
B2	18	10279	4728	2839	3544
B3	18	11957	5456	3199	3858
B4	18	11940	5635	3801	5412
B5	18	24837	11409	5425	4567
B6	18	28946	13073	6109	5035
B7	18	2845	1397	2210	4980
B8	18	6540	3094	2469	4115
B9	18	5109	2367	2204	4077
B10	18	829	2024	2845	5296
B11	18	709	4136	3655	4268
B12	18	625	2688	3104	4951
C1	18	386	262	261	251
C2	18	503	328	272	261
C3	18	502	315	269	257
C4	18	415	228	214	197
C5	18	619	375	304	270
C6	18	399	248	200	208
C7	18	309	182	154	161
C8	18	423	260	235	215
C9	18	364	215	193	196
C10	18	378	244	200	192
C11	18	334	205	194	170
C12	18	438	282	245	244
D1	18	358	231	225	221
D2	18	313	182	175	175
D3	18	366	235	196	178
D4	18	418	259	216	226
D5	18	388	219	177	171
D6	18	450	265	218	213
D7	18	358	181	145	150
D8	18	385	247	214	202
D9	18	326	180	178	172
D10	18	388	242	196	197
D11	18	408	244	210	219
D12	18	416	267	225	217
E1	18	12484	5783	3344	3959
E2	18	13443	6007	3122	3244
E3	18	13274	5994	3129	3277
E4	18	6006	2735	2155	3561
E5	18	7667	3392	2031	2647
E6	18	8537	3796	2328	3074
E7	18	12399	5315	2646	2647
E8	18	13645	6128	3136	3166
E9	18	14341	6394	3171	3164
E10	18	8430	3769	2190	2794
E11	18	8427	3757	2143	2685
E12	18	7952	3607	2065	2603
F1	18	11330	5216	2917	3355
F2	18	12100	5485	3015	3371
F3	18	13135	5937	3132	3300
F4	18	26685	12299	5583	4084
F5	18	31318	14254	6288	4369
F6	18	30339	13679	5889	3964
F7	18	7600	3366	2218	3158
F8	18	9101	4184	2644	3627
F9	18	8391	3762	2293	3116
F10	18	626	2937	3213	4874
F11	18	458	3318	3211	4302
F12	18	563	4389	3903	4103
G1	18	13331	6202	3389	3696
G2	18	13950	6450	3388	3523
G3	18	16021	7326	3795	3839
G4	18	7066	3253	2322	3513
G5	18	7485	3466	2201	3015
G6	18	8015	3650	2235	2881
G7	18	13613	6270	3268	3397
G8	18	13362	6030	3054	3110
G9	18	14071	6320	3170	3196
G10	18	8624	3876	2208	2747
G11	18	7838	3520	2015	2547
G12	18	7939	3672	2102	2665
H1	18	10460	4860	2638	2885
H2	18	10935	5068	2731	2971
H3	18	12277	5646	3136	3484
H4	18	31060	14323	6246	4046
H5	18	24772	11423	4987	3330
H6	18	16373	7543	3418	2665
H7	18	10145	4621	2568	3042
H8	18	10329	4787	2718	3263
H9	18	10593	4789	2476	2657
H10	18	609	4048	3732	4582
H11	18	576	4540	3959	4429
H12	18	663	4944	4213	4353
A1	19	9773	4557	2793	3609
A2	19	10405	4833	2965	3776
A3	19	12390	5667	3255	3849
A4	19	5255	2389	2126	3826
A5	19	5255	2418	2121	3758
A6	19	5056	2295	2089	3730
A7	19	9608	4329	2592	3299
A8	19	11117	4946	2714	3139
A9	19	12657	5635	2985	3259
A10	19	7996	3622	2376	3405
A11	19	6501	2914	1958	2889
A12	19	8227	3809	2449	3353
B1	19	7319	3294	2301	3381
B2	19	10239	4709	2827	3528
B3	19	11981	5468	3209	3867
B4	19	11988	5663	3840	5469
B5	19	24900	11434	5455	4579
B6	19	28985	13087	6124	5044
B7	19	2870	1416	2229	4988
B8	19	6568	3118	2485	4137
B9	19	5114	2361	2212	4084
B10	19	850	2066	2878	5339
B11	19	722	4145	3673	4295
B12	19	629	2710	3114	4966
C1	19	401	293	252	252
C2	19	495	309	271	256
C3	19	501	326	275	272
C4	19	492	278	235	222
C5	19	627	377	305	279
C6	19	401	262	220	207
C7	19	289	152	150	152
C8	19	423	278	231	208
C9	19	358	228	196	195
C10	19	386	237	198	198
C11	19	321	203	183	174
C12	19	464	286	234	231
D1	19	386	239	212	213
D2	19	324	198	175	172
D3	19	388	242	212	187
D4	19	442	267	223	231
D5	19	386	179	177	163
D6	19	432	268	216	211
D7	19	360	165	155	156
D8	19	377	243	217	203
D9	19	339	193	173	168
D10	19	386	242	218	186
D11	19	392	275	225	225
D12	19	418	260	231	218
E1	19	12465	5747	3318	3949
E2	19	13418	5982	3130	3250
E3	19	13309	6011	3152	3284
E4	19	6035	2730	2124	3496
E5	19	7710	3417	2066	2671
E6	19	8587	3806	2325	3092
E7	19	12435	5313	2617	2631
E8	19	13666	6154	3129	3175
E9	19	14379	6388	3177	3171
E10	19	8527	3825	2208	2829
E11	19	8432	3757	2147	2671
E12	19	7948	3616	2054	2581
F1	19	11308	5212	2929	3357
F2	19	12008	5454	2981	3320
F3	19	13196	5962	3150	3324
F4	19	26314	12064	5464	3978
F5	19	31474	14344	6314	4376
F6	19	30458	13728	5918	3985
F7	19	7672	3405	2255	3193
F8	19	9145	4206	2653	3629
F9	19	8415	3774	2298	3136
F10	19	642	2972	3227	4903
F11	19	467	3357	3220	4300
F12	19	568	4389	3906	4084
G1	19	13414	6244	3407	3723
G2	19	13947	6460	3404	3523
G3	19	16023	7308	3778	3809
G4	19	7118	3262	2356	3577
G5	19	7449	3444	2180	2977
G6	19	8016	3641	2206	2871
G7	19	13598	6265	3280	3388
G8	19	13381	6046	3052	3114
G9	19	14106	6328	3169	3216
G10	19	8621	3854	2191	2745
G11	19	7848	3525	2013	2542
G12	19	7942	3669	2099	2644
H1	19	10413	4826	2607	2882
H2	19	10866	5029	2716	2953
H3	19	12330	5682	3139	3529
H4	19	30794	14192	6191	4006
H5	19	24861	11454	4984	3351
H6	19	16426	7563	3443	2673
H7	19	10170	4655	2593	3059
H8	19	10341	4778	2706	3245
H9	19	10599	4800	2476	2667
H10	19	611	4057	3748	4595
H11	19	568	4563	3971	4425
H12	19	657	4953	4238	4373
A1	20	9783	4571	2804	3605
A2	20	10421	4841	2968	3789
A3	20	12406	5664	3281	3864
A4	20	5295	2412	2161	3847
A5	20	5269	2403	2128	3763
A6	20	5059	2292	2071	3723
A7	20	9501	4285	2538	3273
A8	20	11067	4932	2695	3132
A9	20	12679	5654	2990	3256
A10	20	8011	3638	2377	3416
A11	20	6508	2914	1947	2886
A12	20	8247	3813	2438	3353
B1	20	7314	3313	2304	3394
B2	20	10253	4727	2834	3530
B3	20	12009	5467	3219	3873
B4	20	12042	5694	3837	5479
B5	20	24999	11483	5465	4585
B6	20	29001	13115	6129	5033
B7	20	2857	1421	2224	5006
B8	20	6606	3118	2511	4138
B9	20	5124	2378	2213	4088
B10	20	817	2076	2898	5335
B11	20	721	4201	3696	4311
B12	20	646	2732	3111	4972
C1	20	398	282	266	249
C2	20	512	340	279	255
C3	20	503	323	274	258
C4	20	490	280	246	237
C5	20	613	377	280	288
C6	20	404	232	204	214
C7	20	282	146	130	145
C8	20	435	279	239	216
C9	20	366	220	204	195
C10	20	369	242	195	200
C11	20	330	213	191	187
C12	20	457	284	246	239
D1	20	366	251	230	216
D2	20	332	197	182	175
D3	20	380	218	193	189
D4	20	461	268	236	223
D5	20	390	199	178	165
D6	20	428	259	226	226
D7	20	347	157	137	152
D8	20	392	254	201	202
D9	20	345	198	163	166
D10	20	383	248	207	199
D11	20	394	251	228	230
D12	20	422	264	224	225
E1	20	12511	5776	3325	3960
E2	20	13469	6004	3132	3255
E3	20	13362	6038	3153	3280
E4	20	6115	2756	2135	3490
E5	20	7785	3452	2070	2689
E6	20	8596	3811	2328	3069
E7	20	12470	5313	2646	2614
E8	20	13649	6141	3133	3166
E9	20	14397	6399	3185	3162
E10	20	8541	3816	2202	2812
E11	20	8426	3750	2138	2654
E12	20	7971	3620	2076	2594
F1	20	11380	5241	2928	3359
F2	20	12080	5477	2994	3320
F3	20	13268	5991	3147	3319
F4	20	26369	12061	5446	3954
F5	20	31756	14484	6371	4420
F6	20	30375	13683	5904	3965
F7	20	7774	3469	2280	3236
F8	20	9128	4209	2659	3637
F9	20	8421	3781	2305	3126
F10	20	628	3009	3237	4920
F11	20	471	3365	3246	4313
F12	20	573	4436	3934	4133
G1	20	13393	6222	3391	3725
G2	20	13913	6427	3400	3525
G3	20	15996	7297	3758	3809
G4	20	7086	3254	2352	3593
G5	20	7409	3414	2191	2960
G6	20	7968	3605	2208	2876
G7	20	13549	6241	3254	3377
G8	20	13410	6064	3077	3129
G9	20	14108	6313	3179	3216
G10	20	8638	3859	2193	2737
G11	20	7868	3544	2026	2555
G12	20	7931	3670	2096	2655
H1	20	10431	4829	2624	2884
H2	20	10872	5029	2719	2948
H3	20	12367	5706	3165	3545
H4	20	30748	14177	6183	4001
H5	20	24881	11491	4998	3358
H6	20	16413	7575	3439	2672
H7	20	10176	4662	2606	3064
H8	20	10312	4763	2698	3255
H9	20	10597	4792	2472	2652
H10	20	618	4065	3735	4595
H11	20	567	4562	3978	4419
H12	20	666	4983	4238	4378
A1	21	9816	4574	2808	3606
A2	21	10425	4840	2959	3787
A3	21	12413	5682	3286	3866
A4	21	5348	2425	2160	3839
A5	21	5322	2432	2139	3783
A6	21	5089	2301	2091	3726
A7	21	9586	4321	2582	3305
A8	21	11140	4930	2713	3129
A9	21	12693	5640	2969	3256
A10	21	8040	3650	2390	3419
A11	21	6543	2943	1966	2904
A12	21	8281	3840	2460	3365
B1	21	7340	3300	2278	3380
B2	21	10293	4741	2833	3545
B3	21	12151	5539	3269	3925
B4	21	12214	5785	3874	5505
B5	21	25136	11555	5497	4601
B6	21	29155	13168	6144	5053
B7	21	2947	1446	2252	5020
B8	21	6625	3147	2506	4140
B9	21	5181	2408	2245	4110
B10	21	842	2134	2921	5363
B11	21	726	4203	3678	4308
B12	21	626	2764	3149	4975
C1	21	398	281	264	250
C2	21	521	331	280	261
C3	21	516	332	272	274
C4	21	490	269	225	228
C5	21	613	359	288	270
C6	21	410	244	203	207
C7	21	292	175	147	157
C8	21	437	258	216	217
C9	21	351	226	195	195
C10	21	393	252	205	209
C11	21	360	201	202	184
C12	21	455	296	253	227
D1	21	363	254	236	214
D2	21	352	183	181	198
D3	21	358	216	198	185
D4	21	436	257	225	224
D5	21	385	208	165	176
D6	21	450	267	231	222
D7	21	368	165	142	165
D8	21	389	255	208	203
D9	21	333	189	167	163
D10	21	384	236	195	191
D11	21	411	258	222	214
D12	21	415	269	221	230
E1	21	12613	5822	3354	3965
E2	21	13564	6026	3156	3266
E3	21	13361	6017	3139	3265
E4	21	6194	2765	2150	3471
E5	21	7858	3484	2095	2705
E6	21	8690	3858	2350	3085
E7	21	12504	5350	2649	2663
E8	21	13726	6171	3133	3178
E9	21	14441	6425	3183	3166
E10	21	8604	3856	2220	2810
E11	21	8562	3806	2161	2688
E12	21	8024	3650	2088	2621
F1	21	11437	5264	2950	3365
F2	21	12229	5550	3033	3349
F3	21	13284	5999	3151	3304
F4	21	26614	12191	5495	3967
F5	21	32232	14698	6493	4468
F6	21	30613	13805	5936	3990
F7	21	7795	3456	2283	3215
F8	21	9189	4227	2663	3643
F9	21	8497	3819	2318	3142
F10	21	649	3113	3305	4930
F11	21	480	3463	3295	4375
F12	21	575	4504	3978	4148
G1	21	13314	6193	3379	3683
[truncated: 1,847 more rows]

## Sheet: Multicomponent Data
Block Type	96well
Chemistry	TAQMAN
Experiment File Name	C:\Users\SamanthaK\Desktop\ForChecking\SK10072014_1.eds
Experiment Run End Time	Not Started
Instrument Type	steponeplus
Passive Reference	ROX
Well	Cycle	FAM	ROX	VIC
A1	1	4107.1	2929.39
A2	1	4260.84	3045.67
A3	1	5114.62	2960.12
A4	1	1998.73	3157.38
A5	1	2100.14	3253.49
A6	1	2029.42	3187.24
A7	1	3974.94	2595.01
A8	1	4604.76	2332.96
A9	1	5270.87	2389.92
A10	1	3330.79	2814.77
A11	1	2749.18	2429.54
A12	1	3493.29	2790.27
B1	1	3064.81	2834.58
B2	1	4263.22	2804.71
B3	1	4947.68	2945.9
B4	1	4816.57	4433.04
B5	1	10406	2989
B6	1	11976.1	3186.62
B7	1	1003.62	4518.04
B8	1	2638.84	3530.45
B9	1	1979.67	3504.32
B10	1		4507.92	1858.91
B11	1		3003.95	4296.69
B12	1		4062.22	2630.26
C1	1
C2	1
C3	1
C4	1
C5	1
C6	1
C7	1
C8	1
C9	1
C10	1
C11	1
C12	1
D1	1
D2	1
D3	1
D4	1
D5	1
D6	1
D7	1
D8	1
D9	1
D10	1
D11	1
D12	1
E1	1	5211.5	3070.78
E2	1	5496.33	2253.06
E3	1	5600.23	2355.06
E4	1	2393.83	2932.84
E5	1	3274.8	2042.16
E6	1	3589.88	2368.42
E7	1	5173.05	1780.71
E8	1	5694.5	2251.81
E9	1	6030.81	2204.38
E10	1	3414.65	2122.81
E11	1	3457.5	2071.45
E12	1	3291.64	2004.64
F1	1	4779.42	2527.39
F2	1	4949.54	2444.26
F3	1	5491.81	2380.08
F4	1	11320.7	2479.49
F5	1	13092.6	2440.69
F6	1	12649.9	2103.9
F7	1	3070.88	2603.26
F8	1	3722.88	2899.8
F9	1	3431.93	2452.19
F10	1		3823.68	2784.59
F11	1		3217.71	3302.71
F12	1		2821.9	4752.26
G1	1	5854.93	2778.96
G2	1	6171.27	2612.66
G3	1	6916.25	2657.94
G4	1	3206.58	2853.95
G5	1	3520.65	2350.66
G6	1	3843.22	2250.51
G7	1	5670.43	2453.01
G8	1	5564.11	2174.76
G9	1	5849.18	2207.36
G10	1	3543.56	2050.07
G11	1	3326.6	1987
G12	1	3382.6	2063.46
H1	1	4790	2224.65
H2	1	4845.73	2246.34
H3	1	5391.84	2652.82
H4	1	13363.7	2207.51
H5	1	10648.5	1854.7
H6	1	6978.77	1664.52
H7	1	4289.08	2321.52
H8	1	4325.08	2468.47
H9	1	4457.14	1882.36
H10	1		3227.43	4045.3
H11	1		2927.16	4581.03
H12	1		2903.5	5374.06
A1	2	4123.18	2900.08
A2	2	4311.25	3049.48
A3	2	5184.6	2972.72
A4	2	2052.15	3212.99
A5	2	2145.02	3297.27
A6	2	2036.77	3205.32
A7	2	4017.76	2618.01
A8	2	4664.48	2342.3
A9	2	5349.01	2410.14
A10	2	3361.21	2828.54
A11	2	2782.98	2470.88
A12	2	3527.14	2785.93
B1	2	3102.01	2843.68
B2	2	4463.98	2887.54
B3	2	5129.77	3022.29
B4	2	5010.66	4579.73
B5	2	10765.6	3049.56
B6	2	12428.6	3249.53
B7	2	1047.24	4623.57
B8	2	2731.88	3607.69
B9	2	2048.1	3580.47
B10	2		4588.02	1931.23
B11	2		3055.39	4421.79
B12	2		4103.2	2689.46
C1	2
C2	2
C3	2
C4	2
C5	2
C6	2
C7	2
C8	2
C9	2
C10	2
C11	2
C12	2
D1	2
D2	2
D3	2
D4	2
D5	2
D6	2
D7	2
D8	2
D9	2
D10	2
D11	2
D12	2
E1	2	5300.49	3086.22
E2	2	5716.47	2311.84
E3	2	5768.88	2387.34
E4	2	2486.22	2987.68
E5	2	3381.25	2117.39
E6	2	3671.11	2409.03
E7	2	5332.52	1854.58
E8	2	5867.05	2290.16
E9	2	6237.21	2269.81
E10	2	3513.61	2178.56
E11	2	3568.83	2122.55
E12	2	3347.31	2019.28
F1	2	4831.81	2557.15
F2	2	5146.05	2513.48
F3	2	5672.18	2435.35
F4	2	11597.7	2477.83
F5	2	13545.6	2485.86
F6	2	12988.7	2122.85
F7	2	3175.52	2642.91
F8	2	3849.94	2965.3
F9	2	3536.69	2508.4
F10	2		3902.74	2877.64
F11	2		3286.01	3423.52
F12	2		2842.92	4764.26
G1	2	5944.03	2832.1
G2	2	6271.53	2623.28
G3	2	7107.54	2751.4
G4	2	3240.57	2947.91
G5	2	3542.57	2412.45
G6	2	3853.88	2290.94
G7	2	5839.33	2484
G8	2	5703.99	2219.67
G9	2	6031.41	2264.58
G10	2	3650.94	2084
G11	2	3382	2021.01
G12	2	3412.85	2079.95
H1	2	4751.75	2192.7
H2	2	4844.68	2236.66
H3	2	5345.78	2613.47
H4	2	13369	2179.8
H5	2	10640.4	1808.2
H6	2	7003.64	1629.22
H7	2	4320.96	2338.68
H8	2	4387.49	2476.63
H9	2	4485.07	1885.72
H10	2		3279.79	4087.62
H11	2		2959.75	4616.14
H12	2		2926.15	5400.11
A1	3	4170.06	2903.15
A2	3	4402.61	3085.04
A3	3	5278.94	2992.68
A4	3	2108.97	3302.84
A5	3	2181.75	3341.01
A6	3	2083.21	3274.44
A7	3	4083.86	2639.24
A8	3	4733.28	2384.63
A9	3	5419.51	2429.51
A10	3	3388.21	2861.01
A11	3	2787.69	2456.06
A12	3	3564.52	2820.47
B1	3	3119.58	2845.76
B2	3	4468.88	2882.58
B3	3	5167.82	3035.69
B4	3	5056.05	4637.61
B5	3	10861	3072.97
B6	3	12604.9	3297.56
B7	3	1044.48	4646.91
B8	3	2754.31	3638.97
B9	3	2070.28	3626.91
B10	3		4611.6	1940.18
B11	3		3105.83	4454.9
B12	3		4136.51	2713.74
C1	3
C2	3
C3	3
C4	3
C5	3
C6	3
C7	3
C8	3
C9	3
C10	3
C11	3
C12	3
D1	3
D2	3
D3	3
D4	3
D5	3
D6	3
D7	3
D8	3
D9	3
D10	3
D11	3
D12	3
E1	3	5365.52	3106.08
E2	3	5793.87	2352.62
E3	3	5831.62	2406.19
E4	3	2504.31	2995.39
E5	3	3371.67	2085.38
E6	3	3699.61	2439.02
E7	3	5419.43	1866.6
E8	3	5929.39	2301.4
E9	3	6293.91	2276.63
E10	3	3560.14	2201.01
E11	3	3578.8	2120.87
E12	3	3408.91	2070.41
F1	3	4899.15	2588.75
F2	3	5221.73	2563.16
F3	3	5747.98	2475.62
F4	3	11649.5	2438.04
F5	3	13627.8	2467.7
F6	3	13173.2	2137.01
F7	3	3244.2	2691.17
F8	3	3896.29	3013.21
F9	3	3590.14	2534.59
F10	3		3945.05	2910.45
F11	3		3289.3	3382.5
F12	3		2878.56	4811.61
G1	3	5981.39	2849.49
G2	3	6256.41	2622.36
G3	3	7103.04	2734.13
G4	3	3218.26	2985.37
G5	3	3524.85	2483.82
G6	3	3784.16	2298.58
G7	3	5860.43	2505.77
G8	3	5752.99	2235.54
G9	3	6112.99	2294.48
G10	3	3679.9	2089.95
G11	3	3398.29	2012.69
G12	3	3460.21	2121.19
H1	3	4751.15	2215.07
H2	3	4864.68	2253.12
H3	3	5433.56	2658.54
H4	3	13509.1	2171.92
H5	3	10752	1831.94
H6	3	7101.21	1639.99
H7	3	4385.49	2370.18
H8	3	4447.4	2499.54
H9	3	4573.24	1927.75
H10	3		3341.09	4149.17
H11	3		3011.4	4679.8
H12	3		2958.3	5407.13
A1	4	4209.63	2935.78
A2	4	4462.71	3107.76
A3	4	5346.83	3021.24
A4	4	2144.44	3365.88
A5	4	2210.58	3374.66
A6	4	2107.7	3312.29
A7	4	4126.24	2663.77
A8	4	4801.29	2400.64
A9	4	5478.6	2450.18
A10	4	3441.98	2879.03
A11	4	2825.24	2470.82
A12	4	3593.77	2845.27
B1	4	3133.65	2864.92
B2	4	4461.55	2871.79
B3	4	5188.26	3059.58
B4	4	5092.81	4660.62
B5	4	10941.8	3083.57
B6	4	12687.2	3307.21
B7	4	1054.6	4674.78
B8	4	2762.5	3638.22
B9	4	2108.1	3684.31
B10	4		4668.51	1963.93
B11	4		3106.98	4465.5
B12	4		4189.04	2746.84
C1	4
C2	4
C3	4
C4	4
C5	4
C6	4
C7	4
C8	4
C9	4
C10	4
C11	4
C12	4
D1	4
D2	4
D3	4
D4	4
D5	4
D6	4
D7	4
D8	4
D9	4
D10	4
D11	4
D12	4
E1	4	5408.19	3146.58
E2	4	5860.61	2386.14
E3	4	5872.87	2418.38
E4	4	2513.66	3007.05
E5	4	3372.71	2096.19
E6	4	3711.7	2465.69
E7	4	5462.14	1875.61
E8	4	5952.91	2316.68
E9	4	6318.88	2279.15
E10	4	3613.75	2228.61
E11	4	3612.42	2119.7
E12	4	3426.4	2071.3
F1	4	4936.52	2603.02
F2	4	5238.93	2548.27
F3	4	5772.83	2462.9
F4	4	11681	2452.6
F5	4	13770.1	2510.75
F6	4	13248.7	2163.59
F7	4	3261.83	2721.25
F8	4	3910.75	3020.64
F9	4	3600.14	2557.44
F10	4		4016.09	2973.29
F11	4		3282.45	3421.11
F12	4		2878.04	4803.98
G1	4	6005.51	2887.31
G2	4	6255.41	2657.32
G3	4	7095.88	2759.3
G4	4	3194.94	3012.66
G5	4	3477.64	2484.65
G6	4	3719.16	2324.01
G7	4	5907.38	2503.26
G8	4	5799.95	2246.12
G9	4	6160.95	2329.35
G10	4	3721.06	2140.56
G11	4	3407.34	2020.99
G12	4	3467.48	2107.14
H1	4	4713.86	2192.11
H2	4	4874.77	2271.57
H3	4	5453.82	2689.98
H4	4	13610	2174.7
H5	4	10877.6	1839.49
H6	4	7181.24	1644.81
H7	4	4431.23	2399.4
H8	4	4491.72	2546
H9	4	4628.37	1946.19
H10	4		3368.82	4182.56
H11	4		3056.45	4757.26
H12	4		2983.54	5461.73
A1	5	4254.27	2970.13
A2	5	4520.98	3137.68
A3	5	5403.83	3050.49
A4	5	2132.01	3301.65
A5	5	2225.5	3397.01
A6	5	2125.34	3319.82
A7	5	4170.26	2684.9
A8	5	4854.59	2434.98
A9	5	5519.03	2465.94
A10	5	3461.22	2896.05
A11	5	2834.62	2478.06
A12	5	3611.48	2858.45
B1	5	3142.26	2860.33
B2	5	4483.46	2893.89
B3	5	5201.69	3072.15
B4	5	5140.2	4651.01
B5	5	11043.4	3136.77
B6	5	12776.7	3338.38
B7	5	1071.4	4731.77
B8	5	2761	3641.13
B9	5	2105.15	3695.28
B10	5		4689.47	2004.25
B11	5		3101.6	4463.76
B12	5		4171.99	2760.71
C1	5
C2	5
C3	5
C4	5
C5	5
C6	5
C7	5
C8	5
C9	5
C10	5
C11	5
C12	5
D1	5
D2	5
D3	5
D4	5
D5	5
D6	5
D7	5
D8	5
D9	5
D10	5
D11	5
D12	5
E1	5	5474	3154.02
E2	5	5889.75	2404.35
E3	5	5905.64	2466.34
E4	5	2545.56	3107.24
E5	5	3407.29	2146.92
E6	5	3746.45	2512.29
E7	5	5479.25	1904.21
E8	5	5986.31	2333.57
E9	5	6365.92	2307.16
E10	5	3623.13	2230.49
E11	5	3638.67	2140.99
E12	5	3448.38	2076.24
F1	5	4989.9	2653.98
F2	5	5267.14	2563.98
F3	5	5826.19	2510.99
F4	5	11967.1	2546.89
F5	5	13915.8	2543.75
F6	5	13393	2165.12
F7	5	3283.82	2720.49
F8	5	3938.01	3033.23
F9	5	3622.3	2565.17
F10	5		4037.94	3005.1
F11	5		3328.2	3477.49
F12	5		2884.39	4825.14
G1	5	5955.51	2855.16
G2	5	6245.41	2665.14
G3	5	7092.13	2755.9
G4	5	3179.73	2967.94
G5	5	3438.31	2492.38
G6	5	3698.23	2334.83
G7	5	5953.64	2540.37
G8	5	5825.28	2261.31
G9	5	6179.32	2323.68
G10	5	3743.75	2157.83
G11	5	3430.38	2018.77
G12	5	3481.03	2117.48
H1	5	4753.61	2241.65
H2	5	4887.37	2274.51
H3	5	5496.64	2729.22
H4	5	13859.2	2227.92
H5	5	10983.3	1865.81
H6	5	7235.68	1669.2
H7	5	4466.94	2417.51
H8	5	4519.07	2567.03
H9	5	4656.06	1965.7
H10	5		3386.89	4242.25
H11	5		3101.61	4838.75
H12	5		3002.46	5472.04
A1	6	4278.92	2978.75
A2	6	4556.24	3160.32
A3	6	5441.59	3074.53
A4	6	2186.87	3411.65
A5	6	2240.18	3406.34
A6	6	2132.52	3351.69
A7	6	4170.03	2670.79
A8	6	4878.93	2445.34
A9	6	5574.4	2513.53
A10	6	3480.38	2906.05
A11	6	2851.7	2496.78
A12	6	3618.71	2855.7
B1	6	3154.08	2890.93
B2	6	4495.07	2890.82
B3	6	5218.85	3076.21
B4	6	5163.75	4700.9
B5	6	11115.8	3143.1
B6	6	12795.1	3331.65
B7	6	1080.77	4751.81
B8	6	2778.01	3664.52
B9	6	2120.45	3681.59
B10	6		4713.08	2016.88
B11	6		3125.3	4471.04
B12	6		4213.03	2798.37
C1	6
C2	6
C3	6
C4	6
C5	6
C6	6
C7	6
C8	6
C9	6
C10	6
C11	6
C12	6
D1	6
D2	6
D3	6
D4	6
D5	6
D6	6
D7	6
D8	6
D9	6
D10	6
D11	6
D12	6
E1	6	5492.54	3173.82
E2	6	5926.34	2409.08
E3	6	5887.43	2438.98
E4	6	2556.59	3077.17
E5	6	3396.54	2164.9
E6	6	3761.45	2515.12
E7	6	5507.38	1899.34
E8	6	6016.99	2335.6
E9	6	6393.62	2321.25
E10	6	3652.84	2245.86
E11	6	3640.59	2133.05
E12	6	3476.4	2098.03
F1	6	4994.25	2630.8
F2	6	5287.72	2585.23
F3	6	5801.39	2490.83
F4	6	11825.8	2482.45
F5	6	14054.1	2575.67
F6	6	13460.1	2189.1
F7	6	3309.75	2736.76
F8	6	3947.98	3035.89
F9	6	3649.36	2583.38
F10	6		4057.65	3032.12
F11	6		3327.34	3481.67
F12	6		2912.94	4849.44
G1	6	5945.19	2855.41
G2	6	6303.55	2679.27
G3	6	7116.83	2798.89
G4	6	3188.3	3042.82
G5	6	3412.38	2469.69
G6	6	3688.35	2368.1
G7	6	5984.85	2547.69
G8	6	5868.4	2270.76
G9	6	6216.07	2325.06
G10	6	3769.64	2175.92
G11	6	3445.51	2053.29
G12	6	3492.66	2128.46
H1	6	4751.87	2256.35
H2	6	4884.4	2295.44
H3	6	5483.73	2721.74
H4	6	13818.5	2210.21
H5	6	11078.5	1883.73
H6	6	7272.28	1689.85
H7	6	4491.71	2434.7
H8	6	4541.21	2563.66
H9	6	4663.35	1969.42
H10	6		3409.13	4272.82
H11	6		3126.04	4864.73
H12	6		3032.14	5487.69
A1	7	4322.2	3026.8
A2	7	4566.23	3161.39
A3	7	5477.66	3102.95
A4	7	2196.63	3427.23
A5	7	2240.5	3428.23
A6	7	2138.89	3363.77
A7	7	4185.34	2685.47
A8	7	4859.26	2430.96
A9	7	5555.62	2493.59
A10	7	3475.79	2921.86
A11	7	2850.23	2499.35
A12	7	3635.5	2875.07
B1	7	3149.59	2902.35
B2	7	4523.68	2922.66
B3	7	5246.17	3100.2
B4	7	5196.89	4736.33
B5	7	11124.9	3146.48
B6	7	12843.7	3352.07
B7	7	1089.12	4765.27
B8	7	2819.34	3717
B9	7	2143.11	3755.99
B10	7		4703.63	2036.03
B11	7		3149.44	4528.78
B12	7		4210.92	2794.72
C1	7
C2	7
C3	7
C4	7
C5	7
C6	7
C7	7
C8	7
C9	7
C10	7
C11	7
C12	7
D1	7
D2	7
D3	7
D4	7
D5	7
D6	7
D7	7
D8	7
D9	7
D10	7
D11	7
D12	7
E1	7	5522.18	3177.94
E2	7	6004.88	2444.57
E3	7	5910.31	2458.31
E4	7	2562.17	3080.11
E5	7	3397.6	2169.48
E6	7	3758.64	2516.17
E7	7	5534.08	1900.96
E8	7	6030.33	2341.37
E9	7	6415.34	2326.66
E10	7	3655.12	2247.77
E11	7	3638.44	2140.23
E12	7	3485.73	2098.08
F1	7	5006.01	2656.21
F2	7	5365.8	2635.93
F3	7	5803.69	2505.67
F4	7	11802.3	2461.35
F5	7	14131.4	2603.21
F6	7	13479.3	2192.21
F7	7	3322.31	2749.44
F8	7	3973	3046.28
F9	7	3671.01	2600.18
F10	7		4042.19	3036.08
F11	7		3330.55	3511.38
F12	7		2903.5	4876.14
G1	7	5959.48	2872.75
G2	7	6273.25	2680.77
G3	7	7158.89	2794.99
G4	7	3172.39	3082.01
G5	7	3404.61	2495.64
G6	7	3678.56	2380.94
G7	7	6013.27	2555.64
G8	7	5903.37	2289.51
G9	7	6255.61	2343.34
G10	7	3788.46	2182.39
G11	7	3460.64	2055.58
G12	7	3486.77	2137.06
H1	7	4741.02	2258.52
H2	7	4901.52	2306.19
H3	7	5486.94	2748.1
H4	7	13837.3	2221.21
H5	7	11129.3	1902.09
H6	7	7284.05	1693.17
H7	7	4503.58	2456.4
H8	7	4536.97	2593.58
H9	7	4679.97	1987.03
H10	7		3419.16	4310.1
H11	7		3135.45	4887.88
H12	7		3019.38	5500.92
A1	8	4307.7	3009.02
A2	8	4572.71	3167.07
A3	8	5488.86	3094.53
A4	8	2207.16	3461.16
A5	8	2237.69	3412.53
A6	8	2128.08	3350.06
A7	8	4208.06	2708.06
A8	8	4909.68	2450.5
A9	8	5563.71	2502.5
A10	8	3487.77	2922.86
A11	8	2854.55	2510.63
A12	8	3639.94	2870.69
B1	8	3148.75	2889.64
B2	8	4535.65	2934.47
B3	8	5285.77	3142.28
B4	8	5205.34	4738.62
B5	8	11187.8	3169.68
B6	8	12896.6	3355.13
B7	8	1093.11	4784.04
B8	8	2807.36	3695.92
B9	8	2145.85	3756.26
B10	8		4748.78	2071.85
B11	8		3165.16	4527.66
B12	8		4215.35	2823.72
C1	8
C2	8
C3	8
C4	8
C5	8
C6	8
C7	8
C8	8
C9	8
C10	8
C11	8
C12	8
D1	8
D2	8
D3	8
D4	8
D5	8
D6	8
D7	8
D8	8
D9	8
D10	8
D11	8
D12	8
E1	8	5500.29	3187.52
E2	8	5998.95	2441.38
E3	8	5905.98	2439.22
E4	8	2566.07	3072.89
E5	8	3458.1	2251.08
E6	8	3745.2	2520.88
E7	8	5529.59	1905.98
E8	8	6071.74	2365.37
E9	8	6433.9	2319.68
E10	8	3698.1	2275.17
E11	8	3664.17	2124.38
E12	8	3505.14	2117.1
F1	8	4997.75	2643.43
F2	8	5348.98	2630.48
F3	8	5808.94	2503.15
F4	8	11821.1	2462
F5	8	14272.3	2636.87
F6	8	13510.5	2195.94
F7	8	3319.1	2728.87
F8	8	3982.08	3064.29
F9	8	3682.09	2590.24
F10	8		4070.51	3083.55
F11	8		3372.64	3549.36
F12	8		2939.94	4897.04
G1	8	5976.07	2889.02
G2	8	6247.55	2672.07
G3	8	7188.08	2831.33
G4	8	3177.57	3101.99
G5	8	3343.63	2443.83
G6	8	3637.44	2363.47
G7	8	6035.29	2574.39
G8	8	5920.27	2304.63
G9	8	6272.58	2359.28
G10	8	3808.04	2195.82
G11	8	3469.03	2072.15
G12	8	3506.78	2148.37
H1	8	4733.08	2254.52
H2	8	4894.91	2311.64
H3	8	5490.33	2748.74
H4	8	13834.9	2215.28
H5	8	11182.4	1913.04
H6	8	7302.37	1688.46
H7	8	4505.03	2443.58
H8	8	4556.98	2600.86
H9	8	4687.39	2008.79
H10	8		3417.9	4334.06
H11	8		3154.85	4930.88
H12	8		3035.14	5483.42
A1	9	4315.29	2988.86
A2	9	4581.62	3166.54
A3	9	5498.81	3110.21
A4	9	2216.89	3450.52
A5	9	2243.75	3430.49
A6	9	2136.18	3383.41
A7	9	4219.99	2712.95
A8	9	4904.13	2466.56
A9	9	5596.69	2509.22
A10	9	3501.36	2935.05
A11	9	2862.58	2507.79
A12	9	3648.5	2884.12
B1	9	3181.64	2903.73
B2	9	4537.25	2932.25
B3	9	5293.39	3139.94
B4	9	5219.78	4754.96
B5	9	11128.8	3121.58
B6	9	12975.2	3376.74
B7	9	1101.57	4784.85
B8	9	2836.63	3726.83
B9	9	2154.34	3753.95
B10	9		4775.65	2098.84
B11	9		3153.56	4562.76
B12	9		4231	2844.19
C1	9
C2	9
C3	9
C4	9
C5	9
C6	9
C7	9
C8	9
C9	9
C10	9
C11	9
C12	9
D1	9
D2	9
D3	9
D4	9
D5	9
D6	9
D7	9
D8	9
D9	9
D10	9
D11	9
D12	9
E1	9	5518.51	3192.84
E2	9	6038.21	2462.92
E3	9	5923.6	2469.22
E4	9	2594.12	3110.39
E5	9	3426.21	2195.65
E6	9	3755.26	2548.27
E7	9	5556.02	1897.91
E8	9	6099.13	2364.9
E9	9	6460.1	2334.65
E10	9	3727.22	2299.8
E11	9	3701.5	2179.49
E12	9	3543.24	2151.17
F1	9	5018.81	2667.35
F2	9	5370.96	2635.86
F3	9	5854.63	2540.38
F4	9	11923.7	2480.66
F5	9	14200	2609.55
F6	9	13561.4	2207.76
F7	9	3343.11	2747.66
F8	9	4007.77	3075.9
F9	9	3705.43	2625.54
F10	9		4105.95	3099.62
F11	9		3383.15	3557.62
F12	9		2971.83	4962.04
G1	9	6025.44	2916.1
G2	9	6249.84	2677.56
G3	9	7206.61	2846.76
G4	9	3159.75	3098.76
G5	9	3372.89	2512.91
G6	9	3637.37	2381.98
G7	9	6052.52	2593.92
G8	9	5957.41	2318.1
G9	9	6284.52	2373
G10	9	3806.04	2213.3
G11	9	3476.77	2074.1
G12	9	3534.29	2180.85
H1	9	4716.46	2264.79
H2	9	4909.47	2329.31
H3	9	5501.16	2769.12
H4	9	13894.8	2223.43
H5	9	11183.6	1905.72
H6	9	7324.69	1710.61
H7	9	4526.5	2458.96
H8	9	4568.25	2621.82
H9	9	4711.9	2018.16
H10	9		3462.92	4382.16
H11	9		3150.1	4969.63
H12	9		3019.27	5515
A1	10	4330.63	3020.71
A2	10	4583.55	3171.21
A3	10	5506.32	3111.6
A4	10	2171.7	3357.98
A5	10	2241.35	3447.86
A6	10	2151.22	3392.79
A7	10	4228.57	2733.57
A8	10	4891.15	2439.13
A9	10	5608.07	2514.16
A10	10	3495.58	2937.88
A11	10	2866.21	2528.72
A12	10	3630.08	2865.67
B1	10	3187.34	2922.43
B2	10	4544.5	2928.57
B3	10	5294.39	3161.23
B4	10	5243.19	4718.03
B5	10	11072.3	3105.86
B6	10	13015.4	3409.94
B7	10	1110.8	4785.95
B8	10	2855.52	3756.76
B9	10	2158.24	3770.1
B10	10		4752.5	2085.83
B11	10		3167.79	4597.02
B12	10		4258.87	2866.51
C1	10
C2	10
C3	10
C4	10
C5	10
C6	10
C7	10
C8	10
C9	10
C10	10
C11	10
C12	10
D1	10
D2	10
D3	10
D4	10
D5	10
D6	10
D7	10
D8	10
D9	10
D10	10
D11	10
D12	10
E1	10	5519.49	3187.61
E2	10	5990.93	2431.72
E3	10	5921.07	2456.21
E4	10	2609.22	3186.09
E5	10	3378.26	2156.05
E6	10	3749.71	2541.28
E7	10	5542.35	1885.87
E8	10	6116.58	2363.01
E9	10	6478.52	2349.31
E10	10	3699.81	2280.7
E11	10	3707.76	2179.62
E12	10	3525.28	2153.09
F1	10	5007.38	2660.19
F2	10	5349.52	2605.15
F3	10	5846.24	2521.06
F4	10	12191.7	2585.41
F5	10	14001.9	2535.06
F6	10	13643.9	2234.49
F7	10	3344.14	2757.91
F8	10	4008.41	3059.98
F9	10	3706.95	2628.3
F10	10		4074.61	3080.93
F11	10		3404.16	3590.64
F12	10		2956.49	4968.02
G1	10	6001.97	2934.02
G2	10	6255.4	2692.76
G3	10	7205.5	2857.03
G4	10	3156.01	3060.75
G5	10	3413.25	2566.46
G6	10	3620.31	2372.48
G7	10	6059.3	2577.83
G8	10	5983.45	2335.36
G9	10	6286.78	2369.28
G10	10	3795.03	2206.89
G11	10	3465.63	2062.12
G12	10	3542.22	2187.93
H1	10	4705.41	2251.49
H2	10	4894.09	2318.4
H3	10	5477.01	2756.97
H4	10	13999.1	2261.22
H5	10	11108.5	1903.4
H6	10	7351.41	1715.74
H7	10	4529.01	2464.78
H8	10	4570.05	2608.2
H9	10	4722.05	2020.99
H10	10		3468.25	4413.64
H11	10		3169.18	5007.43
H12	10		3030.25	5516.1
A1	11	4328.07	2989.21
A2	11	4608.03	3162.88
A3	11	5495.14	3105.87
A4	11	2182.51	3384.73
A5	11	2243.43	3438.32
A6	11	2150.58	3402.7
A7	11	4258.91	2746.3
A8	11	4923.21	2465.9
A9	11	5643.18	2531.85
A10	11	3504.29	2928.48
A11	11	2857.17	2524.27
A12	11	3647.3	2888.24
B1	11	3204.3	2939.88
B2	11	4537.63	2916.72
B3	11	5308.88	3148.73
B4	11	5256.79	4733.59
B5	11	11058.3	3075.84
B6	11	13047.6	3396
B7	11	1105.26	4796.33
B8	11	2836.52	3741.97
B9	11	2144.75	3733.87
B10	11		4805.19	2106.18
B11	11		3161.72	4606.29
B12	11		4263.98	2884.09
C1	11
C2	11
C3	11
C4	11
C5	11
C6	11
C7	11
C8	11
C9	11
C10	11
C11	11
C12	11
D1	11
D2	11
D3	11
D4	11
D5	11
D6	11
D7	11
D8	11
D9	11
D10	11
D11	11
D12	11
E1	11	5520.66	3190.98
E2	11	5985.07	2441.46
E3	11	5968.59	2486.36
E4	11	2607.24	3193.42
E5	11	3388.54	2159.16
E6	11	3782.86	2576.57
E7	11	5536.12	1903.48
E8	11	6127.51	2378.84
E9	11	6490.44	2344.94
E10	11	3724.76	2305.22
E11	11	3732.02	2198
E12	11	3562.98	2147.73
F1	11	5015.98	2666.5
F2	11	5354.41	2613.14
F3	11	5910.15	2575.9
F4	11	12219.7	2610.74
F5	11	14050.3	2544.95
F6	11	13664.9	2235.09
F7	11	3338.69	2726.43
F8	11	4019.63	3076.79
F9	11	3713.39	2625.81
F10	11		4102.45	3130.3
F11	11		3415.38	3615.08
F12	11		2968.78	5001.63
G1	11	6015.82	2925.36
G2	11	6262.68	2694.43
G3	11	7185.82	2822.57
G4	11	3161.39	3069.67
G5	11	3395.41	2583.53
G6	11	3612.49	2379.6
G7	11	6099.44	2607.76
G8	11	5966.04	2305.41
G9	11	6290.75	2359.19
G10	11	3803.76	2217
G11	11	3462.75	2057.89
G12	11	3561.15	2202.25
H1	11	4701.92	2245.52
H2	11	4896.99	2326.2
H3	11	5535.64	2807.03
H4	11	14036.9	2266.26
H5	11	11143.3	1906.96
H6	11	7385.92	1743.91
H7	11	4530.92	2447.07
H8	11	4590.98	2633.11
H9	11	4732.5	2035.6
H10	11		3493.87	4425.69
H11	11		3186.08	5054.03
H12	11		3015.54	5534.19
A1	12	4343.05	3000.94
A2	12	4617.17	3185.68
A3	12	5517.69	3111.27
A4	12	2198.46	3407.03
A5	12	2258.65	3454.05
A6	12	2162.17	3418.3
A7	12	4239.1	2733.74
A8	12	4930.42	2470.28
A9	12	5652.89	2531.74
A10	12	3510.86	2957.14
A11	12	2869.38	2514.08
A12	12	3654.96	2884.65
B1	12	3203.42	2932.21
B2	12	4522.86	2930.13
B3	12	5326.7	3159.09
B4	12	5274.27	4748.67
B5	12	11119.9	3120.81
B6	12	13063.3	3412.98
B7	12	1111.81	4846.11
B8	12	2844.33	3748.04
B9	12	2159.89	3760.93
B10	12		4779.66	2118.57
B11	12		3169.45	4655.73
B12	12		4291.58	2900.43
C1	12
C2	12
C3	12
C4	12
C5	12
C6	12
C7	12
C8	12
C9	12
C10	12
C11	12
C12	12
D1	12
D2	12
D3	12
D4	12
D5	12
D6	12
D7	12
D8	12
D9	12
D10	12
D11	12
D12	12
E1	12	5546.56	3188.72
E2	12	5991.34	2446.83
E3	12	5961.29	2500.64
E4	12	2613.83	3198.84
E5	12	3407.96	2190.85
E6	12	3782.19	2574.09
E7	12	5553.1	1907.84
E8	12	6136.99	2395.79
E9	12	6467.1	2339.8
E10	12	3706.23	2294.52
E11	12	3729.5	2192.73
E12	12	3562.08	2146.34
F1	12	5025.12	2670.44
F2	12	5353.4	2637.19
F3	12	5904.9	2559.75
F4	12	12211.7	2584.55
F5	12	14084.7	2537.17
F6	12	13717.2	2230.43
F7	12	3357.02	2750.83
F8	12	4035.33	3097.13
F9	12	3711.91	2622.25
F10	12		4079.8	3117.88
F11	12		3399.46	3635.59
F12	12		2988.16	5023.49
G1	12	6009.27	2929.1
G2	12	6275.82	2707.39
G3	12	7196.05	2848.67
G4	12	3151.22	3092.51
G5	12	3390.23	2586.56
G6	12	3614.76	2409.47
G7	12	6093.85	2597.96
G8	12	6006.94	2326.65
G9	12	6307.88	2363.17
G10	12	3808.2	2224.49
G11	12	3473.86	2087.47
G12	12	3564.53	2215.97
H1	12	4719.99	2277.16
H2	12	4898.7	2326.45
H3	12	5547.53	2814.51
H4	12	14063.2	2277.12
H5	12	11178.7	1904.9
H6	12	7399.58	1738.58
H7	12	4540.13	2478.51
H8	12	4594.36	2633.53
H9	12	4735.86	2035.38
H10	12		3499.86	4478.98
H11	12		3176.14	5079.08
H12	12		3028.05	5559.38
A1	13	4331.86	3011.66
A2	13	4616.99	3194.34
A3	13	5530.99	3139.38
A4	13	2202	3394.31
A5	13	2256.6	3463.4
A6	13	2160.74	3401.51
A7	13	4240.54	2737.01
A8	13	4915.91	2480.37
A9	13	5666.17	2546.5
A10	13	3506.23	2937.08
A11	13	2847.49	2514.99
A12	13	3661.32	2886.07
B1	13	3202.71	2917.78
B2	13	4545.33	2950.15
B3	13	5339.1	3169
B4	13	5278.6	4749.35
B5	13	11192.6	3159.11
B6	13	13091.7	3410.25
B7	13	1116.99	4847.02
B8	13	2862.43	3764.2
B9	13	2172.66	3772.68
B10	13		4795.97	2114.23
B11	13		3210.57	4688.54
B12	13		4279.07	2920.7
C1	13
C2	13
C3	13
C4	13
C5	13
C6	13
C7	13
C8	13
C9	13
C10	13
C11	13
C12	13
D1	13
D2	13
D3	13
D4	13
D5	13
D6	13
D7	13
D8	13
D9	13
D10	13
D11	13
D12	13
E1	13	5554.84	3214.61
E2	13	5988.14	2439.47
E3	13	5970.56	2486.17
E4	13	2617.76	3220.09
E5	13	3417.51	2192.85
E6	13	3783.93	2580.02
E7	13	5545.3	1892.49
E8	13	6139.59	2372.8
E9	13	6452.98	2332.41
E10	13	3716.39	2290
E11	13	3709.86	2188.83
E12	13	3557.88	2149.3
F1	13	5048.72	2690.72
F2	13	5363.8	2636.95
F3	13	5868.87	2532.86
F4	13	12199.4	2579.52
F5	13	14170.1	2556.7
F6	13	13743.9	2241.98
F7	13	3361.65	2771.29
F8	13	4042.2	3115.8
F9	13	3714.03	2632.55
F10	13		4066.49	3134.04
F11	13		3414.73	3628.78
F12	13		2992.32	5051.42
G1	13	6024.79	2930.85
G2	13	6274.85	2712.4
G3	13	7189.74	2869.78
G4	13	3128.56	3083.09
G5	13	3363.79	2558.71
G6	13	3602.98	2409.91
G7	13	6121.16	2630.73
G8	13	6047.48	2358.69
G9	13	6330.88	2387.89
G10	13	3823.93	2227.33
G11	13	3489.28	2098.64
G12	13	3564.71	2204.57
H1	13	4698.56	2261.88
H2	13	4897.52	2323.27
H3	13	5527.39	2786.3
H4	13	14119.9	2277.61
H5	13	11238.1	1921.78
H6	13	7418.88	1747.97
H7	13	4537.77	2470.32
H8	13	4596.61	2627.1
H9	13	4753.12	2041.81
H10	13		3505.7	4496.39
H11	13		3179.75	5097.95
H12	13		3061.65	5584.19
A1	14	4345.01	3013.68
A2	14	4625.35	3185.58
A3	14	5542.07	3153.11
A4	14	2202.31	3424.85
A5	14	2261.6	3460.79
A6	14	2170.48	3429.69
A7	14	4257.12	2751.09
A8	14	4926.68	2483.24
A9	14	5659.83	2534.42
A10	14	3507.97	2950.28
A11	14	2856.7	2500.94
A12	14	3660.37	2905.65
B1	14	3182.53	2921.49
B2	14	4563.58	2946.72
B3	14	5336.6	3165.03
B4	14	5291.57	4750.19
B5	14	11288	3188.54
B6	14	13045.6	3402.95
B7	14	1123.62	4849.27
B8	14	2854.96	3772.9
B9	14	2179.38	3778.14
B10	14		4802.8	2113.29
B11	14		3161.71	4655.42
B12	14		4264.79	2917.19
C1	14
C2	14
C3	14
C4	14
C5	14
C6	14
C7	14
C8	14
C9	14
C10	14
C11	14
C12	14
D1	14
D2	14
D3	14
D4	14
D5	14
D6	14
D7	14
D8	14
D9	14
D10	14
D11	14
D12	14
E1	14	5558.21	3217.84
E2	14	6001.73	2445.36
E3	14	5973.46	2490.19
E4	14	2616.83	3205.26
E5	14	3423.77	2220.54
E6	14	3777.34	2577.58
E7	14	5566.66	1917.01
E8	14	6155.55	2385.8
E9	14	6439	2308.19
E10	14	3743.8	2306.46
E11	14	3696.64	2150.67
E12	14	3560.43	2151.19
F1	14	5062.05	2689.13
F2	14	5365.34	2640.04
F3	14	5863.22	2523.76
F4	14	12181	2565.15
F5	14	14253.5	2600.79
F6	14	13764.6	2254.17
F7	14	3376.04	2767.72
F8	14	4051.51	3115.68
F9	14	3715.77	2636.07
F10	14		4113.2	3147.77
F11	14		3392.6	3641.36
F12	14		2984.89	5099.31
G1	14	6064.78	2970.09
G2	14	6308.13	2736.53
G3	14	7192.56	2862.65
G4	14	3135.64	3098.01
G5	14	3322.54	2534.22
G6	14	3588.11	2410.24
G7	14	6125.44	2613.44
G8	14	6037.79	2348.35
G9	14	6355.68	2408.23
G10	14	3840.2	2227.6
G11	14	3501.63	2101.78
G12	14	3567.43	2212.13
H1	14	4685.73	2240.89
H2	14	4897.49	2325.19
H3	14	5528.57	2789.3
H4	14	14150.6	2298.26
H5	14	11295.8	1939.19
H6	14	7422.94	1747.6
H7	14	4538.61	2466.2
H8	14	4607.1	2641.76
H9	14	4756.97	2049.9
H10	14		3489.43	4501.42
H11	14		3210.53	5093.3
H12	14		3038.45	5601.48
A1	15	4357.03	3044.92
A2	15	4626.66	3192.98
A3	15	5527.41	3129.96
A4	15	2218.61	3451.96
A5	15	2269.88	3474.53
A6	15	2163.63	3418.69
A7	15	4248.2	2729.44
A8	15	4937.81	2484.97
A9	15	5659.48	2507.44
A10	15	3514.07	2935.78
A11	15	2862.06	2507.89
A12	15	3649.31	2887.03
B1	15	3170.62	2910.36
B2	15	4560.15	2947.74
B3	15	5319.48	3147.83
B4	15	5292.35	4785.2
B5	15	11288.8	3164.49
B6	15	13096	3408.54
B7	15	1124.16	4862.11
B8	15	2875.7	3772.32
B9	15	2177.22	3786.29
B10	15		4797.73	2122.05
B11	15		3198.45	4676.76
B12	15		4280.48	2934.15
C1	15
C2	15
C3	15
C4	15
C5	15
C6	15
C7	15
C8	15
C9	15
C10	15
C11	15
C12	15
D1	15
D2	15
D3	15
D4	15
D5	15
D6	15
D7	15
D8	15
D9	15
D10	15
D11	15
D12	15
E1	15	5582.7	3218.61
E2	15	6014.9	2450.14
E3	15	5986.42	2513.6
E4	15	2612.52	3196.75
E5	15	3442.54	2228.56
E6	15	3784.66	2580.89
E7	15	5598.14	1915.93
E8	15	6166.86	2390.26
E9	15	6482.71	2327.72
E10	15	3741.15	2298.56
E11	15	3698.7	2152.28
E12	15	3567.37	2160.42
F1	15	5087.06	2697.45
F2	15	5378.53	2629
F3	15	5882.55	2538.15
F4	15	12100.5	2536.1
F5	15	14231.2	2578.95
F6	15	13773.2	2252
F7	15	3396.96	2779.28
F8	15	4058	3117.97
F9	15	3735.27	2635.12
F10	15		4088.17	3162.83
F11	15		3364.35	3659.86
F12	15		2992.19	5079.3
G1	15	6054.1	2953.33
G2	15	6316.88	2741.23
G3	15	7189.16	2861.63
G4	15	3125.3	3108.49
G5	15	3336.48	2553.2
G6	15	3585.27	2409.28
G7	15	6100.19	2591.18
G8	15	6046.41	2344.31
G9	15	6348.88	2405.99
G10	15	3839.11	2238.38
G11	15	3512.85	2101.74
G12	15	3573.38	2207.89
H1	15	4694.75	2266.25
H2	15	4912.56	2337.32
H3	15	5550.34	2814.57
H4	15	14149.5	2265.4
H5	15	11293.5	1931.96
H6	15	7439.44	1737.39
H7	15	4559.56	2492.08
H8	15	4619.57	2645.48
H9	15	4759.78	2036.95
H10	15		3496.82	4510.07
H11	15		3189.58	5112.17
H12	15		3045.32	5590.98
A1	16	4352.26	3021.65
A2	16	4642.76	3198.14
A3	16	5526.33	3137.88
A4	16	2211.05	3416.21
A5	16	2265.03	3464.1
A6	16	2159.25	3419.28
A7	16	4245.04	2736.47
A8	16	4945.59	2471.13
A9	16	5649.85	2518.74
A10	16	3533.95	2953.86
A11	16	2873.54	2507.94
A12	16	3648.15	2870.68
B1	16	3193.61	2932.95
B2	16	4568.72	2953.6
B3	16	5325.1	3163.87
B4	16	5278.73	4732.68
B5	16	11224.9	3145.21
B6	16	13124.3	3417.74
B7	16	1121.9	4850.94
B8	16	2878.64	3780.78
B9	16	2192.31	3823.68
B10	16		4811.32	2142.94
B11	16		3162.66	4650.28
B12	16		4283.69	2943.1
C1	16
C2	16
C3	16
C4	16
C5	16
C6	16
C7	16
C8	16
C9	16
C10	16
C11	16
C12	16
D1	16
D2	16
D3	16
D4	16
D5	16
D6	16
D7	16
D8	16
D9	16
D10	16
D11	16
D12	16
E1	16	5614.79	3233.14
E2	16	6033.12	2465.78
E3	16	5984.44	2498.7
E4	16	2620.4	3199.48
E5	16	3409.02	2203.1
E6	16	3782.67	2554.23
E7	16	5580.76	1905.16
E8	16	6178.61	2407.84
E9	16	6505.92	2351.68
E10	16	3762.46	2314.72
E11	16	3722.1	2168.96
E12	16	3552.8	2155.63
F1	16	5106.4	2714.82
F2	16	5386.68	2651.67
F3	16	5895.15	2532.68
F4	16	12175.1	2580.52
F5	16	14208	2583.94
F6	16	13798.6	2243.28
F7	16	3387.72	2784.5
F8	16	4061.88	3132.5
F9	16	3750.51	2667.78
F10	16		4109.6	3190.23
F11	16		3411.07	3686.56
F12	16		2986.53	5052.93
G1	16	6028.09	2918.96
G2	16	6293.14	2728.72
G3	16	7197.39	2869.13
G4	16	3128.13	3100.94
G5	16	3340.66	2570.97
G6	16	3602.45	2423.7
G7	16	6103.02	2613.18
G8	16	6039.32	2355.34
G9	16	6340.46	2404.37
G10	16	3855.51	2259.8
G11	16	3521.04	2104.92
G12	16	3578.59	2221.58
H1	16	4705.74	2285.99
H2	16	4926.4	2348.5
H3	16	5551.35	2824.25
H4	16	14167.6	2293.68
H5	16	11297.2	1947.74
H6	16	7433.68	1756.36
H7	16	4559.01	2504.37
H8	16	4621.3	2650.28
H9	16	4776.96	2059.16
H10	16		3519.41	4540.84
H11	16		3177.57	5152.44
H12	16		3053.4	5640.63
A1	17	4364.52	3045.57
A2	17	4642.31	3208.96
A3	17	5527.35	3141.01
A4	17	2210.85	3424.95
A5	17	2270.32	3482.48
A6	17	2171.37	3442.2
A7	17	4275.32	2752.96
A8	17	4958.45	2484.52
A9	17	5678.57	2536.91
A10	17	3526.15	2962.65
A11	17	2873.7	2535.97
A12	17	3656.29	2897.46
B1	17	3182.17	2928.98
B2	17	4586.53	2974.85
B3	17	5346.44	3186.97
B4	17	5295.55	4752.15
B5	17	11277.1	3160.82
B6	17	13103.9	3410.35
B7	17	1130.84	4839.79
B8	17	2883.7	3781.46
B9	17	2190.38	3766.62
B10	17		4799.77	2143.08
B11	17		3169.86	4685.43
B12	17		4273.07	2939.97
C1	17
C2	17
C3	17
C4	17
C5	17
C6	17
C7	17
C8	17
C9	17
C10	17
C11	17
C12	17
D1	17
D2	17
D3	17
D4	17
D5	17
D6	17
D7	17
D8	17
D9	17
D10	17
D11	17
D12	17
E1	17	5597.02	3235.66
E2	17	6046.95	2479.4
E3	17	5963.73	2488.61
E4	17	2616.85	3180.08
E5	17	3416.06	2218.22
E6	17	3763.21	2567.65
E7	17	5563.17	1891.71
E8	17	6175.64	2400.33
E9	17	6505.07	2363.24
E10	17	3771.63	2317.77
E11	17	3750.67	2170.69
E12	17	3544.73	2120.2
F1	17	5099.17	2705.35
F2	17	5418.55	2658.68
F3	17	5915.78	2552.74
F4	17	12132.5	2546.44
F5	17	14267.8	2583.37
F6	17	13791.4	2238.97
F7	17	3370.78	2750.66
F8	17	4071.75	3123.72
F9	17	3736.64	2651.95
F10	17		4137.37	3209.97
F11	17		3400.74	3698.67
F12	17		2967.52	5068.42
G1	17	6028.24	2936.9
G2	17	6290.06	2731.53
G3	17	7210.66	2868.13
G4	17	3119.1	3102.31
G5	17	3333.6	2576.92
G6	17	3589.06	2429.69
G7	17	6134.33	2632.15
G8	17	6029.34	2352.51
G9	17	6320.13	2388.88
G10	17	3843.91	2235.15
G11	17	3498.56	2093.19
G12	17	3569.94	2209.86
H1	17	4694.98	2270.48
H2	17	4940.11	2348.62
H3	17	5550.16	2831
H4	17	14176.7	2288.23
H5	17	11334	1945.32
H6	17	7450.17	1742.97
H7	17	4562.15	2495.57
H8	17	4635.22	2664.71
H9	17	4764.39	2032.55
H10	17		3528.39	4554.15
H11	17		3208.51	5157.99
H12	17		3033.38	5652.67
A1	18	4340.2	3014.04
A2	18	4642.75	3206.16
A3	18	5541.49	3128.31
A4	18	2212.3	3412.88
A5	18	2270.4	3471.76
A6	18	2174.81	3445.82
A7	18	4314.22	2789.89
A8	18	4989.43	2506.23
A9	18	5665.43	2534.19
A10	18	3534.14	2969
A11	18	2872.08	2526.81
A12	18	3660.27	2913.93
B1	18	3217.49	2943.34
B2	18	4599.04	2962.25
B3	18	5348.46	3176.61
B4	18	5311.67	4748.02
B5	18	11285.5	3167.95
B6	18	13137.8	3407.47
B7	18	1128.81	4833.28
B8	18	2865.83	3757.45
B9	18	2199.03	3796.5
B10	18		4793.54	2138.09
B11	18		3173.68	4709.22
B12	18		4257.69	2935.07
C1	18
C2	18
C3	18
C4	18
C5	18
C6	18
C7	18
C8	18
C9	18
C10	18
C11	18
C12	18
D1	18
D2	18
D3	18
D4	18
D5	18
D6	18
D7	18
D8	18
D9	18
D10	18
D11	18
D12	18
E1	18	5599.8	3239.31
E2	18	6039.19	2455.35
E3	18	5967.68	2499.63
E4	18	2618.35	3215.96
E5	18	3409.94	2197.85
E6	18	3798.39	2587.94
E7	18	5555.97	1914.55
E8	18	6149.93	2388.59
E9	18	6468.86	2340.05
E10	18	3763.1	2310.03
E11	18	3765.71	2201.39
E12	18	3556.17	2143.75
F1	18	5085.66	2692.04
F2	18	5431.82	2673.52
F3	18	5904.22	2535.54
F4	18	12156.3	2567.77
F5	18	14262.3	2587.1
F6	18	13818.6	2241.05
F7	18	3362.91	2725.25
F8	18	4054.68	3113.59
F9	18	3736.12	2632.93
F10	18		4114.81	3239.99
F11	18		3420	3707.89
F12	18		2962.71	5073.66
G1	18	6006.74	2927.41
G2	18	6299.56	2725.89
G3	18	7224.77	2915.68
G4	18	3115.59	3112.25
G5	18	3339.49	2592.44
G6	18	3582.18	2437.51
G7	18	6157.87	2637.2
G8	18	6026.1	2341.3
G9	18	6351.77	2394.32
G10	18	3857.87	2253.13
G11	18	3504.78	2097.7
G12	18	3559.82	2209.37
H1	18	4712.16	2277.18
H2	18	4931.48	2346.62
H3	18	5519.85	2787.88
H4	18	14180.2	2278.59
H5	18	11312.7	1932.74
H6	18	7464.09	1747.17
H7	18	4558.35	2463.88
H8	18	4644.6	2682.9
H9	18	4776.6	2053.15
H10	18		3520.63	4585.23
H11	18		3223.33	5181.3
H12	18		3053.36	5697.62
A1	19	4367.1	3043.83
A2	19	4656.3	3193.49
A3	19	5550.46	3139.81
A4	19	2260.09	3522.56
A5	19	2276.04	3464.71
A6	19	2179.91	3454.9
A7	19	4292.73	2757.96
A8	19	4978.06	2496.45
A9	19	5689.44	2539.81
A10	19	3546.83	2955.58
A11	19	2874.16	2522.03
A12	19	3666.76	2901.32
B1	19	3221.19	2953.89
B2	19	4581.13	2948.48
B3	19	5359.42	3185.19
B4	19	5332.8	4805.75
B5	19	11314	3181.55
B6	19	13155	3416.29
B7	19	1141.69	4843.48
B8	19	2879.82	3778.75
B9	19	2199.85	3805.02
B10	19		4825.45	2185.54
B11	19		3199.55	4720.93
B12	19		4265.73	2957.91
C1	19
C2	19
C3	19
C4	19
C5	19
C6	19
C7	19
C8	19
C9	19
C10	19
C11	19
C12	19
D1	19
D2	19
D3	19
D4	19
D5	19
D6	19
D7	19
D8	19
D9	19
D10	19
D11	19
D12	19
E1	19	5586.26	3225.3
E2	19	6025.49	2466.34
E3	19	5984.19	2509.32
E4	19	2631.02	3145.93
E5	19	3430.38	2225.48
E6	19	3818.08	2598.33
E7	19	5569.26	1888.18
E8	19	6161.52	2391.64
E9	19	6482.23	2345.1
E10	19	3808.09	2336.43
E11	19	3768.49	2189.72
E12	19	3556.95	2120.71
F1	19	5076.93	2699.71
F2	19	5393.27	2626.71
F3	19	5930.85	2556.22
F4	19	11977.9	2477.64
F5	19	14337	2584.45
F6	19	13872	2256.71
F7	19	3396.2	2760.33
F8	19	4075.28	3113.54
F9	19	3746.38	2649.82
F10	19		4132.59	3275.44
F11	19		3405.75	3750.68
F12	19		2945.43	5078.93
G1	19	6044.38	2948.09
G2	19	6300.62	2730.77
G3	19	7223.6	2884.1
G4	19	3134.56	3175.02
G5	19	3323.41	2555.95
G6	19	3580.66	2419.76
G7	19	6152.19	2634.41
G8	19	6035.71	2342
G9	19	6365.38	2408.52
G10	19	3852.67	2247.08
G11	19	3509.62	2091.57
G12	19	3561.5	2189.55
H1	19	4687.79	2270.28
H2	19	4899.24	2333.44
H3	19	5543.64	2822.91
H4	19	14057.6	2254.15
H5	19	11350.5	1941.61
H6	19	7488.01	1756.79
H7	19	4573.43	2483.43
H8	19	4648.27	2662.38
H9	19	4780.17	2061.15
H10	19		3532.44	4597.95
H11	19		3212.77	5208.61
H12	19		3072.91	5711.9
A1	20	4373.81	3042.29
A2	20	4663.12	3204.31
A3	20	5556.09	3160
A4	20	2279.15	3547.83
A5	20	2278.86	3470.68
A6	20	2180.34	3442.88
A7	20	4244.23	2728.83
A8	20	4956.43	2489.15
A9	20	5701.29	2536.11
A10	20	3554.64	2963.82
A11	20	2876.64	2515.31
A12	20	3674.69	2896
B1	20	3221.86	2966.15
B2	20	4589.56	2950.54
B3	20	5369.91	3191.22
B4	20	5357.85	4807.8
B5	20	11359.9	3179.54
B6	20	13166.5	3405.64
B7	20	1136.44	4858.92
B8	20	2895.11	3784.45
B9	20	2206.28	3807.42
B10	20		4819.95	2201.14
B11	20		3198.04	4781.51
B12	20		4263.69	2978.41
C1	20
C2	20
C3	20
C4	20
C5	20
C6	20
C7	20
C8	20
C9	20
C10	20
C11	20
C12	20
D1	20
D2	20
D3	20
D4	20
D5	20
D6	20
D7	20
D8	20
D9	20
D10	20
D11	20
D12	20
E1	20	5608.19	3232.08
E2	20	6048.33	2466.1
E3	20	6009.07	2500.36
E4	20	2666.45	3135.97
E5	20	3463.91	2234.93
E6	20	3823.65	2577.81
E7	20	5584.46	1879.02
E8	20	6153.5	2386.83
E9	20	6491.65	2337.62
E10	20	3812.67	2318.52
E11	20	3765.66	2172.52
E12	20	3566.4	2137.04
F1	20	5108.95	2693.63
F2	20	5424.89	2623.53
F3	20	5963.22	2543.36
F4	20	11999.1	2445.87
F5	20	14467.1	2611.6
F6	20	13833.5	2243.36
F7	20	3444.25	2795.28
F8	20	4069.05	3123.92
F9	20	3750.58	2642.32
F10	20		4136.3	3311.08
F11	20		3419.64	3766.52
F12	20		2979.62	5126.77
G1	20	6032.11	2947.56
G2	20	6281.98	2735.54
G3	20	7210.85	2880.66
G4	20	3120.06	3191.17
G5	20	3304.48	2548.81
G6	20	3556.22	2430.33
G7	20	6129.26	2621.62
G8	20	6049.76	2360.01
G9	20	6364.01	2412.02
G10	20	3860.47	2238.93
G11	20	3520.12	2104.82
G12	20	3556.78	2199.34
H1	20	4695.58	2275.67
H2	20	4901.88	2329.38
H3	20	5561.68	2841.13
H4	20	14037.6	2251.82
H5	20	11364.4	1949.1
H6	20	7484.94	1755.34
H7	20	4577.04	2491.17
H8	20	4633.94	2671.87
H9	20	4778.75	2046.99
H10	20		3527.65	4601.28
H11	20		3208.56	5211.47
H12	20		3067.13	5740.97
A1	21	4386.91	3041.36
A2	21	4664.28	3199.41
A3	21	5561.79	3162.06
A4	21	2301.87	3535.21
A5	21	2303.16	3486.24
A6	21	2193.77	3448.88
A7	21	4282.38	2762.4
A8	21	4984.71	2485.79
A9	21	5703.66	2528.84
A10	21	3567.96	2967.62
A11	21	2894.44	2533.24
A12	21	3692.19	2909.63
B1	21	3229.45	2943.68
B2	21	4606.26	2959.55
B3	21	5434.68	3237.94
B4	21	5438.2	4823.94
B5	21	11424.2	3189.12
B6	21	13233.4	3412.84
B7	21	1175.1	4871.41
B8	21	2906.87	3781.95
B9	21	2232.88	3831.02
B10	21		4830.32	2263.58
B11	21		3191.7	4777.39
B12	21		4260.23	3022.52
C1	21
C2	21
C3	21
C4	21
C5	21
C6	21
C7	21
C8	21
C9	21
C10	21
C11	21
C12	21
D1	21
D2	21
D3	21
D4	21
D5	21
D6	21
D7	21
D8	21
D9	21
D10	21
D11	21
D12	21
E1	21	5655.27	3234.76
E2	21	6088.31	2474.17
E3	21	6005.55	2483.47
E4	21	2699.52	3116.39
E5	21	3497	2249.41
E6	21	3867.15	2589.07
E7	21	5601.07	1919.35
E8	21	6187.19	2389.71
E9	21	6512.46	2335.81
E10	21	3844	2315.48
E11	21	3825.79	2196.27
E12	21	3590.52	2159.16
F1	21	5134.83	2699.9
F2	21	5493.41	2645.67
F3	21	5971.57	2529.51
F4	21	12114.7	2446.25
F5	21	14685.3	2642.82
F6	21	13944.2	2250.53
F7	21	3451.32	2776.13
F8	21	4095.11	3124.54
F9	21	3785.45	2652.7
F10	21		4120.28	3439.29
F11	21		3451.16	3870.27
F12	21		2976.42	5207.83
G1	21	5999.15	2914.55
[truncated: 1,847 more rows]

## Sheet: Amplification Data
Block Type	96well
Chemistry	TAQMAN
Experiment File Name	C:\Users\SamanthaK\Desktop\ForChecking\SK10072014_1.eds
Experiment Run End Time	Not Started
Instrument Type	steponeplus
Passive Reference	ROX
Well	Cycle	Target Name	Rn	ΔRn
A1	1	Target 1	1.40203	0
A1	2	Target 1	1.42175	0.0197139
A1	3	Target 1	1.43639	0.0343595
A1	4	Target 1	1.4339	0.0318723
A1	5	Target 1	1.43235	0.030322
A1	6	Target 1	1.43648	0.0344493
A1	7	Target 1	1.42798	0.025944
A1	8	Target 1	1.43159	0.0295594
A1	9	Target 1	1.44379	0.0417603
A1	10	Target 1	1.43365	0.0316148
A1	11	Target 1	1.44789	0.0458615
A1	12	Target 1	1.44723	0.0451983
A1	13	Target 1	1.43837	0.0363333
A1	14	Target 1	1.44176	0.0397297
A1	15	Target 1	1.43092	0.028886
A1	16	Target 1	1.44036	0.038327
A1	17	Target 1	1.43307	0.0310373
A1	18	Target 1	1.43999	0.0379618
A1	19	Target 1	1.43474	0.0327063
A1	20	Target 1	1.43767	0.0356362
A1	21	Target 1	1.44242	0.0403837
A1	22	Target 1	1.44376	0.0417298
A1	23	Target 1	1.46008	0.0580496
A1	24	Target 1	1.46873	0.0666963
A1	25	Target 1	1.49232	0.0902869
A1	26	Target 1	1.55661	0.154577
A1	27	Target 1	1.68249	0.280459
A1	28	Target 1	1.8807	0.478666
A1	29	Target 1	2.19083	0.788799
A1	30	Target 1	2.5468	1.14477
A1	31	Target 1	2.95488	1.55285
A1	32	Target 1	3.34659	1.94456
A1	33	Target 1	3.711	2.30896
A1	34	Target 1	4.05622	2.65418
A1	35	Target 1	4.33328	2.93125
A1	36	Target 1	4.57599	3.17395
A1	37	Target 1	4.78431	3.38228
A1	38	Target 1	4.95354	3.55151
A1	39	Target 1	5.11853	3.7165
A1	40	Target 1	5.24545	3.84342
A2	1	Target 1	1.39898	0
A2	2	Target 1	1.41377	0.0147855
A2	3	Target 1	1.42708	0.0281039
A2	4	Target 1	1.43599	0.03701
A2	5	Target 1	1.44087	0.0418867
A2	6	Target 1	1.4417	0.0427234
A2	7	Target 1	1.44437	0.0453941
A2	8	Target 1	1.44383	0.0448484
A2	9	Target 1	1.44689	0.047907
A2	10	Target 1	1.44536	0.046381
A2	11	Target 1	1.45691	0.0579309
A2	12	Target 1	1.44935	0.0503716
A2	13	Target 1	1.44536	0.0463833
A2	14	Target 1	1.45196	0.0529816
A2	15	Target 1	1.44901	0.0500301
A2	16	Target 1	1.4517	0.0527235
A2	17	Target 1	1.44667	0.0476911
A2	18	Target 1	1.44807	0.0490924
A2	19	Target 1	1.45806	0.0590806
A2	20	Target 1	1.45526	0.0562845
A2	21	Target 1	1.45786	0.058879
A2	22	Target 1	1.45789	0.0589073
A2	23	Target 1	1.46497	0.0659894
A2	24	Target 1	1.47658	0.0775954
A2	25	Target 1	1.50485	0.105872
A2	26	Target 1	1.54976	0.150776
A2	27	Target 1	1.65317	0.254186
A2	28	Target 1	1.83756	0.438577
A2	29	Target 1	2.12329	0.724308
A2	30	Target 1	2.47257	1.07359
A2	31	Target 1	2.87027	1.47129
A2	32	Target 1	3.25695	1.85797
A2	33	Target 1	3.62591	2.22693
A2	34	Target 1	3.9727	2.57372
A2	35	Target 1	4.27094	2.87196
A2	36	Target 1	4.52224	3.12326
A2	37	Target 1	4.76086	3.36188
A2	38	Target 1	4.94204	3.54306
A2	39	Target 1	5.09564	3.69666
A2	40	Target 1	5.20477	3.80579
A3	1	Target 1	1.72784	0
A3	2	Target 1	1.74406	0.0162185
A3	3	Target 1	1.76395	0.0361122
A3	4	Target 1	1.76974	0.041904
A3	5	Target 1	1.77146	0.0436201
A3	6	Target 1	1.76989	0.0420526
A3	7	Target 1	1.76531	0.0374651
A3	8	Target 1	1.77373	0.0458871
A3	9	Target 1	1.76799	0.0401497
A3	10	Target 1	1.76961	0.0417706
A3	11	Target 1	1.76928	0.0414352
A3	12	Target 1	1.77345	0.0456085
A3	13	Target 1	1.76181	0.0339656
A3	14	Target 1	1.75765	0.0298101
A3	15	Target 1	1.76597	0.0381269
A3	16	Target 1	1.76116	0.0333234
A3	17	Target 1	1.75973	0.031894
A3	18	Target 1	1.7714	0.0435609
A3	19	Target 1	1.76777	0.0399277
A3	20	Target 1	1.75825	0.0304129
A3	21	Target 1	1.75891	0.0310737
A3	22	Target 1	1.77927	0.051429
A3	23	Target 1	1.77247	0.0446304
A3	24	Target 1	1.79311	0.0652732
A3	25	Target 1	1.79942	0.0715799
A3	26	Target 1	1.84533	0.117494
A3	27	Target 1	1.92349	0.195645
A3	28	Target 1	2.07119	0.343345
A3	29	Target 1	2.34994	0.622103
A3	30	Target 1	2.72872	1.00088
A3	31	Target 1	3.1607	1.43286
A3	32	Target 1	3.60304	1.8752
A3	33	Target 1	4.04309	2.31525
A3	34	Target 1	4.47266	2.74482
A3	35	Target 1	4.78832	3.06048
A3	36	Target 1	5.17825	3.45041
A3	37	Target 1	5.46923	3.74139
A3	38	Target 1	5.73467	4.00683
A3	39	Target 1	5.93942	4.21158
A3	40	Target 1	6.09345	4.36561
A7	1	Target 3	1.53176	0
A7	2	Target 3	1.53466	0.00289845
A7	3	Target 3	1.54736	0.0155994
A7	4	Target 3	1.54902	0.0172578
A7	5	Target 3	1.55323	0.021462
A7	6	Target 3	1.56135	0.0295849
A7	7	Target 3	1.55851	0.0267445
A7	8	Target 3	1.5539	0.0221359
A7	9	Target 3	1.5555	0.0237347
A7	10	Target 3	1.5469	0.0151385
A7	11	Target 3	1.55078	0.0190169
A7	12	Target 3	1.55066	0.0188931
A7	13	Target 3	1.54933	0.0175699
A7	14	Target 3	1.54743	0.0156627
A7	15	Target 3	1.55644	0.0246707
A7	16	Target 3	1.55128	0.0195198
A7	17	Target 3	1.55299	0.0212275
A7	18	Target 3	1.54638	0.0146146
A7	19	Target 3	1.55649	0.0247247
A7	20	Target 3	1.55533	0.023566
A7	21	Target 3	1.55024	0.0184759
A7	22	Target 3	1.55116	0.0193962
A7	23	Target 3	1.56148	0.0297126
A7	24	Target 3	1.56707	0.0353062
A7	25	Target 3	1.5842	0.052434
A7	26	Target 3	1.61618	0.0844193
A7	27	Target 3	1.66541	0.133647
A7	28	Target 3	1.73965	0.207888
A7	29	Target 3	1.86612	0.33436
A7	30	Target 3	2.05161	0.519843
A7	31	Target 3	2.27374	0.741978
A7	32	Target 3	2.54291	1.01114
A7	33	Target 3	2.80157	1.26981
A7	34	Target 3	3.10376	1.572
A7	35	Target 3	3.37087	1.8391
A7	36	Target 3	3.66272	2.13095
A7	37	Target 3	3.9521	2.42034
A7	38	Target 3	4.12714	2.59538
A7	39	Target 3	4.34227	2.81051
A7	40	Target 3	4.52151	2.98975
A8	1	Target 3	1.97379	0
A8	2	Target 3	1.99141	0.0176189
A8	3	Target 3	1.98492	0.0111282
A8	4	Target 3	2	0.0262161
A8	5	Target 3	1.99369	0.0199044
A8	6	Target 3	1.9952	0.0214095
A8	7	Target 3	1.9989	0.0251157
A8	8	Target 3	2.00354	0.0297529
A8	9	Target 3	1.98824	0.0144573
A8	10	Target 3	2.00529	0.0314993
A8	11	Target 3	1.99652	0.0227323
A8	12	Target 3	1.9959	0.0221086
A8	13	Target 3	1.98193	0.00813842
A8	14	Target 3	1.98397	0.0101838
A8	15	Target 3	1.98707	0.0132838
A8	16	Target 3	2.00135	0.0275627
A8	17	Target 3	1.99574	0.0219512
A8	18	Target 3	1.99081	0.0170183
A8	19	Target 3	1.99406	0.0202684
A8	20	Target 3	1.99122	0.0174291
A8	21	Target 3	2.00528	0.0314904
A8	22	Target 3	2.01059	0.0368041
A8	23	Target 3	2.0322	0.0584146
A8	24	Target 3	2.05449	0.0807027
A8	25	Target 3	2.10865	0.134867
A8	26	Target 3	2.16985	0.196064
A8	27	Target 3	2.31155	0.337765
A8	28	Target 3	2.49047	0.516685
A8	29	Target 3	2.75264	0.778852
A8	30	Target 3	3.04923	1.07545
A8	31	Target 3	3.3777	1.40391
A8	32	Target 3	3.72277	1.74898
A8	33	Target 3	4.05718	2.0834
A8	34	Target 3	4.40432	2.43053
A8	35	Target 3	4.72069	2.74691
A8	36	Target 3	5.00292	3.02913
A8	37	Target 3	5.26986	3.29608
A8	38	Target 3	5.50359	3.52981
A8	39	Target 3	5.71683	3.74305
A8	40	Target 3	5.87883	3.90504
A9	1	Target 3	2.20546	0
A9	2	Target 3	2.21938	0.0139184
A9	3	Target 3	2.2307	0.025243
A9	4	Target 3	2.236	0.0305409
A9	5	Target 3	2.2381	0.0326443
A9	6	Target 3	2.21776	0.0123022
A9	7	Target 3	2.22796	0.0224988
A9	8	Target 3	2.22326	0.0177975
A9	9	Target 3	2.23045	0.0249906
A9	10	Target 3	2.23059	0.0251353
A9	11	Target 3	2.22888	0.0234177
A9	12	Target 3	2.2328	0.0273442
A9	13	Target 3	2.22508	0.0196173
A9	14	Target 3	2.23318	0.0277233
A9	15	Target 3	2.25707	0.0516129
A9	16	Target 3	2.24312	0.0376608
A9	17	Target 3	2.23838	0.0329232
A9	18	Target 3	2.2356	0.0301414
A9	19	Target 3	2.24011	0.0346472
A9	20	Target 3	2.24805	0.0425897
A9	21	Target 3	2.25545	0.0499904
A9	22	Target 3	2.24481	0.0393529
A9	23	Target 3	2.27102	0.065558
A9	24	Target 3	2.30005	0.094593
A9	25	Target 3	2.37641	0.170945
A9	26	Target 3	2.46558	0.260116
A9	27	Target 3	2.61532	0.40986
A9	28	Target 3	2.88692	0.681461
A9	29	Target 3	3.20065	0.99519
A9	30	Target 3	3.59096	1.3855
A9	31	Target 3	3.95214	1.74668
A9	32	Target 3	4.3336	2.12815
A9	33	Target 3	4.71406	2.50861
A9	34	Target 3	5.10318	2.89772
A9	35	Target 3	5.47918	3.27372
A9	36	Target 3	5.76426	3.5588
A9	37	Target 3	6.04454	3.83909
A9	38	Target 3	6.2689	4.06344
A9	39	Target 3	6.49597	4.29051
A9	40	Target 3	6.69354	4.48808
E1	1	Target 1	1.69712	0
E1	2	Target 1	1.71747	0.0203453
E1	3	Target 1	1.72742	0.0302988
E1	4	Target 1	1.71875	0.021625
E1	5	Target 1	1.73556	0.0384399
E1	6	Target 1	1.73058	0.0334529
E1	7	Target 1	1.73766	0.0405378
E1	8	Target 1	1.72557	0.0284473
E1	9	Target 1	1.7284	0.0312806
E1	10	Target 1	1.73154	0.0344199
E1	11	Target 1	1.73008	0.032957
E1	12	Target 1	1.73943	0.0423042
E1	13	Target 1	1.728	0.0308731
E1	14	Target 1	1.72731	0.0301871
E1	15	Target 1	1.7345	0.0373806
E1	16	Target 1	1.73664	0.0395111
E1	17	Target 1	1.72979	0.0326666
E1	18	Target 1	1.7287	0.0315784
E1	19	Target 1	1.73201	0.0348899
E1	20	Target 1	1.73516	0.0380402
E1	21	Target 1	1.74828	0.0511584
E1	22	Target 1	1.75473	0.0576086
E1	23	Target 1	1.7865	0.0893711
E1	24	Target 1	1.82515	0.128024
E1	25	Target 1	1.93446	0.237333
E1	26	Target 1	2.13905	0.441921
E1	27	Target 1	2.45871	0.761591
E1	28	Target 1	2.87453	1.1774
E1	29	Target 1	3.37047	1.67334
E1	30	Target 1	3.84546	2.14833
E1	31	Target 1	4.291	2.59388
E1	32	Target 1	4.73862	3.04149
E1	33	Target 1	5.09762	3.40049
E1	34	Target 1	5.45458	3.75745
E1	35	Target 1	5.68062	3.9835
E1	36	Target 1	5.92381	4.22669
E1	37	Target 1	6.11685	4.41973
E1	38	Target 1	6.28484	4.58772
E1	39	Target 1	6.38405	4.68692
E1	40	Target 1	6.47345	4.77633
E2	1	Target 1	2.43949	0
E2	2	Target 1	2.47269	0.0331995
E2	3	Target 1	2.46273	0.023237
E2	4	Target 1	2.45611	0.0166142
E2	5	Target 1	2.44962	0.0101237
E2	6	Target 1	2.46	0.0205076
E2	7	Target 1	2.45642	0.0169215
E2	8	Target 1	2.45719	0.0177
E2	9	Target 1	2.45165	0.012156
E2	10	Target 1	2.46366	0.0241699
E2	11	Target 1	2.45143	0.0119326
E2	12	Target 1	2.44861	0.00911951
E2	13	Target 1	2.45469	0.0151935
E2	14	Target 1	2.45433	0.0148406
E2	15	Target 1	2.45492	0.0154257
E2	16	Target 1	2.44674	0.00724411
E2	17	Target 1	2.43888	-0.000614882
E2	18	Target 1	2.4596	0.0201101
E2	19	Target 1	2.44309	0.00359559
E2	20	Target 1	2.45259	0.013098
E2	21	Target 1	2.46074	0.0212498
E2	22	Target 1	2.46464	0.0251498
E2	23	Target 1	2.50726	0.0677645
E2	24	Target 1	2.55701	0.117515
E2	25	Target 1	2.64975	0.210255
E2	26	Target 1	2.87663	0.437135
E2	27	Target 1	3.26126	0.821766
E2	28	Target 1	3.7809	1.3414
E2	29	Target 1	4.41235	1.97286
E2	30	Target 1	5.07317	2.63367
E2	31	Target 1	5.66778	3.22828
E2	32	Target 1	6.30072	3.86122
E2	33	Target 1	6.80282	4.36332
E2	34	Target 1	7.28444	4.84494
E2	35	Target 1	7.70249	5.26299
E2	36	Target 1	8.05595	5.61645
E2	37	Target 1	8.36812	5.92863
E2	38	Target 1	8.60402	6.16452
E2	39	Target 1	8.74789	6.30839
E2	40	Target 1	8.88045	6.44095
E3	1	Target 1	2.37796	0
E3	2	Target 1	2.41644	0.0384858
E3	3	Target 1	2.42359	0.0456305
E3	4	Target 1	2.42843	0.050472
E3	5	Target 1	2.39449	0.0165327
E3	6	Target 1	2.41389	0.0359299
E3	7	Target 1	2.40422	0.0262623
E3	8	Target 1	2.42126	0.0433011
E3	9	Target 1	2.39898	0.0210202
E3	10	Target 1	2.41065	0.03269
E3	11	Target 1	2.40053	0.022568
E3	12	Target 1	2.3839	0.00594401
E3	13	Target 1	2.40151	0.0235469
E3	14	Target 1	2.39879	0.0208354
E3	15	Target 1	2.38161	0.00364923
E3	16	Target 1	2.39502	0.0170596
E3	17	Target 1	2.39641	0.01845
E3	18	Target 1	2.38742	0.00946569
E3	19	Target 1	2.38478	0.00682354
E3	20	Target 1	2.40328	0.0253239
E3	21	Target 1	2.41821	0.0402486
E3	22	Target 1	2.4113	0.0333405
E3	23	Target 1	2.43049	0.0525317
E3	24	Target 1	2.46607	0.088109
E3	25	Target 1	2.54851	0.170549
E3	26	Target 1	2.7227	0.344738
E3	27	Target 1	3.0373	0.659344
E3	28	Target 1	3.5025	1.12455
E3	29	Target 1	4.08905	1.71109
E3	30	Target 1	4.69015	2.31219
E3	31	Target 1	5.27013	2.89217
E3	32	Target 1	5.8505	3.47254
E3	33	Target 1	6.39706	4.0191
E3	34	Target 1	6.8078	4.42984
E3	35	Target 1	7.25431	4.87635
E3	36	Target 1	7.53912	5.16116
E3	37	Target 1	7.83372	5.45576
E3	38	Target 1	8.09526	5.7173
E3	39	Target 1	8.25094	5.87298
E3	40	Target 1	8.41149	6.03354
E7	1	Target 3	2.90506	0
E7	2	Target 3	2.87532	-0.029736
E7	3	Target 3	2.90337	-0.00168085
E7	4	Target 3	2.91219	0.00713372
E7	5	Target 3	2.87745	-0.0276067
E7	6	Target 3	2.89963	-0.00542736
E7	7	Target 3	2.91119	0.0061388
E7	8	Target 3	2.90118	-0.00387979
E7	9	Target 3	2.92745	0.0223908
E7	10	Target 3	2.93887	0.0338178
E7	11	Target 3	2.90842	0.00336647
E7	12	Target 3	2.91067	0.00561357
E7	13	Target 3	2.93017	0.0251126
E7	14	Target 3	2.90382	-0.00123239
E7	15	Target 3	2.92189	0.01683
E7	16	Target 3	2.92929	0.0242348
E7	17	Target 3	2.94082	0.0357678
E7	18	Target 3	2.90197	-0.00308871
E7	19	Target 3	2.94954	0.0444887
E7	20	Target 3	2.97201	0.0669551
E7	21	Target 3	2.91821	0.01315
E7	22	Target 3	2.9564	0.0513418
E7	23	Target 3	2.97537	0.0703161
E7	24	Target 3	3.01061	0.105552
E7	25	Target 3	3.11487	0.209811
E7	26	Target 3	3.25463	0.349571
E7	27	Target 3	3.49914	0.594085
E7	28	Target 3	3.80413	0.899072
E7	29	Target 3	4.18798	1.28292
E7	30	Target 3	4.70647	1.80141
E7	31	Target 3	5.2343	2.32925
E7	32	Target 3	5.89622	2.99117
E7	33	Target 3	6.51083	3.60578
E7	34	Target 3	7.09604	4.19098
E7	35	Target 3	7.56061	4.65555
E7	36	Target 3	8.09101	5.18595
E7	37	Target 3	8.56409	5.65904
E7	38	Target 3	8.90516	6.0001
E7	39	Target 3	9.2643	6.35924
E7	40	Target 3	9.41044	6.50538
E8	1	Target 3	2.52886	0
E8	2	Target 3	2.56185	0.0329905
E8	3	Target 3	2.57643	0.0475726
E8	4	Target 3	2.56959	0.0407276
E8	5	Target 3	2.5653	0.0364382
E8	6	Target 3	2.57621	0.0473499
E8	7	Target 3	2.57555	0.0466964
E8	8	Target 3	2.56693	0.0380726
E8	9	Target 3	2.57902	0.0501673
E8	10	Target 3	2.58847	0.059612
E8	11	Target 3	2.57585	0.0469875
E8	12	Target 3	2.56157	0.0327132
E8	13	Target 3	2.58748	0.0586255
E8	14	Target 3	2.58008	0.0512242
E8	15	Target 3	2.58	0.0511379
E8	16	Target 3	2.56604	0.0371826
E8	17	Target 3	2.57283	0.0439689
E8	18	Target 3	2.57471	0.0458572
E8	19	Target 3	2.57627	0.0474129
E8	20	Target 3	2.57811	0.049253
E8	21	Target 3	2.5891	0.06024
E8	22	Target 3	2.58897	0.0601165
E8	23	Target 3	2.61307	0.0842094
E8	24	Target 3	2.65469	0.125835
E8	25	Target 3	2.69505	0.166197
E8	26	Target 3	2.82774	0.298882
E8	27	Target 3	2.99731	0.468456
E8	28	Target 3	3.29615	0.767295
E8	29	Target 3	3.62765	1.09879
E8	30	Target 3	4.00258	1.47372
E8	31	Target 3	4.38695	1.85809
E8	32	Target 3	4.85941	2.33055
E8	33	Target 3	5.26814	2.73929
E8	34	Target 3	5.70695	3.17809
E8	35	Target 3	6.08187	3.55301
E8	36	Target 3	6.43204	3.90318
E8	37	Target 3	6.76124	4.23239
E8	38	Target 3	7.04598	4.51712
E8	39	Target 3	7.24933	4.72048
E8	40	Target 3	7.4215	4.89265
E9	1	Target 3	2.73582	0
E9	2	Target 3	2.7479	0.0120752
E9	3	Target 3	2.76457	0.0287476
E9	4	Target 3	2.77247	0.0366492
E9	5	Target 3	2.7592	0.0233729
E9	6	Target 3	2.75439	0.0185645
E9	7	Target 3	2.75732	0.0214922
E9	8	Target 3	2.77362	0.0377913
E9	9	Target 3	2.76705	0.0312297
E9	10	Target 3	2.75763	0.0218048
E9	11	Target 3	2.76785	0.0320215
E9	12	Target 3	2.76395	0.0281246
E9	13	Target 3	2.76665	0.0308268
E9	14	Target 3	2.78963	0.0538039
E9	15	Target 3	2.78501	0.0491824
E9	16	Target 3	2.7665	0.0306714
E9	17	Target 3	2.75261	0.016788
E9	18	Target 3	2.76441	0.0285816
E9	19	Target 3	2.76416	0.0283391
E9	20	Target 3	2.77704	0.0412138
E9	21	Target 3	2.78809	0.0522707
E9	22	Target 3	2.77074	0.034915
E9	23	Target 3	2.79617	0.0603416
E9	24	Target 3	2.82611	0.0902824
E9	25	Target 3	2.88614	0.15032
E9	26	Target 3	2.9996	0.263777
E9	27	Target 3	3.20401	0.468184
E9	28	Target 3	3.48933	0.753508
E9	29	Target 3	3.92623	1.19041
E9	30	Target 3	4.33847	1.60264
E9	31	Target 3	4.76162	2.0258
E9	32	Target 3	5.2263	2.49048
E9	33	Target 3	5.65288	2.91706
E9	34	Target 3	6.12159	3.38577
E9	35	Target 3	6.53793	3.80211
E9	36	Target 3	6.9155	4.17968
E9	37	Target 3	7.26398	4.52816
E9	38	Target 3	7.53242	4.79659
E9	39	Target 3	7.81566	5.07983
E9	40	Target 3	8.13125	5.39543

## Sheet: BioGroup Analysis Result
Block Type	96well
Chemistry	TAQMAN
Experiment File Name	C:\Users\SamanthaK\Desktop\ForChecking\SK10072014_1.eds
Experiment Run End Time	Not Started
Instrument Type	steponeplus
Passive Reference	ROX
Biogroup Name	Target Name	Task	RQ	RQ Min	RQ Max	Cт Mean	ΔCт Mean	ΔCт SE	ΔΔCт
Analysis Type	Singleplex
Endogenous Control	Target 1
RQ Min/Max Confidence Level	95.0
Reference Biogroup Name

## Sheet: Technical Analysis Result
Block Type	96well
Chemistry	TAQMAN
Experiment File Name	C:\Users\SamanthaK\Desktop\ForChecking\SK10072014_1.eds
Experiment Run End Time	Not Started
Instrument Type	steponeplus
Passive Reference	ROX
Sample Name	Target Name	Task	RQ	RQ Min	RQ Max	Cт Mean	ΔCт Mean	ΔCт SE	ΔΔCт
1B-1	Target 1	UNKNOWN				28.557
1B-1	Target 2	UNKNOWN	1	0.436432	2.29131	26.9859	-1.57113	0.430828	0
1B-1	Target 3	UNKNOWN	1	0.213835	4.67651	28.3336	-0.223413	0.80154	0
1B-1	Target 4	UNKNOWN	1	0.535333	1.868	28.4259	-0.131141	0.324693	0
1B-1	Target 5	UNKNOWN	1	0.620534	1.61152	27.5777	-0.979301	0.24795	0
1B-1	Target 6	UNKNOWN	1			18.6796	-9.87746		0
1B-1	Target 7	UNKNOWN	1	0.73638	1.358	24.4051	-4.15192	0.159009	0
1B-1	Target 8	UNKNOWN	1	0.105206	9.50518	7.26374	-21.2933	1.1701	0
2B-1	Target 1	UNKNOWN				26.5308
2B-1	Target 2	UNKNOWN	1.10628	0.764174	1.60154	24.8139	-1.71684	0.19224	-0.145717
2B-1	Target 3	UNKNOWN	0.668209	0.468451	0.953149	26.889	0.358215	0.184553	0.581628
2B-1	Target 4	UNKNOWN	0.937738	0.431876	2.03612	26.4924	-0.0383981	0.402878	0.0927429
2B-1	Target 5	UNKNOWN	0.881888	0.389283	1.99784	25.7328	-0.797968	0.424924	0.181333
2B-1	Target 6	UNKNOWN
2B-1	Target 7	UNKNOWN	0.673688	0.171413	2.64774	22.9487	-3.58207	0.7112	0.569846
2B-1	Target 8	UNKNOWN	0.0798097	7.20799e-05	88.3685	8.88481	-17.646	3.64234	3.64729
	Target 1	NTC
	Target 2	NTC
	Target 3	NTC
	Target 4	NTC
	Target 5	NTC
	Target 6	NTC
	Target 7	NTC
	Target 8	NTC
Analysis Type	Singleplex
Endogenous Control	Target 1
RQ Min/Max Confidence Level	95.0
Reference Sample	1B-1
