# Supplementary material for: qPCR multiplex detection of microRNA and messenger RNA in a single reaction
Source: PeerJ. 2020 Jun 25;8:e9004. doi: 10.7717/peerj.9004 (PMC7321665; doi:10.7717/peerj.9004)
Supplement: Supplemental Information 14 [file peerj-08-9004-s014.xls]

## Sheet: Amplification Data_1_compact
Analysis of Real Time PCR data	version:2016.1	WoL: amplicon group				Chemistry: hydrolysis probe	N0 = threshold /(Eff_mean^Cq)			LEGEND
analysis date:9/08/2016		points in WoL: 4				Input: ss-cDNA
Input Sheet: Amplification Data		Thresholds: group								Sample Use:
name	indiv_PCR_eff	Amplicon	Sample Name	threshold	mean_PCR_eff	Cq	N0	Sample_Use	Quality_checks	1: used for W-o-L setting
A4_P53	1.7778	P53 Mixed 60 min	1a2a3a - Mixed 60 min	0.068	1.77573	22.7367	1.45373e-07	1 2 3	0 - - - - - - - - - - - - -	2: contributes to mean PCR efficiency
A5_P53	1.6782	P53 Mixed 60 min	1a2a3a - Mixed 60 min	0.068	1.77573	23.7083	8.32119e-08	1 0 3	- - - - - 5 6 - - - - - - -	3: N0 value calculated
A6_P53	1.72961	P53 Mixed 60 min	1a2a3a - Mixed 60 min	0.068	1.77573	22.7884	1.41123e-07	1 2 3	0 - - - - - - - - - - - - -	0: not used / calculated
A7_P53	1.74102	P53 Mixed 60 min	1a2a3a - Mixed 60 min	0.068	1.77573	23.0696	1.2008e-07	1 2 3	0 - - - - - - - - - - - - -
A8_P53	1.68753	P53 Mixed 60 min	1a2a3a - Mixed 60 min	0.068	1.77573	22.9933	1.25462e-07	1 0 3	- - - - - 5 6 - - - - - - -	Quality Checks:
A9_P53	1.81969	P53 Mixed 60 min	1a2a3a - Mixed 60 min	0.068	1.77573	23.5529	9.09825e-08	1 2 3	0 - - - - - - - - - - - - -	0: passed all checks
A10_P53	1.77611	P53 Mixed 60 min	1a2a3a - Mixed 60 min	0.068	1.77573	22.8514	1.36112e-07	1 2 3	0 - - - - - - - - - - - - -	1: no amplification
A11_P53	1.89241	P53 Mixed 60 min	1a2a3a - Mixed 60 min	0.068	1.77573	23.4166	9.83854e-08	1 0 3	- - - - - 5 6 - - - - - - -	2: baseline error
A12_P53	1.81016	P53 Mixed 60 min	1a2a3a - Mixed 60 min	0.068	1.77573	24.3142	5.87617e-08	1 2 3	0 - - - - - - - - - - - - -	3: no plateau
B4_P53	1.66888	P53 mixed 120 min	345 - mixed 120 min	0.1595	1.74446	23.2662	3.80367e-07	1 0 3	- - - - - 5 6 - - - - - - -	4: noisy sample
B5_P53	1.83586	P53 mixed 120 min	345 - mixed 120 min	0.1595	1.74446	24.59	1.82098e-07	1 0 3	- - - - - 5 6 - - - - - - -	5: PCR efficiency outside 5%
B6_P53	1.74446	P53 mixed 120 min	345 - mixed 120 min	0.1595	1.74446	23.8814	2.70119e-07	1 2 3	0 - - - - - - - - - - - - -	6: excluded from mean Eff
B7_P53	1.7302	P53 mixed 120 min	345 - mixed 120 min	0.1595	1.74446	23.621	-999	0 0 0	- - 2 - - - 6 - - - - - - -	7: excluded by user
B8_P53	1.66735	P53 mixed 120 min	345 - mixed 120 min	0.1595	1.74446	23.9566	2.59046e-07	1 0 3	- - - - - 5 6 - - - - - - -	8: included by user
B9_P53	1.83314	P53 mixed 120 min	345 - mixed 120 min	0.1595	1.74446	23.9526	-999	0 0 0	- - 2 - - 5 6 - - - - - - -	9: manual baseline
B10_P53	1.82583	P53 mixed 120 min	345 - mixed 120 min	0.1595	1.74446	24.5858	-999	0 0 0	- - 2 - - 5 6 - - - - - - -
B11_P53	1.86381	P53 mixed 120 min	345 - mixed 120 min	0.1595	1.74446	24.3852	2.04079e-07	1 0 3	- - - - - 5 6 - - - - - - -	if amplicon groups are defined the rules are applied per group
B12_P53	1.84038	P53 mixed 120 min	345 - mixed 120 min	0.1595	1.74446	24.4103	-999	0 0 0	- - 2 - - 5 6 - - - - - - -
C4_P53	1.86068	P53 random 120min	7a8a9a - random 120min	0.1815	1.85157	24.9847	-999	0 0 0	- - 2 - - - 6 - - - - - - -	User Choices:
C5_P53	1.6485	P53 random 120min	7a8a9a - random 120min	0.1815	1.85157	25.0637	3.57549e-08	1 0 3	- - - - - 5 6 - - - - - - -
C6_P53	1.85612	P53 random 120min	7a8a9a - random 120min	0.1815	1.85157	25.1808	3.32663e-08	1 2 3	0 - - - - - - - - - - - - -	Calculation of Mean Efficiency:
C7_P53	1.90992	P53 random 120min	7a8a9a - random 120min	0.1815	1.85157	26.2408	1.73146e-08	1 0 3	- - - - - 5 6 - - - - - - -	exclude <no plateau> samples
C8_P53	1.84701	P53 random 120min	7a8a9a - random 120min	0.1815	1.85157	26.1071	1.88018e-08	1 2 3	0 - - - - - - - - - - - - -	exclude <efficiency outlier> samples
C9_P53	1.72238	P53 random 120min	7a8a9a - random 120min	0.1815	1.85157	26.5714	-999	0 0 0	- - 2 - - 5 6 - - - - - - -	efficiency outlier defined as >5% from group median
C10_P53	1.91823	P53 random 120min	7a8a9a - random 120min	0.1815	1.85157	25.57	2.61751e-08	1 0 3	- - - - - 5 6 - - - - - - -	Baseline Estimation:
C11_P53	1.96554	P53 random 120min	7a8a9a - random 120min	0.1815	1.85157	25.2264	3.23457e-08	1 0 3	- - - - - 5 6 - - - - - - -	log-linear phase criterion: strictly continuous Log-linear phase
C12_P53	1.59035	P53 random 120min	7a8a9a - random 120min	0.1815	1.85157	25.2525	3.18304e-08	1 0 3	- - - - - 5 6 - - - - - - -
		1.77888
		1.81319

## Sheet: Amplification Data_1_output
Analysis of Real Time PCR data	version:2016.1	WoL: amplicon group							Chemistry: hydrolysis probe					N0 = threshold /(Eff_mean^Cq)			LEGEND
analysis date:9/08/2016		points in WoL: 4							Input: ss-cDNA
Input Sheet: Amplification Data		Thresholds: group															Sample Use:
sample	name	lower_limit	upper_limit	n_included	N0_(indiv_eff)	indiv PCR eff	R2	threshold	Cq	Baseline	Amplicon	mean_PCR_eff	Sample Name	N0_(mean eff)	Sample_Use	Quality_checks	1: used for W-o-L setting
1	A4_P53	0.0139637	0.136458	3	1.41571e-07	1.7778	0.998721	0.068	22.7367	0.131296	P53 Mixed 60 min	1.77573	1a2a3a - Mixed 60 min	1.45373e-07	1 2 3	0 - - - - - - - - - - - - -	2: contributes to mean PCR efficiency
2	A5_P53	0.0139637	0.136458	5	3.17548e-07	1.6782	0.999398	0.068	23.7083	0.032058	P53 Mixed 60 min	1.77573	1a2a3a - Mixed 60 min	8.32119e-08	1 0 3	- - - - - 5 6 - - - - - - -	3: N0 value calculated
3	A6_P53	0.0139637	0.136458	5	2.57072e-07	1.72961	0.998673	0.068	22.7884	0.201431	P53 Mixed 60 min	1.77573	1a2a3a - Mixed 60 min	1.41123e-07	1 2 3	0 - - - - - - - - - - - - -	0: not used / calculated
4	A7_P53	0.0139637	0.136458	4	1.89354e-07	1.74102	0.999152	0.068	23.0696	0.138808	P53 Mixed 60 min	1.77573	1a2a3a - Mixed 60 min	1.2008e-07	1 2 3	0 - - - - - - - - - - - - -
5	A8_P53	0.0139637	0.136458	5	4.0482e-07	1.68753	0.99798	0.068	22.9933	0.207898	P53 Mixed 60 min	1.77573	1a2a3a - Mixed 60 min	1.25462e-07	1 0 3	- - - - - 5 6 - - - - - - -	Quality Checks:
6	A9_P53	0.0139637	0.136458	3	5.11459e-08	1.81969	0.999843	0.068	23.5529	0.0969344	P53 Mixed 60 min	1.77573	1a2a3a - Mixed 60 min	9.09825e-08	1 2 3	0 - - - - - - - - - - - - -	0: passed all checks
7	A10_P53	0.0139637	0.136458	4	1.3545e-07	1.77611	0.935508	0.068	22.8514	1.28709	P53 Mixed 60 min	1.77573	1a2a3a - Mixed 60 min	1.36112e-07	1 2 3	0 - - - - - - - - - - - - -	1: no amplification
8	A11_P53	0.0139637	0.136458	4	2.21684e-08	1.89241	0.976987	0.068	23.4166	1.2923	P53 Mixed 60 min	1.77573	1a2a3a - Mixed 60 min	9.83854e-08	1 0 3	- - - - - 5 6 - - - - - - -	2: baseline error
9	A12_P53	0.0139637	0.136458	4	3.68416e-08	1.81016	0.998306	0.068	24.3142	0.705111	P53 Mixed 60 min	1.77573	1a2a3a - Mixed 60 min	5.87617e-08	1 2 3	0 - - - - - - - - - - - - -	3: no plateau
10	B4_P53	0.0335738	0.319154	3	1.06597e-06	1.66888	0.993939	0.1595	23.2662	1.59728	P53 mixed 120 min	1.74446	345 - mixed 120 min	3.80367e-07	1 0 3	- - - - - 5 6 - - - - - - -	4: noisy sample
11	B5_P53	0.0335738	0.319154	3	5.18741e-08	1.83586	0.9988	0.1595	24.59	1.69153	P53 mixed 120 min	1.74446	345 - mixed 120 min	1.82098e-07	1 0 3	- - - - - 5 6 - - - - - - -	5: PCR efficiency outside 5%
12	B6_P53	0.0335738	0.319154	4	2.70119e-07	1.74446	0.999901	0.1595	23.8814	0.633877	P53 mixed 120 min	1.74446	345 - mixed 120 min	2.70119e-07	1 2 3	0 - - - - - - - - - - - - -	6: excluded from mean Eff
13	B7_P53	0.0335738	0.319154	4	3.79021e-07	1.7302	0.999629	0.1595	23.621	0.696862	P53 mixed 120 min	1.74446	345 - mixed 120 min	-999	0 0 0	- - 2 - - - 6 - - - - - - -	7: excluded by user
14	B8_P53	0.0335738	0.319154	5	7.6512e-07	1.66735	0.994568	0.1595	23.9566	1.06848	P53 mixed 120 min	1.74446	345 - mixed 120 min	2.59046e-07	1 0 3	- - - - - 5 6 - - - - - - -	8: included by user
15	B9_P53	0.0335738	0.319154	4	7.91637e-08	1.83314	0.999256	0.1595	23.9526	1.84485	P53 mixed 120 min	1.74446	345 - mixed 120 min	-999	0 0 0	- - 2 - - 5 6 - - - - - - -	9: manual baseline
16	B10_P53	0.0335738	0.319154	3	5.95037e-08	1.82583	0.993299	0.1595	24.5858	1.62578	P53 mixed 120 min	1.74446	345 - mixed 120 min	-999	0 0 0	- - 2 - - 5 6 - - - - - - -
17	B11_P53	0.0335738	0.319154	4	4.06396e-08	1.86381	0.99992	0.1595	24.3852	1.58071	P53 mixed 120 min	1.74446	345 - mixed 120 min	2.04079e-07	1 0 3	- - - - - 5 6 - - - - - - -	if amplicon groups are defined the rules are applied per group
18	B12_P53	0.0335738	0.319154	4	5.44861e-08	1.84038	0.997645	0.1595	24.4103	1.52551	P53 mixed 120 min	1.74446	345 - mixed 120 min	-999	0 0 0	- - 2 - - 5 6 - - - - - - -
19	C4_P53	0.0331894	0.363078	4	3.32061e-08	1.86068	0.999871	0.1815	24.9847	2.08305	P53 random 120min	1.85157	7a8a9a - random 120min	-999	0 0 0	- - 2 - - - 6 - - - - - - -	User Choices:
20	C5_P53	0.0331894	0.363078	4	6.5733e-07	1.6485	0.999261	0.1815	25.0637	2.09921	P53 random 120min	1.85157	7a8a9a - random 120min	3.57549e-08	1 0 3	- - - - - 5 6 - - - - - - -
21	C6_P53	0.0331894	0.363078	4	3.12696e-08	1.85612	0.998528	0.1815	25.1808	2.10677	P53 random 120min	1.85157	7a8a9a - random 120min	3.32663e-08	1 2 3	0 - - - - - - - - - - - - -	Calculation of Mean Efficiency:
22	C7_P53	0.0331894	0.363078	3	7.67035e-09	1.90992	0.999051	0.1815	26.2408	2.10457	P53 random 120min	1.85157	7a8a9a - random 120min	1.73146e-08	1 0 3	- - - - - 5 6 - - - - - - -	exclude <no plateau> samples
23	C8_P53	0.0331894	0.363078	4	2.00512e-08	1.84701	0.997233	0.1815	26.1071	2.05772	P53 random 120min	1.85157	7a8a9a - random 120min	1.88018e-08	1 2 3	0 - - - - - - - - - - - - -	exclude <efficiency outlier> samples
24	C9_P53	0.0331894	0.363078	4	9.65207e-08	1.72238	0.996614	0.1815	26.5714	2.06048	P53 random 120min	1.85157	7a8a9a - random 120min	-999	0 0 0	- - 2 - - 5 6 - - - - - - -	efficiency outlier defined as >5% from group median
25	C10_P53	0.0331894	0.363078	4	1.05952e-08	1.91823	0.99297	0.1815	25.57	2.16819	P53 random 120min	1.85157	7a8a9a - random 120min	2.61751e-08	1 0 3	- - - - - 5 6 - - - - - - -	Baseline Estimation:
26	C11_P53	0.0331894	0.363078	4	7.16812e-09	1.96554	0.978969	0.1815	25.2264	2.15022	P53 random 120min	1.85157	7a8a9a - random 120min	3.23457e-08	1 0 3	- - - - - 5 6 - - - - - - -	log-linear phase criterion: strictly continuous Log-linear phase
27	C12_P53	0.0331894	0.363078	5	1.48147e-06	1.59035	0.993513	0.1815	25.2525	1.97213	P53 random 120min	1.85157	7a8a9a - random 120min	3.18304e-08	1 0 3	- - - - - 5 6 - - - - - - -
28	D4_18S	0.0304789	0.279898	27	0.0226106	1.05638	0.903934	0.14	33.2429	0.117953	18S	1.06779	1a2a3a - Mixed 60 min	-999	0 0 0	- - 2 - - - 6 - - - - - - -
29	D5_18S	0.0304789	0.279898	26	0.0234953	1.05585	0.887063	0.14	32.8428	0.113527	18S	1.06779	1a2a3a - Mixed 60 min	-999	0 0 0	- - 2 - - - 6 - - - - - - -
30	D6_18S	0.0304789	0.279898	28	0.0280149	1.0512	0.85928	0.14	32.2211	0.0851568	18S	1.06779	1a2a3a - Mixed 60 min	0.0169165	0 2 3	0 - - - - - - - - - - - - -
31	D7_18S	0.0304789	0.279898	26	0.0222604	1.05755	0.883727	0.14	32.8613	0.101841	18S	1.06779	1a2a3a - Mixed 60 min	-999	0 0 0	- - 2 - - - 6 - - - - - - -
32	D8_18S	0.0304789	0.279898	25	0.0205601	1.05708	0.89442	0.14	34.5549	0.0966323	18S	1.06779	1a2a3a - Mixed 60 min	-999	0 0 0	- - 2 - - - 6 - - - - - - -
33	D9_18S	0.0304789	0.279898	25	0.0214219	1.05635	0.889159	0.14	34.2442	0.104679	18S	1.06779	1a2a3a - Mixed 60 min	-999	0 0 0	- - 2 - - - 6 - - - - - - -
34	D10_18S	0.0304789	0.279898	22	0.0164295	1.06101	0.90385	0.14	36.1814	0.119906	18S	1.06779	1a2a3a - Mixed 60 min	-999	0 0 0	- - 2 - - - 6 - - - - - - -
35	D11_18S	0.0304789	0.279898	24	0.0181699	1.06165	0.895684	0.14	34.1295	0.102805	18S	1.06779	1a2a3a - Mixed 60 min	-999	0 0 0	- - 2 - - - 6 - - - - - - -
36	D12_18S	0.0304789	0.279898	23	0.0151354	1.06451	0.8996	0.14	35.5838	0.0999181	18S	1.06779	1a2a3a - Mixed 60 min	-999	0 0 0	- - 2 - - - 6 - - - - - - -
37	E4_18S	0.0304789	0.279898	23	0.0147551	1.06637	0.903894	0.14	35.0127	0.117653	18S	1.06779	345 - mixed 120 min	-999	0 0 0	- 1 - - - - 6 - - - - - - -
38	E5_18S	0.0304789	0.279898	23	0.0141945	1.06705	0.904472	0.14	35.2689	0.121669	18S	1.06779	345 - mixed 120 min	-999	0 0 0	- - 2 - - - 6 - - - - - - -
39	E6_18S	0.0304789	0.279898	23	0.0165363	1.06277	0.900698	0.14	35.0865	0.115816	18S	1.06779	345 - mixed 120 min	-999	0 0 0	- - 2 - - - 6 - - - - - - -
40	E7_18S	0.0304789	0.279898	24	0.0145028	1.06807	0.906161	0.14	34.4304	0.125736	18S	1.06779	345 - mixed 120 min	-999	0 0 0	- - 2 - - - 6 - - - - - - -
41	E8_18S	0.0304789	0.279898	23	0.0134748	1.06761	0.910848	0.14	35.7811	0.12133	18S	1.06779	345 - mixed 120 min	-999	0 0 0	- - 2 - - - 6 - - - - - - -
42	E9_18S	0.0304789	0.279898	23	0.0158196	1.06424	0.911235	0.14	35.0214	0.114613	18S	1.06779	345 - mixed 120 min	-999	0 0 0	- - 2 - - - 6 - - - - - - -
43	E10_18S	0.0304789	0.279898	22	0.0144568	1.06543	0.919094	0.14	35.825	0.118118	18S	1.06779	345 - mixed 120 min	-999	0 0 0	- - 2 - - - 6 - - - - - - -
44	E11_18S	0.0304789	0.279898	23	0.0142368	1.06782	0.910158	0.14	34.836	0.122069	18S	1.06779	345 - mixed 120 min	-999	0 0 0	- - 2 - - - 6 - - - - - - -
45	E12_18S	0.0304789	0.279898	22	0.0119176	1.07013	0.915879	0.14	36.3494	0.113339	18S	1.06779	345 - mixed 120 min	-999	0 0 0	- - 2 - - - 6 - - - - - - -
46	F4_18S	0.0304789	0.279898	17	0.00563534	1.08437	0.948098	0.14	39.6598	0.127273	18S	1.06779	7a8a9a - random 120min	0.0103853	1 2 3	0 - - - - - - - - - - - - -
47	F5_18S	0.0304789	0.279898	18	0.00623013	1.08383	0.934819	0.14	38.66	0.126496	18S	1.06779	7a8a9a - random 120min	-999	0 0 0	- - 2 - - - 6 - - - - - - -
48	F6_18S	0.0304789	0.279898	17	0.00724184	1.07954	0.943401	0.14	38.6979	0.130547	18S	1.06779	7a8a9a - random 120min	-999	0 0 0	- - 2 - - - 6 - - - - - - -
49	F7_18S	0.0304789	0.279898	17	0.00713623	1.08009	0.936806	0.14	38.6348	0.138769	18S	1.06779	7a8a9a - random 120min	-999	0 0 0	- - 2 - - - 6 - - - - - - -
50	F8_18S	0.0304789	0.279898	17	0.00732653	1.0794	0.938655	0.14	38.6118	0.128809	18S	1.06779	7a8a9a - random 120min	-999	0 0 0	- - 2 - - - 6 - - - - - - -
51	F9_18S	0.0304789	0.279898	18	0.00680519	1.08364	0.936224	0.14	37.6481	0.124243	18S	1.06779	7a8a9a - random 120min	-999	0 0 0	- - 2 - - - 6 - - - - - - -
52	F10_18S	0.0304789	0.279898	22	0.0116643	1.07191	0.906453	0.14	35.787	0.130688	18S	1.06779	7a8a9a - random 120min	-999	0 0 0	- - 2 - - - 6 - - - - - - -
53	F11_18S	0.0304789	0.279898	22	0.0126494	1.07037	0.90207	0.14	35.3494	0.123811	18S	1.06779	7a8a9a - random 120min	-999	0 0 0	- - 2 - - - 6 - - - - - - -
54	F12_18S	0.0304789	0.279898	22	0.0146733	1.06594	0.91212	0.14	35.3239	0.114285	18S	1.06779	7a8a9a - random 120min	-999	0 0 0	- - 2 - - - 6 - - - - - - -

## Sheet: Sample Setup (Amplicon)
Block Type	96well
Chemistry	TAQMAN
Experiment File Name	C:\Users\11193327\Downloads\SK10042014 (2).eds
Experiment Run End Time	Not Started
Instrument Type	steponeplus
Passive Reference	ROX
Well	Sample Name	Sample Color	Biogroup Name	Biogroup Color	Target Name	Target Color	Task	Reporter	Quencher	Comments
A4	1a2a3a - Mixed 60 min	RGB(132,193,241)			P53 Mixed 60 min	RGB(139,189,249)	UNKNOWN	FAM	NFQ-MGB
A5	1a2a3a - Mixed 60 min	RGB(132,193,241)			P53 Mixed 60 min	RGB(139,189,249)	UNKNOWN	FAM	NFQ-MGB
A6	1a2a3a - Mixed 60 min	RGB(132,193,241)			P53 Mixed 60 min	RGB(139,189,249)	UNKNOWN	FAM	NFQ-MGB
A7	1a2a3a - Mixed 60 min	RGB(132,193,241)			P53 Mixed 60 min	RGB(139,189,249)	UNKNOWN	FAM	NFQ-MGB
A8	1a2a3a - Mixed 60 min	RGB(132,193,241)			P53 Mixed 60 min	RGB(139,189,249)	UNKNOWN	FAM	NFQ-MGB
A9	1a2a3a - Mixed 60 min	RGB(132,193,241)			P53 Mixed 60 min	RGB(139,189,249)	UNKNOWN	FAM	NFQ-MGB
A10	1a2a3a - Mixed 60 min	RGB(132,193,241)			P53 Mixed 60 min	RGB(139,189,249)	UNKNOWN	FAM	NFQ-MGB
A11	1a2a3a - Mixed 60 min	RGB(132,193,241)			P53 Mixed 60 min	RGB(139,189,249)	UNKNOWN	FAM	NFQ-MGB
A12	1a2a3a - Mixed 60 min	RGB(132,193,241)			P53 Mixed 60 min	RGB(139,189,249)	UNKNOWN	FAM	NFQ-MGB
B4	345 - mixed 120 min	RGB(168,255,222)			P53 mixed 120 min	RGB(139,189,249)	UNKNOWN	FAM	NFQ-MGB
B5	345 - mixed 120 min	RGB(168,255,222)			P53 mixed 120 min	RGB(139,189,249)	UNKNOWN	FAM	NFQ-MGB
B6	345 - mixed 120 min	RGB(168,255,222)			P53 mixed 120 min	RGB(139,189,249)	UNKNOWN	FAM	NFQ-MGB
B7	345 - mixed 120 min	RGB(168,255,222)			P53 mixed 120 min	RGB(139,189,249)	UNKNOWN	FAM	NFQ-MGB
B8	345 - mixed 120 min	RGB(168,255,222)			P53 mixed 120 min	RGB(139,189,249)	UNKNOWN	FAM	NFQ-MGB
B9	345 - mixed 120 min	RGB(168,255,222)			P53 mixed 120 min	RGB(139,189,249)	UNKNOWN	FAM	NFQ-MGB
B10	345 - mixed 120 min	RGB(168,255,222)			P53 mixed 120 min	RGB(139,189,249)	UNKNOWN	FAM	NFQ-MGB
B11	345 - mixed 120 min	RGB(168,255,222)			P53 mixed 120 min	RGB(139,189,249)	UNKNOWN	FAM	NFQ-MGB
B12	345 - mixed 120 min	RGB(168,255,222)			P53 mixed 120 min	RGB(139,189,249)	UNKNOWN	FAM	NFQ-MGB
C4	7a8a9a - random 120min	RGB(223,221,142)			P53 random 120min	RGB(139,189,249)	UNKNOWN	FAM	NFQ-MGB
C5	7a8a9a - random 120min	RGB(223,221,142)			P53 random 120min	RGB(139,189,249)	UNKNOWN	FAM	NFQ-MGB
C6	7a8a9a - random 120min	RGB(223,221,142)			P53 random 120min	RGB(139,189,249)	UNKNOWN	FAM	NFQ-MGB
C7	7a8a9a - random 120min	RGB(223,221,142)			P53 random 120min	RGB(139,189,249)	UNKNOWN	FAM	NFQ-MGB
C8	7a8a9a - random 120min	RGB(223,221,142)			P53 random 120min	RGB(139,189,249)	UNKNOWN	FAM	NFQ-MGB
C9	7a8a9a - random 120min	RGB(223,221,142)			P53 random 120min	RGB(139,189,249)	UNKNOWN	FAM	NFQ-MGB
C10	7a8a9a - random 120min	RGB(223,221,142)			P53 random 120min	RGB(139,189,249)	UNKNOWN	FAM	NFQ-MGB
C11	7a8a9a - random 120min	RGB(223,221,142)			P53 random 120min	RGB(139,189,249)	UNKNOWN	FAM	NFQ-MGB
C12	7a8a9a - random 120min	RGB(223,221,142)			P53 random 120min	RGB(139,189,249)	UNKNOWN	FAM	NFQ-MGB
D4	1a2a3a - Mixed 60 min	RGB(132,193,241)			18S	RGB(208,243,98)	UNKNOWN	FAM	NFQ-MGB
D5	1a2a3a - Mixed 60 min	RGB(132,193,241)			18S	RGB(208,243,98)	UNKNOWN	FAM	NFQ-MGB
D6	1a2a3a - Mixed 60 min	RGB(132,193,241)			18S	RGB(208,243,98)	UNKNOWN	FAM	NFQ-MGB
D7	1a2a3a - Mixed 60 min	RGB(132,193,241)			18S	RGB(208,243,98)	UNKNOWN	FAM	NFQ-MGB
D8	1a2a3a - Mixed 60 min	RGB(132,193,241)			18S	RGB(208,243,98)	UNKNOWN	FAM	NFQ-MGB
D9	1a2a3a - Mixed 60 min	RGB(132,193,241)			18S	RGB(208,243,98)	UNKNOWN	FAM	NFQ-MGB
D10	1a2a3a - Mixed 60 min	RGB(132,193,241)			18S	RGB(208,243,98)	UNKNOWN	FAM	NFQ-MGB
D11	1a2a3a - Mixed 60 min	RGB(132,193,241)			18S	RGB(208,243,98)	UNKNOWN	FAM	NFQ-MGB
D12	1a2a3a - Mixed 60 min	RGB(132,193,241)			18S	RGB(208,243,98)	UNKNOWN	FAM	NFQ-MGB
E4	345 - mixed 120 min	RGB(168,255,222)			18S	RGB(208,243,98)	UNKNOWN	FAM	NFQ-MGB
E5	345 - mixed 120 min	RGB(168,255,222)			18S	RGB(208,243,98)	UNKNOWN	FAM	NFQ-MGB
E6	345 - mixed 120 min	RGB(168,255,222)			18S	RGB(208,243,98)	UNKNOWN	FAM	NFQ-MGB
E7	345 - mixed 120 min	RGB(168,255,222)			18S	RGB(208,243,98)	UNKNOWN	FAM	NFQ-MGB
E8	345 - mixed 120 min	RGB(168,255,222)			18S	RGB(208,243,98)	UNKNOWN	FAM	NFQ-MGB
E9	345 - mixed 120 min	RGB(168,255,222)			18S	RGB(208,243,98)	UNKNOWN	FAM	NFQ-MGB
E10	345 - mixed 120 min	RGB(168,255,222)			18S	RGB(208,243,98)	UNKNOWN	FAM	NFQ-MGB
E11	345 - mixed 120 min	RGB(168,255,222)			18S	RGB(208,243,98)	UNKNOWN	FAM	NFQ-MGB
E12	345 - mixed 120 min	RGB(168,255,222)			18S	RGB(208,243,98)	UNKNOWN	FAM	NFQ-MGB
F4	7a8a9a - random 120min	RGB(223,221,142)			18S	RGB(208,243,98)	UNKNOWN	FAM	NFQ-MGB
F5	7a8a9a - random 120min	RGB(223,221,142)			18S	RGB(208,243,98)	UNKNOWN	FAM	NFQ-MGB
F6	7a8a9a - random 120min	RGB(223,221,142)			18S	RGB(208,243,98)	UNKNOWN	FAM	NFQ-MGB
F7	7a8a9a - random 120min	RGB(223,221,142)			18S	RGB(208,243,98)	UNKNOWN	FAM	NFQ-MGB
F8	7a8a9a - random 120min	RGB(223,221,142)			18S	RGB(208,243,98)	UNKNOWN	FAM	NFQ-MGB
F9	7a8a9a - random 120min	RGB(223,221,142)			18S	RGB(208,243,98)	UNKNOWN	FAM	NFQ-MGB
F10	7a8a9a - random 120min	RGB(223,221,142)			18S	RGB(208,243,98)	UNKNOWN	FAM	NFQ-MGB
F11	7a8a9a - random 120min	RGB(223,221,142)			18S	RGB(208,243,98)	UNKNOWN	FAM	NFQ-MGB
F12	7a8a9a - random 120min	RGB(223,221,142)			18S	RGB(208,243,98)	UNKNOWN	FAM	NFQ-MGB

## Sheet: Sample Setup
Block Type	96well
Chemistry	TAQMAN
Experiment File Name	C:\Users\11193327\Downloads\SK10042014 (2).eds
Experiment Run End Time	Not Started
Instrument Type	steponeplus
Passive Reference	ROX
Well	Sample Name	Sample Color	Biogroup Name	Biogroup Color	Target Name	Target Color	Task	Reporter	Quencher	Comments
A4	1a2a3a - Mixed 60 min	RGB(132,193,241)			P53	RGB(139,189,249)	UNKNOWN	FAM	NFQ-MGB
A5	1a2a3a - Mixed 60 min	RGB(132,193,241)			P53	RGB(139,189,249)	UNKNOWN	FAM	NFQ-MGB
A6	1a2a3a - Mixed 60 min	RGB(132,193,241)			P53	RGB(139,189,249)	UNKNOWN	FAM	NFQ-MGB
A7	1a2a3a - Mixed 60 min	RGB(132,193,241)			P53	RGB(139,189,249)	UNKNOWN	FAM	NFQ-MGB
A8	1a2a3a - Mixed 60 min	RGB(132,193,241)			P53	RGB(139,189,249)	UNKNOWN	FAM	NFQ-MGB
A9	1a2a3a - Mixed 60 min	RGB(132,193,241)			P53	RGB(139,189,249)	UNKNOWN	FAM	NFQ-MGB
A10	1a2a3a - Mixed 60 min	RGB(132,193,241)			P53	RGB(139,189,249)	UNKNOWN	FAM	NFQ-MGB
A11	1a2a3a - Mixed 60 min	RGB(132,193,241)			P53	RGB(139,189,249)	UNKNOWN	FAM	NFQ-MGB
A12	1a2a3a - Mixed 60 min	RGB(132,193,241)			P53	RGB(139,189,249)	UNKNOWN	FAM	NFQ-MGB
B4	345 - mixed 120 min	RGB(168,255,222)			P53	RGB(139,189,249)	UNKNOWN	FAM	NFQ-MGB
B5	345 - mixed 120 min	RGB(168,255,222)			P53	RGB(139,189,249)	UNKNOWN	FAM	NFQ-MGB
B6	345 - mixed 120 min	RGB(168,255,222)			P53	RGB(139,189,249)	UNKNOWN	FAM	NFQ-MGB
B7	345 - mixed 120 min	RGB(168,255,222)			P53	RGB(139,189,249)	UNKNOWN	FAM	NFQ-MGB
B8	345 - mixed 120 min	RGB(168,255,222)			P53	RGB(139,189,249)	UNKNOWN	FAM	NFQ-MGB
B9	345 - mixed 120 min	RGB(168,255,222)			P53	RGB(139,189,249)	UNKNOWN	FAM	NFQ-MGB
B10	345 - mixed 120 min	RGB(168,255,222)			P53	RGB(139,189,249)	UNKNOWN	FAM	NFQ-MGB
B11	345 - mixed 120 min	RGB(168,255,222)			P53	RGB(139,189,249)	UNKNOWN	FAM	NFQ-MGB
B12	345 - mixed 120 min	RGB(168,255,222)			P53	RGB(139,189,249)	UNKNOWN	FAM	NFQ-MGB
C4	7a8a9a - random 120min	RGB(223,221,142)			P53	RGB(139,189,249)	UNKNOWN	FAM	NFQ-MGB
C5	7a8a9a - random 120min	RGB(223,221,142)			P53	RGB(139,189,249)	UNKNOWN	FAM	NFQ-MGB
C6	7a8a9a - random 120min	RGB(223,221,142)			P53	RGB(139,189,249)	UNKNOWN	FAM	NFQ-MGB
C7	7a8a9a - random 120min	RGB(223,221,142)			P53	RGB(139,189,249)	UNKNOWN	FAM	NFQ-MGB
C8	7a8a9a - random 120min	RGB(223,221,142)			P53	RGB(139,189,249)	UNKNOWN	FAM	NFQ-MGB
C9	7a8a9a - random 120min	RGB(223,221,142)			P53	RGB(139,189,249)	UNKNOWN	FAM	NFQ-MGB
C10	7a8a9a - random 120min	RGB(223,221,142)			P53	RGB(139,189,249)	UNKNOWN	FAM	NFQ-MGB
C11	7a8a9a - random 120min	RGB(223,221,142)			P53	RGB(139,189,249)	UNKNOWN	FAM	NFQ-MGB
C12	7a8a9a - random 120min	RGB(223,221,142)			P53	RGB(139,189,249)	UNKNOWN	FAM	NFQ-MGB
D4	1a2a3a - Mixed 60 min	RGB(132,193,241)			18S	RGB(208,243,98)	UNKNOWN	FAM	NFQ-MGB
D5	1a2a3a - Mixed 60 min	RGB(132,193,241)			18S	RGB(208,243,98)	UNKNOWN	FAM	NFQ-MGB
D6	1a2a3a - Mixed 60 min	RGB(132,193,241)			18S	RGB(208,243,98)	UNKNOWN	FAM	NFQ-MGB
D7	1a2a3a - Mixed 60 min	RGB(132,193,241)			18S	RGB(208,243,98)	UNKNOWN	FAM	NFQ-MGB
D8	1a2a3a - Mixed 60 min	RGB(132,193,241)			18S	RGB(208,243,98)	UNKNOWN	FAM	NFQ-MGB
D9	1a2a3a - Mixed 60 min	RGB(132,193,241)			18S	RGB(208,243,98)	UNKNOWN	FAM	NFQ-MGB
D10	1a2a3a - Mixed 60 min	RGB(132,193,241)			18S	RGB(208,243,98)	UNKNOWN	FAM	NFQ-MGB
D11	1a2a3a - Mixed 60 min	RGB(132,193,241)			18S	RGB(208,243,98)	UNKNOWN	FAM	NFQ-MGB
D12	1a2a3a - Mixed 60 min	RGB(132,193,241)			18S	RGB(208,243,98)	UNKNOWN	FAM	NFQ-MGB
E4	345 - mixed 120 min	RGB(168,255,222)			18S	RGB(208,243,98)	UNKNOWN	FAM	NFQ-MGB
E5	345 - mixed 120 min	RGB(168,255,222)			18S	RGB(208,243,98)	UNKNOWN	FAM	NFQ-MGB
E6	345 - mixed 120 min	RGB(168,255,222)			18S	RGB(208,243,98)	UNKNOWN	FAM	NFQ-MGB
E7	345 - mixed 120 min	RGB(168,255,222)			18S	RGB(208,243,98)	UNKNOWN	FAM	NFQ-MGB
E8	345 - mixed 120 min	RGB(168,255,222)			18S	RGB(208,243,98)	UNKNOWN	FAM	NFQ-MGB
E9	345 - mixed 120 min	RGB(168,255,222)			18S	RGB(208,243,98)	UNKNOWN	FAM	NFQ-MGB
E10	345 - mixed 120 min	RGB(168,255,222)			18S	RGB(208,243,98)	UNKNOWN	FAM	NFQ-MGB
E11	345 - mixed 120 min	RGB(168,255,222)			18S	RGB(208,243,98)	UNKNOWN	FAM	NFQ-MGB
E12	345 - mixed 120 min	RGB(168,255,222)			18S	RGB(208,243,98)	UNKNOWN	FAM	NFQ-MGB
F4	7a8a9a - random 120min	RGB(223,221,142)			18S	RGB(208,243,98)	UNKNOWN	FAM	NFQ-MGB
F5	7a8a9a - random 120min	RGB(223,221,142)			18S	RGB(208,243,98)	UNKNOWN	FAM	NFQ-MGB
F6	7a8a9a - random 120min	RGB(223,221,142)			18S	RGB(208,243,98)	UNKNOWN	FAM	NFQ-MGB
F7	7a8a9a - random 120min	RGB(223,221,142)			18S	RGB(208,243,98)	UNKNOWN	FAM	NFQ-MGB
F8	7a8a9a - random 120min	RGB(223,221,142)			18S	RGB(208,243,98)	UNKNOWN	FAM	NFQ-MGB
F9	7a8a9a - random 120min	RGB(223,221,142)			18S	RGB(208,243,98)	UNKNOWN	FAM	NFQ-MGB
F10	7a8a9a - random 120min	RGB(223,221,142)			18S	RGB(208,243,98)	UNKNOWN	FAM	NFQ-MGB
F11	7a8a9a - random 120min	RGB(223,221,142)			18S	RGB(208,243,98)	UNKNOWN	FAM	NFQ-MGB
F12	7a8a9a - random 120min	RGB(223,221,142)			18S	RGB(208,243,98)	UNKNOWN	FAM	NFQ-MGB

## Sheet: Results
Block Type	96well
Chemistry	TAQMAN
Experiment File Name	C:\Users\11193327\Downloads\SK10042014 (2).eds
Experiment Run End Time	Not Started
Instrument Type	steponeplus
Passive Reference	ROX
Well	Sample Name	Target Name	Task	Reporter	Quencher	RQ	RQ Min	RQ Max	Cт	Cт Mean	Cт SD	ΔCт	ΔCт Mean	ΔCт SE	HK Control ΔCт Mean	HK Control ΔCт SE	ΔΔCт	Automatic Ct Threshold	Ct Threshold	Automatic Baseline	Baseline Start	Baseline End	Efficiency	Comments	AMPNC	HIGHSD	NOISE	OUTLIERRG	CTFAIL
A1		P53	NTC	FAM	NFQ-MGB				33.0223									FALSE	0.118538	FALSE	1	1	1		Y	N	N	N	N
A2		P53	NTC	FAM	NFQ-MGB				Undetermined									FALSE	0.118538	FALSE	1	1	1		N	N	N	N	N
A3		P53	NTC	FAM	NFQ-MGB				Undetermined									FALSE	0.118538	FALSE	1	1	1		N	N	N	N	N
A4	1a2a3a	P53	UNKNOWN	FAM	NFQ-MGB				23.2462	23.6416	0.681694							FALSE	0.118538	FALSE	1	1	1		N	Y	N	N	N
A5	1a2a3a	P53	UNKNOWN	FAM	NFQ-MGB				24.3062	23.6416	0.681694							FALSE	0.118538	FALSE	1	1	1		N	Y	N	N	N
A6	1a2a3a	P53	UNKNOWN	FAM	NFQ-MGB				23.3224	23.6416	0.681694							FALSE	0.118538	FALSE	1	1	1		N	Y	N	N	N
A7	1a2a3a	P53	UNKNOWN	FAM	NFQ-MGB				23.5883	23.6416	0.681694							FALSE	0.118538	FALSE	1	1	1		N	Y	N	N	N
A8	1a2a3a	P53	UNKNOWN	FAM	NFQ-MGB				23.6081	23.6416	0.681694							FALSE	0.118538	FALSE	1	1	1		N	Y	N	N	N
A9	1a2a3a	P53	UNKNOWN	FAM	NFQ-MGB				23.9964	23.6416	0.681694							FALSE	0.118538	FALSE	1	1	1		N	Y	N	N	N
A10	1a2a3a	P53	UNKNOWN	FAM	NFQ-MGB				22.6149	23.6416	0.681694							FALSE	0.118538	FALSE	1	1	1		N	Y	N	N	N
A11	1a2a3a	P53	UNKNOWN	FAM	NFQ-MGB				23.1782	23.6416	0.681694							FALSE	0.118538	FALSE	1	1	1		N	Y	N	N	N
A12	1a2a3a	P53	UNKNOWN	FAM	NFQ-MGB				24.914	23.6416	0.681694							FALSE	0.118538	FALSE	1	1	1		N	Y	N	N	N
B4	345	P53	UNKNOWN	FAM	NFQ-MGB				21.4087	22.3252	0.583202							FALSE	0.118538	FALSE	1	1	1		N	Y	Y	N	N
B5	345	P53	UNKNOWN	FAM	NFQ-MGB				21.4315	22.3252	0.583202							FALSE	0.118538	FALSE	1	1	1		N	Y	N	N	N
B6	345	P53	UNKNOWN	FAM	NFQ-MGB				22.869	22.3252	0.583202							FALSE	0.118538	FALSE	1	1	1		N	Y	N	N	N
B7	345	P53	UNKNOWN	FAM	NFQ-MGB				22.5519	22.3252	0.583202							FALSE	0.118538	FALSE	1	1	1		N	Y	N	N	N
B8	345	P53	UNKNOWN	FAM	NFQ-MGB				22.7329	22.3252	0.583202							FALSE	0.118538	FALSE	1	1	1		N	Y	N	N	N
B9	345	P53	UNKNOWN	FAM	NFQ-MGB				21.9013	22.3252	0.583202							FALSE	0.118538	FALSE	1	1	1		N	Y	N	N	N
B10	345	P53	UNKNOWN	FAM	NFQ-MGB				22.7784	22.3252	0.583202							FALSE	0.118538	FALSE	1	1	1		N	Y	N	N	N
B11	345	P53	UNKNOWN	FAM	NFQ-MGB				22.6605	22.3252	0.583202							FALSE	0.118538	FALSE	1	1	1		N	Y	N	N	N
B12	345	P53	UNKNOWN	FAM	NFQ-MGB				22.5928	22.3252	0.583202							FALSE	0.118538	FALSE	1	1	1		N	Y	N	N	N
C4	7a8a9a	P53	UNKNOWN	FAM	NFQ-MGB				21.0879	20.878	1.90672							FALSE	0.118538	FALSE	1	1	1		N	Y	N	N	N
C5	7a8a9a	P53	UNKNOWN	FAM	NFQ-MGB				21.4991	20.878	1.90672							FALSE	0.118538	FALSE	1	1	1		N	Y	N	N	N
C6	7a8a9a	P53	UNKNOWN	FAM	NFQ-MGB				18.943	20.878	1.90672							FALSE	0.118538	FALSE	1	1	1		N	Y	N	N	N
C7	7a8a9a	P53	UNKNOWN	FAM	NFQ-MGB				21.546	20.878	1.90672							FALSE	0.118538	FALSE	1	1	1		N	Y	N	N	N
C8	7a8a9a	P53	UNKNOWN	FAM	NFQ-MGB				21.5228	20.878	1.90672							FALSE	0.118538	FALSE	1	1	1		N	Y	N	N	N
C9	7a8a9a	P53	UNKNOWN	FAM	NFQ-MGB				22.9585	20.878	1.90672							FALSE	0.118538	FALSE	1	1	1		N	Y	N	N	N
C10	7a8a9a	P53	UNKNOWN	FAM	NFQ-MGB				20.6647	20.878	1.90672							FALSE	0.118538	FALSE	1	1	1		N	Y	N	N	N
C11	7a8a9a	P53	UNKNOWN	FAM	NFQ-MGB				16.8803	20.878	1.90672							FALSE	0.118538	FALSE	1	1	1		N	Y	N	N	N
C12	7a8a9a	P53	UNKNOWN	FAM	NFQ-MGB				22.7997	20.878	1.90672							FALSE	0.118538	FALSE	1	1	1		N	Y	N	N	N
D1		18S	NTC	FAM	NFQ-MGB				4.69213									FALSE	0.00724218	FALSE	1	1	1		Y	N	N	N	N
D2		18S	NTC	FAM	NFQ-MGB				Undetermined									FALSE	0.00724218	FALSE	1	1	1		N	N	N	N	Y
D3		18S	NTC	FAM	NFQ-MGB				Undetermined									FALSE	0.00724218	FALSE	1	1	1		N	N	N	N	Y
D4	1a2a3a	18S	UNKNOWN	FAM	NFQ-MGB	1	0.374063	2.67335	7.7266	9.15617	1.88833		-14.4855	0.669203			0	FALSE	0.00724218	FALSE	1	1	1		N	Y	N	N	N
D5	1a2a3a	18S	UNKNOWN	FAM	NFQ-MGB	1	0.374063	2.67335	8.92297	9.15617	1.88833		-14.4855	0.669203			0	FALSE	0.00724218	FALSE	1	1	1		N	Y	N	N	N
D6	1a2a3a	18S	UNKNOWN	FAM	NFQ-MGB	1	0.374063	2.67335	6.50879	9.15617	1.88833		-14.4855	0.669203			0	FALSE	0.00724218	FALSE	1	1	1		N	Y	N	N	N
D7	1a2a3a	18S	UNKNOWN	FAM	NFQ-MGB	1	0.374063	2.67335	8.63112	9.15617	1.88833		-14.4855	0.669203			0	FALSE	0.00724218	FALSE	1	1	1		N	Y	N	N	N
D8	1a2a3a	18S	UNKNOWN	FAM	NFQ-MGB	1	0.374063	2.67335	9.67576	9.15617	1.88833		-14.4855	0.669203			0	FALSE	0.00724218	FALSE	1	1	1		N	Y	N	N	N
D9	1a2a3a	18S	UNKNOWN	FAM	NFQ-MGB	1	0.374063	2.67335	9.75836	9.15617	1.88833		-14.4855	0.669203			0	FALSE	0.00724218	FALSE	1	1	1		N	Y	N	N	N
D10	1a2a3a	18S	UNKNOWN	FAM	NFQ-MGB	1	0.374063	2.67335	12.6533	9.15617	1.88833		-14.4855	0.669203			0	FALSE	0.00724218	FALSE	1	1	1		N	Y	N	N	N
D11	1a2a3a	18S	UNKNOWN	FAM	NFQ-MGB	1	0.374063	2.67335	11.0332	9.15617	1.88833		-14.4855	0.669203			0	FALSE	0.00724218	FALSE	1	1	1		N	Y	N	N	N
D12	1a2a3a	18S	UNKNOWN	FAM	NFQ-MGB	1	0.374063	2.67335	7.49541	9.15617	1.88833		-14.4855	0.669203			0	FALSE	0.00724218	FALSE	1	1	1		N	Y	N	N	N
E4	345	18S	UNKNOWN	FAM	NFQ-MGB	0.0725629	0.0283258	0.185886	12.0167	11.6244	1.82984		-10.7008	0.640176			3.78462	FALSE	0.00724218	FALSE	1	1	1		N	Y	N	N	N
E5	345	18S	UNKNOWN	FAM	NFQ-MGB	0.0725629	0.0283258	0.185886	12.5387	11.6244	1.82984		-10.7008	0.640176			3.78462	FALSE	0.00724218	FALSE	1	1	1		N	Y	N	N	N
E6	345	18S	UNKNOWN	FAM	NFQ-MGB	0.0725629	0.0283258	0.185886	11.6037	11.6244	1.82984		-10.7008	0.640176			3.78462	FALSE	0.00724218	FALSE	1	1	1		N	Y	N	N	N
E7	345	18S	UNKNOWN	FAM	NFQ-MGB	0.0725629	0.0283258	0.185886	11.7753	11.6244	1.82984		-10.7008	0.640176			3.78462	FALSE	0.00724218	FALSE	1	1	1		N	Y	N	N	N
E8	345	18S	UNKNOWN	FAM	NFQ-MGB	0.0725629	0.0283258	0.185886	12.3072	11.6244	1.82984		-10.7008	0.640176			3.78462	FALSE	0.00724218	FALSE	1	1	1		N	Y	N	N	N
E9	345	18S	UNKNOWN	FAM	NFQ-MGB	0.0725629	0.0283258	0.185886	12.2494	11.6244	1.82984		-10.7008	0.640176			3.78462	FALSE	0.00724218	FALSE	1	1	1		N	Y	N	N	N
E10	345	18S	UNKNOWN	FAM	NFQ-MGB	0.0725629	0.0283258	0.185886	13.136	11.6244	1.82984		-10.7008	0.640176			3.78462	FALSE	0.00724218	FALSE	1	1	1		N	Y	N	N	N
E11	345	18S	UNKNOWN	FAM	NFQ-MGB	0.0725629	0.0283258	0.185886	12.1014	11.6244	1.82984		-10.7008	0.640176			3.78462	FALSE	0.00724218	FALSE	1	1	1		N	Y	N	N	N
E12	345	18S	UNKNOWN	FAM	NFQ-MGB	0.0725629	0.0283258	0.185886	6.8911	11.6244	1.82984		-10.7008	0.640176			3.78462	FALSE	0.00724218	FALSE	1	1	1		N	Y	N	Y	N
F4	7a8a9a	18S	UNKNOWN	FAM	NFQ-MGB	0.00243101	0.000328323	0.018	17.7571	15.0768	3.61553		-5.80123	1.3625			8.68423	FALSE	0.00724218	FALSE	1	1	1		N	Y	N	N	N
F5	7a8a9a	18S	UNKNOWN	FAM	NFQ-MGB	0.00243101	0.000328323	0.018	17.2198	15.0768	3.61553		-5.80123	1.3625			8.68423	FALSE	0.00724218	FALSE	1	1	1		N	Y	N	N	N
F6	7a8a9a	18S	UNKNOWN	FAM	NFQ-MGB	0.00243101	0.000328323	0.018	16.7586	15.0768	3.61553		-5.80123	1.3625			8.68423	FALSE	0.00724218	FALSE	1	1	1		N	Y	N	N	N
F7	7a8a9a	18S	UNKNOWN	FAM	NFQ-MGB	0.00243101	0.000328323	0.018	16.9865	15.0768	3.61553		-5.80123	1.3625			8.68423	FALSE	0.00724218	FALSE	1	1	1		N	Y	N	N	N
F8	7a8a9a	18S	UNKNOWN	FAM	NFQ-MGB	0.00243101	0.000328323	0.018	17.3877	15.0768	3.61553		-5.80123	1.3625			8.68423	FALSE	0.00724218	FALSE	1	1	1		N	Y	N	N	N
F9	7a8a9a	18S	UNKNOWN	FAM	NFQ-MGB	0.00243101	0.000328323	0.018	16.8764	15.0768	3.61553		-5.80123	1.3625			8.68423	FALSE	0.00724218	FALSE	1	1	1		N	Y	N	N	N
F10	7a8a9a	18S	UNKNOWN	FAM	NFQ-MGB	0.00243101	0.000328323	0.018	13.7068	15.0768	3.61553		-5.80123	1.3625			8.68423	FALSE	0.00724218	FALSE	1	1	1		N	Y	N	N	N
F11	7a8a9a	18S	UNKNOWN	FAM	NFQ-MGB	0.00243101	0.000328323	0.018	12.1111	15.0768	3.61553		-5.80123	1.3625			8.68423	FALSE	0.00724218	FALSE	1	1	1		N	Y	N	N	N
F12	7a8a9a	18S	UNKNOWN	FAM	NFQ-MGB	0.00243101	0.000328323	0.018	6.88695	15.0768	3.61553		-5.80123	1.3625			8.68423	FALSE	0.00724218	FALSE	1	1	1		N	Y	N	Y	N
Analysis Type	Singleplex
Endogenous Control	P53
RQ Min/Max Confidence Level	95.0
Reference Sample	1a2a3a

## Sheet: Raw Data
Block Type	96well
Chemistry	TAQMAN
Experiment File Name	C:\Users\11193327\Downloads\SK10042014 (2).eds
Experiment Run End Time	Not Started
Instrument Type	steponeplus
Passive Reference	ROX
Well	Cycle	BLUE	GREEN	YELLOW	RED
A1	1	11175	5158	2943	3564
A2	1	5970	2648	2099	3713
A3	1	1504	588	1426	3770
A4	1	1283	447	1442	3896
A5	1	485	120	1388	4083
A6	1	1506	530	1202	3176
A7	1	1291	471	1400	3802
A8	1	1818	673	1408	3666
A9	1	830	264	1149	3327
A10	1	8005	3490	2250	3348
A11	1	8276	3638	2359	3450
A12	1	6152	2800	2355	4245
B1	1	-1046	-691	-453	-438
B2	1	-990	-652	-437	-359
B3	1	-907	-598	-382	-324
B4	1	11212	4907	2979	3910
B5	1	12096	5349	3232	4061
B6	1	4893	2054	1948	3726
B7	1	5747	2478	2191	4040
B8	1	8436	3704	2608	4092
B9	1	11972	5208	2971	3716
B10	1	10131	4359	2590	3483
B11	1	9181	4050	2407	3230
B12	1	9116	4067	2456	3309
C1	1	-905	-590	-383	-320
C2	1	-904	-590	-384	-318
C3	1	-778	-506	-322	-271
C4	1	11608	4887	2753	3307
C5	1	12345	5306	2935	3478
C6	1	12810	5447	3029	3622
C7	1	12102	5250	2909	3426
C8	1	13293	5837	3233	3821
C9	1	13190	5778	3193	3758
C10	1	13349	5788	3152	3685
C11	1	12142	5290	2884	3399
C12	1	11875	5405	2969	3473
D1	1	880	8949	16837	13506
D2	1	600	6215	11578	9777
D3	1	550	5869	11172	9793
D4	1	1097	10612	18323	13375
D5	1	649	7883	13780	10292
D6	1	335	5486	10023	8533
D7	1	513	6393	11270	8962
D8	1	578	7059	12751	10301
D9	1	713	7321	12953	10238
D10	1	875	8045	13796	10646
D11	1	581	7375	12832	9968
D12	1	373	6926	12384	9676
E1	1	-865	-558	-374	-293
E2	1	-1044	-689	-464	-390
E3	1	-1029	-686	-448	-386
E4	1	929	9283	16096	11761
E5	1	994	10528	18136	13149
E6	1	760	9109	15755	11734
E7	1	977	10029	16793	11756
E8	1	1011	10325	17799	12842
E9	1	746	9126	15668	11357
E10	1	866	9840	16666	11915
E11	1	846	9533	16008	11354
E12	1	547	9615	16864	12106
F1	1	-870	-592	-359	-300
F2	1	-847	-547	-350	-284
F3	1	-1068	-708	-459	-406
F4	1	1109	10538	18074	12862
F5	1	973	10876	18497	13092
F6	1	853	9692	16100	11269
F7	1	1069	10233	16732	11646
F8	1	1047	10250	17225	12264
F9	1	794	9806	16346	11533
F10	1	1034	10477	17245	12183
F11	1	680	9402	15720	11142
F12	1	686	9107	15548	11219
G1	1	-819	-519	-327	-289
G2	1	-1039	-725	-470	-420
G3	1	-1018	-665	-445	-354
G4	1	-967	-655	-416	-352
G5	1	-840	-546	-348	-286
G6	1	-1058	-699	-459	-393
G7	1	-959	-619	-386	-328
G8	1	-925	-601	-387	-330
G9	1	-988	-639	-401	-350
G10	1	-1068	-709	-450	-395
G11	1	-1118	-736	-492	-414
G12	1	-941	-620	-391	-343
H1	1	-916	-587	-377	-328
H2	1	-978	-617	-403	-339
H3	1	-1079	-701	-446	-422
H4	1	-1031	-652	-422	-377
H5	1	-1111	-737	-462	-384
H6	1	-1019	-616	-344	-315
H7	1	-1035	-677	-423	-375
H8	1	-946	-621	-389	-328
H9	1	-1129	-742	-494	-432
H10	1	-973	-630	-394	-332
H11	1	-904	-569	-348	-308
H12	1	-779	-486	-314	-278
A1	2	11269	5204	2978	3564
A2	2	6147	2722	2159	3769
A3	2	1618	643	1473	3850
A4	2	1375	499	1476	3958
A5	2	568	163	1437	4176
A6	2	1583	565	1243	3243
A7	2	1385	513	1441	3884
A8	2	1891	702	1447	3719
A9	2	931	297	1205	3432
A10	2	8132	3535	2277	3382
A11	2	8455	3728	2398	3495
A12	2	6255	2875	2387	4303
B1	2	-1040	-675	-446	-419
B2	2	-1004	-653	-445	-382
B3	2	-921	-601	-385	-311
B4	2	11364	4996	3020	3959
B5	2	12236	5425	3252	4093
B6	2	4991	2092	1970	3762
B7	2	5836	2541	2227	4049
B8	2	8527	3782	2661	4143
B9	2	11949	5191	2965	3707
B10	2	10219	4412	2640	3502
B11	2	9207	4057	2415	3229
B12	2	9322	4173	2510	3371
C1	2	-892	-591	-366	-320
C2	2	-912	-605	-392	-334
C3	2	-810	-538	-339	-288
C4	2	11674	4946	2776	3312
C5	2	12273	5292	2928	3437
C6	2	13001	5539	3058	3653
C7	2	12174	5298	2926	3443
C8	2	13419	5913	3275	3868
C9	2	13208	5797	3203	3753
C10	2	13356	5827	3161	3721
C11	2	12175	5307	2904	3372
C12	2	12172	5541	3054	3566
D1	2	953	9032	16859	13514
D2	2	613	6208	11569	9749
D3	2	575	5837	11127	9751
D4	2	1107	10614	18321	13379
D5	2	657	7882	13758	10266
D6	2	379	5557	10063	8580
D7	2	535	6447	11317	9018
D8	2	607	7134	12839	10380
D9	2	719	7402	13064	10340
D10	2	856	7991	13706	10596
D11	2	585	7401	12863	9977
D12	2	436	7072	12586	9807
E1	2	-852	-549	-351	-308
E2	2	-1061	-692	-451	-400
E3	2	-1028	-695	-443	-389
E4	2	924	9284	16067	11744
E5	2	989	10472	18008	13048
E6	2	772	9138	15777	11757
E7	2	958	10026	16757	11721
E8	2	1025	10352	17826	12867
E9	2	760	9080	15608	11319
E10	2	882	9813	16632	11920
E11	2	858	9531	15986	11334
E12	2	645	9872	17219	12362
F1	2	-889	-585	-354	-308
F2	2	-840	-553	-336	-277
F3	2	-1071	-715	-461	-397
F4	2	1109	10545	18098	12882
F5	2	960	10863	18461	13067
F6	2	910	9851	16311	11426
F7	2	1074	10258	16746	11676
F8	2	1044	10286	17281	12325
F9	2	767	9743	16227	11465
F10	2	1040	10501	17276	12201
F11	2	714	9457	15737	11168
F12	2	774	9335	15858	11442
G1	2	-816	-526	-323	-283
G2	2	-1048	-711	-464	-409
G3	2	-1018	-669	-424	-350
G4	2	-975	-641	-414	-347
G5	2	-846	-533	-355	-273
G6	2	-1051	-699	-471	-393
G7	2	-961	-624	-385	-317
G8	2	-933	-607	-398	-328
G9	2	-991	-632	-411	-370
G10	2	-1090	-705	-463	-396
G11	2	-1124	-746	-483	-415
G12	2	-937	-605	-383	-331
H1	2	-928	-609	-368	-330
H2	2	-952	-634	-394	-335
H3	2	-1077	-715	-450	-409
H4	2	-989	-655	-421	-363
H5	2	-1095	-728	-454	-384
H6	2	-1004	-610	-347	-302
H7	2	-1011	-657	-448	-372
H8	2	-923	-597	-389	-318
H9	2	-1130	-723	-490	-430
H10	2	-964	-618	-397	-344
H11	2	-917	-575	-367	-306
H12	2	-778	-484	-293	-272
A1	3	11387	5236	2989	3599
A2	3	6266	2771	2203	3817
A3	3	1668	681	1510	3914
A4	3	1422	533	1504	4016
A5	3	587	176	1461	4200
A6	3	1636	575	1273	3255
A7	3	1439	567	1487	3937
A8	3	1936	732	1457	3754
A9	3	971	321	1230	3472
A10	3	8296	3614	2316	3435
A11	3	8561	3759	2416	3537
A12	3	6323	2895	2418	4330
B1	3	-1039	-682	-447	-426
B2	3	-1010	-648	-429	-373
B3	3	-911	-585	-382	-311
B4	3	11489	5065	3066	3997
B5	3	12340	5473	3280	4098
B6	3	5038	2134	2002	3805
B7	3	5880	2576	2244	4074
B8	3	8613	3813	2686	4171
B9	3	12159	5293	3039	3758
B10	3	10347	4478	2666	3544
B11	3	9291	4100	2429	3247
B12	3	9460	4226	2544	3405
C1	3	-891	-592	-382	-337
C2	3	-904	-609	-372	-335
C3	3	-794	-522	-342	-282
C4	3	11844	5005	2805	3375
C5	3	12503	5407	2984	3502
C6	3	13182	5631	3113	3692
C7	3	12382	5389	2977	3480
C8	3	13553	5983	3303	3876
C9	3	13374	5882	3234	3797
C10	3	13550	5910	3218	3739
C11	3	12243	5348	2912	3392
C12	3	12338	5614	3077	3597
D1	3	1002	9144	16924	13561
D2	3	634	6301	11686	9851
D3	3	585	5896	11182	9801
D4	3	1132	10682	18359	13382
D5	3	690	8026	13950	10425
D6	3	385	5619	10132	8623
D7	3	557	6536	11439	9124
D8	3	607	7171	12891	10415
D9	3	746	7493	13193	10454
D10	3	870	8026	13748	10601
D11	3	602	7437	12909	10013
D12	3	454	7159	12682	9868
E1	3	-835	-533	-359	-304
E2	3	-1039	-692	-451	-391
E3	3	-1020	-672	-434	-387
E4	3	951	9292	16038	11721
E5	3	1010	10534	18102	13125
E6	3	803	9211	15842	11801
E7	3	974	10083	16819	11768
E8	3	1046	10425	17870	12889
E9	3	756	9134	15659	11361
E10	3	906	9909	16726	11993
E11	3	866	9535	15963	11327
E12	3	685	10016	17345	12450
F1	3	-875	-564	-352	-300
F2	3	-834	-547	-355	-286
F3	3	-1074	-710	-448	-394
F4	3	1109	10538	18066	12853
F5	3	1000	10989	18634	13205
F6	3	903	9832	16254	11381
F7	3	1099	10337	16810	11711
F8	3	1072	10378	17404	12397
F9	3	787	9805	16305	11526
F10	3	1057	10588	17393	12293
F11	3	709	9477	15791	11203
F12	3	808	9460	16006	11560
G1	3	-798	-531	-313	-280
G2	3	-1046	-722	-492	-439
G3	3	-1009	-657	-429	-352
G4	3	-970	-638	-399	-369
G5	3	-834	-542	-333	-271
G6	3	-1059	-685	-453	-392
G7	3	-958	-622	-383	-313
G8	3	-917	-602	-396	-324
G9	3	-992	-644	-396	-357
G10	3	-1092	-694	-463	-402
G11	3	-1147	-741	-492	-428
G12	3	-928	-616	-382	-333
H1	3	-937	-601	-377	-331
H2	3	-965	-630	-400	-332
H3	3	-1055	-708	-451	-389
H4	3	-980	-649	-421	-363
H5	3	-1101	-718	-459	-383
H6	3	-997	-611	-344	-322
H7	3	-1029	-658	-435	-370
H8	3	-915	-593	-388	-314
H9	3	-1130	-738	-476	-430
H10	3	-968	-623	-387	-341
H11	3	-891	-564	-367	-315
H12	3	-768	-479	-294	-258
A1	4	11389	5227	2993	3579
A2	4	6290	2799	2210	3836
A3	4	1701	681	1529	3944
A4	4	1453	545	1511	4020
A5	4	619	194	1466	4273
A6	4	1664	600	1295	3298
A7	4	1480	576	1498	3960
A8	4	1978	743	1488	3775
A9	4	971	334	1235	3475
A10	4	8450	3664	2364	3484
A11	4	8635	3808	2452	3551
A12	4	6387	2919	2415	4359
B1	4	-1018	-677	-454	-425
B2	4	-994	-664	-431	-375
B3	4	-904	-596	-373	-302
B4	4	11611	5113	3083	4014
B5	4	12403	5509	3297	4106
B6	4	5085	2159	2017	3831
B7	4	5951	2584	2254	4081
B8	4	8615	3808	2688	4147
B9	4	12248	5338	3055	3774
B10	4	10416	4524	2677	3557
B11	4	9311	4110	2432	3237
B12	4	9523	4249	2554	3417
C1	4	-885	-587	-372	-333
C2	4	-899	-596	-371	-320
C3	4	-751	-501	-324	-260
C4	4	11916	5049	2834	3389
C5	4	12699	5496	3022	3534
C6	4	13382	5731	3161	3728
C7	4	12577	5483	3032	3520
C8	4	13642	6011	3314	3869
C9	4	13515	5946	3254	3809
C10	4	13658	5965	3224	3753
C11	4	12298	5364	2909	3373
C12	4	12442	5655	3103	3603
D1	4	1057	9271	17031	13599
D2	4	655	6345	11738	9903
D3	4	581	5896	11213	9824
D4	4	1158	10775	18467	13479
D5	4	713	8052	13938	10411
D6	4	403	5677	10195	8668
D7	4	586	6597	11517	9166
D8	4	617	7185	12890	10410
D9	4	764	7518	13187	10431
D10	4	867	8066	13786	10631
D11	4	613	7471	12925	10007
D12	4	513	7233	12761	9946
E1	4	-845	-546	-360	-296
E2	4	-1030	-672	-457	-387
E3	4	-1020	-676	-451	-382
E4	4	963	9377	16182	11835
E5	4	1020	10551	18065	13071
E6	4	809	9303	15950	11887
E7	4	994	10160	16902	11812
E8	4	1047	10463	17919	12916
E9	4	781	9180	15745	11416
E10	4	909	9976	16851	12060
E11	4	865	9610	16058	11374
E12	4	723	10156	17516	12571
F1	4	-866	-570	-357	-299
F2	4	-829	-537	-341	-271
F3	4	-1063	-704	-461	-401
F4	4	1123	10651	18225	12978
F5	4	1010	11003	18644	13202
F6	4	901	9874	16285	11402
F7	4	1121	10404	16907	11777
F8	4	1086	10392	17410	12420
F9	4	823	9896	16453	11601
F10	4	1071	10634	17444	12327
F11	4	747	9583	15926	11299
F12	4	858	9588	16158	11654
G1	4	-780	-524	-324	-273
G2	4	-1046	-712	-487	-414
G3	4	-1005	-650	-425	-327
G4	4	-946	-643	-404	-356
G5	4	-832	-541	-342	-261
G6	4	-1057	-691	-453	-391
G7	4	-951	-619	-389	-308
G8	4	-925	-600	-383	-333
G9	4	-990	-637	-420	-360
G10	4	-1074	-706	-461	-388
G11	4	-1113	-730	-492	-419
G12	4	-919	-603	-372	-335
H1	4	-927	-600	-373	-334
H2	4	-961	-602	-385	-330
H3	4	-1055	-699	-443	-388
H4	4	-987	-633	-405	-365
H5	4	-1102	-721	-452	-376
H6	4	-1006	-610	-356	-305
H7	4	-1017	-664	-425	-372
H8	4	-901	-581	-368	-322
H9	4	-1140	-737	-491	-422
H10	4	-941	-607	-373	-328
H11	4	-887	-560	-358	-311
H12	4	-765	-481	-304	-256
A1	5	11415	5248	2988	3577
A2	5	6337	2804	2214	3855
A3	5	1715	690	1522	3928
A4	5	1481	543	1523	4044
A5	5	627	203	1480	4250
A6	5	1666	608	1278	3286
A7	5	1490	564	1490	3954
A8	5	1992	767	1476	3784
A9	5	1004	345	1259	3472
A10	5	8377	3642	2349	3456
A11	5	8674	3800	2451	3555
A12	5	6404	2923	2438	4357
B1	5	-1014	-673	-434	-427
B2	5	-1000	-670	-443	-375
B3	5	-923	-604	-396	-323
B4	5	11682	5156	3105	4035
B5	5	12490	5531	3303	4112
B6	5	5133	2177	2023	3833
B7	5	6026	2629	2285	4119
B8	5	8670	3841	2696	4165
B9	5	12384	5394	3077	3823
B10	5	10550	4580	2722	3583
B11	5	9455	4181	2472	3285
B12	5	9562	4273	2555	3425
C1	5	-887	-585	-372	-325
C2	5	-910	-592	-392	-334
C3	5	-757	-482	-317	-253
C4	5	12039	5107	2859	3410
C5	5	12852	5560	3052	3568
C6	5	13508	5782	3182	3763
C7	5	12694	5535	3052	3569
C8	5	13768	6068	3338	3903
C9	5	13686	6014	3310	3852
C10	5	13820	6020	3260	3776
C11	5	12294	5372	2906	3372
C12	5	12472	5665	3115	3615
D1	5	1077	9346	17088	13623
D2	5	656	6394	11827	9969
D3	5	583	5949	11250	9863
D4	5	1165	10866	18527	13503
D5	5	694	8120	14027	10463
D6	5	413	5768	10271	8736
D7	5	576	6638	11542	9166
D8	5	645	7274	12971	10474
D9	5	763	7563	13218	10467
D10	5	902	8154	13911	10724
D11	5	614	7458	12903	9988
D12	5	508	7253	12754	9937
E1	5	-833	-521	-346	-288
E2	5	-1027	-673	-449	-383
E3	5	-1027	-685	-446	-371
E4	5	972	9444	16254	11857
E5	5	1023	10603	18161	13152
E6	5	805	9307	15952	11869
E7	5	1007	10207	16935	11836
E8	5	1069	10538	18013	12991
E9	5	790	9276	15860	11508
E10	5	926	10070	16948	12122
E11	5	879	9631	16072	11378
E12	5	744	10176	17543	12578
F1	5	-863	-567	-356	-300
F2	5	-830	-535	-332	-269
F3	5	-1071	-717	-471	-379
F4	5	1144	10719	18301	12985
F5	5	1008	11081	18749	13284
F6	5	916	9940	16388	11460
F7	5	1109	10428	16899	11765
F8	5	1089	10504	17554	12523
F9	5	819	9956	16526	11653
F10	5	1089	10715	17569	12409
F11	5	753	9627	15958	11321
F12	5	867	9595	16117	11594
G1	5	-791	-518	-336	-277
G2	5	-1061	-712	-475	-435
G3	5	-996	-652	-418	-341
G4	5	-930	-631	-404	-350
G5	5	-821	-532	-342	-276
G6	5	-1044	-705	-459	-382
G7	5	-963	-630	-382	-330
G8	5	-913	-595	-407	-322
G9	5	-1001	-634	-413	-364
G10	5	-1068	-712	-452	-388
G11	5	-1117	-741	-499	-418
G12	5	-916	-606	-389	-321
H1	5	-926	-599	-368	-323
H2	5	-950	-622	-383	-338
H3	5	-1052	-696	-459	-398
H4	5	-980	-647	-415	-362
H5	5	-1092	-726	-450	-390
H6	5	-983	-615	-350	-327
H7	5	-1022	-661	-442	-368
H8	5	-907	-583	-383	-317
H9	5	-1123	-736	-489	-430
H10	5	-937	-599	-376	-325
H11	5	-872	-559	-366	-306
H12	5	-754	-475	-297	-270
A1	6	11410	5235	2977	3562
A2	6	6368	2810	2224	3852
A3	6	1706	674	1522	3911
A4	6	1482	554	1521	4056
A5	6	638	211	1486	4241
A6	6	1670	612	1295	3305
A7	6	1493	585	1501	3983
A8	6	1974	737	1469	3733
A9	6	984	350	1253	3468
A10	6	8416	3649	2355	3470
A11	6	8707	3813	2460	3564
A12	6	6425	2934	2434	4374
B1	6	-1025	-691	-456	-426
B2	6	-998	-663	-433	-381
B3	6	-917	-598	-377	-313
B4	6	11749	5177	3118	4044
B5	6	12549	5553	3323	4134
B6	6	5173	2183	2042	3851
B7	6	6041	2637	2284	4129
B8	6	8799	3910	2732	4230
B9	6	12466	5414	3094	3810
B10	6	10631	4616	2732	3590
B11	6	9504	4197	2489	3311
B12	6	9559	4273	2568	3411
C1	6	-895	-582	-351	-307
C2	6	-906	-589	-389	-324
C3	6	-737	-492	-313	-243
C4	6	12175	5164	2880	3442
C5	6	12967	5605	3073	3604
C6	6	13623	5800	3192	3777
C7	6	12847	5618	3099	3621
C8	6	13915	6147	3387	3937
C9	6	13770	6045	3328	3863
C10	6	13902	6060	3297	3787
C11	6	12416	5425	2934	3401
C12	6	12496	5675	3112	3615
D1	6	1119	9455	17233	13731
D2	6	680	6422	11852	9983
D3	6	586	5940	11249	9866
D4	6	1191	11010	18619	13553
D5	6	709	8182	14060	10481
D6	6	440	5850	10357	8768
D7	6	591	6685	11562	9191
D8	6	653	7339	13064	10558
D9	6	778	7640	13364	10578
D10	6	902	8201	13959	10779
D11	6	625	7542	12987	10065
D12	6	520	7292	12792	9951
E1	6	-838	-547	-349	-293
E2	6	-1029	-686	-453	-391
E3	6	-1027	-674	-440	-372
E4	6	988	9502	16263	11871
E5	6	1029	10656	18168	13178
E6	6	836	9428	16135	12013
E7	6	1026	10243	16949	11845
E8	6	1085	10615	18126	13068
E9	6	800	9346	15937	11573
E10	6	938	10122	17027	12163
E11	6	892	9676	16117	11411
E12	6	750	10225	17556	12589
F1	6	-875	-579	-343	-288
F2	6	-832	-535	-357	-282
F3	6	-1070	-711	-459	-391
F4	6	1142	10734	18296	12987
F5	6	1020	11167	18857	13351
F6	6	940	10004	16447	11524
F7	6	1133	10468	16933	11787
F8	6	1109	10570	17644	12561
F9	6	834	10019	16566	11696
F10	6	1090	10782	17628	12452
F11	6	756	9670	16003	11329
F12	6	881	9651	16186	11643
G1	6	-779	-507	-317	-277
G2	6	-1052	-712	-475	-433
G3	6	-989	-670	-431	-338
G4	6	-934	-642	-404	-348
G5	6	-835	-533	-344	-271
G6	6	-1045	-709	-454	-385
G7	6	-951	-629	-381	-326
G8	6	-928	-615	-405	-324
G9	6	-980	-643	-412	-347
G10	6	-1058	-693	-452	-399
G11	6	-1111	-735	-480	-425
G12	6	-901	-590	-377	-316
H1	6	-925	-599	-378	-322
H2	6	-957	-618	-387	-329
H3	6	-1044	-701	-460	-383
H4	6	-974	-644	-423	-357
H5	6	-1100	-722	-443	-392
H6	6	-987	-616	-349	-314
H7	6	-1023	-659	-428	-371
H8	6	-892	-580	-380	-319
H9	6	-1126	-731	-476	-410
H10	6	-944	-606	-378	-322
H11	6	-874	-553	-353	-306
H12	6	-751	-484	-279	-242
A1	7	11443	5229	2978	3565
A2	7	6336	2797	2207	3831
A3	7	1708	699	1512	3906
A4	7	1470	552	1511	4019
A5	7	646	202	1467	4246
A6	7	1689	628	1291	3294
A7	7	1465	576	1500	3962
A8	7	1979	753	1463	3774
A9	7	996	347	1254	3487
A10	7	8356	3631	2332	3435
A11	7	8716	3824	2459	3556
A12	7	6430	2949	2446	4365
B1	7	-1038	-667	-451	-423
B2	7	-978	-662	-431	-374
B3	7	-926	-604	-383	-318
B4	7	11795	5225	3141	4035
B5	7	12642	5615	3348	4166
B6	7	5190	2190	2044	3851
B7	7	6076	2659	2308	4169
B8	7	8784	3897	2730	4205
B9	7	12561	5468	3104	3824
B10	7	10681	4632	2748	3602
B11	7	9542	4213	2493	3303
B12	7	9569	4280	2554	3415
C1	7	-876	-580	-374	-305
C2	7	-897	-595	-378	-327
C3	7	-724	-476	-317	-244
C4	7	12213	5177	2873	3430
C5	7	12994	5618	3085	3590
C6	7	13678	5860	3226	3779
C7	7	12876	5626	3093	3607
C8	7	13957	6169	3397	3949
C9	7	13884	6115	3345	3888
C10	7	13997	6111	3303	3820
C11	7	12508	5475	2964	3421
C12	7	12522	5683	3121	3616
D1	7	1134	9602	17405	13855
D2	7	675	6457	11888	10015
D3	7	610	5993	11313	9920
D4	7	1229	11160	18767	13665
D5	7	745	8269	14151	10545
D6	7	441	5939	10400	8800
D7	7	584	6684	11500	9119
D8	7	656	7370	13057	10531
D9	7	790	7702	13397	10605
D10	7	929	8259	14021	10826
D11	7	647	7589	13059	10106
D12	7	520	7319	12789	9952
E1	7	-831	-538	-358	-292
E2	7	-1024	-680	-457	-385
E3	7	-1007	-670	-444	-381
E4	7	984	9546	16344	11924
E5	7	1047	10719	18282	13242
E6	7	814	9431	16097	11973
E7	7	1024	10292	16973	11867
E8	7	1072	10635	18136	13068
E9	7	827	9418	16025	11631
E10	7	946	10175	17088	12215
E11	7	916	9751	16196	11461
E12	7	756	10273	17608	12614
F1	7	-855	-564	-352	-303
F2	7	-841	-554	-344	-284
F3	7	-1065	-711	-464	-404
F4	7	1159	10819	18420	13088
F5	7	1042	11239	18988	13455
F6	7	939	10044	16538	11572
F7	7	1136	10518	17017	11840
F8	7	1104	10559	17616	12553
F9	7	835	10057	16605	11723
F10	7	1099	10844	17713	12507
F11	7	788	9761	16115	11416
F12	7	891	9705	16215	11670
G1	7	-779	-526	-324	-282
G2	7	-1048	-715	-492	-424
G3	7	-1006	-676	-427	-350
G4	7	-963	-643	-411	-352
G5	7	-842	-546	-345	-271
G6	7	-1059	-702	-453	-392
G7	7	-956	-628	-397	-327
G8	7	-932	-608	-410	-326
G9	7	-978	-636	-405	-348
G10	7	-1047	-707	-444	-385
G11	7	-1094	-711	-481	-406
G12	7	-901	-593	-372	-328
H1	7	-921	-599	-357	-326
H2	7	-953	-609	-388	-338
H3	7	-1047	-705	-452	-392
H4	7	-991	-638	-423	-370
H5	7	-1088	-726	-458	-398
H6	7	-989	-612	-350	-313
H7	7	-1005	-659	-434	-364
H8	7	-881	-576	-376	-308
H9	7	-1124	-724	-474	-430
H10	7	-930	-597	-376	-312
H11	7	-876	-542	-350	-299
H12	7	-741	-465	-295	-247
A1	8	11439	5222	2979	3561
A2	8	6346	2810	2210	3828
A3	8	1724	694	1529	3899
A4	8	1486	543	1524	4039
A5	8	661	221	1483	4241
A6	8	1698	625	1299	3292
A7	8	1507	604	1508	3986
A8	8	1989	753	1486	3761
A9	8	1027	338	1248	3480
A10	8	8378	3651	2344	3447
A11	8	8757	3849	2480	3571
A12	8	6463	2962	2469	4385
B1	8	-1006	-674	-433	-418
B2	8	-979	-656	-426	-379
B3	8	-918	-593	-386	-323
B4	8	11864	5242	3140	4060
B5	8	12649	5630	3350	4155
B6	8	5220	2225	2072	3887
B7	8	6120	2662	2311	4166
B8	8	8832	3920	2728	4203
B9	8	12647	5509	3137	3846
B10	8	10774	4682	2767	3650
B11	8	9574	4240	2501	3305
B12	8	9589	4283	2556	3419
C1	8	-870	-570	-355	-295
C2	8	-908	-604	-398	-331
C3	8	-718	-460	-294	-236
C4	8	12299	5223	2905	3448
C5	8	13140	5686	3110	3617
C6	8	13772	5899	3246	3785
C7	8	12919	5634	3085	3589
C8	8	14043	6197	3401	3957
C9	8	14034	6164	3385	3928
C10	8	14076	6134	3324	3814
C11	8	12608	5505	2972	3442
C12	8	12542	5706	3128	3638
D1	8	1165	9622	17463	13885
D2	8	678	6486	11922	10053
D3	8	610	5978	11305	9912
D4	8	1253	11344	18875	13720
D5	8	747	8395	14228	10607
D6	8	480	6097	10521	8898
D7	8	613	6813	11649	9222
D8	8	674	7439	13132	10568
D9	8	817	7792	13495	10661
D10	8	933	8306	14110	10866
D11	8	667	7678	13119	10163
D12	8	532	7338	12809	9951
E1	8	-821	-545	-348	-310
E2	8	-1009	-691	-444	-391
E3	8	-1029	-673	-451	-379
E4	8	1012	9633	16452	12003
E5	8	1054	10773	18313	13238
E6	8	871	9556	16253	12087
E7	8	1035	10320	16953	11826
E8	8	1096	10705	18217	13132
E9	8	823	9448	16043	11630
E10	8	967	10243	17166	12274
E11	8	924	9856	16311	11546
E12	8	784	10305	17606	12617
F1	8	-870	-566	-347	-303
F2	8	-830	-524	-350	-268
F3	8	-1074	-714	-444	-407
F4	8	1167	10873	18432	13080
F5	8	1048	11269	19009	13450
F6	8	949	10115	16609	11629
F7	8	1150	10559	17075	11856
F8	8	1124	10610	17693	12594
F9	8	838	10079	16616	11729
F10	8	1127	10925	17775	12533
F11	8	821	9881	16262	11523
F12	8	912	9756	16265	11694
G1	8	-789	-521	-329	-281
G2	8	-1050	-707	-476	-423
G3	8	-1012	-653	-426	-345
G4	8	-951	-631	-415	-340
G5	8	-834	-553	-346	-278
G6	8	-1052	-704	-451	-390
G7	8	-954	-629	-386	-318
G8	8	-941	-617	-394	-330
G9	8	-975	-615	-408	-347
G10	8	-1039	-686	-441	-365
G11	8	-1086	-710	-468	-399
G12	8	-885	-583	-375	-299
H1	8	-908	-598	-371	-321
H2	8	-942	-600	-375	-342
H3	8	-1041	-699	-446	-387
H4	8	-980	-644	-419	-355
H5	8	-1088	-722	-465	-375
H6	8	-990	-606	-340	-294
H7	8	-980	-645	-423	-369
H8	8	-875	-557	-357	-290
H9	8	-1105	-716	-474	-425
H10	8	-918	-572	-367	-310
H11	8	-859	-538	-347	-287
H12	8	-727	-459	-294	-241
A1	9	11381	5207	2966	3523
A2	9	6318	2791	2198	3803
A3	9	1736	718	1532	3913
A4	9	1510	591	1570	4118
A5	9	643	221	1477	4243
A6	9	1692	632	1305	3307
A7	9	1522	604	1515	3982
A8	9	1990	765	1478	3776
A9	9	1006	351	1253	3492
A10	9	8392	3641	2336	3452
A11	9	8713	3828	2447	3541
A12	9	6467	2954	2470	4371
B1	9	-1011	-666	-445	-422
B2	9	-969	-646	-427	-356
B3	9	-894	-589	-381	-316
B4	9	11907	5275	3171	4107
B5	9	12713	5646	3369	4174
B6	9	5257	2234	2070	3898
B7	9	6145	2690	2315	4195
B8	9	8879	3929	2739	4213
B9	9	12654	5514	3125	3859
B10	9	10801	4704	2786	3645
B11	9	9600	4257	2515	3330
B12	9	9603	4279	2558	3422
C1	9	-859	-570	-351	-312
C2	9	-895	-599	-364	-323
C3	9	-682	-457	-292	-228
C4	9	12632	5374	2989	3538
C5	9	13156	5701	3113	3619
C6	9	13834	5924	3245	3795
C7	9	13018	5698	3121	3632
C8	9	14109	6239	3435	3961
C9	9	14048	6177	3383	3931
C10	9	14147	6184	3337	3836
C11	9	12541	5462	2961	3393
C12	9	12588	5724	3135	3644
D1	9	1163	9657	17490	13923
D2	9	708	6560	12000	10124
D3	9	609	6061	11395	9984
D4	9	1285	11566	18838	13629
D5	9	763	8534	14335	10656
D6	9	492	6219	10526	8872
D7	9	603	6843	11554	9129
D8	9	692	7568	13245	10658
D9	9	837	7894	13539	10692
D10	9	920	8368	14133	10891
D11	9	653	7678	13073	10083
D12	9	551	7400	12849	9988
E1	9	-825	-542	-351	-290
E2	9	-1020	-680	-456	-396
E3	9	-1004	-685	-438	-370
E4	9	997	9593	16197	11735
E5	9	1053	10864	18416	13350
E6	9	855	9571	16230	12054
E7	9	1036	10360	17013	11844
E8	9	1105	10784	18291	13180
E9	9	836	9532	16107	11665
E10	9	982	10336	17293	12369
E11	9	928	9898	16358	11574
E12	9	787	10304	17573	12591
F1	9	-865	-555	-346	-294
F2	9	-826	-530	-343	-278
F3	9	-1058	-699	-452	-388
F4	9	1122	10628	17940	12685
F5	9	1054	11384	19161	13577
F6	9	955	10100	16593	11610
F7	9	1180	10631	17154	11928
F8	9	1136	10686	17781	12675
F9	9	869	10143	16707	11787
F10	9	1136	10988	17879	12621
F11	9	826	9918	16286	11537
F12	9	890	9770	16220	11668
G1	9	-788	-506	-330	-268
G2	9	-1049	-722	-478	-416
G3	9	-1000	-666	-429	-333
G4	9	-942	-645	-414	-359
G5	9	-850	-549	-347	-285
G6	9	-1053	-702	-452	-379
G7	9	-965	-624	-385	-333
G8	9	-942	-598	-382	-333
G9	9	-975	-622	-402	-353
G10	9	-1027	-673	-438	-374
G11	9	-1062	-693	-458	-391
G12	9	-872	-582	-373	-321
H1	9	-922	-597	-378	-312
H2	9	-936	-610	-388	-318
H3	9	-1039	-683	-451	-389
H4	9	-976	-640	-416	-369
H5	9	-1088	-711	-460	-384
H6	9	-977	-608	-340	-310
H7	9	-978	-659	-419	-367
H8	9	-862	-550	-356	-303
H9	9	-1102	-717	-479	-410
H10	9	-898	-586	-366	-317
H11	9	-847	-543	-354	-277
H12	9	-728	-459	-287	-250
A1	10	11459	5222	2969	3557
A2	10	6299	2767	2204	3785
A3	10	1738	698	1540	3925
A4	10	1488	551	1526	4028
A5	10	662	228	1493	4251
A6	10	1696	621	1292	3294
A7	10	1536	617	1520	4012
A8	10	2006	761	1489	3772
A9	10	1005	354	1246	3483
A10	10	8445	3657	2357	3455
A11	10	8740	3849	2464	3568
A12	10	6475	2952	2464	4361
B1	10	-1005	-660	-426	-426
B2	10	-972	-640	-419	-373
B3	10	-906	-587	-374	-304
B4	10	11936	5297	3170	4073
B5	10	12743	5669	3366	4158
B6	10	5285	2240	2074	3919
B7	10	6179	2710	2319	4194
B8	10	8947	3951	2775	4247
B9	10	12724	5554	3150	3876
B10	10	10830	4704	2782	3655
B11	10	9641	4256	2514	3314
B12	10	9631	4306	2566	3427
C1	10	-856	-549	-348	-314
C2	10	-887	-595	-380	-328
C3	10	-689	-461	-285	-238
C4	10	12418	5277	2939	3473
C5	10	13258	5743	3146	3658
C6	10	13878	5953	3253	3815
C7	10	13074	5718	3125	3652
C8	10	14229	6292	3457	3992
C9	10	14102	6200	3381	3912
C10	10	14172	6196	3344	3830
C11	10	12767	5579	3012	3462
C12	10	12633	5734	3145	3638
D1	10	1170	9690	17516	13927
D2	10	704	6541	11997	10084
D3	10	624	6080	11453	10045
D4	10	1324	11848	19100	13844
D5	10	795	8714	14395	10686
D6	10	515	6474	10656	8949
D7	10	649	7065	11745	9265
D8	10	689	7706	13279	10668
D9	10	845	8014	13557	10689
D10	10	905	8411	14163	10905
D11	10	687	7867	13323	10290
D12	10	553	7447	12850	9981
E1	10	-803	-535	-355	-277
E2	10	-1005	-682	-453	-398
E3	10	-1000	-682	-447	-388
E4	10	1021	9729	16476	12015
E5	10	1079	10931	18472	13366
E6	10	889	9722	16379	12181
E7	10	1043	10439	17023	11845
E8	10	1117	10879	18379	13224
E9	10	854	9628	16188	11732
E10	10	992	10411	17339	12401
E11	10	950	10019	16468	11639
E12	10	776	10312	17528	12549
F1	10	-849	-570	-363	-305
F2	10	-832	-535	-336	-287
F3	10	-1071	-712	-445	-393
F4	10	1173	10916	18462	13113
F5	10	1066	11408	19150	13563
F6	10	974	10164	16655	11669
F7	10	1170	10712	17216	11982
F8	10	1150	10730	17829	12698
F9	10	873	10177	16748	11813
F10	10	1147	11066	17954	12690
F11	10	802	9988	16371	11570
F12	10	894	9760	16161	11598
G1	10	-779	-519	-325	-264
G2	10	-1052	-714	-470	-428
G3	10	-1012	-665	-442	-334
G4	10	-937	-642	-393	-356
G5	10	-830	-549	-349	-279
G6	10	-1058	-684	-466	-390
G7	10	-957	-626	-386	-329
G8	10	-915	-611	-399	-333
G9	10	-964	-644	-404	-358
G10	10	-1010	-670	-421	-362
G11	10	-1068	-697	-481	-402
G12	10	-855	-562	-381	-304
H1	10	-897	-589	-377	-307
H2	10	-918	-597	-375	-333
H3	10	-1050	-692	-441	-389
H4	10	-973	-645	-413	-369
H5	10	-1094	-714	-449	-386
H6	10	-980	-601	-341	-292
H7	10	-963	-639	-419	-349
H8	10	-845	-557	-344	-292
H9	10	-1097	-699	-467	-403
H10	10	-891	-584	-363	-297
H11	10	-851	-527	-334	-300
H12	10	-711	-440	-275	-245
A1	11	11375	5181	2940	3509
A2	11	6294	2780	2195	3798
A3	11	1749	704	1532	3921
A4	11	1504	569	1541	4064
A5	11	686	225	1492	4271
A6	11	1713	632	1289	3319
A7	11	1540	624	1536	4009
A8	11	2021	782	1493	3796
A9	11	1029	363	1258	3493
A10	11	8492	3681	2361	3475
A11	11	8684	3807	2445	3536
A12	11	6481	2953	2452	4361
B1	11	-983	-658	-431	-402
B2	11	-955	-631	-429	-360
B3	11	-891	-577	-380	-296
B4	11	12017	5308	3179	4116
B5	11	12856	5726	3397	4202
B6	11	5291	2253	2089	3919
B7	11	6186	2704	2343	4188
B8	11	8965	3981	2760	4253
B9	11	12764	5555	3153	3868
B10	11	10868	4720	2783	3647
B11	11	9713	4293	2542	3347
B12	11	9696	4317	2588	3430
C1	11	-854	-537	-347	-298
C2	11	-873	-588	-378	-319
C3	11	-658	-427	-274	-224
C4	11	12579	5343	2967	3507
C5	11	13239	5729	3124	3629
C6	11	13932	5978	3256	3818
C7	11	13186	5762	3164	3652
C8	11	14283	6322	3460	3999
C9	11	14202	6244	3405	3945
C10	11	14235	6218	3361	3844
C11	11	12754	5559	3004	3453
C12	11	12726	5786	3166	3653
D1	11	1159	9696	17494	13902
D2	11	700	6558	12008	10111
D3	11	618	6086	11449	10029
D4	11	1356	12221	19255	13869
D5	11	832	8982	14535	10760
D6	11	557	6713	10729	8974
D7	11	669	7237	11833	9316
D8	11	740	7899	13417	10749
D9	11	878	8217	13692	10756
D10	11	927	8508	14197	10909
D11	11	703	7930	13286	10261
D12	11	562	7565	12984	10066
E1	11	-828	-525	-357	-292
E2	11	-1032	-678	-453	-395
E3	11	-1012	-665	-458	-371
E4	11	1032	9800	16492	11990
E5	11	1085	11029	18528	13409
E6	11	883	9756	16332	12136
E7	11	1073	10563	17144	11934
E8	11	1135	10986	18465	13270
E9	11	861	9733	16240	11752
E10	11	978	10433	17301	12359
E11	11	957	10097	16539	11682
E12	11	809	10450	17681	12647
F1	11	-860	-561	-335	-299
F2	11	-824	-548	-335	-296
F3	11	-1055	-703	-453	-399
F4	11	1158	10907	18401	13045
F5	11	1102	11454	19221	13621
F6	11	979	10190	16687	11664
F7	11	1177	10738	17282	12038
F8	11	1154	10787	17902	12755
F9	11	873	10223	16775	11843
F10	11	1142	11077	17916	12648
F11	11	838	10067	16423	11608
F12	11	923	9863	16270	11674
G1	11	-788	-513	-317	-263
G2	11	-1056	-721	-486	-422
G3	11	-1005	-668	-439	-326
G4	11	-955	-645	-404	-362
G5	11	-859	-556	-346	-289
G6	11	-1061	-702	-453	-393
G7	11	-965	-630	-388	-330
G8	11	-903	-584	-384	-312
G9	11	-968	-618	-411	-346
G10	11	-1016	-658	-420	-371
G11	11	-1051	-689	-467	-390
G12	11	-869	-561	-369	-302
H1	11	-908	-583	-360	-306
H2	11	-914	-604	-382	-316
H3	11	-1030	-688	-445	-393
H4	11	-966	-652	-420	-369
H5	11	-1095	-708	-451	-385
H6	11	-971	-580	-324	-291
H7	11	-967	-638	-403	-352
H8	11	-834	-551	-356	-285
H9	11	-1083	-700	-464	-386
H10	11	-889	-583	-353	-305
H11	11	-826	-513	-335	-280
H12	11	-719	-442	-277	-232
A1	12	11383	5166	2951	3506
A2	12	6284	2763	2184	3784
A3	12	1761	724	1537	3956
A4	12	1517	559	1545	4043
A5	12	692	224	1492	4268
A6	12	1724	639	1315	3334
A7	12	1561	629	1540	4028
A8	12	2041	772	1503	3783
A9	12	1036	368	1271	3472
A10	12	8593	3710	2383	3475
A11	12	8686	3818	2443	3543
A12	12	6454	2949	2436	4340
B1	12	-973	-641	-432	-405
B2	12	-965	-656	-424	-361
B3	12	-891	-579	-375	-301
B4	12	12049	5328	3186	4109
B5	12	12827	5697	3388	4176
B6	12	5321	2272	2077	3926
B7	12	6209	2715	2347	4194
B8	12	8993	3993	2777	4258
B9	12	12837	5603	3181	3905
B10	12	10872	4727	2782	3659
B11	12	9744	4303	2530	3338
B12	12	9742	4344	2595	3440
C1	12	-849	-535	-335	-298
C2	12	-861	-572	-363	-316
C3	12	-626	-415	-260	-216
C4	12	12502	5325	2947	3492
C5	12	13361	5790	3157	3664
C6	12	13994	5990	3278	3829
C7	12	13192	5778	3164	3651
C8	12	14365	6338	3496	4024
C9	12	14186	6231	3412	3929
C10	12	14234	6199	3354	3850
C11	12	12852	5614	3016	3470
C12	12	12779	5793	3174	3629
D1	12	1170	9700	17470	13878
D2	12	717	6609	12072	10151
D3	12	617	6080	11426	9996
D4	12	1427	12612	19445	13972
D5	12	905	9392	14785	10892
D6	12	598	7053	10891	9055
D7	12	718	7520	12002	9418
D8	12	775	8106	13476	10792
D9	12	885	8407	13720	10759
D10	12	947	8622	14237	10919
D11	12	710	8095	13411	10350
D12	12	586	7624	12995	10060
E1	12	-811	-521	-342	-285
E2	12	-1029	-685	-449	-395
E3	12	-1020	-688	-455	-379
E4	12	1049	9918	16599	12089
E5	12	1116	11174	18619	13426
E6	12	920	9918	16420	12183
E7	12	1087	10711	17236	11983
E8	12	1156	11094	18475	13273
E9	12	882	9845	16318	11805
E10	12	1012	10564	17411	12435
E11	12	981	10220	16587	11699
E12	12	789	10507	17667	12633
F1	12	-844	-552	-339	-284
F2	12	-837	-559	-349	-278
F3	12	-1066	-696	-456	-414
F4	12	1177	11013	18591	13181
F5	12	1072	11464	19181	13557
F6	12	991	10275	16789	11738
F7	12	1197	10816	17370	12085
F8	12	1149	10801	17856	12711
F9	12	886	10275	16868	11880
F10	12	1173	11194	17994	12692
F11	12	849	10167	16497	11660
F12	12	936	9928	16280	11689
G1	12	-778	-499	-319	-277
G2	12	-1050	-726	-484	-422
G3	12	-1029	-688	-430	-346
G4	12	-932	-646	-407	-363
G5	12	-839	-557	-350	-276
G6	12	-1053	-709	-479	-399
G7	12	-946	-626	-375	-320
G8	12	-890	-585	-392	-310
G9	12	-945	-627	-388	-332
G10	12	-989	-665	-409	-359
G11	12	-1029	-682	-449	-390
G12	12	-855	-564	-349	-289
H1	12	-894	-583	-358	-315
H2	12	-922	-587	-381	-316
H3	12	-1039	-687	-442	-390
H4	12	-972	-630	-416	-359
H5	12	-1085	-708	-469	-381
H6	12	-963	-577	-324	-290
H7	12	-963	-632	-406	-359
H8	12	-826	-530	-350	-285
H9	12	-1074	-694	-471	-395
H10	12	-879	-575	-355	-302
H11	12	-831	-529	-333	-281
H12	12	-700	-436	-277	-216
A1	13	11309	5136	2911	3467
A2	13	6305	2781	2193	3791
A3	13	1773	722	1556	3962
A4	13	1558	594	1568	4161
A5	13	695	239	1502	4277
A6	13	1730	642	1299	3332
A7	13	1583	628	1531	4029
A8	13	2050	786	1499	3802
A9	13	1031	368	1263	3477
A10	13	8605	3737	2390	3486
A11	13	8702	3814	2447	3531
A12	13	6441	2940	2437	4335
B1	13	-977	-645	-409	-396
B2	13	-932	-632	-413	-345
B3	13	-872	-584	-372	-288
B4	13	12102	5357	3209	4142
B5	13	12952	5754	3408	4205
B6	13	5339	2270	2082	3915
B7	13	6229	2734	2332	4198
B8	13	9025	4017	2777	4254
B9	13	12982	5670	3217	3942
B10	13	10915	4755	2795	3675
B11	13	9787	4330	2544	3355
B12	13	9768	4363	2591	3437
C1	13	-815	-544	-345	-303
C2	13	-854	-561	-367	-318
C3	13	-594	-400	-250	-193
C4	13	12843	5474	3040	3558
C5	13	13259	5727	3126	3617
C6	13	14022	6018	3292	3835
C7	13	13219	5767	3156	3639
C8	13	14427	6371	3504	4024
C9	13	14270	6279	3428	3973
C10	13	14265	6223	3366	3842
C11	13	12921	5642	3048	3482
C12	13	12813	5822	3178	3665
D1	13	1177	9782	17596	13980
D2	13	720	6640	12104	10196
D3	13	625	6077	11423	9982
D4	13	1505	13152	19582	13979
D5	13	963	9850	15050	11085
D6	13	639	7397	11016	9098
D7	13	750	7820	12155	9508
D8	13	813	8383	13600	10843
D9	13	935	8710	13845	10820
D10	13	943	8781	14291	10935
D11	13	765	8293	13540	10414
D12	13	610	7761	13066	10097
E1	13	-786	-518	-354	-274
E2	13	-1022	-681	-454	-391
E3	13	-1010	-682	-447	-376
E4	13	1052	9947	16346	11822
E5	13	1167	11436	18841	13610
E6	13	927	10160	16546	12238
E7	13	1125	10953	17400	12087
E8	13	1175	11320	18587	13332
E9	13	905	10024	16361	11813
E10	13	1024	10658	17458	12447
E11	13	1002	10403	16699	11750
E12	13	823	10610	17713	12679
F1	13	-847	-555	-346	-291
F2	13	-811	-537	-346	-275
F3	13	-1060	-702	-463	-413
F4	13	1134	10820	18161	12846
F5	13	1094	11580	19358	13723
F6	13	961	10267	16720	11716
F7	13	1197	10882	17448	12155
F8	13	1163	10846	17922	12761
F9	13	885	10323	16911	11904
F10	13	1175	11250	18000	12683
F11	13	873	10284	16567	11706
F12	13	934	10009	16332	11712
G1	13	-770	-507	-311	-279
G2	13	-1042	-719	-484	-414
G3	13	-1022	-682	-420	-347
G4	13	-956	-658	-415	-363
G5	13	-828	-546	-352	-266
G6	13	-1044	-708	-456	-391
G7	13	-960	-620	-389	-326
G8	13	-881	-585	-379	-321
G9	13	-951	-598	-401	-340
G10	13	-975	-655	-420	-368
G11	13	-1027	-673	-441	-382
G12	13	-832	-548	-362	-290
H1	13	-887	-564	-359	-297
H2	13	-896	-605	-381	-315
H3	13	-1026	-692	-450	-395
H4	13	-954	-634	-416	-359
H5	13	-1085	-701	-443	-378
H6	13	-950	-575	-323	-288
H7	13	-961	-625	-403	-341
H8	13	-820	-527	-329	-292
H9	13	-1076	-695	-481	-406
H10	13	-882	-565	-348	-307
H11	13	-825	-523	-333	-286
H12	13	-689	-423	-268	-219
A1	14	11266	5104	2916	3471
A2	14	6318	2791	2182	3786
A3	14	1791	735	1553	3984
A4	14	1561	596	1579	4147
A5	14	689	239	1502	4278
A6	14	1764	651	1324	3348
A7	14	1569	626	1532	4022
A8	14	2045	798	1499	3784
A9	14	1055	366	1271	3513
A10	14	8544	3698	2382	3457
A11	14	8699	3832	2437	3541
A12	14	6433	2927	2426	4316
B1	14	-974	-625	-427	-400
B2	14	-934	-619	-404	-361
B3	14	-865	-574	-359	-287
B4	14	12150	5388	3226	4168
B5	14	13002	5785	3438	4225
B6	14	5355	2280	2094	3927
B7	14	6261	2746	2355	4231
B8	14	9066	4024	2801	4262
B9	14	12873	5606	3165	3874
B10	14	11006	4780	2808	3664
B11	14	9848	4357	2562	3364
B12	14	9803	4367	2606	3444
C1	14	-822	-536	-350	-296
C2	14	-852	-558	-371	-309
C3	14	-571	-381	-245	-199
C4	14	12886	5482	3049	3564
C5	14	13407	5802	3169	3657
C6	14	14095	6033	3302	3833
C7	14	13214	5752	3142	3614
C8	14	14452	6386	3505	4027
C9	14	14281	6284	3429	3956
C10	14	14407	6282	3375	3869
C11	14	12955	5673	3062	3496
C12	14	12857	5839	3194	3664
D1	14	1177	9803	17635	14016
D2	14	722	6668	12139	10198
D3	14	640	6168	11536	10084
D4	14	1590	13706	19836	14096
D5	14	1019	10223	15097	11039
D6	14	704	7809	11189	9189
D7	14	804	8115	12143	9439
D8	14	861	8776	13782	10924
D9	14	1010	9146	14139	10997
D10	14	1020	9100	14454	11031
D11	14	783	8551	13605	10428
D12	14	628	7960	13134	10147
E1	14	-787	-517	-340	-270
E2	14	-1017	-669	-443	-386
E3	14	-1003	-683	-446	-381
E4	14	1118	10243	16564	11970
E5	14	1193	11723	18959	13651
E6	14	992	10467	16690	12318
E7	14	1168	11232	17537	12165
E8	14	1233	11597	18703	13394
E9	14	912	10247	16419	11811
E10	14	1054	10854	17559	12502
E11	14	1038	10667	16853	11841
E12	14	856	10826	17869	12732
F1	14	-825	-545	-351	-286
F2	14	-832	-536	-342	-280
F3	14	-1075	-709	-449	-402
F4	14	1138	10883	18238	12886
F5	14	1084	11617	19372	13726
F6	14	987	10317	16784	11736
F7	14	1219	10922	17498	12170
F8	14	1159	10909	17990	12820
F9	14	908	10371	16933	11920
F10	14	1211	11469	18141	12765
F11	14	903	10480	16705	11798
F12	14	967	10208	16482	11822
G1	14	-769	-507	-325	-262
G2	14	-1040	-717	-481	-430
G3	14	-1008	-671	-420	-342
G4	14	-961	-653	-403	-347
G5	14	-837	-527	-356	-280
G6	14	-1042	-693	-444	-383
G7	14	-956	-625	-377	-320
G8	14	-872	-578	-362	-307
G9	14	-936	-608	-396	-331
G10	14	-968	-633	-412	-347
G11	14	-1003	-672	-439	-362
G12	14	-842	-531	-345	-280
H1	14	-880	-573	-362	-298
H2	14	-906	-583	-361	-305
H3	14	-1027	-679	-437	-390
H4	14	-957	-634	-409	-348
H5	14	-1077	-712	-453	-381
H6	14	-942	-564	-306	-275
H7	14	-955	-624	-400	-328
H8	14	-802	-536	-331	-284
H9	14	-1068	-689	-466	-398
H10	14	-856	-551	-341	-288
H11	14	-806	-511	-327	-284
H12	14	-675	-428	-273	-222
A1	15	11259	5119	2913	3463
A2	15	6354	2807	2210	3790
A3	15	1813	727	1561	3998
A4	15	1538	582	1550	4072
A5	15	710	236	1498	4263
A6	15	1766	657	1330	3338
A7	15	1576	641	1540	4040
A8	15	2056	787	1490	3791
A9	15	1052	363	1271	3492
A10	15	8583	3725	2386	3478
A11	15	8746	3829	2447	3537
A12	15	6432	2910	2430	4312
B1	15	-928	-639	-398	-408
B2	15	-915	-607	-401	-336
B3	15	-835	-554	-347	-298
B4	15	12178	5390	3195	4128
B5	15	12995	5796	3421	4219
B6	15	5384	2295	2101	3941
B7	15	6287	2751	2366	4234
B8	15	9120	4027	2813	4296
B9	15	13015	5689	3212	3921
B10	15	11030	4791	2828	3690
B11	15	9831	4354	2546	3346
B12	15	9846	4403	2629	3441
C1	15	-807	-520	-321	-274
C2	15	-844	-567	-356	-306
C3	15	-547	-360	-222	-175
C4	15	12708	5400	2986	3516
C5	15	13578	5884	3199	3695
C6	15	14142	6056	3312	3846
C7	15	13318	5821	3173	3649
C8	15	14544	6435	3515	4047
C9	15	14341	6322	3450	3976
C10	15	14461	6310	3399	3877
C11	15	13036	5704	3053	3508
C12	15	12916	5864	3214	3680
D1	15	1204	9845	17680	14030
D2	15	722	6637	12099	10162
D3	15	653	6174	11550	10099
D4	15	1658	14270	20119	14275
D5	15	1092	10794	15354	11174
D6	15	778	8265	11365	9284
D7	15	856	8510	12310	9517
D8	15	933	9196	13967	11034
D9	15	1059	9540	14209	10994
D10	15	1054	9459	14608	11120
D11	15	846	8956	13815	10563
D12	15	649	8271	13317	10240
E1	15	-770	-505	-320	-266
E2	15	-998	-658	-456	-387
E3	15	-1011	-669	-433	-385
E4	15	1145	10584	16852	12157
E5	15	1251	12127	19151	13729
E6	15	1029	10815	16781	12347
E7	15	1217	11581	17670	12240
E8	15	1295	11976	18859	13470
E9	15	998	10607	16587	11898
E10	15	1112	11182	17756	12606
E11	15	1099	10995	16980	11913
E12	15	899	11107	18005	12819
F1	15	-824	-543	-338	-271
F2	15	-812	-524	-327	-262
F3	15	-1058	-710	-462	-392
F4	15	1191	11093	18591	13165
F5	15	1104	11661	19360	13703
F6	15	990	10422	16875	11815
F7	15	1230	10960	17514	12186
F8	15	1178	10953	18019	12806
F9	15	892	10392	16910	11905
F10	15	1242	11718	18284	12831
F11	15	935	10755	16850	11856
F12	15	1010	10412	16617	11866
G1	15	-749	-497	-300	-249
G2	15	-1035	-701	-472	-434
G3	15	-1007	-657	-430	-346
G4	15	-955	-646	-416	-369
G5	15	-835	-533	-356	-266
G6	15	-1042	-692	-462	-375
G7	15	-950	-628	-372	-319
G8	15	-855	-570	-367	-306
G9	15	-921	-591	-380	-338
G10	15	-952	-624	-407	-347
G11	15	-995	-654	-432	-362
G12	15	-818	-537	-344	-284
H1	15	-862	-566	-345	-296
H2	15	-893	-591	-355	-306
H3	15	-1008	-664	-437	-381
H4	15	-943	-638	-399	-352
H5	15	-1059	-691	-441	-375
H6	15	-935	-569	-304	-270
H7	15	-935	-622	-396	-341
H8	15	-780	-514	-342	-269
H9	15	-1056	-683	-463	-392
H10	15	-847	-561	-350	-289
H11	15	-801	-507	-334	-274
H12	15	-654	-409	-264	-206
A1	16	11198	5073	2886	3443
A2	16	6353	2805	2201	3808
A3	16	1800	740	1553	3992
A4	16	1562	589	1544	4076
A5	16	720	255	1506	4289
A6	16	1791	680	1328	3368
A7	16	1606	613	1545	4046
A8	16	2060	798	1488	3800
A9	16	1052	378	1268	3508
A10	16	8628	3749	2389	3465
A11	16	8758	3840	2459	3537
A12	16	6404	2929	2435	4290
B1	16	-948	-633	-405	-391
B2	16	-916	-610	-411	-359
B3	16	-846	-539	-346	-279
B4	16	12207	5402	3220	4127
B5	16	13067	5821	3450	4236
B6	16	5400	2304	2095	3957
B7	16	6303	2777	2365	4260
B8	16	9150	4062	2822	4295
B9	16	13018	5682	3210	3911
B10	16	11065	4805	2831	3688
B11	16	9847	4363	2551	3347
B12	16	9881	4419	2622	3459
C1	16	-791	-533	-332	-297
C2	16	-822	-553	-361	-298
C3	16	-519	-330	-213	-163
C4	16	12758	5416	2992	3520
C5	16	13584	5898	3203	3697
C6	16	14220	6092	3328	3880
C7	16	13306	5815	3171	3655
C8	16	14597	6456	3532	4055
C9	16	14403	6336	3461	3981
C10	16	14504	6337	3398	3875
C11	16	13088	5732	3078	3507
C12	16	12949	5872	3206	3690
D1	16	1198	9862	17724	14083
D2	16	725	6709	12215	10277
D3	16	665	6236	11641	10161
D4	16	1737	14926	20447	14453
D5	16	1168	11399	15648	11322
D6	16	835	8700	11511	9318
D7	16	907	8951	12497	9622
D8	16	985	9675	14186	11132
D9	16	1119	9997	14370	11060
D10	16	1114	9865	14782	11191
D11	16	910	9352	13985	10623
D12	16	689	8550	13388	10261
E1	16	-772	-498	-321	-278
E2	16	-994	-650	-424	-380
E3	16	-992	-689	-430	-371
E4	16	1202	10978	16998	12227
E5	16	1317	12578	19311	13809
E6	16	1116	11348	17046	12468
E7	16	1283	12008	17860	12303
E8	16	1348	12457	19074	13563
E9	16	1049	11010	16730	11953
E10	16	1152	11543	17891	12674
E11	16	1144	11377	17126	11958
E12	16	934	11399	18101	12853
F1	16	-806	-541	-329	-266
F2	16	-813	-542	-344	-268
F3	16	-1043	-698	-452	-384
F4	16	1203	11197	18664	13205
F5	16	1119	11727	19384	13708
F6	16	1009	10482	16910	11814
F7	16	1242	11052	17593	12241
F8	16	1186	11034	18092	12848
F9	16	916	10488	16974	11938
F10	16	1306	12088	18428	12910
F11	16	998	11117	16985	11934
F12	16	1051	10684	16697	11898
G1	16	-750	-477	-303	-278
G2	16	-1023	-699	-464	-420
G3	16	-1012	-664	-433	-339
G4	16	-957	-646	-392	-345
G5	16	-832	-539	-338	-265
G6	16	-1044	-689	-442	-376
G7	16	-949	-613	-391	-327
G8	16	-852	-556	-364	-296
G9	16	-917	-589	-371	-336
G10	16	-928	-620	-396	-325
G11	16	-964	-624	-422	-347
G12	16	-806	-528	-336	-281
H1	16	-890	-563	-349	-292
H2	16	-877	-570	-367	-312
H3	16	-1002	-669	-429	-364
H4	16	-942	-622	-392	-344
H5	16	-1055	-692	-441	-369
H6	16	-926	-559	-297	-270
H7	16	-942	-619	-403	-338
H8	16	-768	-514	-333	-261
H9	16	-1056	-686	-459	-396
H10	16	-852	-546	-350	-290
H11	16	-783	-498	-306	-260
H12	16	-639	-403	-259	-212
A1	17	11143	5054	2871	3409
A2	17	6377	2807	2204	3805
A3	17	1800	758	1571	3987
A4	17	1590	596	1561	4113
A5	17	727	247	1503	4309
A6	17	1786	669	1323	3354
A7	17	1603	641	1546	4037
A8	17	2071	809	1511	3818
A9	17	1077	377	1272	3502
A10	17	8663	3762	2394	3502
A11	17	8807	3860	2467	3549
A12	17	6419	2912	2428	4287
B1	17	-923	-604	-411	-385
B2	17	-900	-582	-398	-340
B3	17	-823	-540	-335	-269
B4	17	12248	5438	3242	4133
B5	17	13118	5842	3459	4256
B6	17	5429	2317	2128	3954
B7	17	6363	2801	2377	4276
B8	17	9159	4062	2818	4285
B9	17	13087	5708	3222	3931
B10	17	11100	4828	2828	3688
B11	17	9878	4378	2546	3355
B12	17	9915	4443	2636	3463
C1	17	-813	-533	-326	-288
C2	17	-828	-536	-350	-294
C3	17	-487	-325	-200	-159
C4	17	12871	5476	3021	3551
C5	17	13555	5871	3199	3679
C6	17	14274	6121	3346	3885
C7	17	13420	5880	3203	3687
C8	17	14647	6477	3533	4041
C9	17	14469	6373	3460	4008
C10	17	14544	6347	3401	3876
C11	17	13206	5777	3101	3542
C12	17	12999	5910	3221	3695
D1	17	1227	9918	17819	14153
D2	17	740	6731	12236	10286
D3	17	651	6234	11618	10161
D4	17	1828	15603	20662	14530
D5	17	1271	12049	15968	11508
D6	17	882	9160	11669	9397
D7	17	971	9372	12652	9668
D8	17	1045	10130	14359	11197
D9	17	1186	10502	14580	11159
D10	17	1188	10322	14950	11253
D11	17	967	9865	14226	10764
D12	17	756	8969	13570	10347
E1	17	-746	-493	-322	-251
E2	17	-972	-649	-437	-365
E3	17	-986	-666	-429	-376
E4	17	1267	11435	17116	12263
E5	17	1395	13118	19502	13891
E6	17	1192	11871	17241	12562
E7	17	1352	12554	18134	12444
E8	17	1397	12958	19281	13652
E9	17	1106	11534	16977	12095
E10	17	1191	11945	17991	12711
E11	17	1225	11901	17385	12113
E12	17	1002	11840	18304	12953
F1	17	-799	-516	-321	-261
F2	17	-805	-525	-326	-258
F3	17	-1040	-692	-453	-385
F4	17	1200	11219	18580	13135
F5	17	1145	11893	19507	13776
F6	17	1014	10599	16979	11855
F7	17	1239	11157	17571	12222
F8	17	1195	11137	18101	12847
F9	17	942	10617	17067	11984
F10	17	1352	12540	18600	12980
F11	17	1053	11619	17242	12046
F12	17	1103	11121	16917	12018
G1	17	-736	-479	-299	-251
G2	17	-1026	-684	-465	-395
G3	17	-999	-658	-413	-340
G4	17	-934	-628	-400	-351
G5	17	-827	-529	-322	-260
G6	17	-1021	-689	-444	-382
G7	17	-935	-615	-389	-324
G8	17	-829	-547	-362	-288
G9	17	-885	-584	-382	-338
G10	17	-895	-607	-382	-324
G11	17	-958	-633	-415	-341
G12	17	-781	-522	-338	-276
H1	17	-871	-561	-362	-306
H2	17	-871	-559	-358	-300
H3	17	-996	-658	-422	-371
H4	17	-920	-618	-390	-359
H5	17	-1053	-703	-447	-364
H6	17	-924	-549	-287	-265
H7	17	-917	-599	-397	-325
H8	17	-741	-498	-315	-253
H9	17	-1051	-680	-451	-400
H10	17	-841	-541	-338	-279
H11	17	-770	-488	-304	-271
H12	17	-626	-384	-239	-204
A1	18	11116	5035	2854	3406
A2	18	6417	2831	2217	3806
A3	18	1835	768	1591	4012
A4	18	1589	585	1549	4074
A5	18	737	256	1526	4309
A6	18	1816	672	1335	3379
A7	18	1604	648	1547	4042
A8	18	2108	811	1502	3810
A9	18	1092	394	1269	3509
A10	18	8708	3790	2405	3491
A11	18	8798	3870	2457	3529
A12	18	6392	2913	2411	4272
B1	18	-933	-624	-403	-385
B2	18	-872	-587	-392	-322
B3	18	-818	-529	-331	-278
B4	18	12312	5434	3244	4137
B5	18	13168	5858	3461	4244
B6	18	5473	2324	2125	3978
B7	18	6381	2798	2403	4285
B8	18	9268	4124	2850	4328
B9	18	13138	5749	3235	3942
B10	18	11189	4855	2854	3700
B11	18	10005	4431	2589	3401
B12	18	9952	4451	2634	3483
C1	18	-770	-518	-322	-279
C2	18	-806	-531	-355	-293
C3	18	-437	-280	-196	-130
C4	18	12798	5436	3002	3523
C5	18	13675	5932	3224	3714
C6	18	14337	6145	3340	3868
C7	18	13407	5841	3195	3648
C8	18	14742	6544	3560	4082
C9	18	14572	6415	3489	4013
C10	18	14594	6366	3418	3888
C11	18	13178	5755	3099	3508
C12	18	13060	5944	3243	3707
D1	18	1222	9975	17867	14188
D2	18	747	6754	12259	10296
D3	18	658	6267	11662	10185
D4	18	1932	16276	20972	14688
D5	18	1335	12617	16173	11599
D6	18	970	9661	11882	9504
D7	18	1066	9947	12945	9851
D8	18	1144	10733	14661	11384
D9	18	1256	11046	14784	11249
D10	18	1256	10890	15184	11379
D11	18	1032	10284	14322	10766
D12	18	811	9400	13724	10398
E1	18	-734	-469	-315	-252
E2	18	-972	-652	-426	-368
E3	18	-977	-651	-435	-364
E4	18	1342	11991	17421	12434
E5	18	1469	13791	19849	14075
E6	18	1282	12535	17542	12708
E7	18	1444	13157	18407	12577
E8	18	1508	13601	19559	13798
E9	18	1193	12086	17247	12217
E10	18	1275	12496	18270	12838
E11	18	1276	12395	17541	12155
E12	18	1060	12302	18478	13029
F1	18	-782	-513	-316	-271
F2	18	-792	-525	-330	-265
F3	18	-1042	-687	-432	-380
F4	18	1260	11473	18854	13323
F5	18	1181	12121	19665	13886
F6	18	1040	10751	17003	11849
F7	18	1272	11313	17701	12288
F8	18	1242	11398	18305	12972
F9	18	965	10820	17163	12048
F10	18	1447	13096	18837	13090
F11	18	1121	12099	17416	12104
F12	18	1153	11541	17073	12076
G1	18	-712	-469	-286	-234
G2	18	-1004	-707	-460	-404
G3	18	-986	-648	-408	-351
G4	18	-914	-624	-389	-358
G5	18	-820	-534	-334	-272
G6	18	-1006	-660	-442	-376
G7	18	-923	-610	-379	-303
G8	18	-827	-531	-358	-285
G9	18	-893	-579	-365	-304
G10	18	-883	-572	-375	-321
G11	18	-919	-601	-394	-330
G12	18	-766	-508	-318	-255
H1	18	-858	-564	-350	-303
H2	18	-872	-569	-355	-302
H3	18	-982	-663	-413	-381
H4	18	-916	-601	-388	-347
H5	18	-1033	-695	-429	-373
H6	18	-903	-559	-282	-261
H7	18	-900	-588	-378	-320
H8	18	-726	-459	-278	-233
H9	18	-1026	-675	-440	-380
H10	18	-813	-536	-336	-275
H11	18	-770	-490	-298	-252
H12	18	-589	-362	-223	-187
A1	19	11120	5044	2855	3391
A2	19	6449	2841	2227	3825
A3	19	1845	776	1570	4020
A4	19	1619	600	1566	4076
A5	19	758	270	1517	4313
A6	19	1838	693	1349	3370
A7	19	1644	661	1552	4056
A8	19	2133	817	1518	3828
A9	19	1119	390	1275	3523
A10	19	8765	3805	2416	3513
A11	19	8858	3876	2481	3538
A12	19	6411	2916	2408	4274
B1	19	-899	-591	-383	-365
B2	19	-861	-570	-365	-326
B3	19	-798	-530	-321	-261
B4	19	12346	5473	3252	4142
B5	19	13147	5839	3455	4218
B6	19	5520	2367	2131	3977
B7	19	6447	2821	2411	4293
B8	19	9322	4138	2858	4332
B9	19	13169	5761	3236	3937
B10	19	11226	4875	2859	3708
B11	19	9971	4413	2574	3365
B12	19	9990	4473	2645	3477
C1	19	-757	-491	-320	-278
C2	19	-796	-525	-348	-275
C3	19	-400	-264	-173	-114
C4	19	12854	5472	3001	3527
C5	19	13833	6008	3277	3760
C6	19	14408	6174	3370	3909
C7	19	13489	5881	3198	3665
C8	19	14823	6558	3575	4103
C9	19	14608	6439	3506	4002
C10	19	14670	6407	3446	3902
C11	19	13229	5786	3094	3517
C12	19	13081	5933	3247	3706
D1	19	1216	9942	17796	14137
D2	19	762	6790	12305	10328
D3	19	676	6310	11724	10231
D4	19	2024	16965	21221	14797
D5	19	1432	13266	16454	11706
D6	19	1031	10147	12102	9608
D7	19	1131	10456	13119	9926
D8	19	1199	11237	14862	11449
D9	19	1364	11693	15137	11425
D10	19	1331	11426	15378	11454
D11	19	1101	10840	14526	10864
D12	19	864	9843	13868	10464
E1	19	-732	-479	-317	-256
E2	19	-951	-628	-423	-349
E3	19	-968	-644	-430	-359
E4	19	1425	12566	17651	12533
E5	19	1556	14310	19867	14004
E6	19	1351	13133	17745	12779
E7	19	1526	13741	18609	12668
E8	19	1598	14248	19830	13923
E9	19	1278	12695	17504	12353
E10	19	1353	13067	18479	12938
E11	19	1360	12991	17789	12276
E12	19	1114	12822	18645	13080
F1	19	-784	-511	-303	-264
F2	19	-783	-508	-322	-255
F3	19	-1026	-689	-441	-378
F4	19	1268	11661	18934	13363
F5	19	1193	12347	19673	13836
F6	19	1066	10966	17077	11884
F7	19	1301	11563	17819	12332
F8	19	1285	11657	18411	13030
F9	19	990	11105	17295	12100
F10	19	1523	13698	19054	13177
F11	19	1202	12706	17631	12220
F12	19	1219	12056	17227	12149
G1	19	-722	-476	-293	-256
G2	19	-996	-678	-466	-392
G3	19	-994	-655	-420	-341
G4	19	-907	-605	-394	-336
G5	19	-799	-515	-322	-259
G6	19	-992	-661	-454	-373
G7	19	-925	-618	-374	-312
G8	19	-820	-530	-354	-283
G9	19	-875	-562	-359	-312
G10	19	-856	-556	-366	-299
G11	19	-895	-585	-387	-316
G12	19	-757	-490	-316	-267
H1	19	-840	-552	-348	-293
H2	19	-866	-548	-346	-303
H3	19	-974	-658	-415	-367
H4	19	-920	-587	-390	-334
H5	19	-1054	-684	-425	-370
H6	19	-896	-534	-274	-252
H7	19	-885	-576	-379	-321
H8	19	-679	-449	-294	-235
H9	19	-1017	-661	-446	-379
H10	19	-817	-509	-313	-285
H11	19	-736	-479	-298	-250
H12	19	-561	-367	-216	-191
A1	20	11029	4998	2834	3376
A2	20	6467	2859	2239	3837
A3	20	1832	772	1575	4015
A4	20	1683	654	1581	4123
A5	20	798	274	1526	4319
A6	20	1880	720	1341	3377
A7	20	1692	679	1568	4062
A8	20	2196	853	1529	3857
A9	20	1137	413	1303	3557
A10	20	8842	3840	2424	3523
A11	20	8889	3902	2476	3542
A12	20	6406	2926	2422	4274
B1	20	-874	-588	-371	-364
B2	20	-839	-551	-367	-304
B3	20	-781	-510	-309	-255
B4	20	12456	5517	3267	4163
B5	20	13266	5902	3482	4232
B6	20	5589	2385	2157	3996
B7	20	6503	2863	2429	4285
B8	20	9321	4129	2857	4321
B9	20	13251	5782	3238	3928
B10	20	11259	4904	2874	3721
B11	20	10069	4460	2608	3400
B12	20	10039	4492	2670	3497
C1	20	-752	-490	-317	-266
C2	20	-773	-513	-338	-291
C3	20	-349	-228	-156	-105
C4	20	12981	5516	3027	3567
C5	20	13857	6015	3261	3753
C6	20	14469	6210	3381	3902
C7	20	13558	5941	3239	3699
C8	20	14859	6567	3563	4090
C9	20	14722	6481	3516	4033
C10	20	14689	6411	3435	3891
C11	20	13230	5792	3103	3505
C12	20	13127	5960	3239	3715
D1	20	1230	10020	17964	14267
D2	20	752	6793	12307	10331
D3	20	651	6272	11643	10166
D4	20	2123	17673	21474	14886
D5	20	1540	13965	16803	11906
D6	20	1094	10606	12254	9679
D7	20	1200	10985	13368	10064
D8	20	1274	11767	15033	11509
D9	20	1471	12348	15449	11607
D10	20	1419	12019	15612	11573
D11	20	1169	11380	14729	10952
D12	20	941	10357	14066	10566
E1	20	-700	-458	-301	-234
E2	20	-951	-621	-417	-348
E3	20	-954	-634	-418	-357
E4	20	1498	13130	17767	12534
E5	20	1667	15135	20318	14241
E6	20	1456	13808	18024	12916
E7	20	1617	14415	18939	12832
E8	20	1662	14857	20028	14000
E9	20	1378	13360	17805	12503
E10	20	1449	13691	18743	13074
E11	20	1436	13604	18031	12361
E12	20	1223	13443	18911	13216
F1	20	-765	-508	-302	-251
F2	20	-768	-493	-310	-251
F3	20	-1009	-677	-431	-370
F4	20	1306	11914	18949	13325
F5	20	1266	12764	19925	13990
F6	20	1128	11343	17286	11981
F7	20	1344	11903	17929	12382
F8	20	1333	12005	18524	13059
F9	20	1061	11474	17490	12224
F10	20	1623	14366	19318	13307
F11	20	1300	13331	17860	12307
F12	20	1304	12642	17465	12261
G1	20	-695	-456	-274	-232
G2	20	-976	-666	-437	-386
G3	20	-970	-641	-407	-340
G4	20	-902	-601	-383	-344
G5	20	-795	-522	-336	-266
G6	20	-971	-662	-433	-357
G7	20	-922	-603	-365	-305
G8	20	-800	-518	-343	-275
G9	20	-877	-571	-368	-310
G10	20	-820	-538	-344	-279
G11	20	-850	-555	-369	-321
G12	20	-716	-475	-301	-247
H1	20	-842	-530	-340	-292
H2	20	-855	-564	-340	-303
H3	20	-982	-654	-399	-357
H4	20	-906	-603	-385	-340
H5	20	-1028	-674	-428	-354
H6	20	-893	-522	-279	-248
H7	20	-879	-575	-373	-319
H8	20	-649	-430	-274	-222
H9	20	-1010	-671	-430	-373
H10	20	-795	-512	-328	-259
H11	20	-715	-445	-291	-235
H12	20	-538	-326	-195	-174
A1	21	11028	4994	2826	3388
A2	21	6491	2853	2242	3836
A3	21	1841	765	1588	4025
A4	21	1785	709	1614	4136
A5	21	862	314	1547	4324
A6	21	1960	745	1364	3397
A7	21	1776	713	1582	4076
A8	21	2267	882	1541	3848
A9	21	1182	440	1314	3539
A10	21	8945	3889	2470	3554
A11	21	8958	3931	2493	3548
A12	21	6442	2923	2431	4282
B1	21	-867	-576	-370	-374
B2	21	-829	-559	-357	-305
B3	21	-746	-506	-301	-249
B4	21	12619	5601	3317	4193
B5	21	13369	5948	3487	4251
B6	21	5707	2424	2173	4009
B7	21	6640	2929	2437	4299
B8	21	9482	4198	2887	4320
B9	21	13349	5835	3284	3978
B10	21	11323	4919	2871	3721
B11	21	10118	4483	2609	3404
B12	21	10113	4522	2681	3494
C1	21	-735	-479	-300	-257
C2	21	-765	-494	-322	-264
C3	21	-308	-208	-121	-88
C4	21	13108	5584	3076	3571
C5	21	13915	6053	3265	3758
C6	21	14540	6240	3389	3912
C7	21	13569	5917	3205	3671
C8	21	14929	6619	3606	4104
C9	21	14762	6486	3530	4032
C10	21	14745	6442	3437	3886
C11	21	13313	5828	3116	3529
C12	21	13194	5993	3267	3723
D1	21	1246	10099	18059	14324
D2	21	770	6821	12376	10372
D3	21	659	6291	11678	10193
D4	21	2216	18375	21712	14964
D5	21	1639	14616	17072	12040
D6	21	1162	11061	12454	9783
D7	21	1290	11559	13620	10171
D8	21	1347	12339	15250	11632
D9	21	1519	12817	15545	11620
D10	21	1475	12569	15809	11654
D11	21	1245	11933	14936	11009
D12	21	1017	10899	14314	10679
E1	21	-688	-451	-294	-234
E2	21	-930	-641	-418	-359
E3	21	-936	-632	-416	-345
E4	21	1578	13757	17982	12621
E5	21	1777	15869	20597	14384
E6	21	1533	14504	18275	13044
E7	21	1711	15054	19119	12892
E8	21	1751	15568	20332	14137
E9	21	1465	14001	18085	12633
E10	21	1536	14334	19042	13212
E11	21	1529	14210	18212	12469
E12	21	1303	14072	19172	13324
F1	21	-756	-505	-300	-237
F2	21	-765	-493	-320	-243
F3	21	-1009	-666	-433	-363
F4	21	1328	12220	19000	13310
F5	21	1327	13276	20138	14106
F6	21	1175	11740	17408	12031
F7	21	1425	12384	18194	12517
F8	21	1396	12523	18785	13208
F9	21	1123	11913	17657	12295
F10	21	1712	15049	19587	13421
F11	21	1383	13985	18090	12404
F12	21	1388	13274	17743	12372
G1	21	-687	-461	-290	-228
[truncated: 1,847 more rows]

## Sheet: Multicomponent Data
Block Type	96well
Chemistry	TAQMAN
Experiment File Name	C:\Users\11193327\Downloads\SK10042014 (2).eds
Experiment Run End Time	Not Started
Instrument Type	steponeplus
Passive Reference	ROX
Well	Cycle	FAM	ROX
A1	1	5006.77	2902.48
A2	1	2582.39	3340.89
A3	1	512.262	3652.84
A4	1	400.654	3795.03
A5	1	38.8297	4029.28
A6	1	534.196	3056.35
A7	1	418.043	3698.71
A8	1	654.264	3526
A9	1	223.094	3244.34
A10	1	3527.5	2869.34
A11	1	3654.9	2968.32
A12	1	2658.07	3884.57
B1	1
B2	1
B3	1
B4	1	4967.51	3243.24
B5	1	5386.28	3373.5
B6	1	2073.62	3430.15
B7	1	2462.66	3697.09
B8	1	3695.72	3592.56
B9	1	5333	3017.64
B10	1	4486.4	2880.81
B11	1	4081.75	2694.23
B12	1	4051.01	2777.55
C1	1
C2	1
C3	1
C4	1	5139.76	2600.59
C5	1	5494.28	2740.47
C6	1	5695.64	2864.25
C7	1	5399.96	2719.67
C8	1	5935.73	3044.35
C9	1	5897.22	2998.46
C10	1	5958.17	2906.78
C11	1	5423.88	2693.82
C12	1	5332.04	2795.48
D1	1	1657.22	16897.7
D2	1	1130.22	12048.7
D3	1	1021.55	11958.9
D4	1	2064.43	17159.8
D5	1	1478.99	13128
D6	1	909.107	10513.4
D7	1	1153.12	11232.8
D8	1	1247.35	12864.6
D9	1	1357.81	12851.7
D10	1	1540.67	13440.7
D11	1	1319.79	12585
D12	1	1169.47	12215.7
E1	1
E2	1
E3	1
E4	1	1793.2	15089.1
E5	1	2045.68	16906.2
E6	1	1686.54	14991.8
E7	1	1965.58	15275.3
E8	1	1979.08	16551.9
E9	1	1696.3	14630.1
E10	1	1858.21	15406.3
E11	1	1804.69	14713.5
E12	1	1694.93	15670.2
F1	1
F2	1
F3	1
F4	1	2076.04	16626.2
F5	1	2110.34	16956.7
F6	1	1853.77	14656.1
F7	1	2037.99	15142.7
F8	1	1992.71	15856.7
F9	1	1839.07	14970.3
F10	1	2031.7	15788.8
F11	1	1721.62	14453.5
F12	1	1668.85	14474.2
G1	1
G2	1
G3	1
G4	1
G5	1
G6	1
G7	1
G8	1
G9	1
G10	1
G11	1
G12	1
H1	1
H2	1
H3	1
H4	1
H5	1
H6	1
H7	1
H8	1
H9	1
H10	1
H11	1
H12	1
A1	2	5051.28	2903.3
A2	2	2660.99	3391.16
A3	2	561.953	3726.72
A4	2	442.07	3850.87
A5	2	74.3456	4118.68
A6	2	567.167	3120.92
A7	2	457.904	3774.94
A8	2	685.335	3578.02
A9	2	263.426	3345.53
A10	2	3582.49	2895.48
A11	2	3736.99	3001.95
A12	2	2707.67	3934.6
B1	2
B2	2
B3	2
B4	2	5038.81	3282.98
B5	2	5451.15	3393.21
B6	2	2116.11	3459.22
B7	2	2507.71	3706.31
B8	2	3742.3	3643.82
B9	2	5321.7	3010.34
B10	2	4529.34	2903.87
B11	2	4093.15	2693.34
B12	2	4145.52	2827.94
C1	2
C2	2
C3	2
C4	2	5175.14	2604.2
C5	2	5466.45	2708.53
C6	2	5783.02	2881
C7	2	5435.02	2732.13
C8	2	5995.19	3085.62
C9	2	5907.8	2994.88
C10	2	5965.64	2939.65
C11	2	5441.36	2672.54
C12	2	5465.55	2874.2
D1	2	1699.05	16902
D2	2	1135.18	12020
D3	2	1026.54	11906.4
D4	2	2068.28	17161.8
D5	2	1482.48	13097.3
D6	2	936.419	10561.4
D7	2	1169.04	11293.5
D8	2	1269.41	12957.3
D9	2	1371.65	12973.9
D10	2	1524.26	13371.6
D11	2	1326.12	12601.5
D12	2	1217.14	12384.9
E1	2
E2	2
E3	2
E4	2	1791.42	15065.2
E5	2	2035.46	16778.7
E6	2	1695.4	15017.1
E7	2	1958.47	15234.7
E8	2	1988.41	16580.5
E9	2	1694.15	14577.9
E10	2	1858.52	15399.7
E11	2	1809.29	14687.8
E12	2	1772.54	15991.6
F1	2
F2	2
F3	2
F4	2	2076.92	16651.3
F5	2	2103.33	16924.8
F6	2	1900.33	14851.3
F7	2	2042.9	15172.5
F8	2	1996.05	15927.5
F9	2	1818.11	14877.1
F10	2	2037.99	15813.1
F11	2	1742.82	14477.1
F12	2	1738.16	14754.1
G1	2
G2	2
G3	2
G4	2
G5	2
G6	2
G7	2
G8	2
G9	2
G10	2
G11	2
G12	2
H1	2
H2	2
H3	2
H4	2
H5	2
H6	2
H7	2
H8	2
H9	2
H10	2
H11	2
H12	2
A1	3	5099.88	2926.15
A2	3	2713.29	3435.35
A3	3	585.026	3789.51
A4	3	463.398	3905.91
A5	3	83.2869	4145.43
A6	3	589.401	3136.04
A7	3	486.155	3829.9
A8	3	705.903	3607.33
A9	3	281.368	3384.68
A10	3	3656.59	2937.88
A11	3	3780.96	3034.76
A12	3	2736.47	3961.73
B1	3
B2	3
B3	3
B4	3	5097.29	3317.61
B5	3	5499.35	3395.51
B6	3	2139.75	3501.94
B7	3	2529.52	3728.81
B8	3	3779.54	3667.96
B9	3	5418.45	3057.08
B10	3	4587.71	2935.98
B11	3	4131.83	2704.97
B12	3	4206.19	2854.96
C1	3
C2	3
C3	3
C4	3	5247.17	2652.21
C5	3	5571.52	2759.58
C6	3	5867.02	2913.89
C7	3	5529.13	2759.63
C8	3	6058.35	3087.25
C9	3	5983.91	3026.37
C10	3	6054.29	2953.77
C11	3	5473.29	2685.53
C12	3	5540	2891.94
D1	3	1735.93	16955.7
D2	3	1157.12	12142.2
D3	3	1039.24	11965.1
D4	3	2090.16	17171.6
D5	3	1517.05	13290.7
D6	3	948.903	10618.5
D7	3	1190.59	11421
D8	3	1275.33	13003.4
D9	3	1395.11	13110.3
D10	3	1536.46	13386.7
D11	3	1338.11	12645.2
D12	3	1238.21	12464.5
E1	3
E2	3
E3	3
E4	3	1803.3	15033
E5	3	2052.86	16872.5
E6	3	1719.05	15071.3
E7	3	1973.56	15292.5
E8	3	2008.71	16609.4
E9	3	1700.93	14629.7
E10	3	1882.65	15488.6
E11	3	1812.63	14673.6
E12	3	1810.93	16100.8
F1	3
F2	3
F3	3
F4	3	2076.26	16615.7
F5	3	2138.03	17093.7
F6	3	1895.03	14794.7
F7	3	2065.74	15218.7
F8	3	2022.05	16024.4
F9	3	1835.26	14951.9
F10	3	2057.71	15927.1
F11	3	1744.08	14524.9
F12	3	1770.25	14898
G1	3
G2	3
G3	3
G4	3
G5	3
G6	3
G7	3
G8	3
G9	3
G10	3
G11	3
G12	3
H1	3
H2	3
H3	3
H4	3
H5	3
H6	3
H7	3
H8	3
H9	3
H10	3
H11	3
H12	3
A1	4	5100.35	2909.74
A2	4	2726.29	3451.32
A3	4	596.574	3819.28
A4	4	477.198	3908.48
A5	4	94.8156	4208.67
A6	4	602.659	3177.9
A7	4	502.447	3849.95
A8	4	723.631	3631.68
A9	4	283.506	3388.45
A10	4	3722.6	2981.45
A11	4	3817.72	3050.35
A12	4	2763.19	3980.21
B1	4
B2	4
B3	4
B4	4	5151.31	3325.51
B5	4	5529.44	3401.1
B6	4	2160.93	3524.81
B7	4	2557.9	3731.71
B8	4	3780.83	3647.19
B9	4	5459.54	3067.02
B10	4	4621.3	2943.37
B11	4	4141.74	2694.9
B12	4	4233.69	2862.47
C1	4
C2	4
C3	4
C4	4	5282.06	2665.75
C5	4	5660.46	2779.51
C6	4	5959.51	2939.98
C7	4	5618.75	2792.09
C8	4	6097.66	3075.65
C9	4	6048.34	3028.8
C10	4	6104.04	2956.78
C11	4	5497.86	2662.32
C12	4	5586.96	2894.88
D1	4	1779.47	17013.4
D2	4	1171.4	12201.3
D3	4	1037.5	11995.7
D4	4	2113.84	17286
D5	4	1530.42	13271.5
D6	4	965.009	10674.7
D7	4	1212.08	11478
D8	4	1281.69	12997.3
D9	4	1407.11	13085.4
D10	4	1541.53	13424.1
D11	4	1348.73	12642.7
D12	4	1271.32	12551
E1	4
E2	4
E3	4
E4	4	1820.59	15175.4
E5	4	2061.04	16811.3
E6	4	1735.48	15177.9
E7	4	1994.31	15353.1
E8	4	2015.5	16647.3
E9	4	1717.95	14701.8
E10	4	1895.32	15584.8
E11	4	1825.14	14742.6
E12	4	1847.6	16253.7
F1	4
F2	4
F3	4
F4	4	2098.87	16771.4
F5	4	2144.65	17092.7
F6	4	1901.08	14821.7
F7	4	2084.93	15303.4
F8	4	2028.66	16045
F9	4	1864.84	15058.6
F10	4	2070.48	15970.5
F11	4	1775.29	14645.6
F12	4	1810.34	15020.4
G1	4
G2	4
G3	4
G4	4
G5	4
G6	4
G7	4
G8	4
G9	4
G10	4
G11	4
G12	4
H1	4
H2	4
H3	4
H4	4
H5	4
H6	4
H7	4
H8	4
H9	4
H10	4
H11	4
H12	4
A1	5	5113.66	2903.28
A2	5	2744.11	3465.18
A3	5	604.027	3801.24
A4	5	486.626	3931.23
A5	5	101.016	4191.47
A6	5	604.813	3161.42
A7	5	504.337	3841.67
A8	5	732.054	3633.86
A9	5	298.868	3390.02
A10	5	3692.09	2958.91
A11	5	3831.07	3050.52
A12	5	2771.19	3983.99
B1	5
B2	5
B3	5
B4	5	5185.05	3343.22
B5	5	5566.09	3399.88
B6	5	2182.31	3523.64
B7	5	2592.97	3767.11
B8	5	3806.56	3659.74
B9	5	5518.86	3103.8
B10	5	4681.78	2967.02
B11	5	4207.2	2735.22
B12	5	4252.13	2865.65
C1	5
C2	5
C3	5
C4	5	5338.17	2679.24
C5	5	5728.52	2803.43
C6	5	6014.85	2964.93
C7	5	5670.06	2829.96
C8	5	6154.1	3100.39
C9	5	6124.44	3067.39
C10	5	6174.92	2972.56
C11	5	5497.59	2660.55
C12	5	5599.8	2906.36
D1	5	1800.15	17048
D2	5	1179.4	12286
D3	5	1046.16	12039.9
D4	5	2132.28	17322.2
D5	5	1534.73	13344.8
D6	5	982.701	10754.9
D7	5	1215.84	11485.2
D8	5	1306.25	13074
D9	5	1413.23	13125.7
D10	5	1568.5	13539.9
D11	5	1347.27	12619.2
D12	5	1272.96	12540.5
E1	5
E2	5
E3	5
E4	5	1836.32	15214.2
E5	5	2069.8	16911.3
E6	5	1735.63	15162.6
E7	5	2006.85	15381.9
E8	5	2035.3	16738.9
E9	5	1736.05	14815.5
E10	5	1917.13	15665.5
E11	5	1834.18	14748.6
E12	5	1859.42	16265.9
F1	5
F2	5
F3	5
F4	5	2120.27	16796.9
F5	5	2156.05	17195.9
F6	5	1917.99	14902
F7	5	2084.66	15290.4
F8	5	2047.43	16177.6
F9	5	1872.8	15126
F10	5	2090.38	16078.3
F11	5	1784.68	14673.1
F12	5	1816.81	14953
G1	5
G2	5
G3	5
G4	5
G5	5
G6	5
G7	5
G8	5
G9	5
G10	5
G11	5
G12	5
H1	5
H2	5
H3	5
H4	5
H5	5
H6	5
H7	5
H8	5
H9	5
H10	5
H11	5
H12	5
A1	6	5110.04	2887.4
A2	6	2757.38	3462.66
A3	6	598.87	3787.47
A4	6	488.12	3940.81
A5	6	107.196	4184.04
A6	6	606.554	3183.18
A7	6	507.787	3869.94
A8	6	722.747	3588.86
A9	6	292.057	3386.13
A10	6	3707.59	2969.64
A11	6	3845.64	3058.04
A12	6	2779.98	3995.68
B1	6
B2	6
B3	6
B4	6	5213.96	3348.61
B5	6	5591.71	3419.76
B6	6	2198.24	3541.94
B7	6	2599.46	3774.12
B8	6	3864.85	3715.18
B9	6	5554.73	3089.7
B10	6	4718.59	2968.08
B11	6	4227.74	2758.91
B12	6	4252.16	2857.49
C1	6
C2	6
C3	6
C4	6	5398.34	2700.19
C5	6	5778.57	2830.36
C6	6	6061.31	2969.89
C7	6	5740.95	2874.68
C8	6	6223	3130.31
C9	6	6161.65	3074.43
C10	6	6213.44	2985.41
C11	6	5552.31	2682.73
C12	6	5610.51	2902.97
D1	6	1833.25	17181.9
D2	6	1193.27	12303.1
D3	6	1045.62	12042.3
D4	6	2166.4	17387.8
D5	6	1550.86	13367.5
D6	6	1007.63	10805
D7	6	1228.66	11510.7
D8	6	1318.54	13174.9
D9	6	1430.52	13266.2
D10	6	1574.88	13602.3
D11	6	1363.9	12710.2
D12	6	1284.46	12562.4
E1	6
E2	6
E3	6
E4	6	1851.57	15225.9
E5	6	2079.73	16934.2
E6	6	1765.78	15341.2
E7	6	2020.02	15391.3
E8	6	2053.65	16838.7
E9	6	1750.45	14894.2
E10	6	1930.65	15723.9
E11	6	1846.25	14789.3
E12	6	1869.62	16277.4
F1	6
F2	6
F3	6
F4	6	2121.72	16796.8
F5	6	2174.99	17285.1
F6	6	1936.24	14973.1
F7	6	2100.38	15317.1
F8	6	2066.84	16235.4
F9	6	1887.92	15173.2
F10	6	2101.42	16132.5
F11	6	1793.91	14692.5
F12	6	1831.01	15015
G1	6
G2	6
G3	6
G4	6
G5	6
G6	6
G7	6
G8	6
G9	6
G10	6
G11	6
G12	6
H1	6
H2	6
H3	6
H4	6
H5	6
H6	6
H7	6
H8	6
H9	6
H10	6
H11	6
H12	6
A1	7	5121.44	2887.65
A2	7	2743.6	3441.94
A3	7	603.722	3778.78
A4	7	484.879	3905.82
A5	7	107.854	4182.22
A6	7	616.889	3169.89
A7	7	496.684	3853.66
A8	7	724.898	3622.52
A9	7	295.185	3402.46
A10	7	3682.82	2937.09
A11	7	3851.28	3049.43
A12	7	2785.23	3990.42
B1	7
B2	7
B3	7
B4	7	5240.67	3341.9
B5	7	5636.54	3445.67
B6	7	2205.95	3540.83
B7	7	2615.14	3813.45
B8	7	3858.26	3694.04
B9	7	5599.5	3095.13
B10	7	4740.21	2978.88
B11	7	4245.45	2749.18
B12	7	4256.46	2855.55
C1	7
C2	7
C3	7
C4	7	5415.36	2683.46
C5	7	5792.13	2818.76
C6	7	6093.19	2975.35
C7	7	5753.87	2857.51
C8	7	6242.34	3139.67
C9	7	6215.95	3089.64
C10	7	6256.56	3006.63
C11	7	5595.6	2700.2
C12	7	5621.98	2904.12
D1	7	1862.47	17339.4
D2	7	1196.69	12342.1
D3	7	1062.73	12106.4
D4	7	2204.61	17525
D5	7	1578.68	13446.6
D6	7	1022.37	10843.6
D7	7	1227.53	11427.8
D8	7	1326.01	13147.3
D9	7	1444.94	13297.3
D10	7	1594.25	13659.1
D11	7	1380.19	12765.7
D12	7	1288.76	12561.3
E1	7
E2	7
E3	7
E4	7	1857.18	15297.2
E5	7	2097.51	17022.9
E6	7	1758.73	15295.4
E7	7	2026.96	15416.8
E8	7	2052.31	16842.2
E9	7	1772.41	14968.5
E10	7	1941.65	15786.7
E11	7	1867.64	14853.8
E12	7	1880.18	16313.7
F1	7
F2	7
F3	7
F4	7	2140.96	16920.9
F5	7	2194.27	17414.1
F6	7	1942.89	15043
F7	7	2109.76	15388.5
F8	7	2062.63	16220.4
F9	7	1894.38	15208
F10	7	2114.89	16205.1
F11	7	1820.1	14799.1
F12	7	1843.23	15045.3
G1	7
G2	7
G3	7
G4	7
G5	7
G6	7
G7	7
G8	7
G9	7
G10	7
G11	7
G12	7
H1	7
H2	7
H3	7
H4	7
H5	7
H6	7
H7	7
H8	7
H9	7
H10	7
H11	7
H12	7
A1	8	5119	2885.02
A2	8	2749.82	3438.83
A3	8	609.915	3776.61
A4	8	488.83	3926.65
A5	8	117.503	4180.73
A6	8	620.201	3169.94
A7	8	516.332	3872.89
A8	8	730.161	3617.25
A9	8	305.734	3391.98
A10	8	3694.27	2948.91
A11	8	3870.94	3064.93
A12	8	2799.64	4012.1
B1	8
B2	8
B3	8
B4	8	5268.36	3357.15
B5	8	5642.32	3435.31
B6	8	2222.18	3577.79
B7	8	2632.68	3807.77
B8	8	3880.41	3686.6
B9	8	5639.03	3116.14
B10	8	4782.03	3017.75
B11	8	4262.26	2749.73
B12	8	4264.44	2857.9
C1	8
C2	8
C3	8
C4	8	5455.8	2700.19
C5	8	5858.38	2835.34
C6	8	6135.84	2977.37
C7	8	5772.27	2834.92
C8	8	6279.47	3139.52
C9	8	6280.54	3123.05
C10	8	6291.52	3000.2
C11	8	5637.91	2711.71
C12	8	5632.46	2923.35
D1	8	1877.88	17380.8
D2	8	1201.77	12385.2
D3	8	1060.4	12097.3
D4	8	2244.86	17598.8
D5	8	1599.65	13521.1
D6	8	1062.05	10959.7
D7	8	1259.38	11558.9
D8	8	1344.71	13199.6
D9	8	1470.28	13372.3
D10	8	1604.27	13720.6
D11	8	1401.36	12830.3
D12	8	1297.17	12564.9
E1	8
E2	8
E3	8
E4	8	1881.58	15395.7
E5	8	2110.35	17026.4
E6	8	1800.16	15436.3
E7	8	2037.25	15372
E8	8	2072.21	16920
E9	8	1776.44	14972.5
E10	8	1960.26	15859.4
E11	8	1887.15	14961.1
E12	8	1895.91	16312.2
F1	8
F2	8
F3	8
F4	8	2153.78	16914.8
F5	8	2202.48	17414.5
F6	8	1957.71	15112.5
F7	8	2122.94	15418.1
F8	8	2078.98	16277.4
F9	8	1899.18	15215.8
F10	8	2139.54	16242.4
F11	8	1851.5	14933.3
F12	8	1859.99	15078.7
G1	8
G2	8
G3	8
G4	8
G5	8
G6	8
G7	8
G8	8
G9	8
G10	8
G11	8
G12	8
H1	8
H2	8
H3	8
H4	8
H5	8
H6	8
H7	8
H8	8
H9	8
H10	8
H11	8
H12	8
A1	9	5096.1	2852.85
A2	9	2736.94	3415.96
A3	9	617.802	3788.08
A4	9	503.197	4007.56
A5	9	110.346	4182.22
A6	9	618.467	3185.45
A7	9	522.497	3870.21
A8	9	731.455	3627.6
A9	9	299.369	3405.59
A10	9	3697.45	2950.01
A11	9	3851.19	3032.41
A12	9	2800.62	3999.88
B1	9
B2	9
B3	9
B4	9	5288.69	3403.72
B5	9	5668.98	3451.98
B6	9	2237.15	3583.42
B7	9	2645.45	3831.69
B8	9	3899.65	3694.53
B9	9	5641.45	3123.19
B10	9	4796.84	3016.11
B11	9	4274.12	2773.54
B12	9	4269.02	2860.13
C1	9
C2	9
C3	9
C4	9	5605.46	2771.61
C5	9	5866.95	2836.1
C6	9	6163.07	2979.67
C7	9	5819.53	2873.57
C8	9	6312.48	3146.43
C9	9	6287.8	3123.42
C10	9	6326.12	3015.92
C11	9	5607.47	2671.91
C12	9	5652.88	2926.23
D1	9	1881.8	17422
D2	9	1224.31	12467.5
D3	9	1072.87	12186.6
D4	9	2297.5	17494.9
D5	9	1629.77	13591.6
D6	9	1088.23	10932.6
D7	9	1262.21	11446.1
D8	9	1371.69	13308.9
D9	9	1494.46	13408.3
D10	9	1608.92	13749
D11	9	1398.75	12745.8
D12	9	1313.97	12606.5
E1	9
E2	9
E3	9
E4	9	1875.2	15079.8
E5	9	2122.66	17155.2
E6	9	1797.5	15400.6
E7	9	2045.26	15405.3
E8	9	2088.5	16982.2
E9	9	1795.44	15019.5
E10	9	1980.37	15979.2
E11	9	1895.61	14998.9
E12	9	1897.21	16278.4
F1	9
F2	9
F3	9
F4	9	2100.98	16421.9
F5	9	2222.29	17570.4
F6	9	1958.01	15090.6
F7	9	2145.09	15501.8
F8	9	2094.61	16373.3
F9	9	1921.45	15290.9
F10	9	2152.05	16350.3
F11	9	1859.52	14951.5
F12	9	1853.83	15042.8
G1	9
G2	9
G3	9
G4	9
G5	9
G6	9
G7	9
G8	9
G9	9
G10	9
G11	9
G12	9
H1	9
H2	9
H3	9
H4	9
H5	9
H6	9
H7	9
H8	9
H9	9
H10	9
H11	9
H12	9
A1	10	5126.48	2876.53
A2	10	2726.89	3404.34
A3	10	614.857	3801.85
A4	10	491.574	3916.98
A5	10	118.858	4192.42
A6	10	618.444	3169.85
A7	10	528.579	3896.83
A8	10	737.476	3626.22
A9	10	299.724	3395.36
A10	10	3720.85	2954.11
A11	10	3864.08	3058.72
A12	10	2803.69	3988.46
B1	10
B2	10
B3	10
B4	10	5305.16	3369.7
B5	10	5684.93	3433.29
B6	10	2247.85	3600.74
B7	10	2661.9	3828.36
B8	10	3928.58	3729.36
B9	10	5674.69	3138.66
B10	10	4807.26	3021.26
B11	10	4290.45	2755.46
B12	10	4284.15	2863.67
C1	10
C2	10
C3	10
C4	10	5509.8	2720.57
C5	10	5911.8	2870.7
C6	10	6183.84	2995.11
C7	10	5843.28	2887.05
C8	10	6366.06	3168.54
C9	10	6313.16	3100.35
C10	10	6338.19	3010.17
C11	10	5711.08	2725.66
C12	10	5672.34	2919.73
D1	10	1890.61	17431.8
D2	10	1221.65	12431.9
D3	10	1080.34	12257.1
D4	10	2356.21	17754.5
D5	10	1672.17	13627.6
D6	10	1139.16	11030.6
D7	10	1315.52	11614.9
D8	10	1393.85	13323.7
D9	10	1517.95	13406.2
D10	10	1610.49	13770.6
D11	10	1439.9	12998.8
D12	10	1322.89	12598.7
E1	10
E2	10
E3	10
E4	10	1901.07	15409.5
E5	10	2144.69	17182.1
E6	10	1833.51	15551.9
E7	10	2061.21	15405.8
E8	10	2109.24	17044.5
E9	10	1817.18	15099.6
E10	10	1996.31	16018.5
E11	10	1923.99	15085
E12	10	1895.12	16227.6
F1	10
F2	10
F3	10
F4	10	2162.41	16951.5
F5	10	2231.18	17552.6
F6	10	1974.71	15158.6
F7	10	2153.84	15567.2
F8	10	2107.53	16406
F9	10	1928.53	15325.4
F10	10	2167.86	16431.5
F11	10	1862.83	15007.1
F12	10	1855.54	14962
G1	10
G2	10
G3	10
G4	10
G5	10
G6	10
G7	10
G8	10
G9	10
G10	10
G11	10
G12	10
H1	10
H2	10
H3	10
H4	10
H5	10
H6	10
H7	10
H8	10
H9	10
H10	10
H11	10
H12	10
A1	11	5089.38	2833.74
A2	11	2726.16	3413.1
A3	11	619.988	3794.58
A4	11	499.208	3951.69
A5	11	126.423	4207.97
A6	11	625.328	3189.31
A7	11	531.944	3898.55
A8	11	745.505	3646.79
A9	11	310.241	3405.62
A10	11	3741.82	2968.24
A11	11	3836.86	3030.59
A12	11	2805.75	3984.15
B1	11
B2	11
B3	11
B4	11	5335.79	3403.29
B5	11	5736.13	3470.21
B6	11	2252.77	3604.44
B7	11	2664.69	3830.11
B8	11	3939.58	3727.36
B9	11	5690.67	3128.97
B10	11	4824.87	3010.58
B11	11	4323.21	2786.09
B12	11	4311.31	2867.17
C1	11
C2	11
C3	11
C4	11	5581.09	2742.94
C5	11	5903.02	2840.15
C6	11	6208.52	2993.12
C7	11	5894.56	2887.88
C8	11	6391.34	3169.91
C9	11	6357.65	3127.03
C10	11	6365.68	3021.72
C11	11	5703.04	2716.98
C12	11	5716.27	2929.69
D1	11	1888.04	17403.4
D2	11	1221.89	12459.2
D3	11	1079.79	12241.9
D4	11	2434	17808.4
D5	11	1731.43	13724.1
D6	11	1195.58	11063.3
D7	11	1351.71	11679.8
D8	11	1445.26	13427.6
D9	11	1564.75	13498
D10	11	1635.74	13779.3
D11	11	1456.69	12957.8
D12	11	1345.59	12711.3
E1	11
E2	11
E3	11
E4	11	1918.9	15388.6
E5	11	2162.82	17233.8
E6	11	1837.64	15496.4
E7	11	2092.42	15515.8
E8	11	2134.08	17106.9
E9	11	1837.73	15129.3
E10	11	1995.57	15969.6
E11	11	1939.49	15142.2
E12	11	1930.2	16354.9
F1	11
F2	11
F3	11
F4	11	2156.85	16873.4
F5	11	2251.86	17621.6
F6	11	1982.21	15162.8
F7	11	2160.05	15636.2
F8	11	2117.78	16477.2
F9	11	1935.38	15358.9
F10	11	2168.75	16382.2
F11	11	1889.23	15051.3
F12	11	1883.06	15057.6
G1	11
G2	11
G3	11
G4	11
G5	11
G6	11
G7	11
G8	11
G9	11
G10	11
G11	11
G12	11
H1	11
H2	11
H3	11
H4	11
H5	11
H6	11
H7	11
H8	11
H9	11
H10	11
H11	11
H12	11
A1	12	5090.45	2834.36
A2	12	2719.91	3398.69
A3	12	626.139	3825.56
A4	12	503.756	3933.44
A5	12	128.698	4204.8
A6	12	630.741	3209.61
A7	12	539.921	3914.73
A8	12	752.514	3636.95
A9	12	315.268	3390.17
A10	12	3785.88	2965.35
A11	12	3838.99	3035.64
A12	12	2795.39	3962.91
B1	12
B2	12
B3	12
B4	12	5351.89	3395.65
B5	12	5721.34	3447.82
B6	12	2266.59	3603.62
B7	12	2675.1	3834.31
B8	12	3952.53	3734.25
B9	12	5725.42	3162.66
B10	12	4826.88	3020.36
B11	12	4336.79	2771.27
B12	12	4333	2873.29
C1	12
C2	12
C3	12
C4	12	5548.96	2730.79
C5	12	5958.84	2868.72
C6	12	6234.31	3003.99
C7	12	5899.53	2885.88
C8	12	6425.1	3195.71
C9	12	6350.48	3116.81
C10	12	6361.63	3025.65
C11	12	5749.03	2725.45
C12	12	5739.19	2905.92
D1	12	1893.38	17373.4
D2	12	1236.85	12511.4
D3	12	1079.44	12205.6
D4	12	2526.58	17938.8
D5	12	1828.56	13898.3
D6	12	1268.19	11170.2
D7	12	1417.25	11809
D8	12	1492.34	13473.8
D9	12	1599.34	13501.9
D10	12	1662.89	13794.9
D11	12	1485.77	13069.7
D12	12	1365.16	12705.2
E1	12
E2	12
E3	12
E4	12	1943.15	15504.4
E5	12	2200.78	17269.2
E6	12	1878.82	15556.7
E7	12	2122.61	15581.6
E8	12	2160.05	17107
E9	12	1863.89	15195
E10	12	2029.64	16064.1
E11	12	1969.5	15165.8
E12	12	1932.26	16337.7
F1	12
F2	12
F3	12
F4	12	2180.63	17048.4
F5	12	2244.08	17554.3
F6	12	2000.22	15256.5
F7	12	2180.98	15701
F8	12	2119.03	16423.6
F9	12	1949.97	15418
F10	12	2200.02	16438.9
F11	12	1909.48	15116.2
F12	12	1898.27	15070.6
G1	12
G2	12
G3	12
G4	12
G5	12
G6	12
G7	12
G8	12
G9	12
G10	12
G11	12
G12	12
H1	12
H2	12
H3	12
H4	12
H5	12
H6	12
H7	12
H8	12
H9	12
H10	12
H11	12
H12	12
A1	13	5058.14	2794.83
A2	13	2730.81	3405.22
A3	13	630.672	3835.85
A4	13	519.579	4040.92
A5	13	132.189	4215.13
A6	13	633.106	3202.18
A7	13	547.802	3910.94
A8	13	757.106	3651.34
A9	13	312.832	3392.57
A10	13	3794.55	2975.33
A11	13	3845.22	3024.95
A12	13	2789.25	3960.23
B1	13
B2	13
B3	13
B4	13	5375.85	3426.5
B5	13	5777.51	3466.87
B6	13	2273.87	3593.89
B7	13	2685.16	3830.76
B8	13	3968.91	3727.01
B9	13	5791.08	3191.93
B10	13	4847.48	3033.95
B11	13	4357.22	2786.13
B12	13	4346.09	2866.41
C1	13
C2	13
C3	13
C4	13	5702.92	2782.99
C5	13	5910.99	2828.38
C6	13	6249.75	3010.26
C7	13	5908.39	2870.73
C8	13	6454.46	3191.59
C9	13	6388.67	3152.04
C10	13	6378.23	3018.73
C11	13	5780.41	2739.19
C12	13	5755.14	2935.26
D1	13	1908.39	17500.1
D2	13	1241.83	12560.1
D3	13	1082.64	12191.6
D4	13	2649.93	17960.7
D5	13	1925.25	14131.1
D6	13	1342.25	11231.6
D7	13	1479.2	11923.2
D8	13	1553.78	13544.6
D9	13	1669.04	13580.1
D10	13	1688.4	13820.6
D11	13	1540.07	13155.2
D12	13	1397.23	12753.3
E1	13
E2	13
E3	13
E4	13	1955.07	15185.8
E5	13	2261.41	17488.4
E6	13	1922.53	15635.7
E7	13	2176.94	15713.4
E8	13	2205.01	17184.7
E9	13	1903.03	15207.2
E10	13	2050.57	16085
E11	13	2008.48	15237.9
E12	13	1961.25	16386.4
F1	13
F2	13
F3	13
F4	13	2136.04	16626.3
F5	13	2268.96	17751.3
F6	13	1986.34	15218.2
F7	13	2190.77	15785.4
F8	13	2131.26	16485.9
F9	13	1957.6	15451.2
F10	13	2210.67	16430.5
F11	13	1937.69	15172.8
F12	13	1911.32	15104.6
G1	13
G2	13
G3	13
G4	13
G5	13
G6	13
G7	13
G8	13
G9	13
G10	13
G11	13
G12	13
H1	13
H2	13
H3	13
H4	13
H5	13
H6	13
H7	13
H8	13
H9	13
H10	13
H11	13
H12	13
A1	14	5036.44	2805.02
A2	14	2737.31	3395.8
A3	14	638.383	3852.46
A4	14	522.168	4031.54
A5	14	129.853	4216.55
A6	14	647.546	3220.99
A7	14	542.529	3906.3
A8	14	758.139	3635.29
A9	14	320.046	3425.16
A10	14	3766.11	2953.68
A11	14	3846.17	3030.35
A12	14	2784.71	3941.01
B1	14
B2	14
B3	14
B4	14	5398.41	3449.6
B5	14	5801.64	3488.53
B6	14	2281.39	3606.59
B7	14	2698.38	3864.15
B8	14	3986.07	3737.81
B9	14	5740.79	3126.79
B10	14	4887.36	3019.45
B11	14	4385.08	2793.54
B12	14	4360.21	2874.15
C1	14
C2	14
C3	14
C4	14	5720.58	2787.06
C5	14	5979.1	2861.73
C6	14	6280.52	3004.72
C7	14	5904.85	2845.05
C8	14	6466.35	3191.85
C9	14	6394.62	3136.06
C10	14	6441.04	3031.19
C11	14	5798.2	2752
C12	14	5775.31	2934.93
D1	14	1911.24	17543.6
D2	14	1248.3	12571.6
D3	14	1101.66	12313.2
D4	14	2776.23	18116.1
D5	14	2012.21	14086
D6	14	1435.71	11346.1
D7	14	1551.56	11842.5
D8	14	1638.42	13655.3
D9	14	1769.52	13807.6
D10	14	1770.47	13939
D11	14	1590.65	13177.2
D12	14	1436.46	12810.3
E1	14
E2	14
E3	14
E4	14	2028.51	15369
E5	14	2320.6	17548.9
E6	14	1998.34	15735.2
E7	14	2239.73	15811.8
E8	14	2273.24	17261.1
E9	14	1944.28	15214.9
E10	14	2094.62	16155.9
E11	14	2065.73	15354.6
E12	14	2011.7	16471.7
F1	14
F2	14
F3	14
F4	14	2148.41	16683.3
F5	14	2271.59	17757.9
F6	14	2005.54	15252
F7	14	2206.62	15811
F8	14	2139.17	16557.8
F9	14	1974.15	15468.6
F10	14	2260.66	16536.7
F11	14	1980.91	15288.4
F12	14	1955.72	15239.4
G1	14
G2	14
G3	14
G4	14
G5	14
G6	14
G7	14
G8	14
G9	14
G10	14
G11	14
G12	14
H1	14
H2	14
H3	14
H4	14
H5	14
H6	14
H7	14
H8	14
H9	14
H10	14
H11	14
H12	14
A1	15	5036.61	2797.02
A2	15	2754.37	3404.32
A3	15	644.925	3865.79
A4	15	514.166	3958.14
A5	15	137.996	4200.18
A6	15	650.021	3213.57
A7	15	546.994	3923.7
A8	15	759.857	3638.16
A9	15	319.512	3406.8
A10	15	3784.47	2969.28
A11	15	3864.19	3025.96
A12	15	2781.87	3939.4
B1	15
B2	15
B3	15
B4	15	5410.52	3401.69
B5	15	5800.53	3478.09
B6	15	2294.42	3618.19
B7	15	2709.33	3867.82
B8	15	4005.74	3767.06
B9	15	5807.75	3168.1
B10	15	4897.61	3046.41
B11	15	4378.52	2774.06
B12	15	4383.46	2873.61
C1	15
C2	15
C3	15
C4	15	5639.77	2743.36
C5	15	6056.78	2886.98
C6	15	6301.89	3014.51
C7	15	5955.1	2874.38
C8	15	6508.79	3202.99
C9	15	6423.43	3153.89
C10	15	6466.62	3040.15
C11	15	5833.33	2751.77
C12	15	5801.73	2949.4
D1	15	1929.23	17566.2
D2	15	1243.72	12528.1
D3	15	1107.25	12329.5
D4	15	2895.34	18337.1
D5	15	2136.04	14259
D6	15	1539.72	11462.8
D7	15	1637.87	11945.2
D8	15	1735.22	13789.6
D9	15	1855.32	13808.4
D10	15	1842.77	14050.5
D11	15	1680.84	13343.2
D12	15	1496.73	12937.3
E1	15
E2	15
E3	15
E4	15	2094.8	15610.6
E5	15	2411.88	17658.3
E6	15	2071.16	15773.6
E7	15	2316.35	15903.2
E8	15	2360.34	17358.4
E9	15	2037.12	15324.5
E10	15	2171.59	16293.4
E11	15	2143.17	15441.5
E12	15	2074.22	16577.8
F1	15
F2	15
F3	15
F4	15	2200.08	17029.9
F5	15	2287.26	17730.2
F6	15	2022.77	15346.8
F7	15	2216.77	15827.9
F8	15	2155.36	16551.2
F9	15	1971.51	15448.6
F10	15	2314.58	16628.6
F11	15	2039.89	15372.8
F12	15	2007.8	15309.7
G1	15
G2	15
G3	15
G4	15
G5	15
G6	15
G7	15
G8	15
G9	15
G10	15
G11	15
G12	15
H1	15
H2	15
H3	15
H4	15
H5	15
H6	15
H7	15
H8	15
H9	15
H10	15
H11	15
H12	15
A1	16	5005.97	2777.93
A2	16	2752.41	3417.74
A3	16	642.201	3858.61
A4	16	524.044	3957.45
A5	16	143.861	4224.3
A6	16	661.702	3236.66
A7	16	553.688	3929.02
A8	16	762.648	3644.81
A9	16	321.033	3419.59
A10	16	3806.39	2953.88
A11	16	3870.97	3028.28
A12	16	2775.66	3923.09
B1	16
B2	16
B3	16
B4	16	5424.42	3405.6
B5	16	5832.17	3495.06
B6	16	2300.97	3628.85
B7	16	2718.33	3888.36
B8	16	4023.31	3765.08
B9	16	5808.21	3158.55
B10	16	4913.48	3042.03
B11	16	4386.22	2774.81
B12	16	4398.26	2883.85
C1	16
C2	16
C3	16
C4	16	5661.42	2743.79
C5	16	6061.41	2888.97
C6	16	6336.33	3041.73
C7	16	5949.15	2880.37
C8	16	6532.6	3210.05
C9	16	6449.53	3155.91
C10	16	6487.56	3033.36
C11	16	5858.67	2753.2
C12	16	5814.84	2952.66
D1	16	1928.39	17627.1
D2	16	1254.61	12664
D3	16	1121.74	12409.9
D4	16	3035.44	18566.8
D5	16	2267.2	14453.7
D6	16	1636.02	11518
D7	16	1730.61	12076.7
D8	16	1835.86	13923.5
D9	16	1955.01	13895.9
D10	16	1934.32	14148.3
D11	16	1772.61	13430.1
D12	16	1559.19	12964.6
E1	16
E2	16
E3	16
E4	16	2182.87	15698.9
E5	16	2512.8	17757.1
E6	16	2194.35	15937.4
E7	16	2414.81	15997.4
E8	16	2461.83	17486.4
E9	16	2124.5	15399.3
E10	16	2247	16379.7
E11	16	2225.4	15509.7
E12	16	2137.03	16624.5
F1	16
F2	16
F3	16
F4	16	2222.15	17083.5
F5	16	2304.44	17738.4
F6	16	2041.1	15353
F7	16	2236.23	15897.2
F8	16	2171.89	16607.8
F9	16	1996.79	15492.5
F10	16	2400.35	16725.1
F11	16	2123.62	15466.1
F12	16	2069.19	15349.8
G1	16
G2	16
G3	16
G4	16
G5	16
G6	16
G7	16
G8	16
G9	16
G10	16
G11	16
G12	16
H1	16
H2	16
H3	16
H4	16
H5	16
H6	16
H7	16
H8	16
H9	16
H10	16
H11	16
H12	16
A1	17	4983.26	2748.58
A2	17	2762.12	3413.8
A3	17	646.054	3859.11
A4	17	534.432	3993.03
A5	17	144.061	4240.9
A6	17	658.557	3223.45
A7	17	557.653	3920.54
A8	17	768.444	3666.69
A9	17	330.873	3413.36
A10	17	3820.1	2984.91
A11	17	3892.61	3036.53
A12	17	2778.51	3917.54
B1	17
B2	17
B3	17
B4	17	5446.39	3412.85
B5	17	5854.31	3510.47
B6	17	2315.42	3633.52
B7	17	2744.74	3900.28
B8	17	4027.15	3754.13
B9	17	5838.2	3173.22
B10	17	4930.54	3037.23
B11	17	4399.95	2777.17
B12	17	4415.43	2887.96
C1	17
C2	17
C3	17
C4	17	5713.65	2768.26
C5	17	6046.71	2875.2
C6	17	6362.04	3046.07
C7	17	6002.74	2906.61
C8	17	6555.93	3192.74
C9	17	6479.38	3172.63
C10	17	6504.53	3031.37
C11	17	5910.07	2779.8
C12	17	5840.4	2956.07
D1	17	1948.12	17714.5
D2	17	1264.19	12676.4
D3	17	1115.33	12404
D4	17	3185.27	18669.2
D5	17	2414.97	14686.3
D6	17	1730.64	11616.9
D7	17	1827.05	12145.2
D8	17	1935.86	14013.7
D9	17	2065.11	14025.8
D10	17	2039.89	14233.1
D11	17	1878.91	13607.8
D12	17	1655.17	13077.1
E1	17
E2	17
E3	17
E4	17	2285.33	15745
E5	17	2633.94	17863
E6	17	2310.82	16056.5
E7	17	2532.7	16182.7
E8	17	2565.03	17608
E9	17	2232.84	15579.3
E10	17	2329.28	16425.9
E11	17	2342.52	15703
E12	17	2236.95	16755.2
F1	17
F2	17
F3	17
F4	17	2225.64	16994.2
F5	17	2342.38	17829
F6	17	2062.35	15406.4
F7	17	2252.63	15869.8
F8	17	2192.64	16605.2
F9	17	2028.51	15555.7
F10	17	2494.11	16820.9
F11	17	2229.4	15623.5
F12	17	2161.83	15505.1
G1	17
G2	17
G3	17
G4	17
G5	17
G6	17
G7	17
G8	17
G9	17
G10	17
G11	17
G12	17
H1	17
H2	17
H3	17
H4	17
H5	17
H6	17
H7	17
H8	17
H9	17
H10	17
H11	17
H12	17
A1	18	4969.45	2743.71
A2	18	2781.69	3414.32
A3	18	660.327	3884.18
A4	18	533.925	3955
A5	18	150.13	4246.85
A6	18	669.582	3246.77
A7	18	558.959	3924.97
A8	18	783.03	3653.44
A9	18	338.93	3416.76
A10	18	3842.83	2973.65
A11	18	3891.54	3015.99
A12	18	2768.63	3901.17
B1	18
B2	18
B3	18
B4	18	5469.93	3411.54
B5	18	5876.68	3495.42
B6	18	2332.01	3649.88
B7	18	2751.51	3914.96
B8	18	4077.7	3790.7
B9	18	5864.27	3181.2
B10	18	4969.18	3047.4
B11	18	4456.16	2818.76
B12	18	4429.73	2901.66
C1	18
C2	18
C3	18
C4	18	5680.13	2745.3
C5	18	6101.49	2901.45
C6	18	6390.75	3022.69
C7	18	5993.13	2871.88
C8	18	6601.91	3227
C9	18	6526.33	3175.72
C10	18	6526.67	3042.38
C11	18	5897.49	2752.06
C12	18	5869.35	2967.11
D1	18	1955.42	17759.1
D2	18	1270.91	12691
D3	18	1123.62	12437.3
D4	18	3338.17	18872.6
D5	18	2535.42	14804.8
D6	18	1847.98	11753
D7	18	1958.08	12370.6
D8	18	2072.8	14244.3
D9	18	2183.03	14144.1
D10	18	2160.18	14392.1
D11	18	1975.51	13619
D12	18	1749.51	13150.3
E1	18
E2	18
E3	18
E4	18	2406.94	15965.4
E5	18	2775.49	18104
E6	18	2456.56	16248.8
E7	18	2669.14	16356.5
E8	18	2714.55	17792
E9	18	2359.05	15745
E10	18	2454.28	16599.2
E11	18	2445.9	15767.1
E12	18	2336.86	16855.5
F1	18
F2	18
F3	18
F4	18	2289.54	17232.7
F5	18	2393.38	17964.8
F6	18	2098.38	15400.8
F7	18	2291.75	15960.7
F8	18	2253.52	16766.8
F9	18	2070.37	15633.5
F10	18	2623.68	16964.7
F11	18	2336.72	15706.5
F12	18	2252.14	15586
G1	18
G2	18
G3	18
G4	18
G5	18
G6	18
G7	18
G8	18
G9	18
G10	18
G11	18
G12	18
H1	18
H2	18
H3	18
H4	18
H5	18
H6	18
H7	18
H8	18
H9	18
H10	18
H11	18
H12	18
A1	19	4973.3	2729.96
A2	19	2794.84	3431.19
A3	19	664.331	3883.57
A4	19	548.28	3958.88
A5	19	159.928	4245.27
A6	19	682.37	3240.46
A7	19	575.798	3935.07
A8	19	793.118	3672.09
A9	19	348.056	3428.92
A10	19	3866.26	2991.23
A11	19	3915.77	3026.13
A12	19	2776.17	3900.25
B1	19
B2	19
B3	19
B4	19	5489.33	3414.03
B5	19	5866.7	3472.88
B6	19	2357.28	3645.22
B7	19	2780.32	3918.02
B8	19	4100.66	3791.54
B9	19	5878.38	3173.94
B10	19	4986.34	3052.17
B11	19	4441.63	2785.55
B12	19	4448.53	2895.64
C1	19
C2	19
C3	19
C4	19	5707.15	2742.26
C5	19	6173.59	2942.36
C6	19	6421.45	3061.4
C7	19	6030.22	2879.39
C8	19	6634.49	3242.84
C9	19	6545.17	3167.24
C10	19	6562.61	3055.56
C11	19	5921.44	2753.01
C12	19	5875.73	2966.04
D1	19	1948.04	17693.1
D2	19	1282.43	12731.2
D3	19	1137.16	12494.5
D4	19	3489.77	19013.7
D5	19	2683.54	14955.3
D6	19	1952.93	11891.5
D7	19	2068.49	12467.5
D8	19	2179.88	14341.9
D9	19	2332.72	14378.7
D10	19	2279.27	14493.7
D11	19	2094.54	13744.2
D12	19	1843.94	13233.4
E1	19
E2	19
E3	19
E4	19	2536.13	16096.7
E5	19	2898.72	18019.4
E6	19	2584.17	16347.7
E7	19	2798.48	16472.3
E8	19	2857.61	17956.7
E9	19	2492.68	15917.3
E10	19	2579.44	16726.2
E11	19	2577.43	15923.8
E12	19	2445.92	16929.5
F1	19
F2	19
F3	19
F4	19	2324.24	17285.6
F5	19	2438.19	17913.3
F6	19	2144.25	15445
F7	19	2345.57	16025.1
F8	19	2312.94	16838.5
F9	19	2128.25	15708.7
F10	19	2754.12	17081.7
F11	19	2468.1	15848.4
F12	19	2363.36	15674.8
G1	19
G2	19
G3	19
G4	19
G5	19
G6	19
G7	19
G8	19
G9	19
G10	19
G11	19
G12	19
H1	19
H2	19
H3	19
H4	19
H5	19
H6	19
H7	19
H8	19
H9	19
H10	19
H11	19
H12	19
A1	20	4931.21	2719.9
A2	20	2804.43	3443.37
A3	20	659.16	3881.97
A4	20	579.552	3997.8
A5	20	175.806	4249.77
A6	20	702.216	3239.55
A7	20	597.296	3940.58
A8	20	821.898	3694.57
A9	20	357.836	3465.6
A10	20	3901.16	2994.72
A11	20	3931.52	3024.52
A12	20	2776.36	3904.7
B1	20
B2	20
B3	20
B4	20	5537.84	3426.07
B5	20	5922.59	3481.03
B6	20	2386.44	3663.64
B7	20	2809.62	3910.1
B8	20	4099.36	3781.83
B9	20	5913.72	3158.68
B10	20	5003.52	3064.54
B11	20	4486.06	2817.24
B12	20	4470.1	2916.34
C1	20
C2	20
C3	20
C4	20	5761.47	2773.19
C5	20	6183.71	2928.77
C6	20	6451.39	3051.99
C7	20	6066.01	2914.32
C8	20	6650.02	3224.02
C9	20	6594.33	3186.62
C10	20	6570.75	3040.53
C11	20	5923.73	2744.82
C12	20	5896.99	2966.58
D1	20	1964.93	17857.5
D2	20	1279.04	12735.3
D3	20	1122.19	12414.9
D4	20	3648.4	19136.9
D5	20	2841.57	15207.2
D6	20	2053.72	11980.1
D7	20	2182.92	12643
D8	20	2298.16	14423
D9	20	2481.69	14605.6
D10	20	2411.68	14643.9
D11	20	2211.05	13860.8
D12	20	1959.07	13360.9
E1	20
E2	20
E3	20
E4	20	2661.18	16106.2
E5	20	3080.23	18331.2
E6	20	2737.2	16523.4
E7	20	2946.48	16689
E8	20	2984.68	18059.5
E9	20	2641.93	16112.5
E10	20	2720.07	16899.1
E11	20	2710.4	16046.7
E12	20	2591.29	17101.9
F1	20
F2	20
F3	20
F4	20	2383.18	17243.6
F5	20	2535.39	18107.4
F6	20	2231.66	15577.8
F7	20	2418.97	16087.9
F8	20	2390.71	16882.8
F9	20	2215.76	15860.7
F10	20	2903.83	17247.2
F11	20	2610.93	15966.6
F12	20	2494.18	15820.3
G1	20
G2	20
G3	20
G4	20
G5	20
G6	20
G7	20
G8	20
G9	20
G10	20
G11	20
G12	20
H1	20
H2	20
H3	20
H4	20
H5	20
H6	20
H7	20
H8	20
H9	20
H10	20
H11	20
H12	20
A1	21	4929.25	2728.32
A2	21	2812.71	3441.52
A3	21	661.307	3894.41
A4	21	627.868	4008.63
A5	21	207.227	4253.69
A6	21	736.575	3256.72
A7	21	634.681	3948.89
A8	21	854.647	3683.04
A9	21	380.777	3448.12
A10	21	3948.42	3026.07
A11	21	3962.89	3028.18
A12	21	2789.47	3911.62
B1	21
B2	21
B3	21
B4	21	5613.82	3450.9
B5	21	5968.58	3488.83
B6	21	2437.75	3668.56
B7	21	2872.3	3910.76
B8	21	4173.2	3773.74
B9	21	5958.75	3207.25
B10	21	5030.33	3057.52
B11	21	4508.39	2816.06
B12	21	4503.79	2909.58
C1	21
C2	21
C3	21
C4	21	5822.47	2778.3
C5	21	6211.94	2928
C6	21	6483.17	3056.14
C7	21	6066.6	2878.66
C8	21	6685.95	3241.94
C9	21	6610.96	3186.46
C10	21	6597.57	3030.73
C11	21	5960.52	2761.82
C12	21	5928.47	2975.44
D1	21	1984.25	17933.6
D2	21	1290.67	12790.8
D3	21	1128.08	12448.5
D4	21	3803.84	19246.3
D5	21	2988.98	15377.9
D6	21	2155.59	12112.9
D7	21	2314.48	12788.3
D8	21	2420.72	14573.3
D9	21	2579.42	14626.2
D10	21	2525.6	14752.9
D11	21	2334.53	13950
D12	21	2079.46	13512.8
E1	21
E2	21
E3	21
E4	21	2798	16220.5
E5	21	3245.42	18509
E6	21	2882.55	16683.9
E7	21	3090.34	16767.2
E8	21	3138.33	18243.1
E9	21	2782.64	16285.3
E10	21	2861.41	17084.8
E11	21	2845.53	16169.8
E12	21	2728.25	17249.9
F1	21
F2	21
F3	21
F4	21	2444.77	17232.7
F5	21	2644.4	18253
F6	21	2316.27	15641.9
F7	21	2530.76	16266.4
F8	21	2500.61	17072.9
F9	21	2313.2	15955
F10	21	3052.81	17400.5
F11	21	2752.28	16094.4
F12	21	2633.55	15975.9
G1	21
[truncated: 1,847 more rows]

## Sheet: Amplification Data
Block Type	96well
Chemistry	TAQMAN
Experiment File Name	C:\Users\11193327\Downloads\SK10042014 (2).eds
Experiment Run End Time	Not Started
Instrument Type	steponeplus
Passive Reference	ROX
Well	Cycle	Target Name	Rn	ΔRn
A4	1	P53	0.105573	0
A4	2	P53	0.114797	0.00922402
A4	3	P53	0.11864	0.0130666
A4	4	P53	0.122093	0.0165194
A4	5	P53	0.123785	0.0182112
A4	6	P53	0.123863	0.0182893
A4	7	P53	0.124143	0.0185692
A4	8	P53	0.124491	0.0189171
A4	9	P53	0.125562	0.0199885
A4	10	P53	0.125498	0.0199247
A4	11	P53	0.126328	0.0207543
A4	12	P53	0.12807	0.0224968
A4	13	P53	0.128579	0.0230059
A4	14	P53	0.129521	0.0239474
A4	15	P53	0.129901	0.0243273
A4	16	P53	0.132419	0.026846
A4	17	P53	0.133841	0.0282678
A4	18	P53	0.135	0.0294268
A4	19	P53	0.138494	0.0329204
A4	20	P53	0.144968	0.0393942
A4	21	P53	0.156629	0.0510555
A4	22	P53	0.174756	0.0691821
A4	23	P53	0.211363	0.10579
A4	24	P53	0.269741	0.164167
A4	25	P53	0.356746	0.251172
A4	26	P53	0.472374	0.366801
A4	27	P53	0.595385	0.489811
A4	28	P53	0.72243	0.616857
A4	29	P53	0.844058	0.738485
A4	30	P53	0.950792	0.845219
A4	31	P53	1.01565	0.910076
A4	32	P53	1.0847	0.979126
A4	33	P53	1.1384	1.03282
A4	34	P53	1.16639	1.06081
A4	35	P53	1.2005	1.09492
A4	36	P53	1.21071	1.10513
A4	37	P53	1.20317	1.09759
A4	38	P53	1.23209	1.12652
A4	39	P53	1.24006	1.13449
A4	40	P53	1.24029	1.13472
A5	1	P53	0.00963687	0
A5	2	P53	0.0180508	0.00841395
A5	3	P53	0.0200913	0.0104544
A5	4	P53	0.0225286	0.0128918
A5	5	P53	0.0241004	0.0144636
A5	6	P53	0.0256202	0.0159833
A5	7	P53	0.0257886	0.0161517
A5	8	P53	0.0281059	0.0184691
A5	9	P53	0.0263845	0.0167476
A5	10	P53	0.0283507	0.0187138
A5	11	P53	0.0300438	0.020407
A5	12	P53	0.0306074	0.0209705
A5	13	P53	0.0313605	0.0217237
A5	14	P53	0.030796	0.0211591
A5	15	P53	0.0328547	0.0232178
A5	16	P53	0.0340555	0.0244186
A5	17	P53	0.0339695	0.0243327
A5	18	P53	0.0353509	0.025714
A5	19	P53	0.037672	0.0280351
A5	20	P53	0.0413683	0.0317314
A5	21	P53	0.0487171	0.0390802
A5	22	P53	0.0596976	0.0500607
A5	23	P53	0.0802869	0.07065
A5	24	P53	0.112622	0.102985
A5	25	P53	0.161946	0.15231
A5	26	P53	0.221527	0.21189
A5	27	P53	0.286065	0.276428
A5	28	P53	0.345854	0.336217
A5	29	P53	0.39476	0.385124
A5	30	P53	0.433341	0.423704
A5	31	P53	0.457923	0.448286
A5	32	P53	0.474799	0.465162
A5	33	P53	0.488012	0.478376
A5	34	P53	0.497913	0.488276
A5	35	P53	0.506475	0.496838
A5	36	P53	0.509023	0.499386
A5	37	P53	0.513454	0.503817
A5	38	P53	0.512837	0.5032
A5	39	P53	0.515131	0.505495
A5	40	P53	0.516977	0.50734
A6	1	P53	0.174783	0
A6	2	P53	0.181731	0.00694789
A6	3	P53	0.187944	0.0131616
A6	4	P53	0.18964	0.0148577
A6	5	P53	0.191311	0.016528
A6	6	P53	0.19055	0.0157671
A6	7	P53	0.194609	0.0198264
A6	8	P53	0.19565	0.0208678
A6	9	P53	0.194153	0.0193708
A6	10	P53	0.195102	0.0203192
A6	11	P53	0.19607	0.0212872
A6	12	P53	0.196517	0.021734
A6	13	P53	0.197711	0.0229281
A6	14	P53	0.201039	0.0262568
A6	15	P53	0.202274	0.0274913
A6	16	P53	0.20444	0.0296572
A6	17	P53	0.204302	0.0295192
A6	18	P53	0.20623	0.0314473
A6	19	P53	0.210578	0.0357955
A6	20	P53	0.216763	0.0419805
A6	21	P53	0.226171	0.0513885
A6	22	P53	0.244108	0.0693252
A6	23	P53	0.278457	0.103675
A6	24	P53	0.33593	0.161148
A6	25	P53	0.428247	0.253464
A6	26	P53	0.564543	0.38976
A6	27	P53	0.720485	0.545703
A6	28	P53	0.904444	0.729662
A6	29	P53	1.08308	0.908299
A6	30	P53	1.25066	1.07588
A6	31	P53	1.39346	1.21868
A6	32	P53	1.51412	1.33934
A6	33	P53	1.61338	1.4386
A6	34	P53	1.69654	1.52176
A6	35	P53	1.74883	1.57405
A6	36	P53	1.78934	1.61455
A6	37	P53	1.81898	1.6442
A6	38	P53	1.83126	1.65648
A6	39	P53	1.85411	1.67933
A6	40	P53	1.86735	1.69256
A7	1	P53	0.113024	0
A7	2	P53	0.121301	0.00827719
A7	3	P53	0.126937	0.0139128
A7	4	P53	0.130507	0.0174832
A7	5	P53	0.13128	0.0182564
A7	6	P53	0.131213	0.018189
A7	7	P53	0.128886	0.0158621
A7	8	P53	0.133319	0.0202954
A7	9	P53	0.135005	0.021981
A7	10	P53	0.135643	0.0226191
A7	11	P53	0.136447	0.0234226
A7	12	P53	0.13792	0.0248962
A7	13	P53	0.140069	0.0270451
A7	14	P53	0.138886	0.0258616
A7	15	P53	0.139408	0.0263838
A7	16	P53	0.140922	0.0278985
A7	17	P53	0.142239	0.0292148
A7	18	P53	0.142411	0.0293869
A7	19	P53	0.146325	0.0333008
A7	20	P53	0.151575	0.0385514
A7	21	P53	0.160724	0.0476997
A7	22	P53	0.175285	0.0622614
A7	23	P53	0.205134	0.09211
A7	24	P53	0.252803	0.139779
A7	25	P53	0.332637	0.219613
A7	26	P53	0.436486	0.323462
A7	27	P53	0.562045	0.449021
A7	28	P53	0.697636	0.584612
A7	29	P53	0.819516	0.706492
A7	30	P53	0.937105	0.824081
A7	31	P53	1.02491	0.911886
A7	32	P53	1.0951	0.98208
A7	33	P53	1.14728	1.03426
A7	34	P53	1.1828	1.06977
A7	35	P53	1.20895	1.09592
A7	36	P53	1.22328	1.11026
A7	37	P53	1.24057	1.12755
A7	38	P53	1.24635	1.13333
A7	39	P53	1.25773	1.14471
A7	40	P53	1.26785	1.15482
A8	1	P53	0.185554	0
A8	2	P53	0.19154	0.00598615
A8	3	P53	0.195686	0.0101313
A8	4	P53	0.199255	0.0137008
A8	5	P53	0.201454	0.0158993
A8	6	P53	0.201386	0.015832
A8	7	P53	0.200109	0.0145544
A8	8	P53	0.201856	0.0163013
A8	9	P53	0.201636	0.0160819
A8	10	P53	0.203373	0.0178191
A8	11	P53	0.204427	0.0188731
A8	12	P53	0.206908	0.0213539
A8	13	P53	0.20735	0.0217959
A8	14	P53	0.20855	0.0229954
A8	15	P53	0.208858	0.0233032
A8	16	P53	0.209242	0.0236879
A8	17	P53	0.209574	0.0240201
A8	18	P53	0.214327	0.0287728
A8	19	P53	0.215986	0.0304313
A8	20	P53	0.222461	0.0369066
A8	21	P53	0.232049	0.0464949
A8	22	P53	0.246386	0.0608317
A8	23	P53	0.274423	0.0888688
A8	24	P53	0.327978	0.142424
A8	25	P53	0.410262	0.224708
A8	26	P53	0.529405	0.343851
A8	27	P53	0.677902	0.492347
A8	28	P53	0.843481	0.657926
A8	29	P53	1.01193	0.826379
A8	30	P53	1.17529	0.989737
A8	31	P53	1.31363	1.12808
A8	32	P53	1.4369	1.25135
A8	33	P53	1.54378	1.35823
A8	34	P53	1.62185	1.4363
A8	35	P53	1.68657	1.50102
A8	36	P53	1.72322	1.53767
A8	37	P53	1.74985	1.56429
A8	38	P53	1.77844	1.59288
A8	39	P53	1.79751	1.61196
A8	40	P53	1.79987	1.61432
A9	1	P53	0.0687642	0
A9	2	P53	0.0787397	0.00997555
A9	3	P53	0.0831297	0.0143656
A9	4	P53	0.0836682	0.014904
A9	5	P53	0.0881612	0.019397
A9	6	P53	0.0862507	0.0174866
A9	7	P53	0.0867565	0.0179923
A9	8	P53	0.0901342	0.0213701
A9	9	P53	0.0879051	0.0191409
A9	10	P53	0.0882745	0.0195104
A9	11	P53	0.0910968	0.0223327
A9	12	P53	0.0929945	0.0242304
A9	13	P53	0.0922109	0.0234468
A9	14	P53	0.0934398	0.0246756
A9	15	P53	0.0937865	0.0250224
A9	16	P53	0.0938805	0.0251163
A9	17	P53	0.0969347	0.0281706
A9	18	P53	0.0991966	0.0304324
A9	19	P53	0.101506	0.032742
A9	20	P53	0.103254	0.0344897
A9	21	P53	0.11043	0.0416661
A9	22	P53	0.123658	0.0548934
A9	23	P53	0.146197	0.0774332
A9	24	P53	0.185422	0.116658
A9	25	P53	0.250255	0.181491
A9	26	P53	0.349028	0.280263
A9	27	P53	0.468259	0.399495
A9	28	P53	0.598224	0.52946
A9	29	P53	0.726931	0.658167
A9	30	P53	0.833796	0.765031
A9	31	P53	0.91738	0.848616
A9	32	P53	0.979079	0.910315
A9	33	P53	1.02796	0.959193
A9	34	P53	1.06554	0.996776
A9	35	P53	1.07864	1.00987
A9	36	P53	1.10082	1.03205
A9	37	P53	1.10679	1.03803
A9	38	P53	1.11702	1.04825
A9	39	P53	1.11707	1.04831
A9	40	P53	1.12849	1.05973
A10	1	P53	1.22938	0
A10	2	P53	1.23727	0.00789165
A10	3	P53	1.24464	0.0152586
A10	4	P53	1.24859	0.0192087
A10	5	P53	1.24779	0.0184094
A10	6	P53	1.2485	0.0191214
A10	7	P53	1.2539	0.0245246
A10	8	P53	1.25276	0.0233791
A10	9	P53	1.25337	0.0239885
A10	10	P53	1.25955	0.0301731
A10	11	P53	1.26062	0.0312394
A10	12	P53	1.2767	0.0473264
A10	13	P53	1.27534	0.0459605
A10	14	P53	1.27506	0.0456812
A10	15	P53	1.27454	0.0451603
A10	16	P53	1.28861	0.0592287
A10	17	P53	1.2798	0.0504243
A10	18	P53	1.29229	0.0629159
A10	19	P53	1.29253	0.0631557
A10	20	P53	1.30268	0.0733039
A10	21	P53	1.3048	0.0754223
A10	22	P53	1.33173	0.102355
A10	23	P53	1.36483	0.13545
A10	24	P53	1.42357	0.194194
A10	25	P53	1.51975	0.290371
A10	26	P53	1.68632	0.456945
A10	27	P53	1.93153	0.702152
A10	28	P53	2.23282	1.00344
A10	29	P53	2.54521	1.31583
A10	30	P53	2.87031	1.64093
A10	31	P53	3.20643	1.97706
A10	32	P53	3.51926	2.28988
A10	33	P53	3.82337	2.59399
A10	34	P53	4.11702	2.88765
A10	35	P53	4.38308	3.1537
A10	36	P53	4.64134	3.41196
A10	37	P53	4.87985	3.65047
A10	38	P53	5.10802	3.87864
A10	39	P53	5.30827	4.07889
A10	40	P53	5.50826	4.27888
A11	1	P53	1.2313	0
A11	2	P53	1.24485	0.0135524
A11	3	P53	1.24588	0.0145844
A11	4	P53	1.25157	0.0202678
A11	5	P53	1.25587	0.0245746
A11	6	P53	1.25755	0.0262487
A11	7	P53	1.26295	0.0316511
A11	8	P53	1.26298	0.0316793
A11	9	P53	1.27001	0.0387084
A11	10	P53	1.2633	0.0320008
A11	11	P53	1.26604	0.0347432
A11	12	P53	1.26464	0.0333408
A11	13	P53	1.27117	0.0398672
A11	14	P53	1.26922	0.0379156
A11	15	P53	1.27701	0.0457104
A11	16	P53	1.27827	0.0469714
A11	17	P53	1.28192	0.0506247
A11	18	P53	1.2903	0.0590026
A11	19	P53	1.29399	0.062688
A11	20	P53	1.29988	0.0685821
A11	21	P53	1.30867	0.0773693
A11	22	P53	1.31544	0.0841379
A11	23	P53	1.34421	0.112912
A11	24	P53	1.39714	0.165839
A11	25	P53	1.47857	0.247273
A11	26	P53	1.62176	0.390464
A11	27	P53	1.84496	0.613658
A11	28	P53	2.12481	0.893508
A11	29	P53	2.44298	1.21168
A11	30	P53	2.75157	1.52027
A11	31	P53	3.08823	1.85693
A11	32	P53	3.41965	2.18835
A11	33	P53	3.73073	2.49943
A11	34	P53	4.03202	2.80072
A11	35	P53	4.31625	3.08495
A11	36	P53	4.56901	3.33771
A11	37	P53	4.79544	3.56414
A11	38	P53	5.05133	3.82003
A11	39	P53	5.26677	4.03547
A11	40	P53	5.46679	4.23549
A12	1	P53	0.684263	0
A12	2	P53	0.688167	0.00390428
A12	3	P53	0.690725	0.00646234
A12	4	P53	0.694232	0.00996935
A12	5	P53	0.695581	0.0113177
A12	6	P53	0.695746	0.0114831
A12	7	P53	0.697978	0.0137154
A12	8	P53	0.697798	0.0135352
A12	9	P53	0.700178	0.0159152
A12	10	P53	0.70295	0.018687
A12	11	P53	0.704228	0.0199654
A12	12	P53	0.705389	0.0211257
A12	13	P53	0.704316	0.0200531
A12	14	P53	0.706598	0.0223353
A12	15	P53	0.706166	0.021903
A12	16	P53	0.707519	0.0232564
A12	17	P53	0.709249	0.0249864
A12	18	P53	0.709693	0.0254303
A12	19	P53	0.711793	0.0275298
A12	20	P53	0.711032	0.0267694
A12	21	P53	0.713123	0.0288601
A12	22	P53	0.722434	0.0381707
A12	23	P53	0.736732	0.0524693
A12	24	P53	0.759022	0.0747592
A12	25	P53	0.809927	0.125664
A12	26	P53	0.887705	0.203442
A12	27	P53	1.01458	0.330319
A12	28	P53	1.18831	0.504044
A12	29	P53	1.39895	0.714683
A12	30	P53	1.62878	0.94452
A12	31	P53	1.86266	1.1784
A12	32	P53	2.10131	1.41705
A12	33	P53	2.33214	1.64787
A12	34	P53	2.54868	1.86442
A12	35	P53	2.74803	2.06376
A12	36	P53	2.92419	2.23993
A12	37	P53	3.10792	2.42366
A12	38	P53	3.24208	2.55782
A12	39	P53	3.37437	2.6901
A12	40	P53	3.48621	2.80195
B4	1	P53	1.53165	0
B4	2	P53	1.53483	0.00317776
B4	3	P53	1.53643	0.00478089
B4	4	P53	1.54903	0.0173784
B4	5	P53	1.55091	0.0192615
B4	6	P53	1.55706	0.025405
B4	7	P53	1.56817	0.0365175
B4	8	P53	1.56929	0.037644
B4	9	P53	1.5538	0.0221473
B4	10	P53	1.57437	0.0427235
B4	11	P53	1.56783	0.0361838
B4	12	P53	1.5761	0.0444489
B4	13	P53	1.5689	0.0372521
B4	14	P53	1.56494	0.0332892
B4	15	P53	1.59054	0.0588895
B4	16	P53	1.5928	0.0611463
B4	17	P53	1.59585	0.064199
B4	18	P53	1.60336	0.0717127
B4	19	P53	1.60787	0.0762233
B4	20	P53	1.61638	0.0847293
B4	21	P53	1.62677	0.0951174
B4	22	P53	1.67877	0.147115
B4	23	P53	1.74302	0.211374
B4	24	P53	1.82423	0.292582
B4	25	P53	2.01202	0.48037
B4	26	P53	2.24108	0.709429
B4	27	P53	2.50652	0.974874
B4	28	P53	2.7982	1.26655
B4	29	P53	3.09624	1.56459
B4	30	P53	3.40186	1.87021
B4	31	P53	3.62087	2.08922
B4	32	P53	3.91464	2.38299
B4	33	P53	4.22879	2.69713
B4	34	P53	4.44762	2.91597
B4	35	P53	4.72734	3.19569
B4	36	P53	4.95265	3.421
B4	37	P53	5.05254	3.52089
B4	38	P53	5.34464	3.81299
B4	39	P53	5.56449	4.03284
B4	40	P53	5.70156	4.16991
B5	1	P53	1.59665	0
B5	2	P53	1.60648	0.00983834
B5	3	P53	1.6196	0.0229492
B5	4	P53	1.62578	0.0291364
B5	5	P53	1.63714	0.0404937
B5	6	P53	1.63512	0.0384698
B5	7	P53	1.63583	0.0391853
B5	8	P53	1.64245	0.0458028
B5	9	P53	1.64224	0.0455917
B5	10	P53	1.65582	0.0591785
B5	11	P53	1.65296	0.0563151
B5	12	P53	1.65941	0.0627646
B5	13	P53	1.66649	0.0698462
B5	14	P53	1.66306	0.066413
B5	15	P53	1.66773	0.0710869
B5	16	P53	1.66869	0.0720398
B5	17	P53	1.66767	0.0710243
B5	18	P53	1.68125	0.0846083
B5	19	P53	1.68929	0.0926416
B5	20	P53	1.70139	0.104743
B5	21	P53	1.71077	0.114126
B5	22	P53	1.72476	0.128116
B5	23	P53	1.75298	0.156337
B5	24	P53	1.80031	0.203662
B5	25	P53	1.89865	0.302002
B5	26	P53	2.03536	0.43871
B5	27	P53	2.246	0.649358
B5	28	P53	2.50087	0.904227
B5	29	P53	2.78308	1.18643
B5	30	P53	3.07069	1.47404
B5	31	P53	3.33166	1.73502
B5	32	P53	3.62899	2.03234
B5	33	P53	3.8935	2.29685
B5	34	P53	4.17141	2.57477
B5	35	P53	4.42991	2.83327
B5	36	P53	4.64922	3.05257
B5	37	P53	4.8893	3.29266
B5	38	P53	5.11609	3.51944
B5	39	P53	5.3009	3.70425
B5	40	P53	5.50143	3.90479
B6	1	P53	0.604527	0
B6	2	P53	0.611732	0.00720459
B6	3	P53	0.611018	0.00649154
B6	4	P53	0.613063	0.00853592
B6	5	P53	0.619333	0.0148065
B6	6	P53	0.620633	0.0161061
B6	7	P53	0.623004	0.018477
B6	8	P53	0.621104	0.0165774
B6	9	P53	0.624304	0.0197768
B6	10	P53	0.624274	0.0197473
B6	11	P53	0.624998	0.0204714
B6	12	P53	0.628975	0.0244483
B6	13	P53	0.632705	0.0281784
B6	14	P53	0.632562	0.0280347
B6	15	P53	0.634136	0.0296087
B6	16	P53	0.634078	0.0295509
B6	17	P53	0.63724	0.0327135
B6	18	P53	0.638928	0.0344008
B6	19	P53	0.646678	0.0421507
B6	20	P53	0.651385	0.0468579
B6	21	P53	0.664498	0.0599712
B6	22	P53	0.690205	0.0856785
B6	23	P53	0.730543	0.126016
B6	24	P53	0.804712	0.200185
B6	25	P53	0.931612	0.327085
B6	26	P53	1.11198	0.507458
B6	27	P53	1.34238	0.737856
B6	28	P53	1.59596	0.991429
B6	29	P53	1.86379	1.25926
B6	30	P53	2.13103	1.5265
B6	31	P53	2.37292	1.76839
B6	32	P53	2.61145	2.00692
B6	33	P53	2.84927	2.24474
B6	34	P53	3.05157	2.44704
B6	35	P53	3.23576	2.63123
B6	36	P53	3.39266	2.78814
B6	37	P53	3.52976	2.92524
B6	38	P53	3.64477	3.04024
B6	39	P53	3.73811	3.13359
B6	40	P53	3.83333	3.2288
B7	1	P53	0.666108	0
B7	2	P53	0.676607	0.0104988
B7	3	P53	0.678373	0.0122649
B7	4	P53	0.685451	0.0193427
B7	5	P53	0.688318	0.0222102
B7	6	P53	0.688758	0.0226502
B7	7	P53	0.685769	0.0196609
B7	8	P53	0.691398	0.0252897
B7	9	P53	0.690414	0.0243057
B7	10	P53	0.695311	0.0292037
B7	11	P53	0.695723	0.0296152
B7	12	P53	0.697676	0.0315678
B7	13	P53	0.700946	0.034838
B7	14	P53	0.698311	0.0322034
B7	15	P53	0.700481	0.0343735
B7	16	P53	0.699094	0.0329866
B7	17	P53	0.703728	0.0376207
B7	18	P53	0.702817	0.0367095
B7	19	P53	0.709625	0.0435174
B7	20	P53	0.718556	0.0524479
B7	21	P53	0.734461	0.0683535
B7	22	P53	0.763658	0.0975502
B7	23	P53	0.808943	0.142835
B7	24	P53	0.893609	0.227501
B7	25	P53	1.02359	0.35748
B7	26	P53	1.20661	0.540502
B7	27	P53	1.42568	0.759573
B7	28	P53	1.6737	1.00759
B7	29	P53	1.91788	1.25177
B7	30	P53	2.16674	1.50063
B7	31	P53	2.4108	1.74469
B7	32	P53	2.62553	1.95942
B7	33	P53	2.84868	2.18257
B7	34	P53	3.04812	2.38201
B7	35	P53	3.24342	2.57731
B7	36	P53	3.39272	2.72661
B7	37	P53	3.54985	2.88375
B7	38	P53	3.67014	3.00403
B7	39	P53	3.79702	3.13091
B7	40	P53	3.89228	3.22617
B8	1	P53	1.02871	0
B8	2	P53	1.02703	-0.00168908
B8	3	P53	1.03042	0.00170517
B8	4	P53	1.03664	0.00792694
B8	5	P53	1.04012	0.011402
B8	6	P53	1.04029	0.011572
B8	7	P53	1.04445	0.0157396
B8	8	P53	1.05257	0.0238553
B8	9	P53	1.05552	0.0268068
B8	10	P53	1.05342	0.0247053
B8	11	P53	1.05694	0.0282233
B8	12	P53	1.05846	0.0297408
B8	13	P53	1.06491	0.0361909
B8	14	P53	1.06642	0.0377036
B8	15	P53	1.06336	0.0346475
B8	16	P53	1.06858	0.0398693
B8	17	P53	1.07272	0.0440103
B8	18	P53	1.07571	0.0469979
B8	19	P53	1.08153	0.0528154
B8	20	P53	1.08396	0.0552459
B8	21	P53	1.10585	0.0771377
B8	22	P53	1.12589	0.0971769
B8	23	P53	1.1582	0.129486
B8	24	P53	1.23083	0.202114
B8	25	P53	1.35488	0.326162
B8	26	P53	1.53926	0.510545
B8	27	P53	1.77586	0.747142
B8	28	P53	2.03908	1.01036
B8	29	P53	2.31024	1.28152
B8	30	P53	2.60317	1.57445
B8	31	P53	2.87622	1.8475
B8	32	P53	3.14122	2.1125
B8	33	P53	3.39493	2.36621
B8	34	P53	3.63779	2.60907
B8	35	P53	3.86636	2.83764
B8	36	P53	4.06134	3.03262
B8	37	P53	4.27479	3.24607
B8	38	P53	4.44299	3.41428
B8	39	P53	4.6302	3.60149
B8	40	P53	4.79543	3.76671
B9	1	P53	1.76728	0
B9	2	P53	1.7678	0.000527978
B9	3	P53	1.77242	0.00514722
B9	4	P53	1.78008	0.0128003
B9	5	P53	1.7781	0.0108236
B9	6	P53	1.79782	0.0305479
B9	7	P53	1.80913	0.0418544
B9	8	P53	1.80962	0.0423433
B9	9	P53	1.80631	0.0390307
B9	10	P53	1.808	0.0407207
B9	11	P53	1.81871	0.0514288
B9	12	P53	1.81032	0.0430418
B9	13	P53	1.81429	0.0470093
B9	14	P53	1.836	0.0687224
B9	15	P53	1.8332	0.0659196
B9	16	P53	1.83888	0.0716078
B9	17	P53	1.83983	0.0725545
B9	18	P53	1.84341	0.076136
B9	19	P53	1.85208	0.0848016
B9	20	P53	1.87221	0.104934
B9	21	P53	1.8579	0.0906262
B9	22	P53	1.8941	0.126824
B9	23	P53	1.93219	0.164916
B9	24	P53	2.01311	0.245836
B9	25	P53	2.14329	0.376011
B9	26	P53	2.3233	0.556027
B9	27	P53	2.58096	0.81368
B9	28	P53	2.87734	1.11006
B9	29	P53	3.16884	1.40156
B9	30	P53	3.48982	1.72254
B9	31	P53	3.79969	2.03241
B9	32	P53	4.09315	2.32587
B9	33	P53	4.37272	2.60544
B9	34	P53	4.63997	2.87269
B9	35	P53	4.92111	3.15383
B9	36	P53	5.12991	3.36263
B9	37	P53	5.42926	3.66198
B9	38	P53	5.59019	3.82291
B9	39	P53	5.84611	4.07884
B9	40	P53	6.04705	4.27978
B10	1	P53	1.55734	0
B10	2	P53	1.55976	0.00241923
B10	3	P53	1.56258	0.00524378
B10	4	P53	1.57007	0.0127325
B10	5	P53	1.57794	0.0206004
B10	6	P53	1.58978	0.0324408
B10	7	P53	1.59127	0.0339311
B10	8	P53	1.58464	0.0272973
B10	9	P53	1.59041	0.0330666
B10	10	P53	1.59114	0.0338043
B10	11	P53	1.60264	0.0452967
B10	12	P53	1.59811	0.0407745
B10	13	P53	1.59775	0.0404054
B10	14	P53	1.61862	0.0612844
B10	15	P53	1.60766	0.0503243
B10	16	P53	1.6152	0.057856
B10	17	P53	1.62337	0.0660257
B10	18	P53	1.63063	0.0732907
B10	19	P53	1.63371	0.0763657
B10	20	P53	1.63271	0.075372
B10	21	P53	1.64523	0.0878903
B10	22	P53	1.65787	0.100527
B10	23	P53	1.68896	0.131616
B10	24	P53	1.73166	0.17432
B10	25	P53	1.83639	0.279046
B10	26	P53	1.96978	0.412437
B10	27	P53	2.19315	0.635806
B10	28	P53	2.47873	0.921387
B10	29	P53	2.78105	1.22371
B10	30	P53	3.10033	1.54299
B10	31	P53	3.39574	1.8384
B10	32	P53	3.73692	2.17958
B10	33	P53	4.04595	2.48861
B10	34	P53	4.32259	2.76525
B10	35	P53	4.61951	3.06217
B10	36	P53	4.87786	3.32052
B10	37	P53	5.12221	3.56487
B10	38	P53	5.38661	3.82927
B10	39	P53	5.62533	4.06799
B10	40	P53	5.82333	4.26599
B11	1	P53	1.515	0
B11	2	P53	1.51973	0.00473237
B11	3	P53	1.5275	0.0124962
B11	4	P53	1.53688	0.0218803
B11	5	P53	1.53816	0.0231583
B11	6	P53	1.53239	0.0173922
B11	7	P53	1.54426	0.0292618
B11	8	P53	1.55007	0.035069
B11	9	P53	1.54104	0.0260369
B11	10	P53	1.55708	0.0420758
B11	11	P53	1.55171	0.0367144
B11	12	P53	1.56491	0.0499098
B11	13	P53	1.5639	0.0488986
B11	14	P53	1.56972	0.0547205
B11	15	P53	1.57838	0.0633779
B11	16	P53	1.58073	0.0657271
B11	17	P53	1.58433	0.069331
B11	18	P53	1.5809	0.065897
B11	19	P53	1.59452	0.0795254
B11	20	P53	1.59236	0.0773618
B11	21	P53	1.60096	0.0859579
B11	22	P53	1.61661	0.101611
B11	23	P53	1.64848	0.133483
B11	24	P53	1.70695	0.191947
B11	25	P53	1.81317	0.298175
B11	26	P53	1.97013	0.455133
B11	27	P53	2.19825	0.68325
B11	28	P53	2.48109	0.966091
B11	29	P53	2.80544	1.29044
B11	30	P53	3.11354	1.59855
B11	31	P53	3.41794	1.90294
B11	32	P53	3.72431	2.20931
B11	33	P53	4.04103	2.52603
B11	34	P53	4.34275	2.82775
B11	35	P53	4.60294	3.08794
B11	36	P53	4.78156	3.26656
B11	37	P53	5.06922	3.55422
B11	38	P53	5.25342	3.73842
B11	39	P53	5.49724	3.98224
B11	40	P53	5.69643	4.18143
B12	1	P53	1.45848	0
B12	2	P53	1.46591	0.00742829
B12	3	P53	1.47329	0.0148073
B12	4	P53	1.47904	0.0205523
B12	5	P53	1.48383	0.0253458
B12	6	P53	1.48808	0.0295917
B12	7	P53	1.49059	0.0321062
B12	8	P53	1.49216	0.0336745
B12	9	P53	1.4926	0.0341152
B12	10	P53	1.49604	0.0375518
B12	11	P53	1.50368	0.0451994
B12	12	P53	1.50803	0.0495461
B12	13	P53	1.51621	0.0577291
B12	14	P53	1.51704	0.0585593
B12	15	P53	1.52542	0.0669317
B12	16	P53	1.52513	0.0666498
B12	17	P53	1.52891	0.0704229
B12	18	P53	1.52662	0.0681324
B12	19	P53	1.53628	0.0777981
B12	20	P53	1.53278	0.0742908
B12	21	P53	1.54792	0.0894349
B12	22	P53	1.56106	0.102571
B12	23	P53	1.59683	0.138347
B12	24	P53	1.64749	0.189009
B12	25	P53	1.75257	0.294081
B12	26	P53	1.89461	0.436125
B12	27	P53	2.13715	0.678668
B12	28	P53	2.4092	0.950714
B12	29	P53	2.69201	1.23352
B12	30	P53	2.9896	1.53111
B12	31	P53	3.28704	1.82855
B12	32	P53	3.59526	2.13678
B12	33	P53	3.8752	2.41671
B12	34	P53	4.1383	2.67981
B12	35	P53	4.39458	2.9361
B12	36	P53	4.61967	3.16119
B12	37	P53	4.8617	3.40321
B12	38	P53	5.0485	3.59001
B12	39	P53	5.26904	3.81055
B12	40	P53	5.47781	4.01932
C4	1	P53	1.97638	0
C4	2	P53	1.98723	0.0108519
C4	3	P53	1.97841	0.00203657
C4	4	P53	1.98146	0.00507939
C4	5	P53	1.99242	0.0160393
C4	6	P53	1.99924	0.0228652
C4	7	P53	2.01805	0.0416776
C4	8	P53	2.02053	0.0441498
C4	9	P53	2.02245	0.0460774
C4	10	P53	2.02524	0.0488645
C4	11	P53	2.03472	0.058338
C4	12	P53	2.032	0.0556227
C4	13	P53	2.04921	0.0728284
C4	14	P53	2.05255	0.0761772
C4	15	P53	2.05578	0.0794076
C4	16	P53	2.06336	0.0869838
C4	17	P53	2.06399	0.0876087
C4	18	P53	2.06903	0.0926567
C4	19	P53	2.08118	0.104808
C4	20	P53	2.07756	0.101188
C4	21	P53	2.0957	0.119321
C4	22	P53	2.1113	0.134922
C4	23	P53	2.13598	0.159604
C4	24	P53	2.18088	0.204498
C4	25	P53	2.26865	0.292273
C4	26	P53	2.42183	0.445455
C4	27	P53	2.65259	0.676216
C4	28	P53	2.98332	1.00694
C4	29	P53	3.32396	1.34759
C4	30	P53	3.74761	1.77124
C4	31	P53	4.16682	2.19044
C4	32	P53	4.57919	2.60281
C4	33	P53	4.96227	2.98589
C4	34	P53	5.36227	3.38589
C4	35	P53	5.71124	3.73487
C4	36	P53	6.09104	4.11466
C4	37	P53	6.43312	4.45674
C4	38	P53	6.78933	4.81296
C4	39	P53	7.07807	5.10169
C4	40	P53	7.38621	5.40984
C5	1	P53	2.00486	0
C5	2	P53	2.01824	0.0133741
C5	3	P53	2.01897	0.0141101
C5	4	P53	2.03649	0.0316277
C5	5	P53	2.04339	0.0385308
C5	6	P53	2.04163	0.0367703
C5	7	P53	2.05485	0.0499859
C5	8	P53	2.0662	0.061337
C5	9	P53	2.06866	0.0638013
C5	10	P53	2.05936	0.0544963
C5	11	P53	2.07842	0.0735571
C5	12	P53	2.07718	0.0723131
C5	13	P53	2.08989	0.0850224
C5	14	P53	2.08933	0.0844634
C5	15	P53	2.09796	0.0930991
C5	16	P53	2.09812	0.0932577
C5	17	P53	2.10306	0.0981958
C5	18	P53	2.10291	0.0980458
C5	19	P53	2.09818	0.0933127
C5	20	P53	2.11137	0.106504
C5	21	P53	2.12157	0.116705
C5	22	P53	2.12449	0.119622
C5	23	P53	2.16497	0.16011
C5	24	P53	2.20335	0.198485
C5	25	P53	2.27469	0.269829
C5	26	P53	2.39169	0.386828
C5	27	P53	2.60812	0.60326
C5	28	P53	2.88108	0.876221
C5	29	P53	3.22335	1.21849
C5	30	P53	3.58951	1.58465
C5	31	P53	3.9358	1.93093
C5	32	P53	4.2861	2.28123
C5	33	P53	4.63128	2.62641
C5	34	P53	4.95806	2.9532
C5	35	P53	5.28888	3.28402
C5	36	P53	5.56311	3.55825
C5	37	P53	5.8941	3.88923
C5	38	P53	6.15979	4.15492
C5	39	P53	6.41008	4.40522
C5	40	P53	6.6774	4.67253
C6	1	P53	1.98853	0
C6	2	P53	2.0073	0.0187684
C6	3	P53	2.01346	0.0249351
C6	4	P53	2.02706	0.0385319
C6	5	P53	2.02866	0.0401367
C6	6	P53	2.04092	0.0523936
C6	7	P53	2.04789	0.0593632
C6	8	P53	2.06083	0.0722979
C6	9	P53	2.06837	0.0798465
C6	10	P53	2.06465	0.0761186
C6	11	P53	2.07426	0.0857357
C6	12	P53	2.07534	0.0868155
C6	13	P53	2.07615	0.0876187
C6	14	P53	2.09022	0.101689
C6	15	P53	2.09052	0.101988
C6	16	P53	2.08313	0.0946051
C6	17	P53	2.08861	0.100078
C6	18	P53	2.11426	0.125727
C6	19	P53	2.09756	0.109028
C6	20	P53	2.11383	0.125304
C6	21	P53	2.12136	0.132831
C6	22	P53	2.13066	0.142127
C6	23	P53	2.15476	0.166229
C6	24	P53	2.19067	0.202137
C6	25	P53	2.27357	0.285037
C6	26	P53	2.40667	0.418145
C6	27	P53	2.60741	0.618883
C6	28	P53	2.88713	0.8986
C6	29	P53	3.24346	1.25494
C6	30	P53	3.61087	1.62234
C6	31	P53	3.99733	2.0088
C6	32	P53	4.37537	2.38684
C6	33	P53	4.74282	2.75429
C6	34	P53	5.09927	3.11074
C6	35	P53	5.44697	3.45844
C6	36	P53	5.77155	3.78302
C6	37	P53	6.06144	4.07291
C6	38	P53	6.35968	4.37115
C6	39	P53	6.66174	4.67321
C6	40	P53	6.90893	4.9204
C7	1	P53	1.98552	0
C7	2	P53	1.9893	0.00377762
C7	3	P53	2.00357	0.018051
C7	4	P53	2.01238	0.0268604
C7	5	P53	2.00358	0.0180589
C7	6	P53	1.99708	0.0115541
C7	7	P53	2.0136	0.0280768
C7	8	P53	2.03613	0.0506078
C7	9	P53	2.02519	0.0396734
C7	10	P53	2.02396	0.0384382
C7	11	P53	2.04114	0.0556155
C7	12	P53	2.04427	0.0587529
C7	13	P53	2.05814	0.0726234
C7	14	P53	2.07548	0.0899621
C7	15	P53	2.07179	0.086264
C7	16	P53	2.06541	0.0798906
C7	17	P53	2.0652	0.0796806
C7	18	P53	2.08683	0.101309
C7	19	P53	2.09427	0.108747
C7	20	P53	2.08145	0.0959264
C7	21	P53	2.10744	0.121918
C7	22	P53	2.11064	0.12512
C7	23	P53	2.11594	0.130417
C7	24	P53	2.13075	0.145232
C7	25	P53	2.18683	0.201309
C7	26	P53	2.25634	0.270822
C7	27	P53	2.40463	0.419112
C7	28	P53	2.59685	0.611324
C7	29	P53	2.88834	0.902821
C7	30	P53	3.21584	1.23032
C7	31	P53	3.55781	1.57229
C7	32	P53	3.92259	1.93707
C7	33	P53	4.25946	2.27394
C7	34	P53	4.60039	2.61487
C7	35	P53	4.96476	2.97923
C7	36	P53	5.29476	3.30924
C7	37	P53	5.63191	3.64639
C7	38	P53	5.88753	3.90201
C7	39	P53	6.15991	4.17439
C7	40	P53	6.41447	4.42895
C8	1	P53	1.94975	0
C8	2	P53	1.94295	-0.00680673
C8	3	P53	1.96238	0.0126235
C8	4	P53	1.98256	0.0328053
C8	5	P53	1.98494	0.0351893
C8	6	P53	1.98798	0.0382257
C8	7	P53	1.98821	0.0384597
C8	8	P53	2.00013	0.0503819
C8	9	P53	2.00624	0.056484
C8	10	P53	2.00915	0.0593967
C8	11	P53	2.01625	0.0665016
C8	12	P53	2.01054	0.0607884
C8	13	P53	2.02233	0.0725806
C8	14	P53	2.02589	0.0761404
C8	15	P53	2.0321	0.0823443
C8	16	P53	2.03505	0.0852966
C8	17	P53	2.05339	0.103632
C8	18	P53	2.04583	0.0960779
C8	19	P53	2.04589	0.096139
C8	20	P53	2.06265	0.112895
C8	21	P53	2.06233	0.112579
C8	22	P53	2.07213	0.122373
C8	23	P53	2.08796	0.138208
C8	24	P53	2.10828	0.158525
C8	25	P53	2.14552	0.195765
C8	26	P53	2.23638	0.286625
C8	27	P53	2.36615	0.416402
C8	28	P53	2.5875	0.637745
C8	29	P53	2.85483	0.905079
C8	30	P53	3.20425	1.2545
C8	31	P53	3.53749	1.58774
C8	32	P53	3.88821	1.93846
C8	33	P53	4.23281	2.28306
C8	34	P53	4.56874	2.61898
C8	35	P53	4.88137	2.93162
C8	36	P53	5.19503	3.24528
C8	37	P53	5.47918	3.52943
C8	38	P53	5.73391	3.78416
C8	39	P53	5.99446	4.04471
C8	40	P53	6.26527	4.31551
C9	1	P53	1.96675	0
C9	2	P53	1.97263	0.00588417
C9	3	P53	1.97726	0.01051
C9	4	P53	1.99694	0.0301923
C9	5	P53	1.99663	0.0298805
C9	6	P53	2.00416	0.0374093
C9	7	P53	2.01187	0.0451202
C9	8	P53	2.01103	0.0442758
C9	9	P53	2.01311	0.0463631
C9	10	P53	2.03627	0.0695217
C9	11	P53	2.03313	0.0663774
C9	12	P53	2.03749	0.0707438
C9	13	P53	2.02684	0.0600886
C9	14	P53	2.03906	0.072314
C9	15	P53	2.03667	0.0699191
C9	16	P53	2.04363	0.0768824
C9	17	P53	2.04227	0.0755246
C9	18	P53	2.05507	0.0883234
C9	19	P53	2.06652	0.0997708
C9	20	P53	2.06938	0.102632
C9	21	P53	2.0747	0.107952
C9	22	P53	2.07189	0.105137
C9	23	P53	2.08558	0.118829
C9	24	P53	2.1071	0.140351
C9	25	P53	2.13373	0.16698
C9	26	P53	2.19218	0.225427
C9	27	P53	2.29529	0.328541
C9	28	P53	2.44472	0.477975
C9	29	P53	2.6777	0.710949
C9	30	P53	2.97874	1.01199
C9	31	P53	3.29324	1.32649
C9	32	P53	3.60763	1.64088
C9	33	P53	3.92474	1.95799
C9	34	P53	4.27205	2.3053
C9	35	P53	4.57613	2.60938
C9	36	P53	4.89821	2.93146
C9	37	P53	5.20919	3.24244
C9	38	P53	5.45749	3.49074
C9	39	P53	5.6688	3.70205
C9	40	P53	5.95859	3.99184
C10	1	P53	2.04975	0
C10	2	P53	2.02937	-0.0203764
C10	3	P53	2.04969	-6.1512e-05
C10	4	P53	2.06442	0.0146739
C10	5	P53	2.07731	0.0275633
C10	6	P53	2.08127	0.0315208
C10	7	P53	2.08092	0.0311782
C10	8	P53	2.09703	0.0472884
C10	9	P53	2.09758	0.047832
C10	10	P53	2.10559	0.0558476
C10	11	P53	2.10664	0.0568931
C10	12	P53	2.10256	0.0528171
C10	13	P53	2.11288	0.0631366
C10	14	P53	2.12492	0.0751746
C10	15	P53	2.12707	0.0773251
C10	16	P53	2.13874	0.0889935
C10	17	P53	2.14574	0.0959947
C10	18	P53	2.14526	0.0955086
C10	19	P53	2.14776	0.0980115
C10	20	P53	2.16106	0.11131
C10	21	P53	2.17689	0.127145
C10	22	P53	2.1828	0.133052
C10	23	P53	2.20437	0.154624
C10	24	P53	2.22713	0.17738
C10	25	P53	2.29597	0.246224
C10	26	P53	2.41333	0.363585
C10	27	P53	2.60696	0.557214
C10	28	P53	2.88414	0.834396
C10	29	P53	3.20752	1.15777
C10	30	P53	3.57003	1.52028
C10	31	P53	3.93271	1.88297
C10	32	P53	4.30502	2.25527
C10	33	P53	4.67415	2.6244
C10	34	P53	5.01385	2.96411
C10	35	P53	5.36919	3.31944
C10	36	P53	5.67342	3.62367
C10	37	P53	5.98894	3.93919
C10	38	P53	6.27075	4.221
C10	39	P53	6.54974	4.49999
C10	40	P53	6.77881	4.72906
C11	1	P53	2.01345	0
C11	2	P53	2.03603	0.0225749
C11	3	P53	2.03807	0.024616
C11	4	P53	2.06506	0.0516057
C11	5	P53	2.06634	0.0528829
C11	6	P53	2.06965	0.0561993
C11	7	P53	2.07229	0.0588408
C11	8	P53	2.0791	0.0656438
C11	9	P53	2.09867	0.0852218
C11	10	P53	2.0953	0.0818481
C11	11	P53	2.09904	0.0855885
C11	12	P53	2.10939	0.0959365
C11	13	P53	2.11026	0.0968099
C11	14	P53	2.10691	0.0934544
C11	15	P53	2.11984	0.106392
C11	16	P53	2.12795	0.114495
C11	17	P53	2.12608	0.112627
C11	18	P53	2.14293	0.12948
C11	19	P53	2.1509	0.137445
C11	20	P53	2.15815	0.144696
C11	21	P53	2.15818	0.144731
C11	22	P53	2.17534	0.161884
C11	23	P53	2.18603	0.172573
C11	24	P53	2.24479	0.231338
C11	25	P53	2.30639	0.292933
C11	26	P53	2.43833	0.424879
C11	27	P53	2.66108	0.647632
C11	28	P53	2.94581	0.932362
C11	29	P53	3.31006	1.29661
C11	30	P53	3.68656	1.67311
C11	31	P53	4.07271	2.05925
C11	32	P53	4.45295	2.43949
C11	33	P53	4.85698	2.84353
C11	34	P53	5.22928	3.21583
C11	35	P53	5.55246	3.539
C11	36	P53	5.83191	3.81846
C11	37	P53	6.13513	4.12167
C11	38	P53	6.43737	4.42392
C11	39	P53	6.72016	4.70671
C11	40	P53	6.99826	4.98481
C12	1	P53	1.90738	0
C12	2	P53	1.90159	-0.00578737
C12	3	P53	1.91567	0.00829422
C12	4	P53	1.92995	0.0225693
C12	5	P53	1.92674	0.0193651
C12	6	P53	1.93268	0.0253032
C12	7	P53	1.93587	0.0284879
C12	8	P53	1.92671	0.0193366
C12	9	P53	1.9318	0.0244184
C12	10	P53	1.94276	0.0353853
C12	11	P53	1.95115	0.0437768
C12	12	P53	1.975	0.0676193
C12	13	P53	1.96069	0.0533154
C12	14	P53	1.96779	0.0604086
C12	15	P53	1.96709	0.0597081
C12	16	P53	1.96936	0.0619811
C12	17	P53	1.97573	0.0683522
C12	18	P53	1.97814	0.0707611
C12	19	P53	1.981	0.0736235
C12	20	P53	1.98781	0.0804297
C12	21	P53	1.99247	0.0850922
C12	22	P53	2.0151	0.107723
C12	23	P53	2.03271	0.125335
C12	24	P53	2.06663	0.15925
C12	25	P53	2.13796	0.230578
C12	26	P53	2.23636	0.328981
C12	27	P53	2.40781	0.50043
C12	28	P53	2.68267	0.775292
C12	29	P53	2.97229	1.06491
C12	30	P53	3.30149	1.39412
C12	31	P53	3.63752	1.73014
C12	32	P53	3.99179	2.08442
C12	33	P53	4.30605	2.39867
C12	34	P53	4.63613	2.72876
C12	35	P53	4.92336	3.01598
C12	36	P53	5.1607	3.25333
C12	37	P53	5.43984	3.53246
C12	38	P53	5.67291	3.76553
C12	39	P53	5.94849	4.04112
C12	40	P53	6.15867	4.25129
D4	1	18S	0.120306	0
D4	2	18S	0.120517	0.000210747
D4	3	18S	0.121722	0.00141619
D4	4	18S	0.122286	0.00197951
D4	5	18S	0.123096	0.0027893
D4	6	18S	0.124593	0.00428689
D4	7	18S	0.125798	0.00549176
D4	8	18S	0.127558	0.00725156
D4	9	18S	0.131324	0.0110177
D4	10	18S	0.13271	0.012404
D4	11	18S	0.136677	0.0163705
D4	12	18S	0.140845	0.0205387
D4	13	18S	0.147541	0.0272345
D4	14	18S	0.153246	0.0329399
D4	15	18S	0.157896	0.0375894
D4	16	18S	0.163488	0.0431815
D4	17	18S	0.170616	0.0503097
D4	18	18S	0.176879	0.0565729
D4	19	18S	0.18354	0.0632338
D4	20	18S	0.190648	0.0703414
D4	21	18S	0.19764	0.0773339
D4	22	18S	0.202809	0.0825027
D4	23	18S	0.209494	0.0891881
D4	24	18S	0.218603	0.0982971
D4	25	18S	0.221708	0.101401
D4	26	18S	0.227388	0.107082
D4	27	18S	0.233358	0.113052
D4	28	18S	0.237944	0.117638
D4	29	18S	0.242131	0.121825
D4	30	18S	0.246723	0.126417
D4	31	18S	0.254071	0.133765
D4	32	18S	0.25711	0.136803
D4	33	18S	0.259651	0.139344
D4	34	18S	0.263758	0.143451
D4	35	18S	0.265933	0.145627
D4	36	18S	0.2693	0.148994
D4	37	18S	0.27616	0.155854
D4	38	18S	0.275953	0.155646
D4	39	18S	0.277833	0.157527
D4	40	18S	0.28148	0.161174
D5	1	18S	0.112659	0
D5	2	18S	0.11319	0.000530817
D5	3	18S	0.114143	0.00148367
D5	4	18S	0.115316	0.00265684
D5	5	18S	0.115005	0.00234607
D5	6	18S	0.116017	0.0033575
D5	7	18S	0.117404	0.00474425
D5	8	18S	0.118307	0.00564779
D5	9	18S	0.11991	0.00725051
D5	10	18S	0.122704	0.0100451
D5	11	18S	0.12616	0.0135001
D5	12	18S	0.131567	0.018908
D5	13	18S	0.136242	0.0235828
D5	14	18S	0.142852	0.0301926
D5	15	18S	0.149803	0.0371431
D5	16	18S	0.15686	0.0442002
D5	17	18S	0.164437	0.0517777
D5	18	18S	0.171257	0.0585971
D5	19	18S	0.179437	0.0667775
D5	20	18S	0.186856	0.0741968
D5	21	18S	0.194368	0.0817088
D5	22	18S	0.201836	0.0891767
D5	23	18S	0.208194	0.0955343
D5	24	18S	0.214161	0.101501
D5	25	18S	0.220802	0.108142
D5	26	18S	0.226095	0.113436
D5	27	18S	0.231612	0.118953
D5	28	18S	0.23697	0.124311
D5	29	18S	0.242465	0.129806
D5	30	18S	0.246947	0.134288
D5	31	18S	0.251709	0.13905
D5	32	18S	0.255251	0.142592
D5	33	18S	0.259593	0.146933
D5	34	18S	0.263101	0.150442
D5	35	18S	0.266942	0.154283
D5	36	18S	0.269762	0.157102
D5	37	18S	0.272005	0.159346
D5	38	18S	0.275333	0.162674
D5	39	18S	0.278067	0.165407
D5	40	18S	0.280242	0.167582
D6	1	18S	0.0864713	0
D6	2	18S	0.0886644	0.00219309
D6	3	18S	0.089363	0.00289167
D6	4	18S	0.0904018	0.00393049
D6	5	18S	0.0913727	0.00490136
D6	6	18S	0.0932562	0.00678491
D6	7	18S	0.0942834	0.00781209
D6	8	18S	0.0969055	0.0104341
D6	9	18S	0.0995405	0.0130691
D6	10	18S	0.103273	0.0168014
D6	11	18S	0.108067	0.0215953
D6	12	18S	0.113533	0.0270617
D6	13	18S	0.119507	0.0330359
D6	14	18S	0.126537	0.0400659
D6	15	18S	0.134323	0.0478521
D6	16	18S	0.142041	0.0555697
D6	17	18S	0.148975	0.0625041
D6	18	18S	0.157234	0.070763
D6	19	18S	0.164229	0.0777575
D6	20	18S	0.171427	0.0849555
D6	21	18S	0.177958	0.0914867
D6	22	18S	0.18435	0.0978787
D6	23	18S	0.190571	0.104099
D6	24	18S	0.196306	0.109835
D6	25	18S	0.201105	0.114634
D6	26	18S	0.206415	0.119944
D6	27	18S	0.210571	0.124099
D6	28	18S	0.216601	0.13013
D6	29	18S	0.219431	0.13296
D6	30	18S	0.222992	0.13652
D6	31	18S	0.226581	0.14011
D6	32	18S	0.229357	0.142886
D6	33	18S	0.232273	0.145802
D6	34	18S	0.23536	0.148889
D6	35	18S	0.23852	0.152049
D6	36	18S	0.239565	0.153093
D6	37	18S	0.242275	0.155804
D6	38	18S	0.245909	0.159438
D6	39	18S	0.247652	0.161181
D6	40	18S	0.249223	0.162751
D7	1	18S	0.102657	0
D7	2	18S	0.103514	0.000857145
D7	3	18S	0.104246	0.0015886
D7	4	18S	0.1056	0.00294322
D7	5	18S	0.105862	0.00320451
D7	6	18S	0.10674	0.00408321
D7	7	18S	0.107416	0.00475889
D7	8	18S	0.108953	0.0062959
D7	9	18S	0.110274	0.0076171
D7	10	18S	0.113262	0.0106044
D7	11	18S	0.11573	0.0130732
D7	12	18S	0.120015	0.0173579
D7	13	18S	0.12406	0.0214032
D7	14	18S	0.131017	0.0283593
D7	15	18S	0.137115	0.0344575
D7	16	18S	0.143302	0.0406445
D7	17	18S	0.150434	0.047777
D7	18	18S	0.158285	0.0556277
D7	19	18S	0.16591	0.0632529
D7	20	18S	0.172658	0.0700007
D7	21	18S	0.180984	0.0783269
D7	22	18S	0.188405	0.0857474
D7	23	18S	0.195347	0.09269
D7	24	18S	0.201338	0.0986807
D7	25	18S	0.208738	0.106081
D7	26	18S	0.214542	0.111884
D7	27	18S	0.221042	0.118385
D7	28	18S	0.226797	0.12414
D7	29	18S	0.231502	0.128845
D7	30	18S	0.235887	0.133229
D7	31	18S	0.239914	0.137257
D7	32	18S	0.244267	0.14161
D7	33	18S	0.247919	0.145262
D7	34	18S	0.250191	0.147533
D7	35	18S	0.254615	0.151957
D7	36	18S	0.257574	0.154917
D7	37	18S	0.260164	0.157507
D7	38	18S	0.263069	0.160411
D7	39	18S	0.266197	0.16354
D7	40	18S	0.269564	0.166907
D8	1	18S	0.0969599	0
D8	2	18S	0.0979687	0.00100885
D8	3	18S	0.0980762	0.00111628
D8	4	18S	0.0986118	0.00165189
D8	5	18S	0.0999117	0.00295183
D8	6	18S	0.100079	0.00311959
D8	7	18S	0.100858	0.00389821
D8	8	18S	0.101875	0.00491481
D8	9	18S	0.103065	0.00610538
D8	10	18S	0.104614	0.00765409
D8	11	18S	0.107634	0.0106738
D8	12	18S	0.110758	0.0137985
D8	13	18S	0.114715	0.0177554
D8	14	18S	0.119985	0.0230249
D8	15	18S	0.125836	0.0288757
D8	16	18S	0.131853	0.0348936
D8	17	18S	0.138141	0.0411806
D8	18	18S	0.145518	0.0485581
D8	19	18S	0.151993	0.0550335
D8	20	18S	0.15934	0.0623798
D8	21	18S	0.166106	0.0691464
D8	22	18S	0.173564	0.0766042
D8	23	18S	0.179763	0.082803
D8	24	18S	0.186009	0.089049
D8	25	18S	0.192104	0.0951439
D8	26	18S	0.197666	0.100706
D8	27	18S	0.203247	0.106287
D8	28	18S	0.208891	0.111931
D8	29	18S	0.213181	0.116221
D8	30	18S	0.218434	0.121475
D8	31	18S	0.222527	0.125567
D8	32	18S	0.226556	0.129596
D8	33	18S	0.230341	0.133381
D8	34	18S	0.234133	0.137173
D8	35	18S	0.237172	0.140212
D8	36	18S	0.240032	0.143072
D8	37	18S	0.243528	0.146568
D8	38	18S	0.245407	0.148447
D8	39	18S	0.248872	0.151912
D8	40	18S	0.251391	0.154431
D9	1	18S	0.105652	0
D9	2	18S	0.105724	7.14809e-05
D9	3	18S	0.106414	0.000761695
D9	4	18S	0.107533	0.00188056
D9	5	18S	0.107669	0.00201684
D9	6	18S	0.107832	0.00217982
D9	7	18S	0.108664	0.00301155
D9	8	18S	0.109949	0.0042972
D9	9	18S	0.111458	0.00580574
D9	10	18S	0.113227	0.00757498
D9	11	18S	0.115925	0.0102724
D9	12	18S	0.118453	0.0128008
D9	13	18S	0.122903	0.0172505
D9	14	18S	0.128155	0.0225026
D9	15	18S	0.134362	0.0287097
D9	16	18S	0.14069	0.0350376
D9	17	18S	0.147237	0.0415845
D9	18	18S	0.154342	0.0486898
D9	19	18S	0.162234	0.0565822
D9	20	18S	0.169913	0.0642607
D9	21	18S	0.176357	0.0707043
D9	22	18S	0.183125	0.0774724
D9	23	18S	0.190355	0.0847026
D9	24	18S	0.195836	0.0901835
D9	25	18S	0.202612	0.0969597
D9	26	18S	0.208217	0.102565
D9	27	18S	0.213883	0.10823
D9	28	18S	0.218709	0.113056
D9	29	18S	0.224065	0.118413
D9	30	18S	0.229211	0.123558
D9	31	18S	0.233581	0.127928
D9	32	18S	0.23718	0.131528
D9	33	18S	0.241455	0.135803
D9	34	18S	0.244076	0.138424
D9	35	18S	0.24765	0.141997
D9	36	18S	0.25051	0.144858
D9	37	18S	0.2532	0.147548
D9	38	18S	0.256015	0.150363
D9	39	18S	0.258206	0.152554
D9	40	18S	0.261306	0.155654
D10	1	18S	0.114627	0
D10	2	18S	0.113993	-0.000634246
D10	3	18S	0.114775	0.00014817
D10	4	18S	0.114833	0.000206091
D10	5	18S	0.115843	0.00121564
D10	6	18S	0.11578	0.00115326
D10	7	18S	0.116717	0.00208955
D10	8	18S	0.116924	0.0022971
D10	9	18S	0.117021	0.00239428
D10	10	18S	0.116952	0.00232479
D10	11	18S	0.118709	0.0040822
D10	12	18S	0.120544	0.00591648
D10	13	18S	0.122166	0.00753848
D10	14	18S	0.127016	0.0123889
D10	15	18S	0.131153	0.0165261
D10	16	18S	0.136718	0.0220906
D10	17	18S	0.14332	0.028693
D10	18	18S	0.150094	0.0354671
D10	19	18S	0.157259	0.0426321
D10	20	18S	0.164688	0.0500614
D10	21	18S	0.171193	0.0565664
D10	22	18S	0.178613	0.0639863
D10	23	18S	0.18597	0.0713429
D10	24	18S	0.192803	0.0781757
D10	25	18S	0.199996	0.0853688
D10	26	18S	0.206156	0.0915293
D10	27	18S	0.212632	0.0980048
D10	28	18S	0.218698	0.104071
D10	29	18S	0.224355	0.109728
D10	30	18S	0.229434	0.114807
D10	31	18S	0.234813	0.120185
D10	32	18S	0.239313	0.124686
D10	33	18S	0.243553	0.128926
D10	34	18S	0.247137	0.132509
D10	35	18S	0.251415	0.136788
D10	36	18S	0.254519	0.139892
D10	37	18S	0.257615	0.142988
D10	38	18S	0.260221	0.145594
D10	39	18S	0.263381	0.148754
D10	40	18S	0.266118	0.151491
D11	1	18S	0.10487	0
D11	2	18S	0.105235	0.000364974
D11	3	18S	0.10582	0.000949278
D11	4	18S	0.106681	0.00181048
D11	5	18S	0.106763	0.00189319
D11	6	18S	0.107308	0.00243754
D11	7	18S	0.108117	0.00324678
D11	8	18S	0.109222	0.00435215
D11	9	18S	0.109742	0.00487202
D11	10	18S	0.110771	0.00590099
D11	11	18S	0.112418	0.00754797
D11	12	18S	0.113681	0.00881057
D11	13	18S	0.11707	0.0121994
D11	14	18S	0.120713	0.0158423
D11	15	18S	0.12597	0.0210993
D11	16	18S	0.131988	0.0271176
D11	17	18S	0.138076	0.0332055
D11	18	18S	0.145056	0.0401859
D11	19	18S	0.152394	0.0475241
D11	20	18S	0.159518	0.0546474
D11	21	18S	0.16735	0.0624799
D11	22	18S	0.174346	0.0694754
D11	23	18S	0.182413	0.077543
D11	24	18S	0.190485	0.0856149
D11	25	18S	0.196187	0.0913166
D11	26	18S	0.203585	0.0987146
D11	27	18S	0.210307	0.105437
D11	28	18S	0.215671	0.110801
D11	29	18S	0.221119	0.116249
D11	30	18S	0.226741	0.121871
D11	31	18S	0.231165	0.126295
D11	32	18S	0.23609	0.13122
D11	33	18S	0.240268	0.135397
D11	34	18S	0.24517	0.140299
D11	35	18S	0.247958	0.143088
D11	36	18S	0.252054	0.147184
D11	37	18S	0.255004	0.150134
D11	38	18S	0.258111	0.153241
D11	39	18S	0.261443	0.156572
D11	40	18S	0.264081	0.159211
D12	1	18S	0.0957351	0
D12	2	18S	0.0982763	0.00254121
D12	3	18S	0.0993386	0.00360355
D12	4	18S	0.101292	0.00555725
D12	5	18S	0.101508	0.00577329
D12	6	18S	0.102246	0.00651141
D12	7	18S	0.102597	0.00686231
D12	8	18S	0.103237	0.00750237
D12	9	18S	0.104229	0.00849396
D12	10	18S	0.105002	0.00926674
D12	11	18S	0.105858	0.0101225
D12	12	18S	0.107449	0.0117136
D12	13	18S	0.109559	0.0138235
D12	14	18S	0.112133	0.0163976
D12	15	18S	0.115691	0.0199559
D12	16	18S	0.120265	0.02453
D12	17	18S	0.12657	0.0308346
D12	18	18S	0.13304	0.0373047
D12	19	18S	0.13934	0.0436046
D12	20	18S	0.146627	0.0508921
D12	21	18S	0.153888	0.0581531
D12	22	18S	0.161818	0.0660825
D12	23	18S	0.168223	0.0724876
D12	24	18S	0.175464	0.079729
D12	25	18S	0.182094	0.0863587
D12	26	18S	0.189348	0.0936134
D12	27	18S	0.195359	0.0996244
D12	28	18S	0.201115	0.10538
D12	29	18S	0.207106	0.111371
D12	30	18S	0.211513	0.115778
D12	31	18S	0.21768	0.121945
D12	32	18S	0.221759	0.126024
D12	33	18S	0.226612	0.130877
D12	34	18S	0.230463	0.134728
D12	35	18S	0.234522	0.138787
D12	36	18S	0.237817	0.142082
D12	37	18S	0.241138	0.145403
D12	38	18S	0.244243	0.148508
D12	39	18S	0.247591	0.151856
D12	40	18S	0.250025	0.15429
E4	1	18S	0.118841	0
E4	2	18S	0.118911	6.95661e-05
E4	3	18S	0.119956	0.0011146
E4	4	18S	0.11997	0.00112864
E4	5	18S	0.120698	0.00185656
E4	6	18S	0.121607	0.00276516
E4	7	18S	0.121406	0.00256494
E4	8	18S	0.122215	0.0033736
E4	9	18S	0.124352	0.0055105
E4	10	18S	0.12337	0.00452874
E4	11	18S	0.124696	0.00585494
E4	12	18S	0.125329	0.00648778
E4	13	18S	0.128743	0.00990146
E4	14	18S	0.131987	0.0131455
E4	15	18S	0.13419	0.0153489
E4	16	18S	0.139046	0.0202045
E4	17	18S	0.145146	0.0263046
E4	18	18S	0.15076	0.0319184
E4	19	18S	0.157556	0.0387146
E4	20	18S	0.165227	0.0463853
E4	21	18S	0.172498	0.0536566
E4	22	18S	0.178759	0.0599181
E4	23	18S	0.186633	0.0677912
E4	24	18S	0.197133	0.0782913
E4	25	18S	0.201443	0.0826018
E4	26	18S	0.207972	0.0891303
E4	27	18S	0.215182	0.0963403
E4	28	18S	0.220897	0.102055
E4	29	18S	0.225971	0.10713
E4	30	18S	0.232005	0.113163
E4	31	18S	0.240557	0.121716
E4	32	18S	0.244291	0.12545
E4	33	18S	0.247474	0.128632
E4	34	18S	0.252619	0.133777
E4	35	18S	0.255798	0.136956
E4	36	18S	0.260143	0.141301
E4	37	18S	0.268278	0.149437
E4	38	18S	0.267892	0.14905
E4	39	18S	0.270417	0.151576
E4	40	18S	0.274456	0.155614
E5	1	18S	0.121002	0
E5	2	18S	0.121312	0.000310414
E5	3	18S	0.121669	0.00066708
E5	4	18S	0.122598	0.00159671
E5	5	18S	0.122391	0.00138967
E5	6	18S	0.122812	0.00181056
E5	7	18S	0.123217	0.00221484
E5	8	18S	0.123946	0.00294408
E5	9	18S	0.123733	0.00273123
E5	10	18S	0.124821	0.00381905
E5	11	18S	0.125499	0.00449716
E5	12	18S	0.127439	0.00643735
E5	13	18S	0.129309	0.00830717
E5	14	18S	0.132236	0.0112345
E5	15	18S	0.136586	0.0155845
E5	16	18S	0.141509	0.0205077
E5	17	18S	0.147452	0.0264504
E5	18	18S	0.153309	0.0323068
E5	19	18S	0.160866	0.0398645
E5	20	18S	0.168032	0.0470304
E5	21	18S	0.175343	0.054341
E5	22	18S	0.18271	0.061708
E5	23	18S	0.18959	0.0685886
E5	24	18S	0.196454	0.0754527
E5	25	18S	0.203703	0.0827009
E5	26	18S	0.209957	0.0889556
E5	27	18S	0.216625	0.0956236
E5	28	18S	0.222826	0.101824
E5	29	18S	0.229462	0.108461
E5	30	18S	0.235239	0.114237
E5	31	18S	0.240036	0.119034
E5	32	18S	0.244945	0.123943
E5	33	18S	0.250494	0.129493
E5	34	18S	0.255296	0.134294
E5	35	18S	0.259169	0.138168
E5	36	18S	0.262507	0.141505
E5	37	18S	0.26584	0.144839
E5	38	18S	0.269732	0.14873
E5	39	18S	0.273719	0.152718
E5	40	18S	0.275755	0.154753
E6	1	18S	0.112497	0
E6	2	18S	0.112898	0.000400625
E6	3	18S	0.114061	0.00156414
E6	4	18S	0.114343	0.00184577
E6	5	18S	0.114467	0.00197005
E6	6	18S	0.115101	0.00260326
E6	7	18S	0.114984	0.00248688
E6	8	18S	0.116618	0.00412111
E6	9	18S	0.116717	0.00421941
E6	10	18S	0.117896	0.00539881
E6	11	18S	0.118585	0.00608795
E6	12	18S	0.120773	0.00827532
E6	13	18S	0.122958	0.0104602
E6	14	18S	0.126998	0.0145007
E6	15	18S	0.131305	0.0188079
E6	16	18S	0.137686	0.0251883
E6	17	18S	0.143918	0.0314208
E6	18	18S	0.151185	0.0386873
E6	19	18S	0.158075	0.0455778
E6	20	18S	0.165656	0.0531589
E6	21	18S	0.172774	0.060277
E6	22	18S	0.180653	0.0681561
E6	23	18S	0.187681	0.0751841
E6	24	18S	0.19523	0.0827331
E6	25	18S	0.201663	0.0891657
E6	26	18S	0.208196	0.0956985
E6	27	18S	0.214549	0.102052
E6	28	18S	0.221007	0.10851
E6	29	18S	0.226952	0.114455
E6	30	18S	0.232301	0.119803
E6	31	18S	0.237468	0.12497
E6	32	18S	0.242106	0.129609
E6	33	18S	0.246826	0.134328
E6	34	18S	0.250586	0.138089
E6	35	18S	0.254855	0.142358
E6	36	18S	0.258282	0.145784
E6	37	18S	0.26165	0.149152
E6	38	18S	0.264477	0.15198
E6	39	18S	0.267184	0.154687
E6	40	18S	0.270517	0.15802
E7	1	18S	0.128677	0
E7	2	18S	0.128554	-0.000122964
E7	3	18S	0.129054	0.000377625
E7	4	18S	0.129897	0.00122014
E7	5	18S	0.130468	0.00179139
E7	6	18S	0.131244	0.00256707
E7	7	18S	0.131477	0.00280057
E7	8	18S	0.132529	0.00385268
E7	9	18S	0.132764	0.00408684
E7	10	18S	0.133794	0.00511774
E7	11	18S	0.134858	0.00618093
E7	12	18S	0.136225	0.00754879
E7	13	18S	0.13854	0.00986353
E7	14	18S	0.141649	0.0129723
E7	15	18S	0.145653	0.0169762
E7	16	18S	0.15095	0.0222736
E7	17	18S	0.156507	0.0278301
E7	18	18S	0.163185	0.0345085
E7	19	18S	0.16989	0.0412136
E7	20	18S	0.176553	0.0478759
E7	21	18S	0.184309	0.0556324
E7	22	18S	0.191503	0.0628264
E7	23	18S	0.198463	0.0697858
E7	24	18S	0.205838	0.0771618
E7	25	18S	0.212974	0.0842975
E7	26	18S	0.219909	0.0912323
E7	27	18S	0.227019	0.0983421
E7	28	18S	0.23404	0.105364
E7	29	18S	0.239392	0.110715
E7	30	18S	0.244844	0.116168
E7	31	18S	0.250336	0.121659
E7	32	18S	0.254987	0.126311
E7	33	18S	0.260546	0.131869
E7	34	18S	0.264249	0.135572
E7	35	18S	0.269163	0.140486
E7	36	18S	0.273775	0.145098
E7	37	18S	0.277934	0.149258
E7	38	18S	0.281317	0.15264
E7	39	18S	0.284139	0.155463
E7	40	18S	0.286952	0.158276
E8	1	18S	0.119568	0
E8	2	18S	0.119925	0.000357062
E8	3	18S	0.120938	0.00137047
E8	4	18S	0.121071	0.00150298
E8	5	18S	0.121591	0.00202312
E8	6	18S	0.12196	0.00239228
E8	7	18S	0.121855	0.00228705
E8	8	18S	0.122471	0.00290344
E8	9	18S	0.122982	0.00341352
E8	10	18S	0.123749	0.0041813
E8	11	18S	0.124749	0.00518133
E8	12	18S	0.126267	0.00669914
E8	13	18S	0.128313	0.00874471
E8	14	18S	0.131697	0.0121292
E8	15	18S	0.135977	0.0164088
E8	16	18S	0.140785	0.0212171
E8	17	18S	0.145674	0.0261064
E8	18	18S	0.152572	0.0330037
E8	19	18S	0.159139	0.0395706
E8	20	18S	0.165269	0.0457008
E8	21	18S	0.172029	0.0524606
E8	22	18S	0.179694	0.0601257
E8	23	18S	0.186333	0.0667651
E8	24	18S	0.193408	0.0738401
E8	25	18S	0.199854	0.0802856
E8	26	18S	0.206218	0.0866502
E8	27	18S	0.212814	0.0932459
E8	28	18S	0.219083	0.0995151
E8	29	18S	0.224981	0.105413
E8	30	18S	0.230358	0.11079
E8	31	18S	0.235521	0.115953
E8	32	18S	0.240739	0.121171
E8	33	18S	0.245175	0.125607
E8	34	18S	0.24982	0.130252
E8	35	18S	0.254007	0.134439
E8	36	18S	0.2576	0.138032
E8	37	18S	0.262087	0.142519
E8	38	18S	0.264907	0.145339
E8	39	18S	0.268831	0.149263
E8	40	18S	0.271378	0.15181
E9	1	18S	0.115946	0
E9	2	18S	0.116213	0.000267416
E9	3	18S	0.116265	0.000319734
E9	4	18S	0.116853	0.000907153
E9	5	18S	0.117178	0.00123198
E9	6	18S	0.117526	0.00158015
E9	7	18S	0.118409	0.00246364
E9	8	18S	0.118647	0.00270133
E9	9	18S	0.11954	0.00359444
E9	10	18S	0.120347	0.00440116
E9	11	18S	0.121469	0.00552297
E9	12	18S	0.122664	0.00671868
E9	13	18S	0.12514	0.00919455
E9	14	18S	0.127788	0.0118427
E9	15	18S	0.132932	0.0169866
E9	16	18S	0.137961	0.0220153
E9	17	18S	0.143321	0.0273755
E9	18	18S	0.149828	0.0338825
E9	19	18S	0.156602	0.0406562
E9	20	18S	0.163968	0.0480222
E9	21	18S	0.170869	0.0549229
E9	22	18S	0.177854	0.0619084
E9	23	18S	0.185158	0.0692119
E9	24	18S	0.192346	0.0764004
E9	25	18S	0.199037	0.0830916
E9	26	18S	0.205866	0.0899205
E9	27	18S	0.212602	0.0966568
E9	28	18S	0.218469	0.102523
E9	29	18S	0.224275	0.108329
E9	30	18S	0.230648	0.114702
E9	31	18S	0.235873	0.119927
E9	32	18S	0.240955	0.12501
E9	33	18S	0.246091	0.130146
E9	34	18S	0.249977	0.134031
E9	35	18S	0.254228	0.138282
E9	36	18S	0.25758	0.141634
E9	37	18S	0.262142	0.146196
E9	38	18S	0.265128	0.149182
E9	39	18S	0.268457	0.152511
E9	40	18S	0.271131	0.155185
E10	1	18S	0.120614	0
E10	2	18S	0.120685	7.15852e-05
E10	3	18S	0.121551	0.000936903
E10	4	18S	0.121613	0.000999615
E10	5	18S	0.122379	0.0017651
E10	6	18S	0.122785	0.00217097
E10	7	18S	0.122993	0.00237881
E10	8	18S	0.123602	0.00298813
E10	9	18S	0.123934	0.00332021
E10	10	18S	0.124625	0.00401156
E10	11	18S	0.124961	0.00434707
E10	12	18S	0.126347	0.00573299
E10	13	18S	0.127483	0.00686946
E10	14	18S	0.12965	0.00903631
E10	15	18S	0.13328	0.0126665
E10	16	18S	0.137182	0.0165685
E10	17	18S	0.141805	0.0211911
E10	18	18S	0.147856	0.0272418
E10	19	18S	0.154216	0.0336018
E10	20	18S	0.16096	0.0403459
E10	21	18S	0.167483	0.0468694
E10	22	18S	0.174482	0.0538681
E10	23	18S	0.182144	0.06153
E10	24	18S	0.188857	0.0682429
E10	25	18S	0.195977	0.0753628
E10	26	18S	0.202311	0.0816973
E10	27	18S	0.209205	0.0885914
E10	28	18S	0.215457	0.0948436
E10	29	18S	0.221545	0.100931
E10	30	18S	0.227153	0.106539
E10	31	18S	0.232144	0.11153
E10	32	18S	0.238035	0.117421
E10	33	18S	0.243047	0.122434
E10	34	18S	0.247402	0.126789
E10	35	18S	0.252365	0.131751
E10	36	18S	0.25587	0.135256
E10	37	18S	0.259619	0.139005
E10	38	18S	0.2633	0.142686
E10	39	18S	0.267045	0.146431
E10	40	18S	0.270079	0.149465
E11	1	18S	0.122655	0
E11	2	18S	0.123183	0.000528067
E11	3	18S	0.12353	0.000875503
E11	4	18S	0.123801	0.00114596
E11	5	18S	0.124364	0.00170874
E11	6	18S	0.124837	0.0021817
E11	7	18S	0.125735	0.00307969
E11	8	18S	0.126137	0.00348204
E11	9	18S	0.126383	0.0037281
E11	10	18S	0.127543	0.00488838
E11	11	18S	0.128085	0.00543053
E11	12	18S	0.129864	0.0072095
E11	13	18S	0.131808	0.00915318
E11	14	18S	0.134535	0.0118798
E11	15	18S	0.138793	0.016138
E11	16	18S	0.143485	0.0208298
E11	17	18S	0.149176	0.0265216
E11	18	18S	0.155127	0.0324721
E11	19	18S	0.16186	0.0392047
E11	20	18S	0.168907	0.046252
E11	21	18S	0.175978	0.053323
E11	22	18S	0.183775	0.0611197
E11	23	18S	0.191221	0.0685665
E11	24	18S	0.19854	0.0758851
E11	25	18S	0.205866	0.0832111
E11	26	18S	0.21228	0.0896253
E11	27	18S	0.219414	0.0967594
E11	28	18S	0.225764	0.103109
E11	29	18S	0.231924	0.109269
E11	30	18S	0.238172	0.115517
E11	31	18S	0.243703	0.121048
E11	32	18S	0.248845	0.12619
E11	33	18S	0.253576	0.130921
E11	34	18S	0.259238	0.136583
E11	35	18S	0.26317	0.140515
E11	36	18S	0.267153	0.144498
E11	37	18S	0.271818	0.149163
E11	38	18S	0.274829	0.152174
E11	39	18S	0.278466	0.155812
E11	40	18S	0.28192	0.159265
E12	1	18S	0.108162	0
E12	2	18S	0.110842	0.00267956
E12	3	18S	0.112475	0.0043129
E12	4	18S	0.113673	0.00551054
E12	5	18S	0.114314	0.00615194
E12	6	18S	0.11486	0.00669763
E12	7	18S	0.115251	0.00708935
E12	8	18S	0.116227	0.00806482
E12	9	18S	0.116547	0.00838537
E12	10	18S	0.116784	0.00862168
E12	11	18S	0.118019	0.00985729
E12	12	18S	0.11827	0.0101079
E12	13	18S	0.119688	0.0115258
E12	14	18S	0.122131	0.0139686
E12	15	18S	0.12512	0.0169577
E12	16	18S	0.128547	0.0203848
E12	17	18S	0.133508	0.0253458
E12	18	18S	0.138641	0.0304789
E12	19	18S	0.144476	0.0363145
E12	20	18S	0.151521	0.0433587
E12	21	18S	0.15816	0.0499981
E12	22	18S	0.164809	0.0566465
E12	23	18S	0.17109	0.0629284
E12	24	18S	0.178416	0.0702537
E12	25	18S	0.185219	0.0770575
E12	26	18S	0.192166	0.0840039
E12	27	18S	0.198748	0.0905861
E12	28	18S	0.205464	0.0973024
E12	29	18S	0.211349	0.103187
E12	30	18S	0.216917	0.108755
E12	31	18S	0.222929	0.114767
E12	32	18S	0.227792	0.11963
E12	33	18S	0.232723	0.124561
E12	34	18S	0.237342	0.12918
E12	35	18S	0.242421	0.134259
E12	36	18S	0.246234	0.138072
E12	37	18S	0.250012	0.14185
E12	38	18S	0.253672	0.14551
E12	39	18S	0.257066	0.148904
E12	40	18S	0.260209	0.152047
F4	1	18S	0.124866	0
F4	2	18S	0.124731	-0.000135191
F4	3	18S	0.124958	9.22307e-05
F4	4	18S	0.125146	0.000280082
F4	5	18S	0.126229	0.00136352
F4	6	18S	0.126317	0.00145124
F4	7	18S	0.126527	0.00166136
F4	8	18S	0.127331	0.00246514
F4	9	18S	0.127938	0.00307164
F4	10	18S	0.127565	0.0026989
F4	11	18S	0.127825	0.00295915
F4	12	18S	0.127908	0.00304189
F4	13	18S	0.128473	0.00360747
F4	14	18S	0.128775	0.00390953
F4	15	18S	0.129189	0.00432284
F4	16	18S	0.130076	0.0052101
F4	17	18S	0.130964	0.00609829
F4	18	18S	0.13286	0.00799409
F4	19	18S	0.134461	0.00959523
F4	20	18S	0.138207	0.0133408
F4	21	18S	0.141868	0.0170018
F4	22	18S	0.14694	0.022074
F4	23	18S	0.152134	0.0272676
F4	24	18S	0.159588	0.0347218
F4	25	18S	0.165109	0.040243
F4	26	18S	0.171475	0.0466089
F4	27	18S	0.178551	0.0536848
F4	28	18S	0.184759	0.0598928
F4	29	18S	0.190999	0.066133
F4	30	18S	0.197882	0.0730165
F4	31	18S	0.204963	0.0800971
F4	32	18S	0.210827	0.0859613
F4	33	18S	0.216187	0.0913212
F4	34	18S	0.222003	0.0971373
F4	35	18S	0.227434	0.102568
F4	36	18S	0.23249	0.107624
F4	37	18S	0.239645	0.114779
F4	38	18S	0.242681	0.117815
F4	39	18S	0.247116	0.12225
F4	40	18S	0.251937	0.127071
F5	1	18S	0.124454	0
F5	2	18S	0.124275	-0.000179537
F5	3	18S	0.125077	0.000622995
F5	4	18S	0.125471	0.00101695
F5	5	18S	0.125382	0.000927351
F5	6	18S	0.12583	0.00137598
F5	7	18S	0.126005	0.00155083
F5	8	18S	0.126474	0.00201911
F5	9	18S	0.126479	0.00202435
F5	10	18S	0.127114	0.0026597
F5	11	18S	0.12779	0.00333556
F5	12	18S	0.127837	0.00338217
F5	13	18S	0.127819	0.00336457
F5	14	18S	0.12792	0.00346536
F5	15	18S	0.129004	0.00454908
F5	16	18S	0.129912	0.00545753
F5	17	18S	0.13138	0.0069259
F5	18	18S	0.133226	0.00877155
F5	19	18S	0.13611	0.0116559
F5	20	18S	0.14002	0.0155651
F5	21	18S	0.144875	0.0204203
F5	22	18S	0.151066	0.0266112
F5	23	18S	0.157159	0.032705
F5	24	18S	0.163728	0.0392737
F5	25	18S	0.170872	0.0464172
F5	26	18S	0.177644	0.0531892
F5	27	18S	0.184804	0.0603497
F5	28	18S	0.191581	0.0671266
F5	29	18S	0.19832	0.0738656
F5	30	18S	0.205398	0.0809436
F5	31	18S	0.211619	0.0871646
F5	32	18S	0.217758	0.0933034
F5	33	18S	0.22393	0.0994753
F5	34	18S	0.229915	0.10546
F5	35	18S	0.235121	0.110666
F5	36	18S	0.2401	0.115645
F5	37	18S	0.244956	0.120501
F5	38	18S	0.25005	0.125596
F5	39	18S	0.254443	0.129988
F5	40	18S	0.25859	0.134135
F6	1	18S	0.126484	0
F6	2	18S	0.127957	0.00147238
F6	3	18S	0.128089	0.00160441
F6	4	18S	0.128263	0.00177898
F6	5	18S	0.128707	0.00222275
F6	6	18S	0.129315	0.00283064
F6	7	18S	0.129156	0.00267193
F6	8	18S	0.129542	0.00305799
F6	9	18S	0.12975	0.00326607
F6	10	18S	0.13027	0.00378592
F6	11	18S	0.130729	0.00424454
F6	12	18S	0.131106	0.00462155
F6	13	18S	0.130524	0.00403991
F6	14	18S	0.131494	0.00500943
F6	15	18S	0.131804	0.00532016
F6	16	18S	0.132944	0.0064602
F6	17	18S	0.133863	0.00737859
F6	18	18S	0.136251	0.00976712
F6	19	18S	0.138831	0.0123466
F6	20	18S	0.14326	0.0167754
F6	21	18S	0.148081	0.0215965
F6	22	18S	0.154365	0.0278812
F6	23	18S	0.160772	0.0342873
F6	24	18S	0.167703	0.0412192
F6	25	18S	0.174424	0.0479399
F6	26	18S	0.181201	0.0547171
F6	27	18S	0.18843	0.0619458
F6	28	18S	0.195822	0.0693377
F6	29	18S	0.203313	0.0768286
F6	30	18S	0.209915	0.0834306
F6	31	18S	0.216853	0.0903692
F6	32	18S	0.222922	0.0964382
F6	33	18S	0.229212	0.102727
F6	34	18S	0.235052	0.108568
F6	35	18S	0.241042	0.114558
F6	36	18S	0.246165	0.119681
F6	37	18S	0.251395	0.124911
F6	38	18S	0.255801	0.129317
F6	39	18S	0.260617	0.134133
F6	40	18S	0.264907	0.138423
F7	1	18S	0.134585	0
F7	2	18S	0.134645	6.00666e-05
F7	3	18S	0.135737	0.00115226
F7	4	18S	0.136239	0.00165412
F7	5	18S	0.136338	0.00175269
F7	6	18S	0.137126	0.00254141
F7	7	18S	0.1371	0.00251518
F7	8	18S	0.137691	0.00310603
F7	9	18S	0.138377	0.0037923
F7	10	18S	0.138358	0.00377259
F7	11	18S	0.138144	0.00355941
F7	12	18S	0.138907	0.00432225
F7	13	18S	0.138785	0.00419998
F7	14	18S	0.139563	0.00497776
F7	15	18S	0.140054	0.00546956
F7	16	18S	0.140668	0.00608328
F7	17	18S	0.141944	0.0073593
F7	18	18S	0.143587	0.00900248
F7	19	18S	0.146369	0.0117836
F7	20	18S	0.150359	0.0157746
F7	21	18S	0.155582	0.0209972
F7	22	18S	0.160887	0.0263021
F7	23	18S	0.167636	0.0330513
F7	24	18S	0.175053	0.0404683
F7	25	18S	0.182043	0.0474577
F7	26	18S	0.189926	0.0553408
F7	27	18S	0.196965	0.06238
F7	28	18S	0.204544	0.0699586
F7	29	18S	0.211623	0.0770386
F7	30	18S	0.218507	0.0839217
F7	31	18S	0.225186	0.0906009
F7	32	18S	0.232121	0.097536
F7	33	18S	0.238109	0.103524
F7	34	18S	0.243905	0.10932
F7	35	18S	0.249404	0.114819
F7	36	18S	0.254953	0.120369
F7	37	18S	0.260042	0.125457
F7	38	18S	0.264415	0.12983
F7	39	18S	0.268679	0.134094
F7	40	18S	0.2728	0.138215
F8	1	18S	0.12567	0
F8	2	18S	0.125321	-0.000349134
F8	3	18S	0.126186	0.00051555
F8	4	18S	0.126436	0.000765249
F8	5	18S	0.12656	0.000889838
F8	6	18S	0.127304	0.00163388
F8	7	18S	0.127163	0.00149274
F8	8	18S	0.127722	0.00205159
F8	9	18S	0.127928	0.00225787
F8	10	18S	0.128461	0.00279072
F8	11	18S	0.128527	0.00285703
F8	12	18S	0.129024	0.00335358
F8	13	18S	0.129278	0.00360733
F8	14	18S	0.129194	0.00352331
F8	15	18S	0.130224	0.00455391
F8	16	18S	0.130775	0.00510496
F8	17	18S	0.132045	0.006375
F8	18	18S	0.134404	0.00873335
F8	19	18S	0.137361	0.0116902
F8	20	18S	0.141606	0.0159361
F8	21	18S	0.146467	0.0207962
F8	22	18S	0.152735	0.0270644
F8	23	18S	0.158683	0.0330129
F8	24	18S	0.165743	0.0400729
F8	25	18S	0.17279	0.0471199
F8	26	18S	0.18011	0.05444
F8	27	18S	0.187393	0.0617222
F8	28	18S	0.195044	0.0693732
F8	29	18S	0.202391	0.0767209
F8	30	18S	0.209472	0.0838017
F8	31	18S	0.215829	0.0901584
F8	32	18S	0.221985	0.0963145
F8	33	18S	0.228254	0.102584
[truncated: 167 more rows]

## Sheet: BioGroup Analysis Result
Block Type	96well
Chemistry	TAQMAN
Experiment File Name	C:\Users\11193327\Downloads\SK10042014 (2).eds
Experiment Run End Time	Not Started
Instrument Type	steponeplus
Passive Reference	ROX
Biogroup Name	Target Name	Task	RQ	RQ Min	RQ Max	Cт Mean	ΔCт Mean	ΔCт SE	ΔΔCт
Analysis Type	Singleplex
Endogenous Control	P53
RQ Min/Max Confidence Level	95.0
Reference Biogroup Name

## Sheet: Technical Analysis Result
Block Type	96well
Chemistry	TAQMAN
Experiment File Name	C:\Users\11193327\Downloads\SK10042014 (2).eds
Experiment Run End Time	Not Started
Instrument Type	steponeplus
Passive Reference	ROX
Sample Name	Target Name	Task	RQ	RQ Min	RQ Max	Cт Mean	ΔCт Mean	ΔCт SE	ΔΔCт
	P53	NTC
1a2a3a	P53	UNKNOWN				23.6416
345	P53	UNKNOWN				22.3252
7a8a9a	P53	UNKNOWN				20.878
	18S	NTC
1a2a3a	18S	UNKNOWN	1	0.374063	2.67335	9.15617	-14.4855	0.669203	0
345	18S	UNKNOWN	0.0725629	0.0283258	0.185886	11.6244	-10.7008	0.640176	3.78462
7a8a9a	18S	UNKNOWN	0.00243101	0.000328323	0.018	15.0768	-5.80123	1.3625	8.68423
Analysis Type	Singleplex
Endogenous Control	P53
RQ Min/Max Confidence Level	95.0
Reference Sample	1a2a3a

[truncated: 1 more sheets: Sheet4]
